# Supplementary material for: The nucleosomal acidic patch relieves auto-inhibition by the ISWI remodeler SNF2h
Source: eLife. 2018 Apr 17;7:e35322. doi: 10.7554/eLife.35322 (PMC5976439; doi:10.7554/eLife.35322)
Supplement: Figure 1—figure supplement 2—source data 1. [file elife-35322-fig1-figsupp2-data1.xlsx]

## Sheet: Sheet1
	Fraction ATP Hydrolyzed
Time (minutes)	WT Nucleosomes	APM Nucleosomes	No Nucleosomes
1	0.0485928	0.0394199	0.025544
2	0.0652271	0.0473273	0.0259112
3	0.0740605	0.0514784	0.015178
5	0.089598	0.0550923	0.0286381
10		0.0691385	0.0315721
15		0.0773792	0.0320843
