# Supplementary material for: The nucleosomal acidic patch relieves auto-inhibition by the ISWI remodeler SNF2h
Source: eLife. 2018 Apr 17;7:e35322. doi: 10.7554/eLife.35322 (PMC5976439; doi:10.7554/eLife.35322)
Supplement: Figure 1—figure supplement 3—source data 1. [file elife-35322-fig1-figsupp3-data1.xlsx]

## Sheet: Sheet1
SNF2h	WT							2RA
Nucleosome	WT	E61A	E64A	E64R	D90A	D90RE92A	APM	WT	E61A	E64A	E64R	D90A	D90RE92A	APM
kobs (min^-1)	2.202	0.03646	0.4602	0.05755	0.02703	0.0251	0.02045	4.447	0.4515	1.235	0.3048	0.4412	0.3259	0.6283
	2.111	0.02293	0.4386	0.04479	0.01782	0.01758	0.01959	3.653	0.4232	1.296	0.5044	0.4394	0.2494	0.3525
	2.244	0.01966	0.5089	0.05628	0.01455	0.01811	0.0183	2.923	0.3415	0.495	0.3444	0.8284	0.8727	0.3514
