# Supplementary material for: The nucleosomal acidic patch relieves auto-inhibition by the ISWI remodeler SNF2h
Source: eLife. 2018 Apr 17;7:e35322. doi: 10.7554/eLife.35322 (PMC5976439; doi:10.7554/eLife.35322)
Supplement: Figure 2—figure supplement 1—source data 1. [file elife-35322-fig2-figsupp1-data1.xlsx]

## Sheet: Sheet1
	Panel A					Panel B
		Fraction End-positioned					Fraction End-positioned
	Time (minutes)	WT	K112E	K129E		Time (minutes)	WT	K97E	K128E
	0.25	0.632804	0.587758	0.555556		0.25	0.59187	0.537881	0.481154
	0.5	0.540903	0.476112	0.455735		0.5	0.459153	0.394168	0.348515
	1	0.4272	0.396286	0.370849		1	0.350039	0.29909	0.266835
	5	0.365661	0.356317	0.356699		5	0.276882	0.254696	0.257861
	12	0.386774	0.366074	0.354385		12	0.293312	0.240104	0.254055
	20	0.390729	0.362298	0.344439		20	0.272296	0.245381	0.25034
