# Supplementary material for: The nucleosomal acidic patch relieves auto-inhibition by the ISWI remodeler SNF2h
Source: eLife. 2018 Apr 17;7:e35322. doi: 10.7554/eLife.35322 (PMC5976439; doi:10.7554/eLife.35322)
Supplement: Figure 2—figure supplement 2—source data 1. [file elife-35322-fig2-figsupp2-data1.xlsx]

## Sheet: Sheet1
	Panel A													Panel B
		WT SNF2h/WT Nucleosomes			2RA SNF2h/WT Nucleosomes			WT SNF2h/APM Nucleosomes			2RA SNF2h/APM Nucleosomes			Nucleosomes	WT				APM
		Time (min)	Normalized cy5 Fluorescence		Time (min)	Normalized cy5 Fluorescence		Time (min)	Normalized cy5 Fluorescence		Time (min)	Normalized cy5 Fluorescence		SNF2h	WT		2RA		WT		2RA
		0.133333	92.2334		0.133333	68.0912		0.266667	98.8361		0.25	94.6214		phase	fast	slow	fast	slow	fast	slow	fast	slow
		0.1395	93.0641		0.139333	71.6361		0.283	98.7754		0.267833	97.982		kobs (min^-1)	0.4815	0.1279	1.555	0.2223	0.03128	0.002127	0.2068	0.02086
		0.157167	92.9578		0.157833	73.5716		0.301333	98.2153		0.286	97.9753			0.5095	0.07028	1.093	0.2078	0.06918	0.008098	0.1648	0.01281
		0.176	92.3978		0.176167	75.1102		0.319667	100.859		0.304167	96.1706			0.5085	0.08661	1.046	0.2034	0.01003	0.009909	0.2105	0.01604
		0.194333	93.1505		0.194	76.5826		0.337833	98.8541		0.3225	95.9628
		0.211833	92.4775		0.212333	78.2719		0.355833	97.7901		0.340667	97.431
		0.230833	90.1137		0.229833	78.2741		0.374333	99.7579		0.359	98.0959
		0.249	90.2184		0.248667	77.2492		0.391667	97.4403		0.377167	96.0724
		0.267167	93.3527		0.266333	78.5087		0.410833	100.434		0.394667	96.6487
		0.285167	90.9271		0.2855	77.8533		0.428833	98.4556		0.413833	95.7716
		0.303	90.9271		0.303667	77.1744		0.447	99.9776		0.431833	95.5395
		0.322167	90.2336		0.321667	76.0642		0.465833	100.382		0.450167	95.3512
		0.340167	90.1802		0.339333	75.1055		0.483167	99.9035		0.468333	95.1238
		0.357667	90.363		0.358167	74.9641		0.501833	97.2888		0.486333	94.8373
		0.3765	90.1309		0.375667	72.9195		0.52	96.0285		0.504833	95.0461
		0.395167	88.3129		0.394167	70.1724		0.538333	99.3588		0.523	96.5348
		0.4135	89.8418		0.413	68.3793		0.556167	100.672		0.541167	95.7864
		0.431667	87.9369		0.431	66.9095		0.575	98.1639		0.5595	95.5829
		0.449667	85.8193		0.449167	64.9978		0.593167	98.4009		0.577667	93.5221
		0.467333	88.1778		0.467167	62.2106		0.611167	95.7054		0.595833	96.5729
		0.486167	85.9403		0.485167	59.7936		0.629333	97.7641		0.614167	95.4046
		0.503833	85.6459		0.503333	57.0603		0.647833	99.3715		0.632333	94.8921
		0.522	85.6721		0.522167	53.5754		0.665833	98.0865		0.6505	93.7514
		0.540833	83.5168		0.539833	49.8009		0.684167	98.1659		0.668167	93.7143
		0.5585	85.9235		0.558333	48.1651		0.702667	98.9149		0.687	94.3034
		0.577333	83.1538		0.576167	44.6867		0.721167	98.9115		0.705333	93.7486
		0.596333	82.6698		0.5945	43.5118		0.738667	97.8735		0.7235	96.5315
		0.613833	81.9156		0.613333	43.1615		0.7575	101.74		0.741833	93.5193
		0.631333	84.1228		0.632167	41.4443		0.775833	98.0785		0.76	94.8769
		0.650167	81.9376		0.649833	41.3702		0.794167	98.2467		0.778167	92.9096
		0.667833	81.4453		0.668	40.8804		0.812333	98.7293		0.7965	93.1985
		0.687333	81.4751		0.685667	39.5464		0.8305	98.3121		0.815	94.3754
		0.7055	81.1598		0.7045	40.4683		0.849333	96.3997		0.833167	94.874
		0.723167	79.1291		0.722667	39.5016		0.867667	98.1926		0.851333	93.75
		0.741833	78.9888		0.740833	38.5082		0.8855	99.1478		0.869667	92.5082
		0.759667	79.171		0.758833	36.944		0.9035	97.0165		0.887833	94.2476
		0.777167	77.9815		0.777667	37.3807		0.9215	97.8442		0.906167	91.9925
		0.796	78.7583		0.795167	36.4982		0.94	99.9268		0.924333	92.9654
		0.813667	76.4113		0.813667	38.2486		0.958167	98.8648		0.9425	95.3111
		0.8325	77.099		0.832333	35.4289		0.976667	96.8576		0.960833	92.8124
		0.850167	77.4007		0.850333	35.862		0.994833	98.4857		0.979167	92.1855
		0.8695	76.9099		0.868167	35.5164		1.01317	98.4075		0.996833	91.5201
		0.887167	75.4051		0.886167	34.5891		1.03133	95.7615		1.01567	92.9077
		0.905167	75.5052		0.905	33.1449		1.0495	98.782		1.03383	93.0211
		0.923833	74.1879		0.9225	32.3272		1.067	99.8975		1.05217	92.3218
		0.9415	73.8076		0.941	33.428		1.086	100.466		1.07033	89.1719
		0.9595	74.2093		0.959667	33.2881		1.1035	98.1045		1.0885	91.1154
		0.978167	74.103		0.9775	33.3445		1.12183	99.818		1.10683	90.3212
		0.996833	72.614		0.996333	32.7238		1.141	98.27		1.12517	89.6333
		1.01483	73.7097		1.0145	31.3811		1.159	100.598		1.14333	90.2006
		1.03267	72.0493		1.03267	31.9118		1.177	99.2026		1.1615	89.897
		1.0515	71.4218		1.05083	30.2648		1.19517	96.9023		1.17983	90.4895
		1.0695	72.3646		1.06833	28.8651		1.21483	96.4591		1.198	90.2349
		1.08767	71.656		1.08667	29.8606		1.23183	99.2573		1.21617	89.3097
		1.106	71.1071		1.1055	29.9749		1.25017	97.0912		1.2345	92.9644
		1.1235	69.6819		1.123	28.9518		1.2695	97.8983		1.25267	89.0956
		1.14183	70.666		1.1415	29.5743		1.28667	98.8855		1.27083	90.8522
		1.16067	69.3891		1.16017	28.7736		1.30483	100.164		1.28917	89.211
		1.1795	67.6517		1.17783	28.6637		1.32333	98.5618		1.309	91.021
		1.197	69.3891		1.19667	28.5426		1.34083	98.7747		1.32683	91.4209
		1.21467	69.4734		1.21533	27.2723		1.3605	97.6806		1.34517	89.5552
		1.2335	68.241		1.233	27.2289		1.3785	97.2327		1.363	88.597
		1.25183	68.1493		1.25133	26.2604		1.39683	98.2173		1.38133	89.968
		1.27	66.1401		1.2695	26.1169		1.41417	100.49		1.39983	88.9593
		1.28767	67.6769		1.28767	25.3791		1.43317	100.089		1.41767	88.2962
		1.3065	67.3715		1.306	26.0833		1.451	98.3975		1.43567	90.4523
		1.32467	67.316		1.32417	25.5251		1.46933	98.9376		1.47133	88.9831
		1.34233	66.0228		1.34183	24.3401		1.48783	97.0765		1.47467	88.0336
		1.36117	65.7703		1.36083	25.0006		1.50633	94.7969		1.494	89.8226
		1.37933	64.0052		1.37917	24.0899		1.52483	98.5571		1.51183	87.6646
		1.3975	65.6394		1.3965	25.4521		1.54233	98.5671		1.5315	87.8787
		1.41517	65.1135		1.415	23.6026		1.561	101.375		1.549	89.9541
		1.434	64.5274		1.433	23.8738		1.57933	97.1486		1.56783	87.912
		1.453	62.5999		1.45117	23.094		1.59767	99.3601		1.58633	87.8219
		1.47117	65.0517		1.47	23.3984		1.61567	99.4489		1.60483	88.2986
		1.48867	63.361		1.48817	22.9917		1.63417	97.7567		1.62233	86.8047
		1.50633	63.1069		1.5065	23.6424		1.6525	96.1847		1.6415	88.3534
		1.52517	62.745		1.52417	22.1812		1.6705	97.4784		1.66067	88.3315
		1.544	62.7288		1.5425	22.3583		1.68883	98.0511		1.6775	87.3009
		1.56167	61.5152		1.56083	21.3895		1.707	97.4677		1.69633	87.5483
		1.57917	60.3189		1.57967	22.286		1.72517	97.4977		1.71417	89.2124
		1.59833	61.763		1.597	21.1415		1.7435	97.6566		1.7325	86.5978
		1.61633	61.2649		1.61633	21.648		1.76133	95.5713		1.751	88.7109
		1.63417	60.0885		1.6335	21.4864		1.7795	100.377		1.76967	85.0886
		1.65283	60.8244		1.65233	20.908		1.79817	98.5351		1.787	87.9344
		1.67033	61.4717		1.66983	20.0179		1.8165	97.2868		1.80567	86.1654
		1.68933	58.8733		1.68883	20.3892		1.8345	98.5658		1.824	86.8724
		1.70817	61.158		1.70667	20.0979		1.852	98.7206		1.84217	86.3328
		1.72567	58.7712		1.72583	21.5894		1.87033	98.2674		1.86033	87.2709
		1.74383	59.2525		1.74367	19.9113		1.88833	97.3889		1.87867	85.092
		1.7615	57.864		1.761	19.5487		1.90667	96.658		1.89717	85.4542
		1.78033	58.3694		1.77983	19.8683		1.92583	100.323		1.91533	86.3957
		1.79917	56.5231		1.7975	19.8849		1.94383	96.7521		1.9335	86.2022
		1.81683	58.8676		1.81567	20.912		1.96233	100.296		1.95217	86.6174
		1.8355	57.3423		1.8345	18.1616		1.98	96.3496		1.97	87.8415
		1.85383	56.7347		1.8525	18.8825		1.99933	97.9483		1.98767	85.1673
		1.8715	57.676		1.8715	18.5954		2.017	96.5312		2.0065	84.6367
		1.88967	55.3305		1.8895	18.0579		2.03617	93.5714		2.02417	85.2583
		1.90733	55.8396		1.90767	18.4353		2.053	97.6232		2.0435	83.5313
		1.9255	55.9224		1.926	19.1887		2.07217	96.401		2.06117	85.5868
		1.94433	56.3236		1.94417	18.7082		2.09033	97.4657		2.0795	84.9942
		1.96317	56.146		1.96183	17.9039		2.10867	98.8034		2.09767	86.104
		1.98083	55.6029		1.98	18.3236		2.1265	96.2648		2.11617	85.8375
		1.99933	54.5826		1.999	16.7727		2.145	98.8301		2.13417	83.4707
		2.0175	55.6511		2.01717	17.5713		2.16333	99.1265		2.15167	84.6162
		2.0355	55.2949		2.03533	17.8605		2.1815	96.0265		2.1705	83.8168
		2.05383	53.7477		2.0535	17.3988		2.19983	96.5552		2.18883	85.5348
		2.07133	53.8556		2.07117	16.9177		2.217	98.8615		2.20633	84.5585
		2.09017	53.4423		2.09067	17.2409		2.23617	97.7334		2.22517	82.6175
		2.1085	55.1163		2.10833	16.6419		2.2545	99.2613		2.2435	82.9011
		2.126	54.1175		2.12583	16.5999		2.27267	97.2881		2.26167	82.6337
		2.145	52.9898		2.14533	17.0334		2.291	99.1505		2.28	83.1104
		2.16317	53.072		2.16233	16.0089		2.30867	97.5445		2.29817	84.8684
		2.18133	52.124		2.18117	16.5598		2.327	96.6106		2.3165	82.9397
		2.20017	52.4597		2.19933	15.8657		2.34567	97.7607		2.33467	82.9116
		2.21767	51.4991		2.21767	16.7015		2.36417	99.5784		2.35317	83.5122
		2.23667	51.7081		2.23517	15.7359		2.382	97.3529		2.37167	83.8545
		2.25433	51.2556		2.25467	16.2872		2.40067	96.7728		2.38933	83.5661
		2.2725	52.3351		2.27233	15.6152		2.41883	97.0171		2.4075	84.6162
		2.29017	50.8271		2.291	15.6329		2.43667	96.5899		2.42483	83.1628
		2.309	51.9763		2.30917	15.2009		2.455	96.4023		2.44333	83.1633
		2.32667	51.0534		2.32633	15.1131		2.4725	98.4336		2.46217	84.8059
		2.34483	50.8308		2.34517	14.6767		2.4915	97.4136		2.47983	83.3902
		2.36417	50.0095		2.36417	15.0118		2.50967	96.3269		2.49867	82.2857
		2.3815	49.4669		2.38167	15.1998		2.52867	98.1032		2.51683	83.4164
		2.40033	50.1525		2.39983	15.3831		2.54567	99.0464		2.5355	80.3957
		2.41917	49.261		2.41867	14.1077		2.56433	97.3389		2.55317	81.7561
		2.43617	49.4459		2.43633	14.9103		2.58267	96.9577		2.57217	82.3033
		2.455	49.3407		2.45467	14.1731		2.59983	96.8856		2.59033	82.5503
		2.474	50.4914		2.47283	14.1576		2.619	96.457		2.60833	83.2157
		2.4915	51.3472		2.491	14.6326		2.63717	98.5891		2.62683	82.5946
		2.50917	49.0495		2.50933	15.0574		2.65583	97.0979		2.64483	84.4794
		2.528	49.0453		2.52683	13.8796		2.674	95.2976		2.663	81.8462
		2.54567	49.3192		2.54517	14.1591		2.69217	98.9629		2.68133	80.3227
		2.5645	47.8511		2.564	12.683		2.7095	99.1552		2.6995	83.8316
		2.58317	49.2097		2.58217	13.5076		2.72867	97.8715		2.71767	82.3338
		2.60083	46.7438		2.59983	14.4175		2.74733	97.3622		2.73583	80.8733
		2.61917	47.8699		2.61867	13.2907		2.76517	97.3061		2.75417	80.4791
		2.63733	46.8255		2.63633	14.069		2.78333	98.9863		2.77233	79.3331
		2.6555	45.1735		2.65567	14.4728		2.8015	96.1393		2.79133	79.4494
		2.67317	47.2393		2.674	12.6776		2.81983	96.8035		2.809	82.2094
		2.69167	46.0299		2.69167	13.1591		2.838	95.8176		2.827	80.1659
		2.7105	47.1974		2.71033	12.849		2.856	96.2134		2.84533	81.9258
		2.72817	45.0494		2.728	12.246		2.8745	96.2895		2.8635	80.4209
		2.74667	46.5086		2.74617	12.8255		2.89267	98.2467		2.88083	79.7149
		2.76433	47.288		2.7645	13.127		2.911	95.9471		2.9	80.5982
		2.7825	45.6507		2.782	13.3442		2.92917	98.5431		2.91833	78.7859
		2.80133	47.6693		2.80033	12.567		2.9475	96.8576		2.93667	81.1221
		2.82017	46.8035		2.81917	11.8581		2.96567	98.3468		2.95483	80.9181
		2.83783	45.9252		2.83733	12.2463		2.98383	97.3662		2.97367	78.916
		2.856	45.6722		2.85617	13.0427		3.002	98.971		2.99167	79.8294
		2.87367	45.7162		2.87317	12.5666		3.02033	96.6707		3.00983	81.7552
		2.8925	44.8776		2.892	12.1588		3.0385	96.8549		3.02817	81.544
		2.91083	44.3166		2.9105	12.5948		3.05667	96.9637		3.04633	80.245
		2.929	44.1035		2.9285	11.2536		3.075	97.0925		3.0645	81.3733
		2.94667	43.5944		2.94683	12.2203		3.09317	96.8275		3.08283	80.3608
		2.9655	45.0887		2.965	11.2034		3.1115	96.4237		3.10117	80.5749
		2.98367	43.795		2.98383	11.3375		3.12967	96.6426		3.11933	80.4204
		3.00133	43.0512		3.0015	12.0294		3.148	94.5326		3.13767	78.9913
		3.02017	43.4336		3.01967	11.5407		3.16617	95.3416		3.15633	78.2448
		3.03767	41.5485		3.03733	12.1726		3.18433	96.7761		3.17417	77.7867
		3.056	43.3492		3.05617	12.032		3.20267	97.6259		3.19233	78.3817
		3.075	42.176		3.07367	11.6943		3.22083	97.4937		3.21067	78.7639
		3.09333	42.6102		3.0925	12.3541		3.239	98.0017		3.22917	79.335
		3.11133	43.189		3.11133	11.5671		3.25733	95.5973		3.247	77.3124
		3.1295	43.5415		3.129	11.5681		3.2755	95.8369		3.26533	79.0071
		3.14767	42.22		3.14667	10.6427		3.29367	94.9892		3.28283	78.5361
		3.16533	42.2174		3.1655	11.1936		3.312	94.3177		3.30183	79.8856
		3.18417	42.1105		3.18367	10.1525		3.33017	97.1479		3.32	78.9332
		3.203	43.5383		3.202	10.7566		3.34833	95.63		3.33833	77.4631
		3.22117	42.7815		3.2195	10.4092		3.36667	95.5312		3.35583	78.9313
		3.2395	42.2813		3.23833	11.2074		3.38483	95.3256		3.37533	78.8602
		3.25733	41.4071		3.25717	10.9464		3.40317	94.2048		3.393	78.2496
		3.27583	41.0085		3.27533	9.47178		3.42133	95.9671		3.41117	77.7706
		3.2935	39.555		3.293	10.0083		3.4395	95.5733		3.42933	77.4064
		3.31233	41.4794		3.31133	9.33947		3.45783	94.5092		3.44767	78.4927
		3.3305	39.4524		3.32883	10.1257		3.476	98.1359		3.46517	78.2639
		3.34833	42.3185		3.34717	11.1792		3.49433	94.9798		3.48333	76.7013
		3.3665	40.8205		3.366	10.2682		3.5125	96.6426		3.50233	78.57
		3.384	40.4376		3.38367	9.97644		3.53067	95.0192		3.52017	76.6108
		3.40283	40.3072		3.4025	10.0227		3.5485	94.827		3.539	74.9471
		3.4205	41.5276		3.42067	10.0249		3.56717	97.9517		3.557	77.1594
		3.43967	38.926		3.43883	9.7176		3.58533	96.8562		3.57517	77.3286
		3.457	41.1892		3.45717	9.32609		3.60367	97.3796		3.5935	77.2796
		3.47617	40.2176		3.47467	9.44611		3.62183	97.977		3.61167	76.1269
		3.4935	40.1427		3.49417	9.81882		3.64	97.2567		3.62983	76.0192
		3.51283	38.8254		3.51183	10.8473		3.65833	94.8303		3.64867	75.0816
		3.5305	38.8233		3.5305	10.7269		3.6765	95.8149		3.66667	76.1646
		3.54867	39.1983		3.54883	10.1471		3.69483	95.11		3.68483	77.3663
		3.567	39.4068		3.56667	10.2208		3.713	95.4671		3.70317	77.3329
		3.58517	37.6239		3.58467	8.9823		3.73117	95.0846		3.7215	77.8068
		3.60283	37.3122		3.60233	9.61421		3.7495	96.8042		3.73967	75.3104
		3.62167	38.9139		3.62167	9.34236		3.76767	93.9432		3.758	76.075
		3.6405	38.321		3.64	9.80544		3.786	94.9618		3.77617	76.2027
		3.65867	38.3624		3.65767	8.86372		3.80483	94.3671		3.7945	75.6283
		3.67633	38.4457		3.67583	9.54335		3.82267	96.5338		3.81267	74.2283
		3.6945	38.8851		3.69483	9.094		3.84033	96.722		3.83083	75.6369
		3.71283	39.6587		3.71233	9.5025		3.85867	95.4952		3.849	74.9857
		3.731	37.7135		3.73067	8.13782		3.87683	96.5899		3.86817	75.7665
		3.74867	37.6281		3.74833	9.64675		3.8955	94.61		3.885	74.6993
		3.76717	38.8485		3.76767	8.9241		3.91367	97.0959		3.90317	75.7237
		3.78517	38.0319		3.785	9.23788		3.93183	97.5745		3.92133	76.8543
		3.804	37.0451		3.80367	8.86626		3.95017	96.2428		3.94033	76.4406
		3.82367	36.6816		3.82133	8.31171		3.96767	96.1293		3.95883	75.8238
		3.84083	37.6469		3.83983	9.74978		3.98617	95.1961		3.97667	76.1293
		3.8595	37.5228		3.85817	9.05351		4.0045	97.5478		3.995	75.5973
		3.877	37.4175		3.877	8.32545		4.02283	96.5879		4.01317	76.2819
		3.89467	36.3071		3.89467	9.12835		4.04133	98.1886		4.03083	75.1397
		3.9135	34.8872		3.91333	8.06552		4.05967	96.929		4.049	74.7174
		3.9315	35.6168		3.9315	8.04311		4.077	95.7348		4.068	73.9537
		3.95	34.9438		3.94933	8.99314		4.096	97.0144		4.0855	75.707
		3.96883	35.6372		3.9675	8.217		4.11433	94.5112		4.10433	73.4456
		3.9865	36.0536		3.98567	8.48993		4.132	96.3482		4.1225	73.632
		4.00517	35.0087		4.00333	9.03616		4.15067	98.6245		4.14083	74.2216
		4.0225	33.7307		4.02233	9.19811		4.16917	96.8749		4.15933	74.602
		4.04083	36.502		4.041	7.50772		4.18767	94.7462		4.17667	75.6512
		4.05983	34.4666		4.05867	8.43245		4.206	96.662		4.1955	72.5685
		4.07783	36.6633		4.07683	8.23037		4.224	95.2542		4.2135	75.8209
		4.0955	34.6394		4.0945	8.51053		4.24167	95.4638		4.23183	74.6807
		4.11433	35.8022		4.11333	7.96756		4.26067	95.634		4.25067	75.4815
		4.133	34.9438		4.1315	9.804		4.27867	97.9209		4.26767	73.2711
		4.15083	35.4502		4.14917	7.38806		4.297	97.3108		4.28667	73.6534
		4.169	32.8162		4.16733	7.91405		4.316	96.7027		4.30483	73.2883
		4.18717	33.4421		4.18617	8.30484		4.3335	96.2388		4.32283	73.4913
		4.2055	33.5647		4.2045	7.31866		4.35167	97.2821		4.34133	74.9657
		4.22367	33.9805		4.22267	8.06986		4.37	97.2534		4.3595	72.6042
		4.24133	33.6265		4.241	7.60244		4.3875	95.3877		4.37717	72.9675
		4.26033	33.0613		4.25917	7.95346		4.4065	96.6433		4.396	74.8351
		4.279	32.9304		4.27733	8.0254		4.4245	96.5872		4.41417	71.505
		4.29667	32.8115		4.29533	7.16104		4.443	95.7628		4.43183	74.3594
		4.31483	34.0078		4.31317	7.92237		4.46117	93.7062		4.451	71.1346
		4.333	33.6511		4.33267	7.65087		4.47917	99.4996		4.469	72.8383
		4.35133	33.2048		4.34967	6.98534		4.49767	94.9284		4.4875	73.5214
		4.3695	31.8834		4.3685	8.48957		4.51583	93.8691		4.50567	72.2982
		4.38717	32.625		4.38617	7.15706		4.533	92.9339		4.52417	72.9031
		4.40617	33.3944		4.405	6.99728		4.55233	95.3096		4.542	72.2009
		4.42417	33.8103		4.42317	7.02475		4.57083	95.2809		4.56033	73.2139
		4.44183	31.4711		4.44083	7.30239		4.58917	96.3923		4.5785	74.2021
		4.46067	32.5779		4.459	7.26154		4.60667	96.8836		4.59683	72.0436
		4.47883	33.7742		4.47783	6.536		4.625	94.4758		4.615	72.9789
		4.49767	32.978		4.49617	7.77813		4.64367	95.1941		4.63283	72.3911
		4.51533	31.4497		4.51433	7.13139		4.66117	96.5939		4.6515	70.676
		4.53317	33.627		4.5325	6.53274		4.67967	98.3234		4.66967	72.0708
		4.552	31.7419		4.55133	6.55263		4.69783	97.1753		4.688	72.792
		4.57	32.4312		4.569	6.66758		4.71617	95.7301		4.70617	71.9154
		4.58833	32.3689		4.58733	7.57677		4.73433	96.0545		4.72433	71.8434
		4.6065	31.7896		4.60617	6.5219		4.753	96.5538		4.74267	70.7037
		4.62417	32.2647		4.62367	6.9416		4.771	95.4131		4.76083	72.6219
		4.643	31.909		4.64133	6.49189		4.789	95.5419		4.77967	72.4517
		4.66167	30.9023		4.66017	7.47193		4.80767	95.5986		4.79733	72.2181
		4.6795	30.3911		4.67833	6.98354		4.826	95.7068		4.81583	71.0955
		4.69767	31.8671		4.696	6.77134		4.84417	94.9304		4.83367	72.6014
		4.71517	31.744		4.71483	6.46442		4.86217	96.7968		4.852	70.0492
		4.734	30.9882		4.73367	6.30536		4.88067	94.7756		4.87017	72.3158
		4.75233	30.7368		4.75133	7.075		4.89833	97.1993		4.8885	72.3125
		4.7705	31.1281		4.769	6.2486		4.91667	96.8776		4.90667	70.1464
		4.78933	30.7405		4.7875	6.99041		4.93533	94.6461		4.92517	71.0745
		4.807	30.278		4.80633	5.69947		4.9535	94.2723		4.94333	70.3505
		4.82467	29.8124		4.82417	6.47779		4.97183	94.2349		4.961	70.8038
		4.8435	31.6985		4.84183	6.69904		4.98933	96.162		4.97983	70.5387
		4.861	31.7435		4.86	6.51684		5.00817	96.447		4.99817	71.1489
		4.8805	30.5708		4.87883	5.84263		5.0265	97.3896		5.01567	71.0402
		4.89817	29.6668		4.8965	6.13473		5.04417	94.4258		5.0345	71.7457
		4.91567	30.1298		4.91533	5.06359		5.06217	96.7301		5.05283	69.8013
		4.93467	30.3833		4.933	7.30636		5.08067	92.6922		5.071	69.1182
		4.95283	30.4231		4.95183	6.52515		5.09917	96.14		5.08917	70.1645
		4.971	30.421		4.97067	6.82411		5.11733	96.0539		5.10733	71.8029
		4.98933	30.3335		4.98833	6.87075		5.13567	95.403		5.1255	69.7784
		5.00683	31.1569		5.007	5.92794		5.15433	95.869		5.14383	70.7165
		5.02517	30.6305		5.02533	6.28945		5.173	95.4992		5.162	69.2851
		5.044	29.1812		5.043	5.78588		5.19133	94.8804		5.18033	70.2956
		5.06283	30.9411		5.06117	6.14232		5.20967	95.0419		5.198	70.482
		5.081	29.3577		5.07933	5.61091		5.22783	95.359		5.21733	70.7661
		5.09833	31.4659		5.09767	7.26045		5.246	94.5052		5.235	72.0341
		5.1165	28.3956		5.11567	5.98578		5.26417	94.3964		5.25317	70.8519
		5.13517	29.4379		5.13433	5.50933		5.28217	97.228		5.27183	67.8154
		5.15267	29.3143		5.15233	5.87408		5.30067	95.4371		5.28967	69.8981
		5.1715	30.0177		5.1705	6.33572		5.31883	94.3697		5.308	69.4743
		5.18917	30.3393		5.18883	5.74032		5.33683	94.3751		5.32617	69.746
		5.208	29.9155		5.20633	6.05881		5.35533	96.7748		5.3445	69.3628
		5.227	29.1875		5.22517	5.82781		5.3735	95.6434		5.36267	70.0659
		5.2445	28.7014		5.24367	6.20413		5.39167	93.1608		5.38083	67.8803
		5.262	29.9852		5.26167	5.33544		5.41	96.7735		5.399	70.2551
		5.281	29.8323		5.27967	4.76968		5.42833	93.4332		5.41733	70.9287
		5.2985	27.7367		5.2985	7.00053		5.44633	96.9877		5.4355	70.0296
		5.31683	28.3411		5.31633	5.58235		5.464	95.0139		5.45367	70.7566
		5.33567	29.0602		5.334	6.85267		5.48217	95.1981		5.472	68.2354
		5.35317	29.8056		5.35283	6.39103		5.50133	95.1741		5.4895	69.5577
		5.372	28.813		5.3705	5.55343		5.51967	93.9993		5.5085	67.9279
		5.391	27.7136		5.389	5.98832		5.53767	95.6594		5.52667	69.1702
		5.40817	26.2973		5.40783	5.10841		5.55567	94.1027		5.54517	67.6252
		5.42667	29.3127		5.42533	4.97611		5.57417	94.0773		5.56317	69.0567
		5.44433	27.2406		5.444	5.59753		5.59233	96.5926		5.58133	68.3479
		5.46283	28.6993		5.46167	4.76932		5.6105	94.0246		5.59967	68.0981
		5.482	27.8184		5.4805	5.97458		5.62883	93.8858		5.61783	70.2141
		5.50017	27.6089		5.49867	5.37774		5.647	96.5659		5.63617	70.7132
		5.51783	26.6524		5.51633	5.84154		5.665	92.0254		5.65433	67.4308
		5.53617	27.4261		5.5345	5.07334		5.6835	94.1308		5.6725	66.8816
		5.55433	27.403		5.55333	5.10625		5.70167	95.124		5.69067	68.2821
		5.5725	28.3065		5.571	5.91493		5.71967	95.7121		5.70967	67.8364
		5.59017	27.6576		5.58983	5.66549		5.73883	95.0733		5.7275	70.6913
		5.60833	25.7374		5.60817	5.26603		5.75633	94.1495		5.74533	67.2563
		5.62717	27.8613		5.62633	3.89122		5.77433	93.8651		5.763	69.2107
		5.646	26.2518		5.6445	4.81415		5.79283	94.8871		5.78183	67.2267
		5.66367	26.4387		5.66217	5.23747		5.81117	93.1115		5.80017	68.693
		5.68133	26.2497		5.68033	4.45409		5.829	94.3197		5.81833	68.9442
		5.69983	27.0699		5.6995	5.49595		5.8475	92.3752		5.83583	68.8651
		5.7185	26.4251		5.71767	5.37701		5.86583	95.2001		5.85483	68.694
		5.73667	26.82		5.73583	5.62537		5.88383	92.4219		5.87233	68.315
		5.75483	27.9451		5.75417	4.731		5.90217	95.9758		5.8915	67.9847
		5.773	25.6615		5.77233	5.31483		5.9205	94.4224		5.9095	67.6219
		5.79067	26.709		5.7905	5.1912		5.9385	94.4331		5.92767	66.6933
		5.80983	26.047		5.80933	5.7114		5.95683	95.0419		5.94583	68.8661
		5.82733	27.029		5.82783	4.68798		5.97467	94.7509		5.96417	67.8908
		5.8465	25.8993		5.8455	4.49783		5.99283	95.4104		5.98233	68.7679
		5.86417	25.8542		5.86383	5.44968		6.01167	93.4319		6.00067	67.6796
		5.88183	26.9295		5.882	5.10371		6.02983	94.2389		6.019	66.69
		5.90067	25.1435		5.90083	4.36516		6.04817	92.9279		6.0365	66.2896
		5.91833	27.7608		5.91833	5.37774		6.06633	97.7013		6.05533	69.8418
		5.93733	25.7908		5.93717	6.40513		6.0845	94.4525		6.0735	67.4322
		5.955	25.2026		5.955	5.44931		6.10233	96.2441		6.09183	68.999
		5.973	26.1098		5.97317	6.19112		6.12167	93.0387		6.11	66.6919
		5.9915	25.3142		5.99067	5.19228		6.13967	96.6987		6.12817	68.0486
		6.01017	25.1262		6.00933	4.44071		6.159	93.6695		6.1465	67.6043
		6.02833	25.3718		6.02767	5.33472		6.176	94.3664		6.164	67.7001
		6.047	24.4683		6.04667	3.90388		6.19417	95.1687		6.18367	68.3908
		6.06517	26.2947		6.06367	5.36725		6.21317	95.2001		6.20083	66.9984
		6.083	24.8266		6.0825	4.45771		6.23067	95.142		6.21933	65.7499
		6.10117	26.3958		6.10067	3.84351		6.24933	95.2842		6.2375	67.1157
		6.11883	26.2968		6.119	3.80591		6.2675	93.841		6.25583	66.4988
		6.137	25.2053		6.13683	5.25012		6.28583	94.4224		6.274	66.2333
		6.15583	25.7521		6.15567	4.33696		6.30383	93.2503		6.29233	65.658
		6.1735	25.8134		6.173	4.20827		6.32217	95.4131		6.3105	66.6538
		6.192	25.0832		6.19217	5.20674		6.34033	94.1588		6.328	63.777
		6.21	24.3447		6.21	4.04885		6.358	92.4533		6.347	65.1326
		6.22883	25.2697		6.22767	5.2071		6.3765	93.5387		6.36517	66.0245
		6.24633	25.5201		6.2465	3.64504		6.39467	94.5573		6.38333	66.9388
		6.26467	24.3924		6.26483	4.71293		6.41367	94.3423		6.40167	65.9878
		6.2835	25.2304		6.28317	3.41151		6.43267	95.383		6.41917	66.1289
		6.301	26.0004		6.30117	4.61315		6.44967	93.299		6.43817	66.505
		6.31983	23.5083		6.31917	4.61026		6.46817	94.6114		6.45567	67.7406
		6.33817	25.1655		6.338	4.902		6.4865	92.1776		6.47517	65.6656
		6.35583	24.969		6.35533	4.26538		6.50383	93.3291		6.493	66.7305
		6.3745	24.2415		6.37417	4.23755		6.52333	95.4878		6.51133	66.4116
		6.393	23.7733		6.392	3.8182		6.54167	92.4299		6.5295	67.0523
		6.411	25.6028		6.41	4.26611		6.56	94.1628		6.54783	64.9982
		6.42917	24.241		6.42883	4.16489		6.57817	93.0827		6.566	66.465
		6.448	22.7943		6.44767	4.48121		6.5965	94.6654		6.58417	66.2524
		6.46583	24.3484		6.46533	4.53796		6.61467	95.3083		6.60233	64.3509
		6.48417	23.4669		6.48283	4.45481		6.633	93.6047		6.62067	65.5455
		6.50283	23.2149		6.502	4.95875		6.65117	95.0593		6.63967	66.2591
		6.52133	24.1342		6.52017	4.19272		6.66933	91.2991		6.65767	66.4831
		6.5395	23.5428		6.53817	4.45336		6.68767	92.8197		6.67467	64.8628
		6.55767	24.8957		6.55633	3.22425		6.70567	94.0734		6.6935	65.6437
		6.576	23.4868		6.57467	3.87785		6.72383	92.4533		6.71183	65.6003
		6.594	23.4454		6.5935	5.01804		6.74183	94.2082		6.73067	65.0316
		6.61233	24.6998		6.611	5.36292		6.76067	94.3377		6.74833	66.2576
		6.6305	23.6958		6.62983	4.06403		6.77867	93.245		6.7665	63.9481
		6.6495	23.0945		6.6475	4.72413		6.79717	93.3818		6.785	64.7656
		6.6675	24.1169		6.66583	3.13749		6.81517	92.7363		6.803	63.9619
		6.68567	24.6244		6.68333	3.96425		6.833	92.6903		6.82117	65.6813
		6.704	24.2876		6.70217	4.06836		6.85183	94.614		6.83933	64.1588
		6.7225	22.7928		6.721	3.63094		6.87017	92.3692		6.85767	64.8443
		6.74067	24.9764		6.73867	3.80446		6.88817	93.0888		6.87583	65.1288
		6.75867	22.5408		6.7575	4.08861		6.90667	96.2341		6.894	65.3758
		6.77767	22.6095		6.77567	4.453		6.92467	93.2743		6.91233	66.3468
		6.79567	24.4159		6.79333	4.51265		6.94283	94.2896		6.93083	66.2152
		6.8145	24.2609		6.81167	4.54012		6.961	93.9685		6.949	66.0446
		6.83233	21.1885		6.82917	3.77265		6.97933	92.6335		6.96717	63.6073
		6.85067	21.8547		6.8475	3.75675		6.99817	93.7529		6.9855	66.1771
		6.869	23.4302		6.86633	3.65733		7.01617	92.8731		7.00367	65.2256
		6.88667	22.8787		6.88383	4.57881		7.03433	94.112		7.02183	61.8149
		6.90533	22.732		6.90267	3.76072		7.05217	93.7042		7.04017	65.3991
		6.924	23.5716		6.92167	4.51663		7.0705	93.7075		7.05833	65.0321
		6.94183	22.7954		6.93983	3.83014		7.08983	93.9418		7.07667	65.2985
		6.96	22.8991		6.9575	2.8049		7.10783	95.4124		7.09483	64.2689
		6.97767	23.8204		6.97567	3.93605		7.12617	93.2737		7.11333	63.8904
		6.99583	23.5098		6.9945	3.6877		7.145	93.2022		7.13133	64.1759
		7.014	22.0433		7.01217	4.46891		7.16267	94.8256		7.14917	64.9606
		7.03283	22.8609		7.02967	3.01277		7.1805	91.757		7.168	63.0329
		7.05117	22.2507		7.048	3.99137		7.198	92.6382		7.18633	64.2131
		7.069	22.6707		7.06767	2.74525		7.21733	94.1868		7.2045	63.4695
		7.0875	21.5991		7.08483	5.04623		7.23517	93.6008		7.22267	64.9372
		7.10583	22.2056		7.10317	3.92051		7.25367	91.9119		7.24083	64.5149
		7.124	21.7693		7.12167	4.30949		7.272	91.757		7.25917	65.1308
		7.14283	22.6938		7.13933	3.62769		7.29017	92.2624		7.27733	63.9643
		7.16033	22.7121		7.15783	4.51301		7.30833	94.9304		7.296	62.9747
		7.179	21.4959		7.1765	3.69674		7.32683	92.2924		7.31317	64.1941
		7.19633	21.5802		7.19433	3.23112		7.34467	93.0353		7.33117	62.1376
		7.21517	23.0709		7.21233	3.54527		7.36367	93.4065		7.35033	61.7725
		7.23333	20.7642		7.23133	4.7574		7.38083	91.6776		7.3685	64.174
		7.25167	22.8802		7.24933	4.46927		7.399	93.2256		7.38733	64.2289
		7.26917	22.986		7.267	4.29792		7.41833	89.1063		7.40533	63.9638
		7.288	22.0674		7.28583	3.23943		7.4365	91.7517		7.42317	64.9763
		7.30633	21.9987		7.30333	3.19894		7.4545	91.0401		7.4415	63.7598
		7.324	21.4299		7.322	4.52205		7.4725	93.1482		7.45967	62.9366
		7.34283	20.9318		7.34067	3.96353		7.491	91.8852		7.478	62.3631
		7.361	22.2239		7.35867	3.74988		7.50917	91.6202		7.49617	64.135
		7.37917	21.8055		7.37633	3.51382		7.528	94.3156		7.51433	63.4099
		7.39683	22.6466		7.39517	3.77373		7.54567	92.5067		7.5325	64.6693
		7.415	21.5808		7.41283	3.47225		7.56367	93.4112		7.55083	64.4029
		7.43383	18.677		7.43167	3.86122		7.58167	93.6208		7.569	63.8852
		7.4525	23.0049		7.44983	3.61431		7.60067	92.2877		7.58733	63.8303
		7.47	20.9585		7.468	2.75935		7.61933	91.9199		7.60517	64.4643
		7.48867	21.5839		7.48683	4.26756		7.63717	92.5521		7.624	65.299
		7.50683	21.5541		7.50483	3.19605		7.65583	91.9954		7.64217	64.6722
		7.525	21.2854		7.52267	4.70317		7.674	91.0855		7.6595	62.918
		7.54333	20.0472		7.541	4.12584		7.692	93.5887		7.67867	63.6773
		7.56117	21.0764		7.55917	3.28173		7.7105	93.3104		7.69617	63.4852
		7.58	20.6568		7.5775	3.02217		7.72867	92.3692		7.71517	64.3299
		7.59783	21.5635		7.595	3.26763		7.74667	91.0655		7.73333	63.2054
		7.61667	20.66		7.6135	4.42734		7.76467	91.9399		7.75183	63.1282
		7.63433	20.9124		7.6315	3.3656		7.78333	94.3751		7.7695	61.7725
		7.65267	21.8678		7.65033	4.55531		7.80133	93.6174		7.78833	63.1315
		7.67083	21.1209		7.6685	3.38476		7.81983	94.3177		7.8065	63.551
		7.68917	21.6897		7.68683	3.86158		7.838	93.6788		7.82483	63.0848
		7.70733	20.4515		7.70433	3.06844		7.85617	95.1207		7.843	61.7711
		7.726	21.0963		7.72383	3.81604		7.8745	90.7438		7.86117	62.1934
		7.74383	21.618		7.74117	3.48345		7.89283	90.9974		7.8795	62.5352
		7.76133	20.0294		7.76	2.92131		7.91067	92.8551		7.89767	62.4584
		7.78033	22.336		7.77733	3.12556		7.92917	93.5707		7.91583	62.6105
		7.7985	20.6998		7.79617	3.4144		7.9475	93.2143		7.93417	64.0811
		7.81667	20.6422		7.815	2.5157		7.96467	91.5348		7.95233	62.4847
		7.83433	20.8836		7.83317	3.18087		7.98383	93.4672		7.9705	61.7358
		7.8525	20.7574		7.85083	3.77085		8.00167	92.4706		7.98883	60.6628
		7.87133	19.7418		7.86983	2.84901		8.02067	94.8844		8.007	61.5851
		7.88983	19.5894		7.88733	3.59804		8.03833	92.6115		8.02533	61.8321
		7.90783	20.5369		7.90567	3.16677		8.05667	93.1675		8.0435	61.4298
		7.9265	21.8301		7.92317	3.55792		8.07483	90.9988		8.06167	62.8355
		7.94433	19.8419		7.94267	4.55676		8.0935	90.4474		8.08	61.2362
		7.963	20.9947		7.96083	3.93569		8.11133	89.6677		8.09817	60.6308
		7.98067	19.7544		7.979	2.54535		8.13	91.8111		8.117	62.2783
		7.9995	20.2205		7.99667	3.24124		8.14817	91.2704		8.13467	63.6854
		8.01717	19.9602		8.01567	2.6303		8.16717	93.55		8.15283	62.0418
		8.03567	20.4138		8.03317	3.22208		8.18417	93.012		8.17133	62.457
		8.054	20.0655		8.05133	2.47485		8.20383	91.8371		8.189	61.4483
		8.07217	19.7156		8.06967	3.64721		8.22117	92.6342		8.20783	61.6648
		8.091	20.5547		8.08783	3.44369		8.23917	92.5841		8.22633	61.4708
		8.10867	20.2378		8.1055	2.24132		8.25783	91.7323		8.24433	62.5361
		8.1265	19.9937		8.12417	3.17834		8.27567	92.7356		8.2625	62.0838
		8.1445	19.8617		8.14283	2.7608		8.29383	93.271		8.28067	61.7005
		8.16333	20.8024		8.16033	4.06403		8.31233	92.7877		8.29883	62.0561
		8.18083	19.8419		8.17917	3.25534		8.3305	90.2331		8.31717	62.9957
		8.19917	19.0452		8.1965	2.6979		8.34867	91.1716		8.33533	62.4789
		8.218	20.0252		8.21533	2.42713		8.36717	92.4019		8.35367	60.3243
		8.23683	19.9937		8.233	3.15231		8.38533	93.4873		8.371	61.2038
		8.2545	19.9628		8.25133	4.18947		8.4035	91.486		8.39	61.9813
		8.27267	19.9633		8.271	2.97662		8.42167	91.5147		8.40833	61.9031
		8.29033	18.876		8.28817	2.86673		8.43967	91.223		8.42583	63.2178
		8.30917	21.6143		8.3065	3.44621		8.4585	91.8325		8.44483	63.4919
		8.32667	19.5087		8.325	3.82073		8.47683	92.48		8.46233	63.0166
		8.345	18.8781		8.34267	2.87974		8.495	90.0155		8.48067	61.272
		8.36433	19.4286		8.36083	2.4969		8.51333	91.8919		8.49883	61.8316
		8.38267	19.5302		8.37967	4.11716		8.53083	88.4368		8.51783	62.8937
		8.4005	20.5746		8.3985	3.64287		8.54983	90.5542		8.53633	62.8951
		8.4185	19.5517		8.41617	2.33025		8.56717	90.3112		8.55417	62.17
		8.43617	19.8172		8.435	4.01812		8.58617	94.2703		8.57233	61.0632
		8.455	20.0037		8.45283	3.23908		8.604	91.3312		8.59067	62.1305
		8.4725	18.8739		8.47083	2.94589		8.622	89.9147		8.60883	62.4179
		8.49167	19.1321		8.48883	2.76478		8.6405	92.1582		8.62633	63.2631
		8.50933	17.6907		8.50717	2.7608		8.65883	91.9727		8.64533	63.3389
		8.52817	18.4193		8.5255	3.48417		8.67683	92.0474		8.6635	64.0239
		8.546	19.6559		8.54317	3.61757		8.69517	92.5274		8.68083	63.3966
		8.56433	18.7891		8.56217	3.23943		8.7135	92.1275		8.69983	62.0046
		8.58217	18.7477		8.58083	2.89022		8.73183	93.8611		8.71817	60.9941
		8.60017	21.3728		8.5985	3.15087		8.75	91.8392		8.73583	61.1805
		8.619	19.5663		8.616	3.83375		8.7685	90.8732		8.75467	61.7377
		8.63783	19.0499		8.635	3.05362		8.787	91.6542		8.773	59.7013
		8.656	19.7596		8.65367	2.70187		8.80517	93.0173		8.79117	61.9236
		8.67367	19.3799		8.67133	4.00871		8.82317	90.149		8.80933	60.7023
		8.69133	17.3298		8.689	3.11074		8.8415	91.976		8.8275	62.6825
		8.71017	19.547		8.70817	3.3515		8.86017	92.7156		8.84583	61.7534
		8.72767	18.2292		8.726	2.6744		8.87783	91.3238		8.86467	62.9737
		8.7465	18.5198		8.74433	2.76261		8.89667	91.46		8.8825	63.2817
		8.76417	19.0892		8.7625	3.2857		8.91417	89.4281		8.90067	62.17
		8.7825	19.382		8.78067	3.02		8.93267	90.4447		8.919	62.2096
		8.80133	18.8399		8.799	2.74924		8.95133	89.9387		8.93717	62.0385
		8.82017	18.798		8.81717	2.80454		8.9685	90.5268		8.95483	60.4201
		8.83767	19.2741		8.83517	1.76811		8.98783	91.9954		8.97433	60.5679
		8.85533	18.6848		8.85333	2.6191		9.006	89.9921		8.99183	59.6327
		8.87417	18.9189		8.87183	2.25722		9.02383	92.5875		9.01017	62.5166
		8.89233	17.6682		8.89033	3.88544		9.042	90.7664		9.02833	60.1189
		8.91117	18.0469		8.90833	3.20762		9.06	91.0388		9.04733	62.0433
		8.9285	19.8015		8.926	3.26872		9.0785	91.2451		9.06483	61.0274
		8.94767	16.9752		8.94483	2.55727		9.09717	91.4059		9.083	62.0232
		8.96533	17.4739		8.96233	3.47007		9.116	90.5181		9.10133	62.8617
		8.9835	17.5954		8.98133	2.35664		9.13417	91.6289		9.1195	62.191
		9.00183	19.0295		9.00017	2.24276		9.15133	90.9801		9.13783	60.0736
		9.02	19.5883		9.01767	3.1411		9.16983	90.5762		9.1565	61.6795
		9.03783	18.5052		9.036	2.79262		9.1885	90.8179		9.17383	58.9324
		9.057	17.18		9.05417	2.93504		9.20667	92.3945		9.19267	60.1298
		9.075	17.2246		9.07183	3.10749		9.225	94.2142		9.21083	59.0249
		9.09233	17.4283		9.09067	2.29808		9.24317	90.0776		9.2295	57.9619
		9.11117	17.2785		9.10883	2.71959		9.2615	92.0214		9.24667	60.4144
		9.12933	18.8577		9.12767	2.55945		9.28033	90.9487		9.2655	59.6932
		9.147	17.2424		9.14517	3.268		9.29783	93.544		9.28317	60.9521
		9.16633	16.6374		9.16433	2.47088		9.31517	91.189		9.302	60.4025
		9.18417	18.6728		9.182	1.71967		9.33467	90.9026		9.32033	60.362
		9.203	17.2204		9.20017	2.67838		9.35233	87.517		9.33783	60.7219
		9.2205	18.248		9.2185	2.71453		9.37083	88.5556		9.35683	57.9619
		9.23817	17.0952		9.23717	2.69356		9.3885	92.3465		9.375	61.1819
		9.257	18.0484		9.2555	2.58656		9.4065	91.5114		9.393	59.8896
		9.27517	16.1723		9.27283	1.72076		9.4255	90.3953		9.41067	59.0454
		9.294	17.642		9.29083	2.46147		9.44317	92.4279		9.42967	60.361
		9.31217	17.7923		9.30917	3.21232		9.46217	90.3446		9.44783	58.5911
		9.32983	17.5781		9.32783	2.32808		9.48017	90.6343		9.466	60.228
		9.3475	17.0522		9.346	2.38339		9.49833	90.398		9.48367	58.6459
		9.366	16.7626		9.36483	3.18195		9.51567	91.8071		9.5025	59.0406
		9.3845	16.9082		9.383	2.67513		9.53483	91.2197		9.52117	60.8806
		9.40217	16.6353		9.40083	1.9673		9.55317	93.4092		9.539	59.5583
		9.421	17.3833		9.419	2.66211		9.5715	93.7276		9.5575	58.951
		9.43933	17.4157		9.43667	2.09563		9.58933	91.9647		9.57567	59.4472
		9.4575	18.9582		9.45483	2.95276		9.608	89.2752		9.594	59.1007
		9.47517	18.0799		9.47367	3.71915		9.62633	94.323		9.61217	58.5716
		9.49367	17.476		9.49133	2.77888		9.6445	88.9521		9.63033	59.5278
		9.5125	17.7462		9.51067	2.27096		9.66267	91.3792		9.64867	60.2299
		9.53033	17.0999		9.529	2.22686		9.681	92.9559		9.66683	59.8367
		9.548	17.1837		9.546	2.82443		9.69917	90.4233		9.68517	58.9295
		9.5665	17.4733		9.56483	3.27775		9.7175	91.4874		9.70333	59.4644
		9.585	16.7657		9.583	1.91163		9.73567	91.3178		9.72117	60.1532
		9.60333	17.7672		9.6015	2.11154		9.75383	90.7658		9.74	56.8579
		9.622	16.5971		9.62033	2.16793		9.77217	91.47		9.75833	57.6759
		9.64033	16.2807		9.63783	1.17127		9.79033	93.6241		9.77633	58.4386
		9.658	17.641		9.6565	2.19685		9.8085	90.9353		9.795	59.4091
		9.67633	17.1837		9.6745	2.6162		9.82667	90.5562		9.813	58.8175
		9.6945	16.386		9.692	1.16621		9.845	89.6917		9.83117	58.8328
		9.71267	17.224		9.71083	2.35628		9.86317	91.1963		9.84967	57.7474
		9.73033	16.3258		9.72983	2.76225		9.8815	89.4034		9.86817	58.1864
		9.7485	17.5813		9.74733	2.64223		9.89967	88.8707		9.88617	59.7523
		9.76733	16.783		9.7655	2.91842		9.918	91.8311		9.90433	59.9239
		9.78533	16.9564		9.78383	2.6603		9.93617	90.131		9.9225	59.2156
		9.80417	16.365		9.802	2.48497		9.95433	90.6303		9.94083	58.3589
		9.82133	16.3687		9.82033	2.3899		9.97267	91.6489		9.959	61.5594
		9.83967	15.6763		9.83783	1.51867		9.99083	90.4554		9.97733	58.3208
		9.8585	17.3728		9.85617	3.03627		10.0092	93.4893		9.99467	58.0505
		9.87733	17.1402		9.87483	2.94698		10.0273	91.3772		10.0137	59.3538
		9.895	17.2471		9.89317	1.64737		10.0455	91.7911		10.032	58.4228
		9.91283	16.949		9.91083	2.357		10.0637	92.1302		10.0502	55.8983
		9.93133	16.3891		9.92967	3.3403		10.0818	91.757		10.0685	58.7003
		9.94967	16.8244		9.94717	2.54679		10.1	89.4027		10.0867	58.459
		9.96717	14.9451		9.9655	1.92537		10.1182	91.1957		10.1048	57.9614
		9.9855	15.7999		9.98433	1.66544		10.137	89.7805		10.1225	57.4256
		10.0043	16.3462		10.0023	2.49257		10.1552	89.7725		10.1413	57.3079
		10.022	15.7627		10.0207	2.90974		10.1733	91.3525		10.1595	57.5395
		10.0402	16.4693		10.039	1.88379		10.1912	89.888		10.178	57.5014
		10.0592	17.1423		10.0572	1.37588		10.2098	89.4788		10.1963	58.8509
		10.0775	16.4667		10.0748	3.20798		10.228	88.2813		10.2143	56.5151
		10.0948	17.0308		10.0937	2.54571		10.2465	89.0616		10.2327	58.4924
		10.1137	15.4814		10.1113	2.06346		10.2638	89.4581		10.2513	57.2754
		10.1313	16.7673		10.1295	1.42034		10.2827	90.3145		10.269	57.4642
		10.1495	15.373		10.1483	1.70629		10.3007	90.0469		10.2877	55.6461
		10.1683	15.4678		10.1665	2.19866		10.3192	89.7511		10.3058	58.6626
		10.1872	16.8019		10.1853	2.10937		10.3372	92.4806		10.3242	58.6616
		10.2048	14.4826		10.2027	2.98385		10.3555	92.1275		10.3423	57.0614
		10.2225	16.827		10.2212	1.89789		10.3738	90.2324		10.3597	56.742
		10.2413	15.8627		10.2393	2.14154		10.392	92.5567		10.379	57.6925
		10.2588	16.4876		10.2578	2.10829		10.4102	89.864		10.3973	59.6937
		10.2777	15.0059		10.2763	1.20055		10.4285	88.4201		10.4155	58.3008
		10.2957	16.0042		10.2947	2.90576		10.4465	92.6662		10.4337	57.5772
		10.3145	14.8147		10.3118	2.77309		10.4652	90.3439		10.452	58.3227
		10.3325	16.176		10.3303	2.47485		10.4832	88.0143		10.47	58.6607
		10.3507	15.5705		10.3487	2.13721		10.5015	89.8526		10.4875	57.1639
		10.3688	16.4646		10.3665	2.43364		10.5197	87.5583		10.5065	58.3332
		10.3872	16.2425		10.3852	2.71923		10.5378	90.2071		10.5248	57.1996
		10.4047	14.2909		10.4032	2.44665		10.556	90.8726		10.5422	57.2178
		10.4235	15.2127		10.4225	2.12311		10.5743	89.7825		10.5613	58.644
		10.4425	15.858		10.4402	2.63138		10.5922	90.7057		10.5797	56.0532
		10.46	16.2744		10.4577	2.35772		10.6108	89.91		10.5978	56.241
		10.4782	16.7149		10.4763	2.28904		10.629	88.6518		10.616	56.6987
		10.4965	15.9675		10.4948	2.08189		10.6475	89.7738		10.6343	57.5615
		10.5147	14.8513		10.5127	2.28687		10.6655	89.0035		10.6518	59.0087
		10.533	15.8224		10.531	2.3429		10.6837	88.3948		10.6707	58.3775
		10.5505	15.615		10.5492	1.42757		10.7018	88.577		10.689	56.2987
		10.5697	14.2474		10.5682	2.83455		10.7202	89.7812		10.7072	57.3102
		10.5878	15.5914		10.5863	2.59451		10.7375	89.6443		10.7253	56.3597
		10.6058	14.459		10.604	2.08334		10.7565	90.7965		10.7437	58.9129
		10.6235	14.8519		10.6228	1.92501		10.7753	90.5842		10.7623	56.6391
		10.6425	14.855		10.6403	1.79161		10.7933	88.2259		10.7803	57.764
		10.6608	14.4727		10.6587	2.24204		10.8115	89.7812		10.7985	58.9667
		10.6793	15.3212		10.6772	1.88343		10.8297	89.356		10.8168	57.1377
		10.697	14.6879		10.695	2.98023		10.8478	92.5027		10.835	57.6892
		10.7147	15.0671		10.7133	1.96694		10.8657	91.0822		10.8533	55.9946
		10.734	15.2761		10.732	1.57868		10.8848	88.7058		10.8715	57.0848
		10.752	15.4794		10.7497	2.19577		10.903	89.1657		10.89	56.4718
		10.7702	14.5428		10.768	2.64621		10.921	88.6564		10.908	56.3926
		10.7875	14.3758		10.7862	1.13331		10.9385	90.0495		10.926	55.6113
		10.806	13.8049		10.8047	1.50529		10.9577	91.468		10.9445	57.193
		10.8248	14.4795		10.823	1.81655		10.9758	90.3613		10.9627	57.1925
		10.8428	14.5256		10.8403	2.70549		10.9943	91.0088		10.9808	57.2321
		10.8603	14.9739		10.8593	2.15745		11.0127	88.9835		10.9992	57.1177
		10.8792	15.3552		10.8777	1.28261		11.0308	87.9375		11.0173	57.1424
		10.8978	15.7978		10.8962	1.67557		11.049	88.816		11.0355	57.8036
		10.9157	15.1525		10.9145	1.57615		11.0675	89.8079		11.0538	58.2579
		10.934	14.546		10.9315	1.8339		11.0858	89.3526		11.0725	55.977
		10.9515	15.5663		10.9502	2.28434		11.104	89.2992		11.0902	55.311
		10.9698	13.9756		10.9688	1.11306		11.1222	89.0883		11.1085	56.0232
		10.9887	14.4554		10.9868	1.63616		11.1405	90.1296		11.1267	56.8173
		11.0075	12.8322		11.0057	1.99405		11.1585	89.4047		11.1448	57.0466
		11.0255	16.2571		11.0235	1.90693		11.1768	88.3887		11.1632	57.5772
		11.0435	15.5265		11.0413	2.07142		11.1952	89.3787		11.1813	56.7968
		11.0615	13.6351		11.06	2.62162		11.2133	91.8091		11.1998	55.1347
		11.0798	13.9489		11.0778	1.36106		11.2315	87.1371		11.2178	55.2524
		11.0973	15.9047		11.0962	2.03707		11.2498	89.9708		11.236	57.5371
		11.1162	14.0185		11.1143	2.03634		11.2678	86.6285		11.2543	57.0233
		11.1345	14.228		11.1327	1.69256		11.2863	90.5555		11.2718	56.1643
		11.1532	14.9996		11.1512	2.11009		11.3045	89.115		11.2907	56.1233
		11.1708	14.8168		11.169	2.31398		11.3227	89.9167		11.309	55.1742
		11.1892	15.5239		11.1872	1.85198		11.341	90.0522		11.3272	55.6342
		11.2073	14.7099		11.205	2.04285		11.3592	90.8719		11.3455	56.5695
		11.225	14.3705		11.2232	1.81944		11.3773	89.141		11.3637	56.436
		11.2443	14.6738		11.2423	1.88343		11.3957	90.6022		11.3818	54.4301
		11.2627	14.0159		11.2602	1.58953		11.4138	87.6191		11.3995	55.5932
		11.2797	14.5785		11.2783	1.33033		11.432	90.6863		11.4187	57.2354
		11.2988	15.0069		11.2967	2.6133		11.4503	88.9241		11.4368	54.944
		11.3163	15.1069		11.3155	1.05739		11.4685	88.6311		11.4553	56.1633
		11.3352	12.9511		11.3333	2.45569		11.4868	88.4515		11.4733	55.4984
		11.3532	15.2976		11.3515	2.41485		11.5052	87.5049		11.4915	55.1375
		11.372	14.7733		11.3695	1.51795		11.5235	90.2044		11.5098	56.4322
		11.3897	13.2036		11.388	1.92825		11.5415	88.9755		11.528	57.1744
		11.4078	14.0756		11.4063	2.37002		11.5603	87.9622		11.5463	54.7743
		11.4262	12.927		11.4248	1.31731		11.5785	89.4928		11.5647	55.8811
		11.4443	13.829		11.4425	2.5439		11.5967	88.5269		11.583	56.068
		11.462	14.1877		11.4613	1.92283		11.6152	87.9328		11.6012	55.077
		11.4802	14.3438		11.4785	3.07676		11.6327	89.6777		11.6193	55.9784
		11.499	14.0767		11.4977	1.37226		11.6507	87.7259		11.6377	56.4722
		11.5167	13.4482		11.5153	2.36748		11.6687	89.3046		11.6558	54.0645
		11.5355	14.1883		11.534	1.97634		11.6878	90.7084		11.674	53.8209
		11.5537	15.0886		11.5513	1.3437		11.706	90.8759		11.6923	54.0102
		11.5713	12.8642		11.57	2.16938		11.724	89.8586		11.7107	54.1474
		11.5908	14.0212		11.5883	2.51245		11.7417	88.5563		11.7293	55.4416
		11.6083	14.1406		11.6067	0.996299		11.7608	90.0976		11.7472	55.7896
		11.626	13.4529		11.625	1.40335		11.779	90.2571		11.7655	55.9031
		11.6448	14.6507		11.6438	2.3006		11.7972	89.2959		11.783	54.4344
		11.6637	13.6807		11.6617	2.7167		11.8153	90.0168		11.8022	57.7674
		11.6813	15.2348		11.68	1.51614		11.8333	88.1464		11.8202	56.1662
		11.6988	13.455		11.6985	1.84872		11.8517	89.346		11.8383	56.1085
		11.7177	10.8146		11.716	2.09599		11.8702	88.842		11.8568	55.5789
		11.7353	12.8825		11.7343	1.6076		11.8883	87.9375		11.875	55.0617
		11.7542	13.5314		11.7527	1.8227		11.9065	87.2446		11.8933	57.5996
		11.7727	12.3074		11.7712	2.40363		11.9248	87.4849		11.9115	55.4445
		11.7903	11.4542		11.7897	2.5439		11.9428	87.3748		11.9297	55.5579
		11.8092	11.7375		11.8073	1.47674		11.9612	89.0769		11.948	55.4235
		11.8265	11.0598		11.8255	1.41528		11.9795	90.3679		11.9668	55.5904
		11.8453	11.3138		11.8443	1.98465		11.9982	88.7739		11.9835	54.1822
		11.8635	13.312		11.8623	1.63219		12.0158	88.7913		12.0033	55.9026
		11.8818	14.0636		11.8802	2.21131		12.0347	88.7706		12.0208	54.9993
		11.9	13.137		11.8985	1.08559		12.0528	88.7412		12.039	55.0226
		11.9177	13.8682		11.9167	1.90656		12.0717	89.4087		12.0573	55.1752
		11.9358	13.8693		11.9355	1.47674		12.0892	89.5903		12.0755	54.8296
		11.9547	13.598		11.953	1.8809		12.1075	89.9908		12.0938	55.7462
		11.973	12.9899		11.9717	1.16873		12.1258	88.7238		12.112	54.8658
		11.9912	13.9552		11.9895	1.9391		12.144	89.89		12.1302	53.5568
		12.0095	12.9045		12.0077	1.37226		12.1623	89.2745		12.1485	55.2667
		12.0273	14.1589		12.0267	2.43074		12.1813	91.0882		12.1667	53.6898
		12.0458	14.5863		12.0443	1.20236		12.199	87.6698		12.1848	56.3345
		12.064	12.5059		12.0627	1.85595		12.2172	87.8574		12.2032	53.8976
		12.0817	13.5136		12.0807	2.00706		12.2355	91.1917		12.2213	56.3597
		12.1005	14.1055		12.0995	2.30133		12.2537	88.3714		12.2397	55.2295
		12.1188	14.5203		12.1175	1.95393		12.2718	90.0182		12.2578	54.873
		12.1363	12.7201		12.136	1.08703		12.2902	89.934		12.2767	55.7071
		12.1552	14.4376		12.154	2.60174		12.3083	89.7845		12.2948	54.3934
		12.1728	12.3844		12.1718	2.35628		12.3272	89.7278		12.313	55.0221
		12.191	14.0631		12.19	2.18311		12.345	88.1818		12.3307	54.0302
		12.2098	14.4774		12.2085	2.31506		12.3638	90.1764		12.349	54.9302
		12.2275	14.8791		12.2265	1.60435		12.3813	90.3139		12.3675	53.7284
		12.2463	13.4105		12.2453	1.86318		12.3997	88.302		12.3853	54.8458
		12.264	14.2679		12.2627	1.48795		12.4185	88.332		12.4037	53.2641
		12.283	12.7437		12.2807	0.692635		12.4358	86.9529		12.4218	53.8157
		12.3005	14.1432		12.2997	1.92501		12.4543	87.6999		12.4402	54.5226
		12.3193	13.8101		12.3177	2.50449		12.4728	90.7711		12.4585	53.819
		12.3375	14.0536		12.336	1.43046		12.4912	89.2138		12.4767	55.0422
		12.3558	14.2878		12.3547	1.28912		12.5095	89.5876		12.495	53.307
		12.3733	13.1135		12.3723	1.08595		12.5277	87.7032		12.5135	54.0869
		12.3922	12.53		12.3907	2.03634		12.5458	88.0136		12.5315	55.3654
		12.4103	13.7865		12.4093	1.78329		12.5638	87.7759		12.5497	53.8586
		12.4287	12.6326		12.427	1.11415		12.5823	88.3126		12.5682	53.818
		12.4462	13.3167		12.4455	1.11631		12.6005	88.4448		12.5862	54.6074
		12.4652	13.0119		12.463	2.28614		12.6187	91.3258		12.6047	53.1559
		12.4833	13.9347		12.482	1.36106		12.6375	88.4455		12.6227	54.699
		12.501	13.158		12.4993	2.05406		12.6555	87.9061		12.6408	54.6193
		12.5192	12.1293		12.5185	0.852777		12.673	89.4895		12.6583	53.5902
		12.5385	14.0154		12.5358	2.00706		12.6918	89.0609		12.6773	52.9676
		12.5568	13.8677		12.5552	1.37696		12.7102	90.6036		12.6962	54.7542
		12.5745	12.9081		12.5735	1.9673		12.7283	88.3634		12.7137	55.3067
		12.5927	12.8212		12.591	2.13685		12.747	89.6717		12.7312	55.6495
		12.6103	12.5295		12.6097	1.1991		12.7653	89.9915		12.7502	54.4654
		12.6292	15.5899		12.6277	2.0649		12.7833	89.0262		12.7685	53.7089
		12.6475	11.8014		12.6463	0.965211		12.8015	89.6744		12.7867	55.0965
		12.665	12.6368		12.664	0.709623		12.8198	92.1055		12.805	54.8915
		12.6832	12.7379		12.6822	0.809396		12.838	88.577		12.8223	54.4859
		12.702	13.1962		12.7008	1.60543		12.8562	87.9328		12.8405	53.5897
		12.7203	12.3975		12.7182	1.59242		12.875	91.44		12.8602	54.3524
		12.7378	12.5336		12.7372	2.00815		12.8923	88.2599		12.877	53.9915
		12.7567	12.9872		12.7552	0.940986		12.9112	87.4309		12.896	53.9177
		12.775	12.465		12.7733	0.53538		12.93	87.5824		12.9143	53.5382
		12.7932	12.8244		12.7917	1.40082		12.9477	87.4042		12.9325	52.1778
		12.8108	12.4609		12.8098	1.69762		12.9658	87.2673		12.9507	53.5497
		12.8297	13.3848		12.8287	2.51751		12.9847	86.2527		12.9682	53.7446
		12.8478	11.7972		12.8465	1.43191		13.0027	88.571		12.9872	54.2966
		12.8655	12.9469		12.865	1.8603		13.0208	89.0549		13.006	53.5354
		12.8843	12.7196		12.883	1.32924		13.039	87.5049		13.0237	52.5458
		12.902	12.8642		12.901	1.96332		13.0575	86.9736		13.0418	53.0954
		12.9202	13.1376		12.9195	1.41817		13.0758	87.5944		13.06	53.8995
		12.939	13.2182		12.9377	2.03707		13.094	87.0884		13.0775	53.8095
		12.958	12.6138		12.9557	2.03743		13.1122	90.5562		13.0967	53.6688
		12.9755	11.8313		12.9738	1.31804		13.1305	88.9768		13.1143	53.9339
		12.993	10.8743		12.9927	1.50855		13.1483	86.4202		13.1333	52.2397
		13.012	11.2572		13.0108	0.956173		13.1668	88.5536		13.1513	53.4948
		13.0302	13.2418		13.0287	1.38744		13.1853	88.7125		13.1695	52.1396
		13.0483	12.2843		13.0468	1.52048		13.2035	87.7519		13.1878	54.0678
		13.066	13.0333		13.065	1.99839		13.2215	88.4728		13.206	52.183
		13.0853	13.3696		13.0838	1.63219		13.2408	87.5597		13.2237	53.0573
		13.103	12.7353		13.1015	1.70666		13.2592	89.7278		13.243	53.2341
		13.1213	13.6		13.1197	2.00815		13.2763	88.2332		13.26	52.4676
		13.1395	11.143		13.1382	1.60941		13.2948	87.3227		13.2788	53.7809
		13.1578	11.4154		13.1567	1.70774		13.3123	87.4021		13.2972	54.4034
		13.176	11.4573		13.1747	1.7645		13.3312	87.2666		13.3145	53.839
		13.1938	11.4819		13.1927	1.57507		13.3493	86.4636		13.333	55.4836
		13.2127	11.0205		13.2113	1.19946		13.3673	87.8254		13.3518	53.6474
		13.2307	12.1701		13.2292	0.996659		13.3857	87.3988		13.37	52.6564
		13.2483	12.0188		13.2477	2.80599		13.4042	86.7333		13.3882	52.315
		13.2672	12.5834		13.2662	1.52698		13.4222	89.5909		13.4068	54.2409
		13.2848	10.7696		13.2837	0.842299		13.441	88.7686		13.4247	53.1931
		13.3037	13.3706		13.302	1.85234		13.4595	87.1104		13.4425	53.7237
		13.3212	12.4268		13.3202	1.89644		13.4763	86.4423		13.4612	52.51
		13.34	12.5944		13.3387	2.68814		13.4955	87.0524		13.4788	51.9185
		13.359	11.7333		13.3567	1.18681		13.5137	89.0249		13.4982	51.1167
		13.3765	12.0298		13.3752	2.18637		13.5325	85.8315		13.5158	52.1821
		13.3947	13.3434		13.3927	1.71895		13.5502	87.7272		13.5335	52.6406
		13.413	10.9859		13.4115	1.13114		13.5682	88.7946		13.5523	52.6254
		13.4305	12.6787		13.4295	1.95356		13.5873	89.1577		13.5705	52.2364
		13.4493	11.7936		13.4475	0.69589		13.6048	85.1012		13.5878	51.7426
		13.467	11.5401		13.4657	1.37588		13.6237	86.6872		13.607	53.1192
		13.4862	12.3226		13.484	0.593941		13.641	92.0534		13.6252	52.6382
		13.5042	12.0659		13.5028	1.01329		13.6592	87.7192		13.6435	53.2146
		13.5217	11.6097		13.521	1.50132		13.6787	85.7193		13.6608	53.8056
		13.54	12.2142		13.5395	1.99441		13.6967	85.8809		13.6798	51.7407
		13.5588	11.2892		13.5567	1.15789		13.7145	85.6686		13.6982	51.3007
		13.577	11.7354		13.5753	2.11154		13.7328	86.232		13.7163	51.6486
		13.5958	11.4416		13.5943	0.881337		13.751	88.1551		13.7352	53.9372
		13.6135	11.3777		13.6113	1.96694		13.7692	87.3714		13.7528	52.5963
		13.6317	11.8617		13.6303	2.126		13.7878	85.8228		13.7702	52.777
		13.6498	10.8335		13.6487	1.30032		13.806	88.8413		13.7895	51.4894
		13.6682	11.9413		13.6672	1.04185		13.824	87.3768		13.808	52.8289
		13.6857	11.1294		13.6848	1.40299		13.8425	86.8695		13.8263	51.897
		13.7047	11.5903		13.7033	0.408853		13.8613	88.1491		13.8448	51.8407
		13.7233	11.7569		13.721	1.23308		13.8792	89.3727		13.8627	52.1058
		13.741	12.1733		13.7397	0.595749		13.8968	89.2211		13.8808	53.1159
		13.7593	10.7319		13.7577	0.727338		13.9157	88.1731		13.8992	52.2764
		13.7768	11.8218		13.776	1.34262		13.9338	86.3902		13.9173	52.1992
		13.7957	11.4222		13.7938	1.20055		13.9518	86.3334		13.9358	52.2812
		13.8133	11.5217		13.8122	1.91091		13.9698	87.3801		13.9538	50.6095
		13.8315	11.0828		13.83	1.40335		13.9885	86.6011		13.972	49.7753
		13.8505	11.5668		13.8487	0.985814		14.0067	86.8147		13.9895	52.5844
		13.868	12.2367		13.867	1.6076		14.0243	87.268		14.0088	49.9497
		13.8872	10.9005		13.8857	2.08081		14.0432	89.41		14.0262	52.6382
		13.9053	11.1865		13.903	1.33105		14.0617	86.794		14.045	52.2274
		13.9227	11.2169		13.922	0.362578		14.0797	87.7285		14.0632	51.7621
		13.9415	10.7476		13.9402	1.22983		14.0978	86.7386		14.0815	50.9627
		13.9592	10.7303		13.9585	1.18355		14.1163	86.254		14.0997	54.412
		13.978	12.2084		13.9767	1.46191		14.1345	88.3387		14.1185	51.3779
		13.9957	11.3012		13.9945	1.25513		14.1528	86.284		14.1365	51.6305
		14.0148	10.8131		14.0128	1.89789		14.171	88.9495		14.1543	53.3047
		14.0323	10.305		14.0317	2.03779		14.1893	89.1904		14.1725	52.9071
		14.0508	11.1216		14.0493	0.736735		14.2075	85.1099		14.1908	50.9994
		14.0692	9.94884		14.0678	0.969546		14.2258	85.8562		14.2082	52.4161
		14.0868	9.8069		14.0863	0.799639		14.244	88.5723		14.2272	52.4852
		14.1058	12.486		14.1043	1.28695		14.2622	88.7999		14.2455	50.6529
		14.1238	10.8707		14.1228	0.160495		14.2807	88.1471		14.2637	51.6677
		14.1428	11.0184		14.1405	0.73927		14.2987	87.0817		14.2818	52.2736
		14.16	11.2337		14.1587	0.622141		14.3162	85.1419		14.3005	50.7892
		14.1782	11.0184		14.1772	0.5061		14.3348	86.8114		14.3187	51.2444
		14.197	10.5381		14.195	1.93693		14.3533	87.1358		14.3368	52.2984
		14.215	11.2321		14.2128	1.0986		14.3715	88.1271		14.3557	52.1658
		14.2327	11.3599		14.2322	1.09716		14.3897	87.0043		14.3733	52.5653
		14.2515	10.9361		14.2503	1.54543		14.408	88.7445		14.3917	51.0228
		14.27	10.161		14.268	1.76486		14.4262	86.5744		14.4098	52.5448
		14.2882	11.6474		14.2865	1.37334		14.4445	89.5602		14.4287	51.9871
		14.3062	9.53402		14.3045	1.40299		14.4632	87.6758		14.4463	54.4149
		14.3237	11.2672		14.3227	0.579481		14.481	88.2012		14.4647	51.3646
		14.342	10.4988		14.3413	1.05667		14.4992	85.991		14.4818	51.0175
		14.3608	11.6956		14.3595	1.21682		14.5173	86.732		14.5002	52.868
		14.3787	10.5166		14.3772	1.35564		14.5348	86.0431		14.5192	52.0457
		14.3975	10.0635		14.3957	0.582016		14.5537	89.8573		14.5365	50.8478
		14.4152	9.68224		14.4145	1.40588		14.572	87.7519		14.5557	53.0935
		14.4337	11.3127		14.432	1.91994		14.5898	85.4176		14.5738	52.2388
		14.4513	11.3971		14.4502	1.14162		14.6085	86.5437		14.5922	51.5157
		14.4702	10.1447		14.468	0.622141		14.6267	86.2447		14.6095	50.3073
		14.489	11.4458		14.4868	0.639489		14.645	88.4388		14.629	52.787
		14.5067	11.2871		14.505	1.30141		14.663	87.2646		14.6468	51.1181
		14.5242	11.2719		14.5227	0.538635		14.681	85.3789		14.6655	51.9165
		14.5433	10.206		14.5418	1.28948		14.6997	89.9641		14.6832	51.6672
		14.5615	10.0793		14.5597	0.90014		14.718	84.5418		14.7018	51.8961
		14.5798	9.71943		14.5782	0.755171		14.7365	87.9916		14.7197	50.4264
		14.598	10.1646		14.5965	2.11154		14.7543	86.2947		14.737	51.457
		14.6163	10.8345		14.6147	1.63652		14.7728	86.6525		14.7562	51.6496
		14.6345	10.1405		14.6327	1.29562		14.7912	86.7413		14.7735	52.9362
		14.6527	9.9986		14.6508	0.867604		14.8093	85.6392		14.7927	50.2143
		14.6703	8.87144		14.6692	1.92066		14.8268	85.5357		14.8115	50.3854
		14.6892	11.3316		14.687	0.634067		14.8458	88.2012		14.8292	51.2478
		14.708	9.55182		14.7057	0.996659		14.8645	86.2827		14.8473	50.3158
		14.7257	8.58861		14.724	1.48939		14.8825	85.7954		14.8655	50.312
		14.7443	9.95303		14.7425	1.11523		14.9007	89.139		14.8843	51.2892
		14.7627	9.74352		14.7597	1.20272		14.9188	86.3101		14.9022	51.4928
		14.7803	11.7799		14.7787	1.54651		14.9375	88.9328		14.9205	51.2115
		14.7985	10.5816		14.7967	0.90737		14.9553	86.0471		14.9383	49.3391
		14.8168	11.9617		14.8155	0.159055		14.974	86.1205		14.9575	52.0257
		14.835	10.8534		14.8332	1.5165		14.9918	87.7773		14.9752	52.7341
		14.8538	11.903		14.852	0.0744615		15.0098	86.6252		14.9933	52.0496
		14.8713	10.2699		14.8702	0.619246		15.0277	87.5683		15.011	50.0455
		14.89	10.6947		14.8878	1.21175		15.0472	85.9863		15.0293	49.9736
		14.9073	9.92999		14.906	1.15898		15.0648	86.523		15.048	49.5136
		14.9262	10.7062		14.9237	1.92789		15.0837	86.76		15.0663	52.3136
		14.9443	10.3757		14.943	0.955806		15.1012	86.282		15.0848	51.5495
		14.962	9.43031		14.9602	0.898692		15.1193	85.9029		15.1023	52.5296
		14.9813	10.811		14.9785	1.41672		15.1373	86.0357		15.121	51.1519
		14.9992	11.0875		14.9975	1.99477		15.156	84.9243		15.1392	51.8569
		15.0167	10.9194		15.016	0.608401		15.1742	87.1879		15.1575	50.2953
		15.0362	10.0777		15.0337	1.2038		15.1923	87.1605		15.1763	50.4827
		15.0533	10.1824		15.0515	0.286662		15.2105	86.4643		15.1938	51.6672
		15.072	11.0865		15.07	1.46264		15.2288	88.1725		15.2122	50.2205
		15.0902	10.0185		15.0887	1.22838		15.247	88.5196		15.2303	50.8612
		15.1083	10.7659		15.1068	1.47493		15.2643	87.4008		15.2492	50.6815
		15.1272	9.72624		15.1242	0.695162		15.2835	86.0324		15.2662	51.7464
		15.1448	9.62515		15.1428	0.51441		15.3017	86.7306		15.285	51.0142
		15.1637	10.8345		15.1612	-0.649635		15.319	87.3147		15.3033	52.2359
		15.1813	10.5161		15.18	0.911705		15.3382	85.8308		15.3215	50.6633
		15.1995	11.4405		15.1983	1.48758		15.3563	87.83		15.3398	50.0088
		15.2178	9.46802		15.2158	1.01509		15.3747	84.2247		15.3578	51.9185
		15.2353	9.1789		15.2347	1.18681		15.392	84.7427		15.3765	49.4769
		15.2537	8.18949		15.2523	0.0834991		15.411	87.3681		15.394	50.5794
		15.2723	10.1007		15.2708	0.841572		15.4295	85.9323		15.4133	50.7129
		15.2912	9.5691		15.2887	0.589246		15.4478	86.6078		15.4308	51.1477
		15.309	9.66338		15.307	0.840124		15.4668	87.294		15.449	50.5251
		15.3272	10.184		15.325	1.31623		15.4843	87.4302		15.4673	51.8141
		15.3455	9.83099		15.3435	0.634067		15.5023	86.523		15.4852	52.029
		15.3637	11.7323		15.3623	0.851337		15.5207	87.4082		15.5043	48.0025
		15.3812	9.70371		15.3807	0.333298		15.5395	85.7		15.5212	51.039
		15.4	9.44655		15.3982	1.09716		15.5575	87.2433		15.5408	49.413
		15.4183	10.3532		15.4163	0.575866		15.5757	86.2834		15.5585	50.8836
		15.4365	10.6276		15.4352	1.54867		15.5942	86.2774		15.577	50.7882
		15.4547	9.61467		15.4525	0.130495		15.6122	85.9837		15.595	50.9575
		15.473	9.93103		15.471	0.679622		15.6307	84.6546		15.6132	50.67
		15.4912	10.1992		15.4893	1.3878		15.6487	87.7539		15.6313	51.324
		15.5088	11.0226		15.5073	1.70521		15.667	84.7648		15.6498	50.5766
		15.5277	10.6643		15.5263	0.997746		15.685	86.9215		15.6678	50.9851
		15.5467	9.16161		15.544	1.02739		15.7032	85.6399		15.6862	49.9836
		15.5642	10.1028		15.5623	0.53502		15.7213	86.9202		15.7048	51.5309
		15.5823	9.33864		15.581	1.34009		15.739	84.2781		15.7225	51.4041
		15.6005	10.1044		15.5982	0.494527		15.758	85.9156		15.7402	50.4636
		15.6185	9.51568		15.6173	0.69589		15.7758	83.419		15.7583	50.7348
		15.6372	9.68014		15.635	0.724083		15.7943	86.5738		15.7772	51.0347
		15.6555	9.66234		15.6528	1.76558		15.8132	87.1318		15.7955	51.4551
		15.6735	9.93365		15.6718	0.348845		15.8307	86.0691		15.8132	51.0142
		15.6918	9.31036		15.6898	0.894717		15.8487	84.8462		15.8317	49.9903
		15.7093	8.65617		15.7082	0.549113		15.8677	85.3983		15.8502	50.5403
		15.7282	9.53611		15.7265	0.17026		15.8858	86.27		15.868	51.438
		15.7458	9.36222		15.7448	-0.27331		15.904	85.8528		15.8872	49.6247
		15.7647	8.4849		15.7627	1.18247		15.9222	86.272		15.905	51.2287
		15.7828	9.44864		15.7813	0.364746		15.9408	85.0745		15.9233	50.5604
		15.801	9.96193		15.7998	1.11234		15.959	86.4723		15.9415	49.9507
		15.8193	9.34022		15.8175	0.461272		15.9772	84.1753		15.9597	50.0055
		15.8368	9.97608		15.8357	0.953998		15.9953	85.1112		15.9785	48.7514
		15.8552	9.93522		15.854	0.679982		16.0145	84.3089		15.9965	50.1075
		15.874	9.11342		15.8717	2.42966		16.0315	86.8328		16.0147	53.0587
		15.8928	8.57132		15.89	1.37769		16.0502	85.6639		16.0333	48.7318
		15.9103	8.98563		15.9087	0.432711		16.0683	86.6325		16.0512	49.4192
		15.9287	7.716		15.9275	0.767103		16.0863	85.1519		16.0693	50.6209
		15.9468	9.15218		15.945	-0.246197		16.1038	84.3936		16.087	49.9345
		15.9652	8.84159		15.9635	1.34442		16.123	86.0197		16.1058	50.4098
		15.9833	9.20089		15.9817	0.824584		16.1412	83.7702		16.124	48.8448
		16.0022	9.00815		16	1.18536		16.1595	85.6386		16.1417	50.066
		16.0198	8.63522		16.0188	0.850969		16.1775	85.2935		16.1612	49.2428
		16.038	9.63562		16.0367	0.577673		16.196	83.9898		16.1797	50.6424
		16.0563	9.07152		16.0552	0.955446		16.2133	87.2733		16.1972	50.6324
		16.0745	9.46645		16.0735	1.05811		16.2322	86.0751		16.2155	50.5628
		16.0927	8.84054		16.0912	0.466334		16.25	83.8536		16.2337	48.4997
		16.1107	9.32346		16.1093	0.419338		16.2688	86.9716		16.2518	49.2871
		16.1285	8.44352		16.128	0.0585539		16.287	87.055		16.2702	49.5474
		16.1473	9.30198		16.1462	0.533212		16.305	84.1386		16.2875	48.9025
		16.1658	9.88913		16.1643	1.13041		16.3235	84.3596		16.3067	47.737
		16.1838	9.45388		16.1817	2.13034		16.3418	84.5178		16.3248	50.3668
		16.2022	9.14066		16.2003	1.73666		16.36	84.0071		16.3433	48.7485
		16.2197	8.96572		16.2187	1.4601		16.3773	84.15		16.3615	49.8754
		16.2385	8.94948		16.237	1.7804		16.396	86.9669		16.3798	50.2014
		16.2562	9.87132		16.2552	0.562853		16.415	87.4035		16.398	48.4272
		16.275	9.8708		16.2733	0.664074		16.4333	85.0024		16.4165	50.8259
		16.2932	10.2432		16.2923	1.30141		16.4512	85.2447		16.4345	48.5569
		16.3108	9.51673		16.3098	1.19838		16.4692	86.9169		16.4527	48.9582
		16.3297	8.38434		16.3283	-0.115329		16.4882	86.252		16.4712	50.3187
		16.348	8.33824		16.3468	0.608401		16.5062	86.1753		16.4895	48.8796
		16.3662	9.19932		16.365	0.407406		16.5245	84.7034		16.5073	48.6727
		16.3837	8.2602		16.3827	0.665882		16.5428	85.3208		16.5252	49.188
		16.4027	9.46802		16.4013	-0.191245		16.5612	83.2628		16.5438	50.5613
		16.4215	8.65774		16.4198	-0.288491		16.579	84.9009		16.562	49.7381
		16.439	8.49328		16.4375	0.705647		16.5975	85.3702		16.5795	50.5065
		16.4567	9.53506		16.4552	0.507907		16.6157	83.8509		16.5985	49.5174
		16.4755	9.51726		16.474	0.205323		16.634	87.0584		16.6168	49.852
		16.4937	8.6677		16.4927	1.44457		16.652	85.1826		16.635	49.7586
		16.512	9.61991		16.5103	0.401263		16.6707	87.2486		16.6527	49.4192
		16.5307	9.06524		16.5285	0.669137		16.6888	86.0945		16.6708	49.0736
		16.548	9.09929		16.5475	0.953638		16.7072	85.722		16.689	48.7885
		16.5663	7.98522		16.565	1.02991		16.7253	87.0897		16.7078	49.9869
		16.5848	9.26479		16.5838	-0.378507		16.7433	85.4089		16.726	49.4149
		16.6025	9.01705		16.6015	1.5071		16.7618	86.0918		16.7443	48.8233
		16.6207	8.79916		16.6205	0.377038		16.7793	86.2587		16.7625	49.4974
		16.6395	9.21556		16.638	0.101574		16.7977	83.7688		16.7808	50.9451
		16.6583	8.38119		16.6565	0.446084		16.8165	85.3522		16.799	48.0826
		16.676	8.52838		16.6743	0.523808		16.8347	82.9444		16.8172	49.2619
		16.6948	8.8903		16.6933	0.105189		16.853	84.7267		16.8355	49.2809
		16.7125	9.32293		16.7108	1.0686		16.8712	86.4976		16.8537	49.0374
		16.7307	8.00774		16.7293	1.03245		16.8897	86.0371		16.872	47.4576
		16.7487	9.67543		16.7473	1.25984		16.9078	85.7487		16.8902	48.7113
		16.7672	8.80178		16.7657	0.621414		16.9267	85.1867		16.9078	49.7405
		16.7848	9.78333		16.7832	0.719387		16.9442	84.4083		16.9267	48.6527
		16.8037	7.85847		16.802	0.562493		16.9632	88.1191		16.9448	48.8085
		16.8218	8.28063		16.8208	1.08017		16.9812	84.3342		16.963	49.3215
		16.8395	8.92382		16.8383	0.652869		16.9993	87.4602		16.9807	49.209
		16.8583	8.25497		16.8572	1.11415		17.0178	85.1366		16.9995	48.3304
		16.8765	8.92644		16.875	1.35744		17.0358	84.0131		17.0172	49.2462
		16.895	8.58808		16.8932	1.25803		17.054	84.5912		17.036	50.0646
		16.9127	7.0152		16.9113	0.217256		17.0722	84.5992		17.0533	48.4649
		16.9315	8.98982		16.9297	1.12608		17.0912	85.5077		17.0733	48.4463
		16.9498	7.84851		16.9478	1.51795		17.1087	86.0671		17.091	47.7746
		16.9682	8.76302		16.966	0.6901		17.1265	84.3623		17.1092	48.7823
		16.9863	9.05581		16.9845	1.5494		17.1452	86.7854		17.1273	47.7994
		17.0037	7.3965		17.0027	0.955446		17.1632	84.921		17.1448	48.524
		17.0223	8.0685		17.021	0.967378		17.181	85.1039		17.1638	49.8577
		17.04	8.80283		17.0395	1.96513		17.1995	85.8822		17.1827	49.4788
		17.0585	7.96217		17.0573	0.867237		17.2173	85.3155		17.2005	50.1762
		17.0768	9.7849		17.076	0.447892		17.236	85.4256		17.2185	49.1303
		17.0952	8.13293		17.0937	0.158328		17.2543	87.025		17.2372	49.208
		17.1133	8.21987		17.1122	0.636241		17.2728	83.1053		17.255	49.8205
		17.1317	7.86004		17.1297	1.36106		17.291	86.9215		17.2732	49.668
		17.1493	7.15138		17.1483	1.31804		17.3092	84.7341		17.2915	47.3971
		17.1683	7.49602		17.1673	0.987261		17.3272	85.6959		17.3097	50.2176
		17.1863	6.60246		17.1843	0.562853		17.346	82.5419		17.327	48.3691
		17.2045	9.35017		17.203	1.18681		17.3635	86.505		17.3462	47.8919
		17.2228	8.5687		17.2213	0.243642		17.3823	84.708		17.3647	48.9568
		17.2412	9.25904		17.2398	0.853864		17.4003	86.2854		17.3825	49.5546
		17.2592	7.12152		17.258	0.318837		17.4185	84.4143		17.4008	47.9105
		17.2777	9.14171		17.2753	0.994491		17.4368	83.5572		17.4182	48.3266
		17.2957	9.70371		17.2942	1.14668		17.4552	86.8741		17.4373	48.616
		17.3133	7.92027		17.3127	0.780843		17.4728	85.0037		17.4555	48.2318
		17.3328	7.83752		17.3307	1.21537		17.4917	86.1485		17.4737	49.7238
		17.3498	8.71483		17.3495	0.652142		17.5102	84.5966		17.4912	47.7384
		17.3688	8.40057		17.3665	0.131215		17.5282	87.2406		17.5093	46.7288
		17.3872	8.27853		17.3857	-0.516239		17.5467	85.234		17.5287	47.6464
		17.4053	6.7025		17.403	0.593581		17.5652	84.8936		17.5467	47.7241
		17.4227	9.34388		17.422	0.0592741		17.5825	87.0237		17.5648	48.8643
		17.4417	8.86411		17.4407	0.767463		17.6013	85.4029		17.5832	48.3352
		17.4597	8.90077		17.4588	-0.114248		17.6195	83.8816		17.6013	50.7539
		17.4778	8.5488		17.477	1.0827		17.6378	83.0259		17.6195	48.3686
		17.4962	8.29372		17.4953	1.23272		17.656	84.6052		17.638	47.5487
		17.5145	8.15073		17.5132	1.24501		17.6743	86.9175		17.656	48.3295
		17.5327	8.13659		17.5317	0.446811		17.6923	84.5485		17.6742	49.5102
		17.551	8.40319		17.55	0.532845		17.7107	86.5804		17.693	48.8477
		17.5693	8.54199		17.5678	0.909898		17.7283	87.2426		17.7107	49.4173
		17.5873	8.86359		17.5863	0.943153		17.7472	85.0999		17.7285	48.8715
		17.6055	9.30827		17.604	-0.133044		17.7653	86.8441		17.7472	46.6778
		17.6242	7.69243		17.6228	-0.24439		17.7837	84.0065		17.7653	48.5726
		17.642	7.89932		17.6403	0.260636		17.8018	84.0906		17.7837	49.6804
		17.6602	7.60025		17.6587	1.04365		17.82	84.3789		17.8018	48.3676
		17.6782	8.47076		17.6768	0.927613		17.8383	84.1119		17.8195	50.1352
		17.6967	7.35355		17.6952	0.942433		17.8565	85.9129		17.8382	49.0202
		17.7148	7.54368		17.714	1.21609		17.8747	84.6233		17.8568	47.9481
		17.7335	5.843		17.7312	1.06968		17.8927	82.4892		17.8747	48.1217
		17.7513	7.18804		17.7498	0.30293		17.9118	86.0751		17.893	48.0416
		17.7698	7.68667		17.768	0.204963		17.929	86.6719		17.9112	48.9821
		17.7882	7.9187		17.7867	0.709262		17.9477	85.6746		17.9295	48.5183
		17.8067	8.31782		17.8048	1.34623		17.966	84.3275		17.9468	49.0912
		17.8248	6.8345		17.8227	1.14343		17.9842	85.8248		17.9663	49.6075
		17.8425	7.5442		17.841	0.910618		18.0023	84.1226		17.9842	48.4777
		17.8602	9.04953		17.8598	0.722635		18.0205	85.0244		18.0023	49.4592
		17.879	8.36653		17.8775	-0.144609		18.0388	83.8202		18.0197	48.8462
		17.8978	7.9187		17.8963	0.766383		18.057	85.481		18.0388	48.6756
		17.9153	7.58401		17.914	-0.128341		18.0753	85.1333		18.057	46.9957
		17.9343	8.67031		17.9318	0.347758		18.0935	83.5365		18.0753	48.9215
		17.9527	7.19171		17.9503	0.159055		18.1117	84.3289		18.0935	47.2617
		17.97	6.43486		17.9687	1.21175		18.13	86.5724		18.1118	50.0413
		17.988	7.02148		17.9872	1.28333		18.148	85.0792		18.1293	48.1746
		18.0065	7.69191		18.005	0.625029		18.1663	83.9003		18.1482	47.0891
		18.0247	7.47926		18.0237	0.503565		18.1853	84.1106		18.1663	47.9114
		18.043	8.25549		18.0415	0.940265		18.203	83.7161		18.1852	49.1708
		18.0615	8.2382		18.0592	1.09716		18.2212	84.0652		18.2028	46.8384
		18.0795	7.81552		18.0782	0.130495		18.2393	83.2081		18.2212	48.2132
		18.098	7.97999		18.0962	1.40516		18.2577	83.907		18.24	49.3606
		18.1153	8.39952		18.1152	0.751196		18.2758	84.8162		18.2575	48.2713
		18.1337	6.78474		18.1327	0.92327		18.294	83.102		18.2762	46.4976
		18.1525	9.40673		18.1515	1.69111		18.312	84.0405		18.2942	49.2886
		18.1707	8.29844		18.1692	0.387523		18.3303	83.401		18.3125	47.6016
		18.1888	6.30758		18.1873	0.578761		18.3487	84.4697		18.3303	46.8236
		18.207	8.44404		18.2057	0.983646		18.3668	84.5932		18.3487	46.8041
		18.2248	8.12716		18.2243	0.619974		18.3852	82.5406		18.368	47.0896
		18.243	8.82116		18.242	0.248344		18.4037	85.0004		18.3857	48.2146
		18.262	8.16644		18.2607	0.563213		18.4218	84.0906		18.4038	47.4138
		18.28	7.58663		18.2785	-0.215102		18.4402	84.168		18.4222	49.5632
		18.2977	8.68027		18.2967	0.130495		18.4583	84.923		18.4403	46.9805
		18.317	8.54304		18.3155	-0.00651697		18.4773	83.4718		18.4588	48.1026
		18.3347	8.00355		18.3332	0.416083		18.4942	83.933		18.4768	45.9832
		18.3532	9.11866		18.3517	-0.129069		18.513	83.622		18.495	48.4429
		18.3712	7.39755		18.3697	0.810124		18.5303	84.5999		18.5135	49.2643
		18.3898	7.99727		18.3878	-0.144249		18.55	83.8242		18.5315	48.4072
		18.4077	7.03667		18.406	1.88199		18.5675	82.7308		18.5497	47.3175
		18.4258	7.35408		18.4245	0.447892		18.5865	84.0352		18.568	48.5054
		18.4447	8.12926		18.4432	0.0849465		18.605	82.5733		18.5862	49.729
		18.4622	7.14666		18.4602	-0.476833		18.6228	87.0524		18.6045	47.7193
		18.4808	8.71693		18.4793	1.09824		18.6412	84.2201		18.6232	47.6054
		18.4987	7.43421		18.4972	0.530678		18.6593	81.6935		18.6403	47.6636
		18.517	7.92027		18.516	0.809764		18.6777	84.6526		18.6593	46.9419
		18.5358	8.26072		18.5337	0.592861		18.6958	82.4652		18.6772	48.5421
		18.5537	8.93063		18.5522	1.11415		18.7142	83.7274		18.6958	49.0517
		18.5715	8.07007		18.5708	0.548753		18.7323	84.7614		18.714	47.7789
		18.5902	7.93598		18.5883	1.15463		18.7505	82.5399		18.7323	48.0616
		18.6083	8.02346		18.606	0.882785		18.7687	83.2628		18.7505	46.9004
		18.6267	7.121		18.6248	0.966651		18.787	84.4444		18.7687	48.3505
		18.6445	7.8967		18.643	0.750475		18.805	87.0517		18.7862	49.5312
		18.6628	8.65146		18.6615	-0.141721		18.8233	85.4009		18.8052	48.5383
		18.6817	7.85795		18.6795	0.854952		18.8417	85.7527		18.8228	47.6035
		18.6993	8.00041		18.6978	0.615631		18.8597	83.64		18.8422	48.5402
		18.7175	7.4384		18.716	0.386436		18.8778	81.6588		18.8602	48.748
		18.7363	7.08381		18.7348	1.09716		18.8965	83.1794		18.8783	47.1463
		18.7538	6.85073		18.7525	-0.417545		18.9145	85.2394		18.8967	47.8361
		18.7722	9.15009		18.7707	0.388611		18.9328	82.9411		18.9148	48.1827
		18.7903	7.21056		18.7895	0.726978		18.951	84.3062		18.933	48.094
		18.8087	7.96165		18.807	0.767823		18.9693	83.7208		18.9505	48.534
		18.8263	6.47676		18.8258	-0.0838804		18.988	84.3329		18.9695	47.4362
		18.845	7.96217		18.8442	-0.419353		19.0055	85.2627		18.9875	46.8437
		18.8633	7.27237		18.862	0.796744		19.0237	83.4184		19.006	47.3399
		18.8818	6.47571		18.8803	0.424761		19.0418	84.7107		19.0242	47.4157
		18.8997	6.62132		18.8982	-0.664816		19.0605	82.6761		19.0423	46.9766
		18.918	8.00774		18.9165	0.664794		19.0783	83.5579		19.0607	46.0438
		18.9365	8.09103		18.9347	0.852417		19.0968	83.4464		19.0788	47.7336
		18.9545	8.03131		18.953	0.349205		19.1153	83.1881		19.0972	47.2264
		18.9732	7.60758		18.9712	0.583096		19.1333	83.0799		19.1153	47.1649
		18.9908	7.79561		18.9893	0.406686		19.1515	83.0546		19.1335	46.7288
		19.0092	6.28663		19.0077	0.505372		19.1698	84.4917		19.1518	47.1783
		19.0273	7.22732		19.0265	0.641664		19.1878	82.867		19.1697	47.6998
		19.0455	7.04086		19.044	0.591773		19.2062	81.4999		19.1885	48.2947
		19.0645	8.42205		19.0628	0.579121		19.2245	83.4231		19.2068	46.2545
		19.082	7.36141		19.0805	0.619974		19.2427	84.4123		19.2247	47.7818
		19.1003	6.65589		19.0987	0.33221		19.261	82.2709		19.2435	48.9172
		19.1185	6.91778		19.117	0.678174		19.2792	84.7274		19.262	48.902
		19.1367	6.97382		19.1355	1.11306		19.2972	82.0934		19.2805	47.0887
		19.1552	6.95601		19.154	0.388971		19.316	81.7436		19.2983	46.233
		19.1735	7.96374		19.1715	-0.533594		19.3338	82.094		19.3167	46.2526
		19.1913	7.10895		19.19	0.897965		19.352	81.3184		19.3348	48.6689
		19.2097	6.62499		19.2082	0.0563863		19.3703	84.5452		19.353	47.7613
		19.2278	7.98627		19.2263	0.476812		19.3885	83.2368		19.3718	46.4866
		19.2462	7.35879		19.2448	0.301849		19.4065	83.1834		19.3897	46.9952
		19.2648	6.8324		19.2627	0.575146		19.4253	82.2255		19.408	47.2608
		19.2827	7.16552		19.281	0.677814		19.4428	83.5052		19.4263	47.0677
		19.3013	5.84771		19.2987	0.957613		19.4612	81.2089		19.4445	47.584
		19.3185	6.66532		19.3178	-0.241855		19.4797	85.0044		19.4627	46.4618
		19.3372	6.95758		19.3363	-0.418632		19.4978	83.6126		19.4815	46.3674
		19.3555	7.16657		19.354	0.664434		19.516	83.6614		19.4995	47.9148
		19.3743	7.06286		19.3727	1.08595		19.5345	81.8918		19.5177	47.8518
		19.3918	7.46459		19.3898	0.433432		19.5528	85.9596		19.5365	47.9543
		19.4102	6.60403		19.409	1.51614		19.5703	85.0017		19.5542	46.2521
		19.429	6.99634		19.4268	-0.376339		19.5893	83.369		19.5723	46.8618
		19.4472	6.8963		19.4457	0.753363		19.6078	84.1133		19.5905	46.3899
		19.4652	6.70041		19.4633	0.305825		19.626	82.2168		19.6095	47.3165
		19.483	6.1185		19.4815	1.5165		19.6442	80.488		19.627	47.1549
		19.5015	6.18502		19.5003	1.37334		19.6625	83.417		19.6453	46.1181
		19.5197	6.43171		19.518	0.783011		19.6807	83.2335		19.6635	46.7688
		19.5383	6.89787		19.5368	0.435606		19.699	83.875		19.6817	47.9653
		19.556	7.29227		19.5545	2.72248		19.7172	82.618		19.7002	46.0042
		19.5742	7.39545		19.573	0.956173		19.7353	81.0206		19.7187	45.8111
		19.5925	8.25287		19.5915	0.679622		19.7537	82.6514		19.7368	46.5209
		19.6107	7.2488		19.6092	-0.0462825		19.7718	83.2108		19.7552	46.6153
		19.6288	6.22587		19.6273	0.868325		19.79	84.9684		19.7735	46.408
		19.647	6.416		19.6462	1.13041		19.8077	83.2368		19.7918	47.2059
		19.6653	7.60758		19.6637	0.115674		19.8265	81.8984		19.8102	47.2812
		19.6835	8.31887		19.6823	0.447532		19.8448	83.3123		19.8283	45.876
		19.702	8.25915		19.7003	0.203516		19.863	84.411		19.8457	45.7363
		19.72	6.14731		19.7192	0.681062		19.8812	82.2569		19.8648	45.6248
		19.7382	7.10476		19.7373	0.508267		19.8993	82.4291		19.8827	46.878
		19.7565	7.23204		19.7543	0.0289133		19.9177	83.8289		19.9013	47.2598
		19.7747	7.04191		19.7735	-0.318498		19.9358	81.8163		19.9195	45.3187
		19.7932	8.73526		19.7913	0.173875		19.9542	86.1666		19.9377	47.3752
		19.8112	5.82466		19.8102	0.435239		19.9723	82.7776		19.9558	47.9477
		19.83	7.24618		19.8285	0.242921		19.9905	82.1407		19.9742	46.0018
		19.8482	7.22994		19.8463	0.841932		20.0088	81.287		19.9923	46.3479
		19.8658	6.1803		19.8647	0.909177		20.0273	81.4438		20.0107	46.2306
		19.8847	5.93256		19.8832	0.448619		20.0455	82.4064		20.0295	46.1744
		19.9023	7.56778		19.9013	0.648527		20.0637	85.21		20.0468	46.4242
		19.9212	6.57261		19.919	1.08342		20.0823	84.7895		20.0653	47.7532
		19.9393	6.95444		19.9373	0.465247		20.1002	83.2662		20.0835	47.001
		19.9577	5.80319		19.9555	0.431264		20.1183	82.7849		20.1018	48.2094
		19.9752	6.07241		19.9737	0.347037		20.1367	83.5826		20.12	46.8842
		19.9928	7.0021		19.9918	1.2132		20.1552	82.4138		20.1388	46.5205
		20.0117	8.13397		20.0108	0.638409		20.1732	83.0159		20.1568	45.6996
		20.0298	5.54968		20.0283	0.836876		20.1913	81.6915		20.1747	47.1082
		20.0482	5.69686		20.0472	-0.0983406		20.2103	80.813		20.193	46.1339
		20.0663	7.01572		20.0648	0.92906		20.2278	81.1842		20.211	44.4402
		20.0848	6.43538		20.083	0.50646		20.246	82.3243		20.2302	46.561
		20.1023	5.25637		20.1015	0.227374		20.2645	82.865		20.248	45.2758
		20.121	6.77059		20.1197	0.0581938		20.2825	82.7522		20.2663	47.2593
		20.139	7.20585		20.1377	0.753003		20.301	83.903		20.2847	45.2043
		20.1575	7.01729		20.1562	1.17235		20.319	82.056		20.303	46.7674
		20.1763	6.78892		20.1743	1.20127		20.3372	82.7115		20.321	45.314
		20.1937	6.56056		20.1925	0.825664		20.3553	82.5613		20.3392	46.3093
		20.2122	6.43067		20.2107	0.128687		20.3737	84.4811		20.358	46.2721
		20.2303	7.10372		20.229	-0.361879		20.3918	83.2388		20.376	46.8022
		20.2488	7.81762		20.2477	-0.214382		20.41	82.3297		20.3948	43.3205
		20.2668	7.56411		20.266	0.622861		20.4278	82.8456		20.4115	46.3484
		20.2853	6.79102		20.2835	1.49083		20.4473	83.8509		20.4307	45.4107
		20.3033	7.92289		20.302	-0.377419		20.4653	81.829		20.4488	45.5437
		20.3218	6.97591		20.3197	0.923998		20.4835	81.5867		20.467	44.0946
		20.3397	5.84614		20.3382	1.30104		20.5017	82.7308		20.4853	46.7884
		20.3582	6.6627		20.3565	1.06968		20.52	81.5573		20.5035	47.9281
		20.3763	6.66479		20.375	1.19946		20.5382	80.2704		20.5218	44.8773
		20.3945	6.22692		20.3928	1.11596		20.5558	83.7662		20.54	45.1104
		20.4132	5.15738		20.4115	0.612743		20.5742	82.5406		20.5582	44.823
		20.4308	7.19066		20.4297	0.76819		20.5932	81.793		20.5765	46.3522
		20.4492	6.85021		20.4477	0.797471		20.6112	84.5171		20.5947	45.6796
		20.4675	5.96975		20.4658	0.132302		20.6292	82.8123		20.6128	46.3269
		20.4857	6.7664		20.4842	-0.508648		20.6477	82.8089		20.6313	45.4308
		20.5045	6.41496		20.5023	0.608041		20.6657	81.4499		20.6497	47.0877
		20.522	7.65315		20.5205	0.0889217		20.6838	82.9705		20.6677	45.0728
		20.5397	6.83188		20.5388	1.3043		20.7023	79.4146		20.6868	45.2863
		20.5588	5.72096		20.5577	0.677447		20.7205	84.2728		20.7052	46.122
		20.577	7.25089		20.5752	0.616359		20.7387	83.4264		20.7237	46.1529
		20.5948	5.44755		20.5935	1.50385		20.7565	80.4439		20.7413	45.2801
		20.6133	6.30182		20.6117	-0.0278472		20.7748	81.6882		20.7598	45.5657
		20.6315	6.32801		20.6298	0.870132		20.793	82.9104		20.7783	46.0791
		20.65	5.80476		20.6482	1.11198		20.8117	81.7669		20.7963	45.9875
		20.6682	6.13945		20.6667	2.16757		20.8305	81.4979		20.8142	45.5652
		20.6862	6.70722		20.6847	1.06715		20.8483	80.4613		20.8325	45.6562
		20.7043	6.1824		20.7033	1.49192		20.8658	83.9337		20.8508	44.6876
		20.7225	6.34582		20.721	0.553095		20.8843	82.5733		20.8697	43.4496
		20.7408	6.80464		20.7395	0.199901		20.9022	81.5333		20.8877	46.1606
		20.759	6.24525		20.7577	0.53646		20.921	82.4084		20.905	46.4609
		20.7772	5.4046		20.776	-0.621435		20.9395	82.0046		20.9242	45.1691
		20.7955	7.12414		20.794	-0.304758		20.9577	81.3945		20.943	44.8792
		20.8137	6.05146		20.812	1.61989		20.976	82.0353		20.9605	46.2511
		20.8322	5.53344		20.8305	0.49272		20.9943	82.6748		20.9788	45.0508
		20.8507	5.91004		20.8483	0.202436		21.013	83.2895		20.9973	45.4532
		20.8683	6.17926		20.8675	0.0874743		21.031	82.7862		21.0152	46.0824
		20.8865	6.70669		20.8845	-0.0976133		21.0493	81.8243		21.034	44.6514
		20.9052	6.09231		20.9037	1.03787		21.0677	81.3938		21.0517	45.9637
		20.923	7.94332		20.9215	0.291724		21.0857	84.7841		21.07	46.5405
		20.9413	6.20807		20.94	2.24349		21.1042	82.8663		21.0885	45.2839
		20.9595	7.06286		20.958	0.763848		21.1223	83.0746		21.1065	44.1175
		20.978	6.45109		20.9762	1.09933		21.1405	81.4105		21.1247	47.6416
		20.9965	6.0546		20.9947	-0.0122996		21.1587	83.8723		21.1428	45.7363
		21.0148	6.16407		21.0127	0.31739		21.177	82.1154		21.1617	44.9326
		21.0325	6.39296		21.031	0.460911		21.1958	79.8725		21.1793	46.1925
		21.0507	5.74033		21.0497	1.185		21.214	81.7469		21.1975	44.2481
		21.0688	5.93151		21.0675	1.3466		21.2312	83.6073		21.2157	45.0494
		21.0868	6.39453		21.0857	0.909177		21.2502	81.0226		21.234	46.5534
		21.1048	5.99332		21.1037	0.623949		21.2687	81.4185		21.2522	45.2992
		21.1238	5.78224		21.122	0.89399		21.2862	82.8637		21.2702	46.8217
		21.1423	6.5019		21.1408	-1.02596		21.3052	81.5553		21.2887	43.7542
		21.16	4.9243		21.1582	-0.24439		21.3227	82.0132		21.307	44.8349
		21.179	6.26201		21.1773	0.216529		21.3415	83.925		21.3253	46.3813
		21.1965	6.32906		21.1955	0.361858		21.3595	80.8117		21.3437	46.6878
		21.215	6.01217		21.2132	-0.849183		21.3772	80.1088		21.3618	45.8903
		21.2328	6.03365		21.2313	0.654316		21.3962	82.8496		21.3802	45.2401
		21.2512	5.49207		21.2497	-0.548054		21.4145	82.2763		21.3983	45.3159
		21.2695	6.26149		21.2678	0.129047		21.4325	81.0727		21.4165	45.3907
		21.2877	6.18083		21.286	0.768551		21.451	82.4091		21.4347	45.1448
		21.3058	5.99122		21.3043	0.318117		21.4692	80.9913		21.453	45.415
		21.3242	6.03469		21.3232	0.158688		21.4873	80.5974		21.4713	44.4969
		21.343	6.03784		21.341	0.666602		21.5055	83.0446		21.4897	47.3022
		21.3605	6.07503		21.3588	1.53421		21.5238	80.9412		21.508	47.3375
		21.3787	5.10081		21.3773	0.105189		21.542	80.4332		21.5253	44.5165
		21.3975	7.43107		21.396	0.244369		21.56	80.747		21.5445	45.2425
		21.4152	6.77007		21.4132	0.694442		21.5793	82.1841		21.5627	47.0544
		21.4335	6.2442		21.4318	1.57904		21.5967	80.5307		21.5808	46.3246
		21.4517	5.32027		21.4502	0.522		21.615	82.8136		21.599	45.6038
		21.4698	4.65299		21.4683	-0.0835203		21.6332	80.6675		21.617	44.1566
		21.4882	5.11233		21.4867	-0.401645		21.6515	80.9359		21.6355	44.3473
		21.5067	6.66584		21.5048	-0.550942		21.67	81.5527		21.6537	45.6048
		21.5245	5.71834		21.5228	0.335825		21.6878	82.8343		21.672	45.3364
		21.543	6.01322		21.5418	1.31478		21.7062	81.6962		21.6908	43.8315
		21.561	6.15831		21.5598	-0.777969		21.7242	81.3751		21.7087	46.2554
		21.5798	5.61411		21.5777	-0.0267598		21.7423	80.8084		21.7267	45.5866
		21.5975	5.21552		21.5955	0.273649		21.761	79.8478		21.7445	46.6277
		21.6158	5.65129		21.6148	0.793856		21.779	82.4959		21.764	45.5671
		21.6342	5.3407		21.633	-0.623243		21.7972	82.0112		21.7817	45.3626
		21.6527	5.84509		21.6507	-0.652523		21.8155	80.0674		21.7993	44.9626
		21.6708	6.93506		21.6692	1.155		21.8337	81.8457		21.8183	43.7852
		21.6893	5.45069		21.6877	1.23055		21.8517	79.7924		21.8363	44.6666
		21.7068	5.84509		21.706	-0.76423		21.8702	80.0848		21.8552	43.3338
		21.725	6.03522		21.7238	0.533933		21.8883	81.4258		21.8728	45.6014
		21.7433	5.54916		21.7417	0.272562		21.9063	80.6548		21.891	45.416
		21.7615	5.766		21.7603	0.998106		21.9252	79.2043		21.9092	47.1678
		21.7797	6.12216		21.7782	-0.213662		21.9432	79.3866		21.9275	44.1356
		21.798	5.59839		21.7965	0.394033		21.9613	82.2816		21.9457	45.5137
		21.8162	5.93256		21.8147	-0.489126		21.9795	79.7584		21.9638	44.5332
		21.8347	6.41338		21.8335	0.532485		21.9978	79.2704		21.9823	46.2711
		21.8533	5.18199		21.8512	0.475372		22.0158	80.2523		22.0003	45.0909
		21.8708	4.7106		21.8697	0.476812		22.0342	82.2789		22.0185	46.3493
		21.8892	5.19876		21.8877	0.414636		22.0525	83.4764		22.0368	43.2933
		21.9082	5.95665		21.9063	0.115674		22.0705	80.5914		22.055	45.1386
		21.9255	5.13643		21.9247	-0.736396		22.0885	79.7177		22.0733	47.5854
		21.9442	5.90742		21.9428	-0.0603826		22.1075	81.1041		22.0915	45.6763
		21.962	5.37684		21.9607	0.232076		22.1253	80.488		22.1097	44.3992
		21.9805	6.05879		21.9788	-0.318498		22.1432	84.0165		22.128	45.6796
		21.9988	5.19614		21.997	-0.146784		22.1615	80.7336		22.1462	43.5979
		22.017	4.88397		22.0158	-0.24547		22.18	79.7597		22.1645	45.5271
		22.0352	6.46995		22.0333	0.68179		22.1983	79.9252		22.1827	46.3293
		22.0535	5.31713		22.052	0.488745		22.2165	82.2502		22.2008	43.9292
		22.0715	6.66637		22.0698	0.678535		22.2348	80.6502		22.2197	44.2252
		22.09	6.16616		22.0877	-0.162324		22.253	79.6075		22.2373	44.0779
		22.1073	4.7944		22.1063	0.524535		22.2707	81.5567		22.2555	44.3997
		22.1262	5.24171		22.1248	0.638409		22.2893	82.4518		22.2738	45.4312
		22.1448	6.06141		22.1423	0.517665		22.3075	83.0439		22.292	47.7003
		22.1625	4.85987		22.161	0.560685		22.3255	80.5087		22.3102	43.9635
		22.1813	6.81197		22.1793	0.200628		22.3443	79.6529		22.3285	44.73
		22.199	5.55701		22.1977	-0.661201		22.3623	80.6428		22.3467	43.1799
		22.2173	5.23542		22.2158	1.08378		22.3807	80.6422		22.3655	44.5146
		22.2358	5.45331		22.234	0.565381		22.3985	82.2836		22.384	43.6222
		22.2543	5.63454		22.2523	0.795663		22.4168	80.9926		22.4017	45.0346
		22.2722	5.27889		22.2705	0.14206		22.4352	78.9727		22.4198	45.3202
		22.2902	4.83788		22.2893	0.0860268		22.4535	81.4746		22.4382	45.2177
		22.3087	5.09086		22.3072	0.752643		22.4717	79.3392		22.4563	45.8455
		22.3265	5.02486		22.3245	1.04401		22.4905	79.5995		22.4747	44.9398
		22.3452	6.49195		22.3437	0.173515		22.508	80.219		22.4928	45.0775
		22.3625	6.48095		22.3622	0.333298		22.5263	81.6922		22.511	45.3511
		22.3815	4.94368		22.38	0.420779		22.5447	80.0414		22.529	43.4644
		22.3995	6.22587		22.398	-0.304758		22.5628	82.7342		22.548	43.9378
		22.4183	6.97644		22.416	0.883145		22.581	80.0661		22.5657	44.4231
		22.436	5.74033		22.4345	0.622141		22.5988	80.1709		22.584	45.5466
		22.4545	5.8498		22.4527	-1.00788		22.6172	82.5199		22.6022	44.9388
		22.4718	5.17728		22.471	0.187248		22.636	80.7002		22.6203	44.8935
		22.4905	4.00508		22.4892	-0.663008		22.6543	82.5967		22.6387	44.2452
		22.5088	5.55073		22.5082	-0.331871		22.6725	82.0847		22.6568	43.7547
		22.5272	6.70565		22.5253	1.27321		22.6898	80.9112		22.6753	44.7081
		22.5453	5.3936		22.5437	-0.320306		22.7093	79.0455		22.6933	44.7687
		22.5637	4.21407		22.562	0.0896419		22.7272	80.0894		22.711	44.2901
		22.5817	6.8963		22.581	0.708542		22.745	80.1956		22.7297	44.0908
		22.6003	7.04191		22.5985	0.362578		22.764	80.8584		22.748	45.0709
		22.6185	4.91225		22.6173	-0.173529		22.7818	80.1916		22.7662	45.3869
		22.6368	3.97627		22.6357	0.92978		22.8	81.4786		22.7845	45.1972
		22.6545	5.68534		22.6535	0.767823		22.8183	79.1843		22.8023	44.4812
		22.6728	5.55335		22.6713	0.812651		22.8358	81.8477		22.8212	43.2833
		22.6912	5.47321		22.6897	0.144595		22.8548	81.2135		22.8395	44.464
		22.7097	5.24433		22.7078	-0.188357		22.873	83.371		22.8577	44.5356
		22.7282	5.66491		22.726	-0.332591		22.8908	81.1468		22.8758	43.6942
		22.7458	5.82257		22.7443	0.112059		22.9093	78.3272		22.8932	44.6857
		22.7647	5.44912		22.7627	1.3466		22.9277	79.3412		22.9123	46.1134
		22.7822	5.32446		22.7813	-0.660841		22.946	79.229		22.9305	43.1617
		22.8005	5.63663		22.7992	0.231356		22.9642	80.0648		22.949	44.7644
		22.8187	4.31358		22.8173	-0.0141072		22.9823	79.8725		22.9672	44.4669
		22.8373	4.9264		22.8355	0.257742		23.0007	81.7142		22.9855	42.1531
		22.8552	6.4799		22.8532	0.290277		23.0182	80.9959		23.0037	45.9437
		22.8735	4.71532		22.872	0.548393		23.037	81.5013		23.0218	43.7123
		22.8917	4.52518		22.8908	0.536828		23.0558	81.1555		23.0402	43.4501
		22.9098	5.43131		22.9083	-0.546246		23.0737	79.229		23.0578	44.4259
		22.9278	5.3077		22.9267	-0.504673		23.0915	79.9246		23.0767	44.6638
		22.9467	3.838		22.9448	-0.23101		23.1105	78.6449		23.0948	42.9158
		22.9645	5.29827		22.9625	0.49272		23.1283	79.9433		23.113	43.3329
		22.9827	4.9861		22.9808	-0.82243		23.1467	80.5387		23.1318	44.0412
		23.001	4.57075		22.9997	0.292085		23.1648	79.7377		23.1492	44.8811
		23.0198	2.89206		23.0178	-0.117496		23.1828	79.1556		23.168	43.1665
		23.038	4.7855		23.0367	-0.531786		23.2017	79.4693		23.186	44.6275
		23.0558	4.19102		23.054	0.897965		23.2195	82.4899		23.205	43.7171
		23.0738	4.35862		23.0722	0.260636		23.2378	78.9961		23.2223	43.5455
		23.0922	5.38784		23.0908	-1.45579		23.256	79.0441		23.2407	43.1265
		23.111	4.27535		23.1083	-0.737477		23.2743	80.1395		23.2588	43.5617
		23.1287	5.42398		23.1273	-0.0401397		23.2923	80.2156		23.2775	46.1377
		23.1468	5.17938		23.1452	-0.61023		23.3108	79.0755		23.2958	43.3157
		23.165	5.13381		23.1633	-0.988002		23.329	78.4874		23.3138	43.7523
		23.1833	5.13852		23.1813	-0.0596553		23.3478	79.2037		23.3322	43.4477
		23.2015	3.89718		23.1998	-0.0437548		23.3653	80.0601		23.3505	43.4487
		23.22	5.90847		23.2177	-0.795685		23.3837	80.3037		23.3688	44.5146
		23.238	5.80319		23.236	0.332577		23.4017	79.8685		23.3875	43.1379
		23.2562	4.75722		23.2548	0.478987		23.4202	83.3643		23.4062	45.7344
		23.2745	4.52885		23.273	-0.677828		23.4383	79.9019		23.4237	44.5141
		23.2933	5.47217		23.2907	-0.271136		23.4565	82.0313		23.4412	45.7973
		23.3115	5.67748		23.3095	0.676007		23.4755	79.8445		23.4602	45.1047
		23.3292	5.82414		23.3283	0.652142		23.4923	80.9719		23.4785	44.3272
		23.3475	4.6247		23.346	1.12825		23.5112	81.9538		23.4967	45.5085
		23.3663	4.82059		23.3635	-1.3289		23.5295	80.9666		23.5148	43.4563
		23.3838	4.04384		23.3828	0.882785		23.5478	76.9347		23.533	44.7806
		23.402	4.59065		23.4	-0.288131		23.566	79.3458		23.5513	42.7394
		23.4203	5.75605		23.4185	-0.0126597		23.5842	80.9906		23.5697	43.8544
		23.439	5.23647		23.4368	-0.363687		23.6025	79.3031		23.5878	42.6288
		23.4568	3.8338		23.4553	-0.418272		23.621	77.8406		23.606	43.8053
		23.4747	4.23659		23.473	-1.2472		23.6388	77.7691		23.6242	44.7663
		23.4935	4.28896		23.4923	-0.173169		23.6572	81.1288		23.6417	45.0685
		23.5113	5.61934		23.51	-0.0835203		23.6753	77.7358		23.6612	42.9539
		23.5295	4.10879		23.5282	-0.105931		23.6935	81.0206		23.6783	43.0664
		23.5478	5.25846		23.5465	0.54948		23.7117	81.263		23.6978	44.9936
		23.5663	4.94473		23.564	0.375231		23.73	79.9833		23.7153	44.3458
		23.5843	4.77502		23.583	0.0704864		23.7482	82.7896		23.7342	45.028
		23.6027	3.42264		23.6005	0.0148132		23.7665	79.7457		23.752	43.8091
		23.6208	4.80069		23.619	0.537908		23.7845	79.4173		23.77	42.0368
		23.639	4.79702		23.637	0.479347		23.8028	81.4452		23.7888	42.1693
		23.6573	5.32393		23.6558	-0.373804		23.8212	79.9573		23.807	43.7147
		23.6762	5.24118		23.674	-1.12537		23.8392	81.5814		23.8252	44.3635
		23.6937	4.65613		23.6923	-0.27331		23.8578	82.3016		23.8437	42.8347
		23.7125	3.87309		23.711	-0.419353		23.8763	79.8458		23.8618	43.9955
		23.7302	4.60794		23.7287	0.794936		23.894	77.4374		23.8793	44.5761
		23.7483	3.26551		23.7463	0.723002		23.9123	81.4005		23.8988	42.5692
		23.7667	3.62168		23.7652	0.566828		23.9305	81.2676		23.9163	43.4106
		23.7848	4.06688		23.7833	0.116395		23.9487	77.8212		23.9352	43.7986
		23.8025	4.39896		23.8017	0.0990396		23.9667	79.0942		23.9528	43.2218
		23.8215	5.11495		23.8198	-0.0303749		23.9848	80.4045		23.9712	44.8983
		23.8395	4.14755		23.8387	-0.044475		24.0033	80.4005		23.9885	44.2915
		23.8578	4.58804		23.8562	0.807956		24.0217	79.3952		24.0082	42.4162
		23.876	5.05053		23.8747	-0.200282		24.0398	80.3011		24.0258	43.4468
		23.8942	6.20335		23.8928	0.435239		24.0577	79.4219		24.044	45.4298
		23.9118	5.54968		23.9103	0.779756		24.0753	80.8364		24.0617	43.2585
		23.9312	5.10029		23.929	0.0610816		24.0945	79.1236		24.0797	45.0322
		23.9488	3.96266		23.9475	0.114587		24.1128	78.0041		24.0987	43.1617
		23.9677	4.1884		23.965	-0.548774		24.1308	79.0107		24.117	42.3633
		23.9853	2.81193		23.984	0.609849		24.1493	79.2344		24.1352	43.2023
		24.0035	4.29787		24.0022	0.1135		24.1675	79.3084		24.1535	42.2522
		24.0217	4.86249		24.0205	0.270034		24.1855	74.3174		24.1717	43.7352
		24.04	4.55137		24.0387	-0.171362		24.2042	77.9267		24.1898	41.8823
		24.0583	4.25754		24.0563	-0.436708		24.2222	79.5247		24.208	42.6522
		24.0768	4.98296		24.075	0.548393		24.2408	80.245		24.2268	42.3442
		24.095	3.71229		24.0933	-0.118223		24.2587	79.6863		24.2448	43.7323
		24.113	5.07252		24.1108	0.681429		24.2768	79.6082		24.263	42.3047
		24.1312	5.76128		24.1292	0.605146		24.2955	78.5094		24.2813	44.2905
		24.1497	4.75407		24.148	0.53502		24.3133	79.6796		24.3002	43.5069
		24.1682	4.80593		24.1657	0.649974		24.3315	80.492		24.3175	42.3409
		24.1853	4.86092		24.1843	0.31739		24.35	78.9433		24.336	41.3775
		24.2042	4.54509		24.2033	-1.0585		24.368	81.5814		24.3542	43.0645
		24.2223	5.09714		24.2208	0.924718		24.3862	79.6836		24.3723	43.7195
		24.2412	5.25846		24.2392	-0.287403		24.4045	81.1341		24.3907	43.0445
		24.2592	5.18985		24.2573	-0.407787		24.4225	79.7243		24.4088	43.2189
		24.2768	5.09347		24.2757	0.103022		24.4407	78.5655		24.427	45.1223
		24.2947	5.05315		24.2932	-0.334399		24.4592	78.2438		24.4458	43.6217
		24.3137	6.44271		24.312	-0.21691		24.4773	78.41		24.4638	43.0097
		24.3323	4.34291		24.3297	-0.24511		24.4955	79.2777		24.4817	44.1756
		24.3493	5.00705		24.3487	1.1268		24.5145	77.6851		24.5005	41.848
		24.3687	3.96423		24.3668	0.0328885		24.532	80.1342		24.5187	43.3133
		24.3863	5.094		24.3848	-0.111713		24.5502	79.3845		24.5362	43.6823
		24.4048	4.76246		24.4032	0.389331		24.5688	79.9246		24.5552	42.9191
		24.4228	4.96463		24.4213	0.594668		24.5873	79.8144		24.5735	42.9811
		24.4417	5.69843		24.4397	-0.619267		24.6052	77.3106		24.5922	42.0954
		24.4593	5.02905		24.4578	-0.0712277		24.6232	77.9207		24.6098	43.6808
		24.4775	4.75617		24.4767	-0.511536		24.642	79.3151		24.6282	43.504
		24.4958	4.54718		24.4942	-0.0137471		24.6602	79.9746		24.6467	42.2689
		24.5143	4.79964		24.513	-0.719769		24.6783	79.6542		24.6652	41.8051
		24.5317	3.87832		24.5308	-0.476833		24.6967	80.7743		24.6837	43.7323
		24.5507	4.79702		24.549	0.246176		24.7148	79.7437		24.7015	42.4748
		24.5683	5.36688		24.5667	-0.579502		24.733	82.4652		24.7198	43.1779
		24.5867	4.12817		24.5848	-0.21619		24.7513	80.7823		24.738	43.6184
		24.6053	4.12712		24.6037	-0.823158		24.7693	79.6883		24.7568	42.0811
		24.6237	3.91237		24.6213	0.14206		24.7883	80.0601		24.7748	44.097
		24.6418	5.15476		24.6402	0.635874		24.8062	79.9813		24.7935	42.972
		24.6598	4.04803		24.6587	0.319197		24.8252	80.008		24.8115	42.6688
		24.6783	4.50633		24.676	0.636961		24.8427	82.0593		24.8302	42.9539
		24.6963	5.29513		24.6948	0.778668		24.8605	79.0448		24.848	43.0683
		24.7145	5.34331		24.7125	-0.766037		24.8785	79.8752		24.8657	42.3228
		24.7327	4.77817		24.731	-0.131956		24.8967	78.5949		24.8845	42.9134
		24.7515	5.34436		24.7495	0.388243		24.9157	78.8912		24.9028	42.022
		24.7687	6.02841		24.7672	0.565021		24.9338	79.7811		24.9212	41.7398
		24.7875	4.54823		24.7858	-0.0144672		24.952	80.4866		24.9393	41.8432
		24.8055	3.66463		24.8045	-0.391159		24.9703	81.1768		24.9575	41.9786
		24.8238	4.61108		24.8225	-0.348859		24.9885	79.5541		24.9757	43.2161
		24.8428	3.22466		24.8407	0.767823		25.0067	80.4626		24.994	43.2251
		24.8602	4.00718		24.8588	-0.183654		25.025	79.1502		25.0125	42.5649
		24.8785	5.62092		24.8765	0.072654		25.0432	81.1562		25.0307	42.3032
		24.8967	4.08731		24.8953	0.444644		25.0615	80.3217		25.0495	42.8953
		24.915	4.86249		24.9143	-0.795318		25.0797	77.5489		25.0673	41.1949
		24.9337	4.73889		24.9312	-0.390432		25.0977	79.4693		25.0857	42.5316
		24.9512	4.4461		24.95	0.591413		25.1162	78.1717		25.1035	43.1818
		24.9697	5.30089		24.9682	-0.204257		25.1347	80.0868		25.122	42.9067
		24.9882	4.12712		24.9865	-0.175337		25.1528	81.3691		25.1397	40.7201
		25.0062	5.21918		25.004	0.144595		25.1712	79.0414		25.1585	42.3423
		25.025	5.05		25.023	0.667689		25.1893	78.0375		25.1768	43.8777
		25.0427	4.65456		25.0405	-0.127261		25.2077	79.4179		25.195	42.6112
		25.0608	6.03574		25.0593	-0.856773		25.2258	79.0641		25.2132	42.9353
		25.0792	5.57168		25.0775	-0.871233		25.244	78.4787		25.2315	42.4024
		25.0967	4.94525		25.0958	0.0816916		25.2622	79.4226		25.2497	42.932
		25.1158	4.45971		25.114	-0.678196		25.2803	76.7772		25.2685	43.1994
		25.1343	4.43981		25.132	-0.229563		25.2987	78.6663		25.2867	43.4087
		25.1525	4.10826		25.1505	0.0151733		25.3168	79.4173		25.3047	42.706
		25.1703	3.64525		25.1693	0.708175		25.3352	80.52		25.3228	41.3489
		25.189	5.19614		25.187	-0.317771		25.3533	78.3546		25.3413	42.5959
		25.2067	4.62785		25.2045	0.809764		25.3715	78.2424		25.3593	43.9111
		25.2248	3.58659		25.224	-0.21691		25.3898	81.4465		25.3775	42.4153
		25.2428	3.27494		25.241	0.246536		25.4073	80.0588		25.3958	43.2619
		25.2613	3.81547		25.2598	0.0563863		25.4262	80.8117		25.4148	43.239
		25.2793	3.32575		25.2775	-0.461293		25.4445	78.8032		25.4327	43.7328
		25.298	2.72498		25.2963	0.652509		25.4627	78.6436		25.451	43.6751
		25.3165	3.79714		25.314	-0.128708		25.481	78.4126		25.4692	42.5521
		25.3342	4.64932		25.3328	-0.984027		25.4992	77.6851		25.4875	42.9096
		25.3522	3.79924		25.3503	0.402344		25.5175	77.0362		25.5057	41.9262
		25.3707	4.67289		25.3695	0.15616		25.5357	78.5895		25.5238	43.8896
		25.3892	4.79755		25.3878	-0.647828		25.5545	78.7257		25.5428	42.7222
		25.4072	4.49952		25.4057	0.0267386		25.5723	76.2452		25.561	41.4118
		25.4257	2.93292		25.424	1.11559		25.5907	78.1577		25.5785	42.2312
		25.4437	3.26866		25.4415	-0.182567		25.6088	80.221		25.5968	42.5168
		25.4613	4.59013		25.4598	-0.156181		25.6262	78.7284		25.6152	41.542
		25.4803	4.42357		25.4785	0.0712065		25.6452	75.9215		25.6327	41.4585
		25.4985	4.17426		25.4968	-0.25993		25.6635	77.1804		25.6515	42.5697
		25.5165	3.64158		25.515	-0.333679		25.6817	79.3919		25.6697	42.7246
		25.5348	3.34146		25.5333	-0.750129		25.7	79.7177		25.6885	42.1483
		25.553	3.47502		25.5508	0.721195		25.7182	78.3779		25.7062	43.2218
		25.5715	3.68925		25.5697	0.445724		25.7365	76.902		25.7247	43.3553
		25.5895	3.04867		25.5885	-0.0853278		25.7547	77.5275		25.7427	43.0678
		25.6082	4.58751		25.6062	0.160495		25.7728	81.6094		25.7608	42.6669
		25.626	3.3158		25.6245	-0.668071		25.791	78.0088		25.7797	41.694
		25.6438	4.48171		25.6433	0.591773		25.8093	77.7151		25.7978	42.5878
		25.6628	3.81338		25.661	-0.21655		25.8275	78.4287		25.8155	42.0725
		25.68	5.53187		25.6785	0.214361		25.8458	80.1649		25.8333	43.065
		25.6992	5.03167		25.6975	0.118922		25.864	77.7638		25.8523	40.99
		25.7173	4.15017		25.7157	-0.480088		25.8823	77.368		25.8698	43.5045
		25.7353	4.62889		25.7338	0.233163		25.9005	79.725		25.8882	42.6688
		25.7535	4.63361		25.7515	-0.0274871		25.9187	78.0262		25.9067	42.9139
		25.772	4.2544		25.7697	0.51477		25.9368	78.6182		25.9255	40.6072
		25.7898	3.31318		25.7883	-1.05452		25.9542	79.7383		25.9435	42.0944
		25.8085	4.33767		25.8073	1.44457		25.9737	76.378		25.9608	41.7541
		25.8265	3.98413		25.825	0.378846		25.9918	76.4802		25.9798	42.7647
		25.8447	3.50488		25.8432	-0.488406		26.0102	79.1262		25.9982	43.8353
		25.8628	3.82019		25.8608	-0.23137		26.0287	79.8164		26.0163	42.799
		25.8808	3.98204		25.8797	-1.03753		26.0465	77.3039		26.0352	42.7208
		25.8998	3.58449		25.8978	0.434519		26.0648	77.605		26.0528	41.7917
		25.9175	3.08429		25.916	0.839404		26.083	79.5541		26.0703	41.4099
		25.9358	3.94066		25.9348	0.201708		26.1005	79.211		26.0887	42.8914
		25.9535	3.82176		25.9525	-1.02741		26.1198	78.0242		26.1075	40.6067
		25.9722	3.96004		25.9713	-0.276198		26.1375	77.0723		26.1248	42.7661
		25.991	3.70967		25.9887	0.909537		26.156	78.0869		26.1438	42.441
		26.0087	3.73115		26.0073	0.491272		26.1742	78.5942		26.1622	42.9348
		26.0268	2.99996		26.0248	0.0592741		26.193	76.6664		26.1803	42.6107
		26.0457	4.9463		26.0437	1.08631		26.2107	77.4421		26.1993	40.9919
		26.0633	3.81547		26.0613	-0.0726752		26.2282	79.211		26.2178	42.8586
		26.0815	3.43888		26.0807	-0.290658		26.247	79.9219		26.2347	43.1822
		26.1003	4.64932		26.0987	0.0715666		26.2648	76.9314		26.2535	43.0164
		26.1183	4.54875		26.1163	-0.98258		26.2835	78.4667		26.2718	42.0763
		26.1358	3.66672		26.1348	-0.447913		26.3017	78.3519		26.29	42.5673
		26.1545	5.11705		26.1535	-0.24475		26.32	76.9568		26.3082	42.1907
		26.1733	4.08941		26.1713	-0.0245922		26.3382	78.2691		26.3265	41.9662
		26.1915	4.6907		26.1888	1.0986		26.3565	77.4988		26.3447	41.7298
		26.2092	3.39646		26.2077	-0.66735		26.3747	79.1489		26.363	42.1297
		26.2275	4.44086		26.226	-1.9684		26.3928	80.1929		26.3812	40.1901
		26.2457	4.20988		26.2435	-0.734229		26.411	77.2538		26.3995	43.2032
		26.2638	3.39174		26.2618	-0.767845		26.4295	78.3732		26.4177	43.0302
		26.2823	4.02289		26.2807	-1.28624		26.4477	76.645		26.4365	41.5229
		26.3002	3.68349		26.2995	0.0690389		26.4662	77.6857		26.454	43.1641
		26.3188	4.76508		26.3172	1.35708		26.4843	76.617		26.4725	41.9438
		26.3367	4.3801		26.3347	0.234604		26.5025	79.7584		26.4908	42.0787
		26.355	3.27285		26.3537	-0.24475		26.5208	77.5182		26.5087	42.0549
		26.3732	3.73167		26.3723	0.214721		26.539	79.9199		26.527	43.1045
		26.3915	3.98151		26.39	1.14524		26.5572	79.5187		26.5452	41.7264
		26.4097	4.92378		26.4077	0.304377		26.5753	77.097		26.5635	41.4786
		26.428	2.68412		26.4265	-0.360432		26.5937	78.7791		26.5817	41.9829
		26.4457	4.17164		26.4447	-0.0282073		26.612	78.7758		26.5998	41.9409
		26.465	3.89299		26.4623	-0.894011		26.6302	76.4548		26.6182	40.7959
		26.4832	4.23502		26.4812	0.219784		26.6483	78.7811		26.6363	42.819
		26.5008	2.91563		26.4988	-0.611317		26.6668	78.2998		26.6547	41.6769
		26.5193	4.34239		26.5177	0.435239		26.685	77.9574		26.6735	41.5992
		26.5378	3.77515		26.5365	0.158688		26.7033	78.942		26.6912	42.9987
		26.5555	4.48433		26.5542	-0.824605		26.7212	79.1796		26.7098	40.5671
		26.574	5.57639		26.5728	0.638769		26.74	79.0975		26.7278	40.9866
		26.5917	3.60335		26.591	-0.0321824		26.758	77.7952		26.746	42.1926
		26.6102	3.35665		26.6087	-0.754112		26.7762	78.5682		26.7633	42.094
		26.6283	4.6137		26.627	-0.912086		26.7945	78.4587		26.7818	41.9939
		26.6467	3.44464		26.6447	-0.21547		26.8135	80.022		26.8007	41.2197
		26.6652	3.20895		26.664	0.364385		26.8313	77.9267		26.8195	42.8362
		26.6832	2.91092		26.6817	-0.472858		26.8497	78.462		26.838	42.5888
		26.7017	4.18893		26.6993	0.160135		26.8678	79.1489		26.8547	42.338
		26.7195	5.09505		26.7175	0.275457		26.8862	78.2711		26.8735	40.3993
		26.7378	3.91552		26.7362	0.782284		26.9043	77.898		26.8918	41.5424
		26.7567	3.45669		26.7552	0.190863		26.9225	77.0876		26.91	42.2827
		26.7745	4.58908		26.7728	1.40516		26.9408	76.7772		26.9275	42.8176
		26.792	3.3975		26.7912	-0.42116		26.9593	77.5515		26.9465	42.0525
		26.8108	3.85633		26.8087	0.494527		26.978	77.6276		26.9647	42.2837
		26.829	3.92232		26.8275	0.0563863		26.9955	77.5502		26.9828	41.6554
		26.8472	3.96266		26.8457	0.362938		27.014	78.5722		27.0003	43.0092
		26.8653	3.4766		26.864	-0.301143		27.0322	78.1937		27.0195	42.554
		26.8838	4.09307		26.8828	-0.923292		27.0503	75.3027		27.0377	40.5891
		26.9018	3.3996		26.9007	0.997379		27.068	74.5517		27.0565	41.102
		26.9203	3.24928		26.9188	0.0903691		27.0868	79.7931		27.0743	42.7504
		26.9385	2.99944		26.9372	-0.841233		27.1052	77.1737		27.0925	41.6378
		26.9565	3.32889		26.9553	-0.749049		27.1228	78.2491		27.1108	39.9784
		26.9747	3.31056		26.973	-0.099788		27.1418	78.5368		27.129	40.9123
		26.9932	3.19009		26.9912	-0.532146		27.1598	79.9546		27.1473	40.0185
		27.0112	3.37393		27.01	-0.314156		27.178	78.4574		27.1655	40.4208
		27.0295	2.85226		27.0282	-0.476833		27.1962	76.6651		27.1837	41.4628
		27.0478	2.58042		27.0468	-0.534314		27.2145	78.167		27.202	40.804
		27.0662	2.28554		27.0642	-0.460926		27.2327	77.7004		27.2203	40.8956
		27.0842	2.89154		27.0835	0.71179		27.251	78.6463		27.2387	41.5067
		27.1023	3.18956		27.1012	-0.449		27.2695	76.0356		27.2568	41.5024
		27.1203	3.05443		27.1188	0.31631		27.2877	75.8988		27.2753	41.1239
		27.1388	4.98925		27.137	-0.00977193		27.3057	79.472		27.2933	41.6373
		27.1573	3.91918		27.1558	-0.866538		27.3242	77.4948		27.3122	40.8765
		27.1752	4.6488		27.1742	-1.26889		27.3413	79.3378		27.33	41.9981
		27.1942	3.69396		27.1923	-0.375612		27.3605	76.6704		27.348	40.9738
		27.2117	2.99525		27.2102	-0.552389		27.3788	78.454		27.3663	43.6413
		27.2298	2.20749		27.2292	0.33113		27.397	78.7277		27.3845	40.2463
		27.2482	4.45971		27.247	0.606234		27.4147	77.6543		27.4018	41.8999
		27.2667	4.56918		27.2647	-0.751217		27.4332	75.7038		27.421	41.5844
		27.2845	3.20476		27.2837	-0.186182		27.4517	75.3621		27.4398	42.8962
		27.3028	3.5164		27.302	0.130855		27.4698	77.6824		27.4573	42.6059
		27.3212	3.91918		27.3198	-0.058215		27.488	76.5296		27.476	41.2397
		27.34	3.48183		27.3375	0.306185		27.5057	77.3139		27.4938	40.3798
		27.357	3.59968		27.3557	0.421866		27.5247	76.4575		27.5122	41.0672
		27.376	3.52426		27.3745	0.30257		27.5432	77.087		27.5305	41.3093
		27.394	2.85959		27.3928	-0.680363		27.5613	76.85		27.5493	39.8841
		27.4122	3.66777		27.4105	-0.303671		27.5795	74.9596		27.567	40.9709
		27.431	2.34996		27.4298	0.376678		27.5972	76.7845		27.585	39.9813
		27.4487	4.12712		27.4472	-0.551302		27.6153	77.6003		27.6038	42.0553
		27.4668	3.33518		27.4658	-0.954747		27.6343	77.1277		27.6208	40.949
		27.4853	3.8139		27.484	-0.648188		27.6518	76.9808		27.6405	41.3675
		27.5033	2.65637		27.5022	-0.0260396		27.6707	77.0129		27.6588	40.4361
		27.5213	3.32994		27.5205	-1.05163		27.689	75.7045		27.6763	41.4295
		27.5395	4.08836		27.538	-0.0712277		27.7072	76.7499		27.695	39.5194
		27.558	4.46757		27.5563	0.0151733		27.7253	79.0735		27.7128	41.2007
		27.5762	3.1419		27.5752	0.045181		27.743	77.0436		27.7312	39.1004
		27.5945	2.5579		27.5933	0.0299936		27.7618	78.0622		27.75	42.6298
		27.6132	4.0915		27.6115	-0.375612		27.78	79.2557		27.7675	41.2922
		27.6315	4.07893		27.6298	-0.360792		27.7983	76.2172		27.7858	42.2117
		27.6498	3.39803		27.6473	-0.880998		27.8165	76.4007		27.8038	40.4089
		27.668	3.62796		27.6657	0.433071		27.8348	77.6764		27.8222	41.0853
		27.6858	5.11652		27.6845	-1.67848		27.8528	75.6792		27.8405	42.4949
		27.7038	2.84964		27.7027	-0.0314622		27.871	79.448		27.8587	40.9704
		27.7225	3.22781		27.7208	-1.1702		27.8905	76.7739		27.8768	39.1814
		27.7402	2.05822		27.7392	-1.09898		27.9082	75.8894		27.8952	40.1119
		27.7588	1.65491		27.7575	0.0983194		27.9265	76.5643		27.9133	39.8807
		27.7775	4.06636		27.7758	0.348845		27.9447	77.9274		27.9317	41.0648
		27.7945	2.24207		27.7938	-0.0603826		27.9628	76.3974		27.9498	39.0217
		27.8133	3.65048		27.8123	-1.24358		27.9812	76.057		27.9678	42.0968
		27.8317	3.27442		27.83	-0.947517		27.9987	75.5537		27.9863	39.7878
		27.85	3.22885		27.849	-0.837618		28.0175	77.1737		28.0045	39.9165
		27.8682	4.37905		27.867	0.249064		28.0358	76.888		28.0228	40.876
		27.8858	3.69186		27.8852	-0.346691		28.054	77.689		28.041	39.4036
		27.905	3.79819		27.9035	-0.24547		28.0722	77.8186		28.0592	39.7329
		27.9232	3.27232		27.9217	-0.314883		28.0905	76.856		28.0775	42.0339
		27.9408	2.9722		27.9393	-0.401645		28.1087	76.832		28.0957	41.2979
		27.9592	3.20004		27.9582	-0.173529		28.1267	77.4548		28.114	40.6782
		27.978	4.68651		27.976	-0.262098		28.1448	77.388		28.1323	41.7097
		27.9958	2.26406		27.9948	-0.516599		28.163	77.2839		28.1507	40.1505
		28.0138	2.03361		28.0122	-0.884613		28.1817	75.1298		28.1688	41.4442
		28.0327	2.56052		28.0312	-0.635895		28.1992	78.6149		28.187	41.5215
		28.0502	3.8998		28.0493	-0.433453		28.2188	77.5729		28.2047	41.4662
		28.0687	3.29066		28.0675	0.509715		28.2357	73.5177		28.2228	41.1206
		28.0867	3.79295		28.0852	0.15616		28.2547	75.286		28.2423	40.2606
		28.1052	3.10262		28.104	-0.983667		28.2725	78.9427		28.2602	42.002
		28.1233	3.70601		28.1228	-0.311989		28.2915	77.3112		28.2785	40.7807
		28.1417	3.50331		28.1403	-0.574079		28.3092	77.2071		28.2967	40.0352
		28.159	2.6836		28.1593	-0.0274871		28.3275	76.4068		28.315	39.526
		28.1778	4.19154		28.1768	-0.516959		28.3457	78.0288		28.3333	43.1636
		28.1967	2.87268		28.1945	-0.478641		28.3632	77.1437		28.3513	40.9871
		28.2148	2.28816		28.213	-0.575887		28.3822	77.0943		28.37	39.977
		28.2325	2.63751		28.2317	-1.10116		28.401	77.0396		28.3878	39.7339
		28.2508	4.03179		28.2492	-0.430198		28.4193	76.6991		28.4062	39.9403
		28.2688	2.61813		28.2683	-0.357537		28.4373	78.2931		28.4243	40.263
		28.2872	2.76322		28.2862	-0.522021		28.4555	76.7785		28.4433	42.8204
		28.3048	1.84609		28.3038	-0.0574877		28.474	76.352		28.4598	41.8299
		28.3238	2.34263		28.3227	-0.0730353		28.492	74.033		28.4793	41.2555
		28.3418	2.1614		28.3403	-0.505033		28.5102	75.5423		28.4978	39.8702
		28.36	3.51692		28.3585	-1.45687		28.528	78.0829		28.5167	40.8551
		28.3785	4.05222		28.3773	0.262444		28.5463	76.4221		28.5342	40.4952
		28.3965	4.40315		28.3962	-0.20173		28.5643	76.1898		28.5523	41.1563
		28.415	2.53014		28.4138	-0.421527		28.583	77.2538		28.5712	41.5849
		28.433	3.0361		28.4317	0.291004		28.601	76.5589		28.5887	40.5485
		28.4512	3.06072		28.45	0.736375		28.619	76.2939		28.6068	40.8207
		28.4695	2.36777		28.4685	-1.24286		28.6378	76.346		28.6262	39.7072
		28.4877	2.45472		28.4867	0.491639		28.6565	77.1784		28.6442	38.2638
		28.5058	3.8558		28.505	-0.0451952		28.675	75.1204		28.662	40.8184
		28.5235	3.52112		28.5232	-0.726999		28.6927	78.1069		28.6803	40.7773
		28.5423	3.96527		28.5408	0.319197		28.7098	77.5842		28.6985	39.8616
		28.5612	3.28961		28.559	-0.692656		28.7283	77.2058		28.7168	39.139
		28.5793	3.37498		28.5778	-0.188357		28.7473	76.9688		28.735	40.509
		28.5965	2.06084		28.5962	0.708902		28.7648	74.6305		28.7537	39.8297
		28.6155	3.14033		28.6145	0.290637		28.783	75.8367		28.772	41.061
		28.6332	3.43627		28.6327	-1.31733		28.8012	75.5163		28.7888	40.8331
		28.652	2.89101		28.6502	-0.563234		28.8202	76.6898		28.8078	39.711
		28.6702	2.07865		28.669	0.0766291		28.8385	76.6958		28.8262	41.2297
		28.6882	3.12671		28.6878	-0.572632		28.8565	76.0857		28.8442	40.5714
		28.7067	2.41386		28.7055	-0.707836		28.8742	76.2959		28.8625	39.9775
		28.7247	3.0602		28.7232	-0.721576		28.8932	76.2465		28.88	39.6919
		28.7432	3.35246		28.7422	-0.0592953		28.9113	78.4587		28.8998	41.1992
		28.7612	3.72696		28.7602	-0.271136		28.9297	76.7251		28.9175	40.9308
		28.7798	3.28699		28.7778	-0.0990608		28.947	76.107		28.9357	41.1034
		28.7977	3.15971		28.7967	-0.99704		28.9665	74.7419		28.954	40.1119
		28.8158	2.64013		28.8145	-1.48905		28.9845	77.2258		28.9722	40.4933
		28.834	2.72446		28.833	-0.232097		29.0035	77.4708		28.9903	41.2049
		28.8522	3.60439		28.8507	-0.462373		29.021	77.7084		29.009	38.7248
		28.8698	3.97784		28.869	-0.564682		29.0392	76.2118		29.0268	39.8469
		28.8888	3.16861		28.8877	-0.361879		29.057	76.593		29.0452	40.5915
		28.9063	3.85423		28.9065	0.377765		29.0752	74.796		29.0638	39.8631
		28.9248	3.93332		28.9242	-0.176784		29.0942	74.4616		29.0813	40.0714
		28.9428	3.87728		28.9425	-0.720489		29.1123	74.6925		29.1	40.7597
		28.9615	3.22728		28.9607	-1.15755		29.1303	76.7719		29.1188	40.0189
		28.9798	3.122		28.9783	-0.390072		29.1487	77.412		29.1368	40.9065
		28.9983	2.25725		28.9972	0.219063		29.1663	74.262		29.155	40.5843
		29.0165	3.05862		29.016	-0.579862		29.1853	77.3927		29.1735	39.8264
		29.0345	3.22571		29.0335	-0.187629		29.2035	74.9068		29.1917	39.3692
		29.053	2.74803		29.0518	0.231716		29.2217	75.8667		29.2093	40.0752
		29.071	4.05903		29.07	-0.504306		29.24	75.7606		29.2282	40.5671
		29.0892	3.50069		29.0883	-0.666623		29.2582	76.4254		29.2463	39.732
		29.1068	3.10367		29.1065	-1.15213		29.2757	77.7425		29.2647	39.2324
		29.1257	3.11991		29.1248	-0.764957		29.2945	76.2913		29.2828	40.2478
		29.1438	2.60032		29.1423	-0.466715		29.3128	75.1718		29.3002	39.5432
		29.1625	3.08429		29.1605	-0.258123		29.3312	75.0991		29.3193	40.0538
		29.1803	3.0602		29.1793	-0.489126		29.3492	77.8706		29.3378	39.6924
		29.1992	3.47712		29.198	-0.300783		29.3673	78.159		29.3552	40.5276
		29.2168	3.26918		29.2153	0.00504836		29.3863	76.0036		29.3743	39.0265
		29.235	3.14505		29.2342	-0.708556		29.404	74.6939		29.3922	39.9055
		29.2532	2.30177		29.2528	-0.64674		29.4223	77.2625		29.4105	39.9613
		29.2715	2.36777		29.2705	-0.317411		29.4403	75.7052		29.4285	40.8741
		29.2903	3.02982		29.2883	-0.04122		29.4587	72.8135		29.4463	41.2531
		29.3087	2.95806		29.3067	-0.330064		29.4768	74.5938		29.4652	39.3273
		29.3262	2.61237		29.3252	-0.970647		29.4952	76.9368		29.4838	40.09
		29.345	3.93699		29.3435	-0.200282		29.5133	76.7525		29.5018	38.9602
		29.3627	2.87164		29.3617	-1.15538		29.5317	76.8854		29.5202	39.5985
		29.3808	3.87518		29.3798	-0.0148344		29.5498	76.4822		29.5383	39.4979
		29.3992	2.58252		29.3975	-0.114968		29.5678	76.5156		29.5565	41.5987
		29.4168	2.22582		29.4158	-0.158349		29.5867	75.3601		29.5747	38.9993
		29.4355	3.35246		29.4345	-0.4208		29.6043	74.1579		29.5935	38.4535
		29.4537	2.22635		29.4533	-0.173529		29.623	76.3754		29.6115	40.4151
		29.472	1.98961		29.471	-0.910999		29.6415	74.0264		29.6297	40.1715
		29.4902	2.70246		29.4893	0.242561		29.6595	75.6298		29.648	38.5279
		29.5078	3.28961		29.5068	0.218336		29.6783	77.1971		29.6653	38.2609
		29.527	3.838		29.5258	-0.233905		29.6955	74.6405		29.6845	39.7501
		29.545	2.72498		29.5445	-0.27331		29.7145	74.9075		29.702	37.9354
		29.563	2.6616		29.5622	-0.303311		29.7327	77.2699		29.7203	39.7339
		29.5817	3.03505		29.5798	-0.246558		29.7507	75.4108		29.739	38.3963
		29.5995	3.67091		29.5993	0.186888		29.7692	75.7092		29.7573	39.5408
		29.6178	2.82607		29.6163	-1.31625		29.7867	77.0215		29.7755	39.9823
		29.6367	2.02837		29.6352	-0.246197		29.8055	75.792		29.794	39.0837
		29.6548	2.89259		29.653	-0.445385		29.8238	76.583		29.8128	38.5694
		29.6725	3.33046		29.6715	-0.986195		29.842	76.1838		29.8305	41.1625
		29.6908	2.6218		29.6892	-0.258483		29.8602	77.4681		29.8487	40.039
		29.7088	2.07236		29.7073	0.332577		29.8783	75.5697		29.867	38.6056
		29.727	2.28292		29.7262	-0.533594		29.896	75.4408		29.8852	39.5084
		29.746	1.97023		29.745	0.173148		29.9152	71.915		29.9035	40.2392
		29.7642	2.78207		29.7627	-1.80971		29.9332	74.1592		29.921	37.5388
		29.7818	3.22414		29.781	-0.144976		29.9518	74.1031		29.9405	39.3506
		29.8007	2.4521		29.7985	-0.200282		29.9697	73.7861		29.958	40.2082
		29.8183	3.41426		29.8175	-0.9974		29.9878	72.9563		29.9765	39.1762
		29.8365	2.39239		29.8357	-0.20209		30.005	75.2806		29.9945	39.3101
		29.8547	2.6019		29.8533	0.201348		30.0243	76.0336		30.0118	39.6195
		29.8733	2.51495		29.8722	-0.360432		30.0425	75.3601		30.031	39.9079
		29.8915	2.37248		29.8903	-0.144609		30.0607	74.4502		30.05	39.1776
		29.9097	2.05665		29.908	0.364746		30.0793	75.5023		30.0675	39.1223
		29.9278	1.86338		29.9267	-0.523829		30.097	74.9983		30.0857	39.9751
		29.9453	3.29013		29.9443	0.188335		30.1152	73.9122		30.1038	39.3678
		29.9642	2.54166		29.9627	-0.279813		30.1335	75.0397		30.1213	40.3793
		29.9825	3.46874		29.9815	-0.562147		30.1508	73.6726		30.1403	39.7859
		30.0005	2.47619		29.999	-0.811952		30.17	75.0991		30.1587	40.4561
		30.0188	1.82567		30.018	-0.633368		30.1877	76.5382		30.1773	40.3989
		30.0372	3.56144		30.0368	-0.286323		30.2067	74.5043		30.1942	39.0241
		30.0558	3.27023		30.0543	-0.228842		30.2248	72.6586		30.2133	39.7701
		30.0738	2.28344		30.072	-0.967759		30.2428	77.3613		30.2315	39.2887
		30.092	1.15733		30.0908	-0.850991		30.2612	76.1638		30.2498	39.6781
		30.1093	4.33872		30.109	-0.24511		30.2795	74.5791		30.2685	40.6038
		30.1283	3.12462		30.1273	-1.04006		30.297	76.6384		30.2857	39.8059
		30.1467	1.91942		30.1448	0.128687		30.3163	76.9334		30.3047	39.2324
		30.1642	2.87164		30.1632	-1.04006		30.3342	76.2112		30.323	39.7325
		30.1832	2.74122		30.182	-0.117863		30.3525	74.5604		30.3412	39.18
		30.2013	2.67994		30.1998	-1.25696		30.3698	75.4662		30.3593	39.1037
		30.2198	2.05717		30.2183	-0.0712277		30.3888	76.3513		30.3778	39.1771
		30.2375	2.24363		30.2367	-0.315964		30.4072	74.4816		30.3962	40.4508
		30.2552	2.68465		30.2545	0.173148		30.4257	72.6366		30.4143	39.9579
		30.2737	1.80157		30.2725	0.247624		30.4438	74.268		30.433	40.4713
		30.2922	1.83928		30.2913	0.158328		30.461	73.4102		30.451	39.7854
		30.3103	3.144		30.309	0.103022		30.4803	76.0242		30.4692	39.0837
		30.3282	2.43429		30.3278	-0.320666		30.4985	75.0991		30.4875	39.1538
		30.3472	2.34839		30.3463	-0.115689		30.5165	74.1692		30.5057	39.1948
		30.3652	3.40117		30.3645	0.00107322		30.535	72.8869		30.524	39.0446
		30.3837	2.36777		30.3825	-0.892924		30.5532	75.7365		30.5422	39.3082
		30.4015	2.83183		30.4007	-1.01186		30.5715	74.8034		30.5603	39.1171
		30.4197	2.82607		30.419	0.0477087		30.5897	74.8821		30.5787	40.2773
		30.438	2.97535		30.4372	-0.422968		30.6077	75.9141		30.5968	39.2343
		30.4565	3.00153		30.4548	-0.752664		30.6258	75.6217		30.6145	37.3057
		30.4745	2.3641		30.4737	-0.823518		30.6443	74.1539		30.6335	37.575
		30.493	3.18747		30.4925	-0.503946		30.6622	75.4148		30.6518	38.3582
		30.5115	1.2558		30.51	-0.923292		30.68	76.6918		30.67	40.2082
		30.5287	3.13929		30.5277	-0.417912		30.699	73.7627		30.6883	37.8457
		30.5475	3.12357		30.5465	-0.691929		30.7173	72.6359		30.7057	39.0641
		30.5653	2.45314		30.5642	0.259549		30.7345	74.7947		30.7247	38.3181
		30.5838	2.32901		30.5835	-0.695904		30.754	76.6697		30.7435	39.1037
		30.6022	2.38872		30.6012	-1.02705		30.7727	75.6571		30.7612	40.0709
		30.621	3.18328		30.6188	-0.737844		30.7897	76.583		30.7795	39.2343
		30.6385	2.20173		30.6377	-0.738204		30.8083	73.0605		30.7977	39.3292
		30.6568	1.87961		30.6567	0.53646		30.8267	75.7326		30.8167	37.9187
		30.6752	2.66003		30.6742	0.263524		30.8448	75.0704		30.8347	40.7011
		30.6938	2.6768		30.6923	0.118202		30.862	74.4776		30.853	40.4332
		30.7115	2.74227		30.7107	-0.387544		30.8815	74.5383		30.8712	38.7195
		30.7297	2.39186		30.7288	-0.605167		30.8995	77.0496		30.8888	38.8563
		30.748	1.6811		30.747	-0.924739		30.9178	74.0557		30.9073	38.5264
		30.7667	3.90242		30.765	-0.607702		30.9358	73.6532		30.9258	39.0127
		30.785	1.51035		30.7828	0.970266		30.955	75.1244		30.944	36.3518
		30.8032	3.24194		30.802	-0.188717		30.9725	76.4815		30.9617	39.067
		30.8208	2.76374		30.82	-0.246197		30.9907	74.8274		30.9798	39.0217
		30.839	1.61406		30.8375	-0.217277		31.0088	74.8568		30.9982	38.3958
		30.8573	3.18171		30.8563	-0.846655		31.0272	75.7679		31.0163	39.3115
		30.8755	1.58682		30.8747	-0.27367		31.0453	74.3208		31.0347	38.6947
		30.8942	2.472		30.8935	-0.965225		31.0637	75.5917		31.0528	37.6527
		30.9123	3.18276		30.9105	-0.751577		31.0825	74.1078		31.071	38.0107
		30.9302	1.73872		30.9293	-0.678556		31.1005	74.798		31.0898	38.9049
		30.9485	4.1245		30.9468	0.678895		31.118	76.8894		31.1075	39.0408
		30.9667	2.32954		30.966	-0.795685		31.1365	75.1485		31.1257	38.2176
		30.985	2.7695		30.984	-0.719041		31.1548	71.8663		31.144	38.7171
		31.0033	1.9917		31.0022	-0.648188		31.173	74.6692		31.1628	37.9759
		31.0215	3.43836		31.0205	-0.779417		31.1912	73.7607		31.1803	38.914
		31.0397	2.61447		31.0387	-0.200282		31.2095	74.3802		31.1987	39.8855
		31.0573	1.67325		31.0568	-0.740372		31.2277	73.7554		31.2168	39.9412
		31.0765	1.80262		31.0745	-0.464181		31.2458	75.1184		31.2352	38.6413
		31.0943	2.516		31.0927	-0.83545		31.2647	74.3641		31.2535	38.2628
		31.1125	2.5579		31.1115	0.376318		31.2828	76.4722		31.2722	38.1885
		31.1308	3.30846		31.1302	0.261357		31.3012	75.2252		31.2902	39.9036
		31.1495	2.99525		31.148	0.233524		31.3193	72.9917		31.308	37.5564
		31.1672	2.32377		31.1663	-0.795318		31.3373	75.8187		31.3263	38.587
		31.1855	3.72696		31.1845	0.53502		31.3562	72.5792		31.3445	39.0427
		31.2033	2.57361		31.2027	-1.41566		31.374	78.1617		31.3627	40.7068
		31.2218	2.20383		31.2203	-0.126174		31.392	76.0049		31.381	38.8329
		31.2402	1.76072		31.2385	-0.673493		31.4102	76.9107		31.399	37.4205
		31.258	2.86954		31.2573	-1.24576		31.428	73.9202		31.4173	38.0765
		31.2765	2.66003		31.2757	-2.96399		31.4475	76.7766		31.4355	41.0081
		31.2948	1.61511		31.2938	-1.50567		31.4652	74.2179		31.4542	37.5144
		31.313	2.15617		31.312	-1.66618		31.4837	74.9883		31.472	39.7143
		31.3312	3.54311		31.3297	-1.035		31.5012	75.3067		31.4903	38.8568
		31.3498	2.78731		31.3485	-0.691208		31.52	75.0163		31.5092	38.9464
		31.3677	2.14045		31.3673	-0.739651		31.5383	72.6686		31.5268	39.3864
		31.3865	2.19807		31.385	0.0863869		31.5565	74.8781		31.5453	37.7838
		31.4042	2.23892		31.4027	-0.999935		31.574	74.9055		31.5635	38.9612
		31.423	2.89625		31.4213	-0.0708676		31.593	74.0003		31.5817	37.5597
		31.4405	2.95701		31.4402	-0.131596		31.611	75.4075		31.6	37.0077
		31.4593	2.61813		31.4578	-0.622883		31.6298	74.1085		31.6182	38.8139
		31.477	1.62454		31.4762	-0.578782		31.6475	73.258		31.6365	38.8782
		31.4953	1.78167		31.4938	0.244729		31.666	73.728		31.6538	39.3559
		31.5135	2.72393		31.5127	-0.608062		31.6833	73.4583		31.6728	38.8401
		31.5323	2.55895		31.5308	-0.200282		31.7023	73.3589		31.691	39.3487
		31.5503	2.05456		31.5485	0.277984		31.7203	76.1351		31.7097	38.3053
		31.5682	3.56354		31.5667	-0.534674		31.7388	73.3054		31.7267	37.3705
		31.5863	2.01423		31.5855	-0.705308		31.7563	74.8808		31.7465	39.1237
		31.6047	3.65101		31.6037	-0.681083		31.7753	73.7654		31.764	37.4639
		31.6228	3.92023		31.622	-1.63871		31.7935	74.6946		31.7822	38.0927
		31.6412	2.84283		31.6402	-1.11598		31.8117	75.5323		31.8003	38.1289
		31.66	2.30125		31.6585	0.242201		31.8298	76.2973		31.8187	39.0947
					31.6767	-0.80761		31.8487	75.4942		31.8375	38.7176
								31.8662	71.9244		31.8552	38.0116
								31.8847	72.74		31.8733	39.8149
								31.9023	73.4209		31.8915	38.1065
								31.9212	74.0511		31.9105	37.3495
								31.9398	74.8074		31.9272	40.5466
								31.9573	74.3982		31.9468	38.7052
								31.9758	75.2319		31.9645	37.3433
								31.9938	71.5692		31.9828	37.5597
								32.0123	73.0164		32.0013	38.4697
								32.0305	73.8909		32.0192	37.3219
								32.0487	73.9142		32.0373	38.2452
								32.0668	71.4644		32.0557	37.3838
								32.085	75.84		32.0745	37.8796
								32.1032	73.3048		32.0915	38.4125
								32.1222	72.3903		32.1105	37.708
								32.1398	74.0791		32.1295	37.3309
								32.1582	74.2934		32.147	35.8551
								32.1767	76.061		32.1653	37.9382
								32.1945	75.5436		32.1835	36.757
								32.212	73.1719		32.2008	37.1564
								32.231	73.0411		32.22	36.7374
								32.2485	73.0084		32.2382	39.2529
								32.2675	73.1145		32.257	37.922
								32.2862	74.7686		32.2745	37.3486
								32.3038	73.5905		32.2928	36.3208
								32.3225	74.2546		32.3112	39.2572
								32.3397	73.4603		32.3293	37.6737
								32.3585	75.3621		32.3475	37.748
								32.3768	74.0491		32.3658	37.3667
								32.3943	73.2013		32.384	37.7328
								32.413	75.8667		32.4028	36.2269
								32.431	74.6925		32.4205	37.748
								32.4497	73.7707		32.4383	40.477
								32.468	75.6792		32.4572	38.6232
								32.4855	73.0037		32.4757	38.741
								32.5045	74.8241		32.4933	36.6969
								32.5227	74.8728		32.5117	36.7665
								32.5407	72.7214		32.5302	38.0416
								32.5592	73.8201		32.548	36.1411
								32.5765	75.1438		32.5663	39.0246
								32.5953	74.4015		32.5845	39.0279
								32.6137	75.0684		32.6018	37.1641
								32.632	74.1539		32.6218	35.9943
								32.65	72.8749		32.6398	36.9086
								32.6685	74.6946		32.6577	37.4186
								32.6867	72.7994		32.6765	37.1188
								32.7042	75.3087		32.6942	38.3925
								32.7232	72.9817		32.7123	37.9468
								32.7412	74.6184		32.7307	36.6507
								32.7587	74.0791		32.7488	39.4584
								32.7778	73.0351		32.767	38.3034
								32.7953	74.8341		32.7853	37.4577
								32.814	73.8148		32.8035	38.147
								32.8325	72.5545		32.822	38.8306
								32.85	75.7839		32.8403	38.1975
								32.8688	73.3822		32.8588	38.4316
								32.8872	72.9643		32.8767	37.9592
								32.9055	73.2187		32.8943	35.7822
								32.9237	74.7787		32.9132	38.0355
								32.9418	71.6053		32.9315	36.8476
								32.9602	72.8535		32.9498	36.8328
								32.9783	76.6123		32.9678	38.1098
								32.9965	75.1718		32.9857	38.7004
								33.0148	73.0585		33.005	36.1259
								33.033	74.4215		33.0233	38.3362
								33.0515	74.3775		33.0407	37.1607
								33.0698	72.0458		33.0597	37.635
								33.088	73.7026		33.0772	38.3015
								33.1062	72.9536		33.0955	36.9658
								33.1245	75.2292		33.1137	36.7746
								33.1425	74.2353		33.1318	36.5706
								33.1608	72.5865		33.1502	37.0602
								33.1792	74.6966		33.1683	37.9344
								33.1973	75.5944		33.1868	36.2174
								33.2158	73.8107		33.2053	37.3676
								33.2342	71.692		33.2233	36.981
								33.2523	74.5617		33.2415	35.2688
								33.2703	75.4368		33.2598	37.8419
								33.2887	73.7867		33.278	38.4125
								33.3062	74.5918		33.2962	37.2942
								33.3252	72.9657		33.3145	37.6322
								33.3433	73.3248		33.3332	37.2341
								33.3617	73.5991		33.3515	35.7455
								33.38	73.2781		33.3692	35.8761
								33.3983	73.0678		33.3873	37.6103
								33.4163	75.2239		33.4055	35.3083
								33.4348	72.186		33.4238	35.4418
								33.4532	73.0091		33.442	37.708
								33.4713	71.7321		33.4603	36.2836
								33.489	73.4623		33.4785	38.0154
								33.508	70.5766		33.4968	37.0673
								33.5263	74.5824		33.515	36.6617
								33.5442	75.4642		33.5332	38.1828
								33.5627	74.2153		33.5513	36.0467
								33.581	71.933		33.5702	36.777
								33.599	73.3041		33.5878	39.0436
								33.6173	72.7247		33.6062	36.9686
								33.6353	72.2354		33.6243	37.5764
								33.6537	75.2813		33.6425	37.7509
								33.6713	74.4556		33.6608	37.4196
								33.69	76.6684		33.679	36.1626
								33.7085	74.4476		33.6972	35.6325
								33.7265	73.3829		33.7155	36.7927
								33.7448	73.1479		33.7337	36.6798
								33.7627	71.5425		33.7518	37.3671
								33.7823	73.3335		33.7702	38.1117
								33.8002	71.3516		33.7883	39.099
								33.8183	74.0237		33.8068	36.2374
								33.8367	73.198		33.8248	37.789
								33.8548	72.1546		33.8432	37.2904
								33.8723	71.8362		33.8613	35.4575
								33.8913	72.0725		33.8795	37.4439
								33.9097	72.2915		33.8978	36.1483
								33.928	73.3054		33.9165	37.3314
								33.9463	72.9263		33.9342	36.8314
								33.9652	71.8896		33.9525	37.083
								33.9825	71.7842		33.9707	37.1736
								34.001	71.4671		33.9885	35.9771
								34.0192	73.3094		34.0073	37.8486
								34.0375	74.0077		34.0253	36.9086
								34.056	74.5584		34.0437	36.9996
								34.0747	70.7395		34.0618	35.4151
								34.092	72.9303		34.08	35.4003
								34.1103	72.4757		34.0983	36.5658
								34.1285	72.7714		34.1165	35.4056
								34.1468	71.8289		34.1345	36.3985
								34.165	72.2942		34.153	37.0044
								34.1832	73.5144		34.1712	38.7433
								34.202	73.7587		34.1895	35.9609
								34.2197	73.7313		34.2077	36.2141
								34.238	72.4764		34.2265	36.9667
								34.2562	73.204		34.2442	36.9114
								34.2745	73.9496		34.263	35.1939
								34.2927	72.1099		34.2805	36.6612
								34.3107	73.463		34.2988	35.0438
								34.3292	71.2942		34.317	36.143
								34.3473	73.7647		34.3358	36.5072
								34.3662	69.4345		34.3535	37.5373
								34.3837	72.3335		34.3717	36.8538
								34.402	72.2381		34.3898	35.5762
								34.42	70.5246		34.4082	34.6572
								34.4385	74.4549		34.4263	37.5369
								34.4567	72.7441		34.4447	36.2017
								34.4738	72.9884		34.4632	35.5963
								34.4927	72.9643		34.4812	36.9281
								34.5113	72.4817		34.4993	36.2994
								34.5303	71.5372		34.5175	35.9128
								34.5478	73.8074		34.5357	37.4825
								34.566	73.202		34.554	35.7278
								34.5843	72.3669		34.5722	36.9801
								34.6025	71.626		34.5905	36.4886
								34.6207	72.1032		34.6087	36.7189
								34.639	71.8589		34.6268	38.2276
								34.6575	73.6272		34.6452	34.3159
								34.6757	72.2094		34.6633	37.044
								34.6937	73.4089		34.6815	35.5157
								34.7117	73.5998		34.6998	37.1774
								34.7307	71.8643		34.7187	34.8479
								34.7492	72.8842		34.7362	35.4966
								34.7665	70.7962		34.7548	36.429
								34.7852	73.0104		34.773	36.2956
								34.8042	72.3415		34.7912	37.0621
								34.8222	72.987		34.8097	38.1656
								34.8395	73.3061		34.8277	35.8251
								34.8582	72.5858		34.8458	36.451
								34.8765	71.682		34.8647	36.9272
								34.8947	73.3595		34.8823	36.4314
								34.9122	71.4284		34.9002	36.6593
								34.9313	72.0952		34.919	35.3474
								34.9497	70.3116		34.937	33.6509
								34.9677	72.5258		34.9552	34.2768
								34.9863	73.4656		34.9738	35.0757
								35.0047	72.198		34.9917	34.7668
								35.0228	72.0478		35.01	36.726
								35.041	72.449		35.0287	35.0428
								35.0593	72.0245		35.0465	35.8031
								35.0775	71.7067		35.0647	37.2156
								35.0963	72.3502		35.0837	35.5395
								35.114	73.0051		35.1007	35.0752
								35.1327	72.3148		35.1198	36.7741
								35.1503	71.7234		35.1382	36.6059
								35.1683	72.2047		35.1563	36.1468
								35.187	74.1585		35.1737	37.3867
								35.2052	72.4537		35.1928	34.4632
								35.2233	74.0811		35.2113	36.6826
								35.2415	71.6013		35.23	36.0906
								35.2598	72.2868		35.248	34.7163
								35.2782	74.3261		35.2658	35.6906
								35.296	72.7975		35.284	37.4815
								35.3137	70.8683		35.303	35.9361
								35.3327	73.997		35.3212	36.6221
								35.351	72.21		35.3398	33.3678
								35.3692	72.989		35.3567	35.4966
								35.3873	71.4577		35.3765	35.878
								35.4057	73.5678		35.3943	37.5802
								35.4235	72.4243		35.4123	37.0616
								35.442	72.8549		35.4298	34.4823
								35.4602	73.463		35.4487	36.7975
								35.478	71.4945		35.467	36.3895
								35.497	73.4369		35.4852	35.7831
								35.515	73.5678		35.5025	35.745
								35.5333	72.9223		35.5222	34.5042
								35.5518	72.6867		35.5402	34.8545
								35.5697	72.2127		35.5583	37.2742
								35.5887	70.8944		35.5765	35.9338
								35.6068	71.5952		35.5948	34.7535
								35.625	72.0311		35.613	35.8017
								35.6433	72.401		35.6313	35.4604
								35.6608	72.6613		35.6487	37.3057
								35.6798	72.184		35.6678	35.6096
								35.6987	71.4931		35.686	34.6424
								35.7152	71.5465		35.7045	35.765
								35.7345	72.7134		35.7223	36.0329
								35.7527	70.0947		35.7412	34.9017
								35.771	73.22		35.7583	34.3369
								35.7892	74.5083		35.7782	34.3779
								35.8067	73.6492		35.7958	35.0614
								35.8257	73.8648		35.8145	37.708
								35.8437	71.6714		35.8323	33.3253
								35.8623	73.1406		35.8508	35.5605
								35.8805	72.5271		35.8687	36.03
								35.8988	71.4878		35.8862	35.6911
								35.917	71.1674		35.9052	37.0769
								35.9352	71.0846		35.924	36.2603
								35.9535	74.4716		35.9417	35.2878
								35.9717	71.2735		35.9598	35.8589
								35.9898	72.2908		35.9782	35.9171
								36.0082	72.2347		35.9963	36.7408
								36.0265	69.05		36.0147	36.2794
								36.0442	72.7387		36.0328	34.1505
								36.0642	73.459		36.0513	35.9371
								36.0825	73.5397		36.0693	35.0209
								36.1007	70.8463		36.0875	35.3899
								36.1188	72.2381		36.1057	34.5452
								36.1368	71.1714		36.1247	35.1177
								36.1553	71.4617		36.1422	35.3999
								36.1733	71.6179		36.1603	34.0885
								36.1917	71.0692		36.1792	33.7758
								36.21	71.9424		36.1968	35.1539
								36.2282	72.4831		36.215	34.3569
								36.2465	71.8603		36.2333	35.1362
								36.2647	70.5312		36.2515	34.672
								36.2833	70.1341		36.2698	35.4976
								36.3012	72.5605		36.288	35.6525
								36.3193	72.1306		36.3063	36.164
								36.3373	70.5352		36.3245	34.8541
								36.3558	71.5712		36.3427	33.5923
								36.374	70.5512		36.3608	35.4943
								36.3923	69.7302		36.3792	33.8044
								36.4112	73.0404		36.397	36.2598
								36.4287	70.9758		36.4158	35.254
								36.447	74.2126		36.4342	34.7892
								36.465	74.246		36.4523	35.0142
								36.4827	71.6794		36.4705	35.4185
								36.5017	74.266		36.4888	34.5223
								36.5198	71.164		36.507	34.3354
								36.5383	72.1493		36.5252	34.507
								36.5563	72.3749		36.5435	33.3034
								36.5747	70.5099		36.5617	34.6777
								36.5925	71.2755		36.58	36.3709
								36.6115	70.2862		36.598	35.3446
								36.6298	71.8075		36.6163	34.5232
								36.648	72.8769		36.6347	35.8613
								36.6662	69.7222		36.6528	35.7655
								36.6845	72.2141		36.6712	33.1699
[truncated: 7,040 more rows]
