# Supplementary material for: The nucleosomal acidic patch relieves auto-inhibition by the ISWI remodeler SNF2h
Source: eLife. 2018 Apr 17;7:e35322. doi: 10.7554/eLife.35322 (PMC5976439; doi:10.7554/eLife.35322)
Supplement: Figure 2—figure supplement 3—source data 1. [file elife-35322-fig2-figsupp3-data1.xlsx]

## Sheet: Sheet1
		kobs (min^-1)
	Enzyme	WT						2RA
	Nucleosome	WT			APM			WT			APM
	[SNF2h]
	31.25	0.6058	0.6468	0.8285				0.4602	0.3356	0.431
	62.5	0.9267	1.195	1.64				1.596	0.7561	0.3592
	125	1.66	2.039	1.463				2.175	1.527	1.782	0.01757	0.04055	0.03376
	250	2.127	2.857	2.175	0.002383	0.008877	0.004911	3.269	2.678	2.662	0.0526	0.1107	0.1246
	500	2.16	2.604	2.448	0.003352	0.009269	0.01164	3.765	3.423	3.771	0.1177	0.2164	0.2384
	1000	2.644	2.135	2.167	0.005436	0.01292	0.01217	3.837	3.752	4.826	0.1811	0.226	0.4215
	2000				0.00725	0.01317	0.01146	4.264	3.902	4.461	0.2299	0.3629	0.5165
	4000				0.004958	0.01251	0.01573				0.3445	0.4731	0.5462
	8000				0.007623	0.01292	0.01636				0.4327	0.4866	0.723
