# Supplementary material for: The nucleosomal acidic patch relieves auto-inhibition by the ISWI remodeler SNF2h
Source: eLife. 2018 Apr 17;7:e35322. doi: 10.7554/eLife.35322 (PMC5976439; doi:10.7554/eLife.35322)
Supplement: Figure 2—source data 1. [file elife-35322-fig2-data1.xlsx]

## Sheet: Sheet1
	Panel E
	SNF2h	WT		2RA		mNegC
	Nucleosome	WT	APM	WT	APM	WT	APM
	kobs (min^-1)	2.135	0.007623	4.264	0.4327	2.283	1.127
		2.644	0.01292	3.902	0.4866	3.368	1.156
		2.167	0.01636	4.461	0.723	2.483	1.096
