# Supplementary material for: The nucleosomal acidic patch relieves auto-inhibition by the ISWI remodeler SNF2h
Source: eLife. 2018 Apr 17;7:e35322. doi: 10.7554/eLife.35322 (PMC5976439; doi:10.7554/eLife.35322)
Supplement: Figure 3—source data 1. [file elife-35322-fig3-data1.xlsx]

## Sheet: Sheet1
Nucleosome/Enzyme:	WT/SNF2h	E64R/SNF2h	WT/2RA SNF2h	E64R/2RA SNF2h
Avg. wait duration:	17.8342	46.5159	11.7528	28.5538
S.E. wait duration:	2.366	4.3617	0.9797	2.5241
Avg. p1 duration:	18.965	34.5109	11.6822	17.4582
S.E. p1 duration:	1.4882	3.7676	0.926	1.4176
Avg. p2 duration:	23.3564	42.938	11.8804	24.4673
S.E. p2 duration:	2.8223	13.0921	1.4272	3.1292
Change in nucleosome position, wait->p1:	6.1894	3.2942	8.6486	8.8032
	2.7213	3.273	6.5075	10.8042
	8.1954	4.223	4.0389	9.6658
	12.4075	3.2025	6.7955	6.5933
	6.848	7.2396	8.3681	4.8373
	9.3441	6.0381	7.2241	3.2514
	9.355	4.4512	6.5237	8.7708
	6.8287	7.174	11.5854	10.4159
	5.0899	7.5418	6.0682	4.5995
	6.5759	7.9704	9.2946	6.1617
	12.9101	2.9043	8.4235	8.2152
	4.3384	3.3888	7.6789	7.3181
	12.0907	9.2044	7.9201	5.2943
	13.0253	4.6113	9.7933	13.8896
	10.0647	5.4101	8.4534	10.3237
	6.8696	6.1947	6.0295	4.4342
	11.41	2.8732	7.3439	4.7951
	10.0396	5.687	9.6991	7.1868
	6.8413	7.1864	3.4958	7.0778
	9.7406	6.572	7.4696	5.3531
	9.3319	6.4763	7.3825	4.6482
	11.9409	10.883	11.9982	6.1962
	4.4529	2.3608	14.6136	6.0918
	7.9313	9.4011	6.8652	8.3287
	4.9297	4.5736	5.3963	7.6326
	7.7508	5.4638	4.9837	4.5225
	5.827	7.6825	4.3371	9.8535
	3.6658	6.6129	6.2904	6.205
	8.5108	13.8686	8.8597	7.6709
	6.6973	3.0151	8.7365	9.8655
	6.1446	8.3371	7.2629	7.6589
	3.6874	10.4644	13.386	6.7866
	4.5388	6.4392	5.701	6.3302
	8.79	6.4209	7.9004	7.0193
	7.5697	5.3471	7.0485	7.3441
	4.4413	3.8789	10.0322	11.2805
	6.6646	11.314	11.8656	5.0283
	7.6785	4.8036	7.6523	5.6708
	10.8392	4.7609	8.9752	9.8507
	3.4415	7.0067	12.055	8.9946
	11.207	4.2422	11.8134	4.2893
	5.1034	3.8607	6.8426	3.9789
	10.8515	3.0444	8.1791	4.9896
	5.8458	8.1328	9.3397	5.5702
	6.8802	8.3402	12.9445	4.9806
	5.0179	6.3844	7.145	4.1445
	6.9551	8.5265	7.5104	1.7844
	9.7072	6.8857	18.8481	4.8514
	10.11	6.3198	10.7656	11.319
	8.7814	13.2354	7.0885	7.5772
	8.187	4.662	5.8177	10.4328
	5.2708	3.9255	7.4692	7.6643
	8.4146	3.1354	5.4045	9.7991
	8.6696	5.5737	9.5523	5.6623
	6.376	6.2121	7.7022	5.2533
	8.1279	3.999	9.526	7.2919
	7.2533	3.5252	8.7833	8.8261
	3.3811	4.4533	3.7152	5.1095
	2.8492	8.6987	5.8493	4.1422
	3.751	5.2996	6.5352	7.7406
	9.0791	2.951	3.9497	4.1393
	4.7247	3.0293	12.1447	4.2877
	5.2055	5.408	5.1738	5.4658
	11.877	4.2892	10.7372	5.2968
	2.3283	4.8051	7.8425	13.4868
	11.9994	6.042	9.687	7.628
	9.361	5.5121	9.2998	6.7709
	6.2607	8.4586	9.9742	7.2296
	3.4646	3.054	12.0264	9.8201
	8.341	7.9562	9.8489	7.6478
	12.3141	5.3931	10.6415	15.9919
	8.2847	5.1295	9.4879	18.2249
	2.9957	7.6924	8.5118	7.7812
	5.7678	3.7105	6.8517	4.8296
	11.7522	3.7451	7.0859	14.4261
	12.3231	3.7109	6.5208	4.4715
	6.8056	4.9108	14.9101	9.9429
	5.9277	3.3531	10.6763	6.1119
	7.9998	3.5521	9.5153	6.0658
	8.2659	3.1009	10.3459	6.4357
	4.6709	4.4039	10.0137	6.3272
	5.8707	8.5696	14.2219	9.479
	12.5439	11.1187	12.3101	9.0757
	5.4899	6.2792	8.7916	11.0208
	7.4363	4.0375	6.6983	8.57
	7.8432	11.3899	11.7853	6.9134
	9.3455	3.6968	9.1996	6.7064
	8.2081	4.4056	5.7884	8.1239
	5.8991	3.6855	6.4748	4.4946
	5.3717	3.1242	12.0525	14.6486
	6.5727	12.9187	9.6523	9.2335
	6.9624	8.4733	5.8049	7.1974
	9.4056	3.6776	10.4287	7.7495
	10.0668	6.5984	9.437	8.3474
	13.17	3.9036	9.7486	7.6883
	9.1521	0.5214	10.0691	4.2319
	10.5425	3.5297	5.1645	7.9247
	7.252		14.2945	3.1501
	5.546		4.6934	14.4599
	10.4425		11.2224
	11.1107		9.0885
	9.3654		7.9156
	7.5511		7.6015
	9.6026		8.6713
	9.8627		15.9251
	9.13		7.0101
	6.8856		4.4538
			6.8727
			9.1127
			6.6486
			7.5923
			7.9539
			5.2593
			10.5818
			3.862
			9.6004
			9.0687
			6.7325
			7.0194
			9.6225
			6.5866
			18.4953
			6.4878
			16.3782
			11.5124
Change in nucleosome position, p1->p2:	5.6621	3.8423	13.4901	6.8191
	4.7492	4.7756	4.8422	11.5056
	3.3742	3.243	5.0718	1.9227
	3.8136	3.2961	3.6758	3.5672
	4.1006	2.6174	6.2142	5.9573
	5.1363	3.2421	4.4252	7.2759
	5.7382	4.3107	6.3011	5.0583
	3.3042	3.5648	6.5605	3.5096
	6.7133	5.345	3.0216	4.6342
	7.4988	2.6833	5.842	2.9294
	5.745	6.3085	6.1192	4.4716
	6.8092	7.6369	6.2217	7.036
	3.9646	2.0762	6.5986	3.4536
	4.0837	1.7585	3.8608	5.1565
	5.8302	1.7663	6.6734	5.5377
	5.9564	7.2518	5.0938	8.6884
	5.4778	3.3357	5.527	4.2778
	5.9644	2.4492	3.844	10.5793
	4.3687	5.1484	7.1972	2.2576
	9.6234	8.509	3.9988	3.9957
	8.0972	5.4566	3.8753	5.4201
	4.4302	9.4504	5.7286	4.4914
	4.5443	3.8674	5.8044	5.9227
	4.0275		7.7083	3.8579
	4.2872		6.3749	5.9351
	4.5666		6.1179	6.6136
	5.3433		4.2847	2.5625
	7.2872		4.0073	10.3211
	3.0003		6.889	3.9857
	4.9543		4.9599	9.5328
	6.9041		4.9351	5.7864
	1.8536		5.5039	4.6599
	2.9045		8.194	4.0573
	2.4933		3.4168	3.349
	5.6165		4.176	4.9177
	3.1857		5.6726	11.3661
	5.0956		2.7584	4.2665
	4.1923		6.804	5.0168
	3.8367		7.7833	5.1081
	5.2382		4.9823	4.194
	5.401		5.5191	5.6815
	6.1509		4.222	5.7923
	2.6433		9.3856	3.2848
	3.9409		9.4966	3.0987
	7.757			5.0086
	6.4727			3.6473
	3.2508			3.9172
	6.9368			3.267
	5.8488
