# Supplementary material for: The nucleosomal acidic patch relieves auto-inhibition by the ISWI remodeler SNF2h
Source: eLife. 2018 Apr 17;7:e35322. doi: 10.7554/eLife.35322 (PMC5976439; doi:10.7554/eLife.35322)
Supplement: Figure 4—source data 1. [file elife-35322-fig4-data1.xlsx]

## Sheet: Sheet1
	Panel A
	Nucleosomes	WT	APM
	kobs (min^-1)	3.321	0.3542
		3.131	0.4442
		4.35	0.1467
	Panel B
	Nucleosomes	WT	APM
	kobs (min^-1)	0.4027	0.00269
		0.5262	0.00225
		0.3739	0.003895
