# Supplementary material for: The nucleosomal acidic patch relieves auto-inhibition by the ISWI remodeler SNF2h
Source: eLife journal article supplement (doi:10.7554/elife.35322), 2018-04-17
Supplement: supp [file elife_poa_e35322_Figure_1_figure_supplement_1.pdf › elife_poa_e35322_Figure_1_figure_supplement_1.pdf]

0/60:

5' – CTGGAGAATCCCGGTGCCGAGGCCGCTCAATTGGTCGTCGACAGCTCTAGCACCGCTTAAACGCACGTACGCGCTGTCCCCCGCGTTTTTAACCGCCAAGGGG...  
3' – GACCTCTTAGGGCCACGGCTCCGGCGAGTTAACCAGCATCTGTCTGAGATCGTGGCGAATTTGCGTGCATGCGCGACAGGGGGCGCAAAATTGGCGGTTCCCC...

...ATTACTCCCTAGTCTCCAGGCACGTGTCAGATATATACATCCTGTGCATCTATTGAACAGCGACCTTGCCGGTGCCAGTCGGATAGTGTTCCGAGCTCCCCT...  
...TAATGAGGGATCAGAGGTCCGTGCACAGTCTATATATGTAGGACACGTAGATAACTTGTCGCTGGAACGGCCACGGTCAGCCTATCAGAAGGCTCGAGGGTGA...

...CT-3'

...GA-5'

3/78:

5' – /5Cy5/GCCCTGGAGAATCCCGGTCTG**CAG**GCCGCTCAATTGGTCGTCGACAGCTCTAGCACCGCTTAAACGCACGTACGCGCTGTCCCCCGCGTTTTTAACCG...  
3' – CGGGACCTCTTAGGGCCA**GACGTC**CGGCGAGTTAACCAGCATCTGTCTGAGATCGTGGCGAATTTGCGTGCATGCGCGACAGGGGGCGCAAAATTGGC...

...CCAAGGGGATTACTCCCTAGTCTCCAGGCACGTGTCAGATATATACATCCTGTGCATCTATTGAACAGCGACCTTGCCGGTGCCAGTCGGATAGTGTTCCGAG...  
...GGTCCCCCTAATGAGGGATCAGAGGTCCGTGCACAGTCTATATATGTAGGACACGTAGATAACTTGTCGCTGGAACGGCCACGGTCAGCCTATCAGAAGGCTC...

...CTCCCCTCTAGAGGATCCCCGGGTACC-3'

...GAGGGTGAGATCTCCTAGGGGGCCCATGG/5Bioteg/-5'
