# Supplementary material for: The nucleosomal acidic patch relieves auto-inhibition by the ISWI remodeler SNF2h
Source: eLife journal article supplement (doi:10.7554/elife.35322), 2018-04-17
Supplement: supp [file elife_poa_e35322_Figure_1_figure_supplement_1_source_data_1.xlsx]

## Sheet: Sheet1
	Fraction ATP Hydrolyzed
Time (minutes)	WT Nucleosomes	APM Nucleosomes	No Nucleosomes
1	0.0485928	0.0394199	0.025544
2	0.0652271	0.0473273	0.0259112
3	0.0740605	0.0514784	0.015178
5	0.089598	0.0550923	0.0286381
10		0.0691385	0.0315721
15		0.0773792	0.0320843
