# Supplementary material for: The nucleosomal acidic patch relieves auto-inhibition by the ISWI remodeler SNF2h
Source: eLife journal article supplement (doi:10.7554/elife.35322), 2018-04-17
Supplement: supp [file elife_poa_e35322_Figure_1_source_data_1.xlsx]

## Sheet: Sheet1
Panel C				Panel D								Panel F
	Fraction End-positioned				kobs (min-1)								WT Nucleosomes	APM Nucleosomes	No Nucleosomes
Time (minutes)	WT Nucleosomes	APM Nucleosomes		[SNF2h]	WT Nucleosomes			APM Nucleosomes				kobs (min-1)	7.8768	0.65936	0.59192
0.25	0.440594			31.25	0.6058	0.6468	0.8285	-	-	-			6.8864	2.0384	0.18464
0.5	0.325272			62.5	0.9267	1.195	1.64	-	-	-			8.392	1.5288	0.16544
1	0.230094			125	1.66	2.039	1.463	-	-	-
5	0.203848			250	2.127	2.857	2.175	0.002383	0.008877	0.004911
20	0.13913			500	2.16	2.604	2.448	0.003352	0.009269	0.01164
15		0.593861		1000	2.644	2.135	2.167	0.005436	0.01292	0.01217
45		0.546458		2000	-	-	-	0.00725	0.01317	0.01146
90		0.482325		4000	-	-	-	0.004958	0.01251	0.01573
180		0.411908		8000	-	-	-	0.007623	0.01292	0.01636
390		0.333472
