# Supplementary material for: The nucleosomal acidic patch relieves auto-inhibition by the ISWI remodeler SNF2h
Source: eLife. 2018 Apr 17;7:e35322. doi: 10.7554/eLife.35322 (PMC5976439; doi:10.7554/eLife.35322)
Supplement: Supplementary file 1. [file elife-35322-supp1.xlsx]

## Sheet: ADP xlinks
m/z	z	ppm	Fraction	RT	Spectrum	Peptide 1	pep1.xlinked_aa	pep1.accession	pep1.modul	pep1.half_score	Peptide 2	pep2.xlinked_aa	pep2.accession	pep2.modul	pep2.half_score	ambig	scorediff	SVM score	source	spectral counts
1021.48	3	0.8	Z20170518-38_filtered	48.381	1	IDEAESLNDE(1298.6408)ELEEK+Incorrect Mono 1Da	831	snf2h	snf2h_hand	32.5	K(1743.7687)ANYAVDAYFR+Incorrect Mono 1Da	741	snf2h	snf2h_hand	22.9	unique	80.9	7.9	adp	3.7
1069.05	4	0.1	Z20170518-38_filtered	65.4	1	TPEEVIE(2417.2743)YSAVFWER+Incorrect Mono 1Da	884	snf2h	snf2h_sant	33.2	Q(Gln->pyro-Glu)TELFAHFIQPAAQK(1835.8730)TPTSPLK+Incorrect Mono 1Da	114	snf2h	snf2h_auton	31.1	unique	72.5	7.2	adp	7
1321.02	5	0.8	Z20170518-37_filtered	57.266	1	GGPEGVAAQAVASAASAGPAD(3327.5677)AEMEEIFDDASPGK	57	snf2h	snf2h1	60.4	3254.4674-GSMSSAAEPPPPPPPESAPSKPAASIASGGSNSSNK	1	snf2h	snf2h1	59.8	unique	66.9	6.6	adp	15.4
1106.35	6	-0.2	Z20170518-37_filtered	52.053	1	GGPEGVAAQAVASAASAGPADAE(3343.5627)M(Oxidation)EEIFDDASPGK	59	snf2h	snf2h1	64.7	3270.4623-GSM(Oxidation)SSAAEPPPPPPPESAPSKPAASIASGGSNSSNK	1	snf2h	snf2h1	62.8	positional variants	64	6.4	adp	13.7
950.786	3	0.9	Z20170518-39_filtered	43.294	1	Q(Gln->pyro-Glu)DSINAYNE(1285.6449)PNSTK+Incorrect Mono 1Da	549	snf2h	snf2h_reca2	24.1	SVC(Carbamidomethyl)LIGDK(1544.6743)EQR+Incorrect Mono 1Da	266	snf2h	snf2h_reca1	15.3	unique	65.4	6.3	adp	3
809.852	4	0.2	Z20170518-38_filtered	46.032	1	NFTMDTESSVYNFE(931.4433)GEDYR+Incorrect Mono 1Da	717	snf2h	snf2h4	16.9	K(2284.9219)TAEMNEK+Incorrect Mono 1Da	686	snf2h	snf2h_negc	7.7	unique	70.6	6.1	adp	4
1045.77	4	1.4	Z20170518-38_filtered	57.429	1	Q(Gln->pyro-Glu)TELFAHFIQPAAQK(1743.7687)TPTSPLK	114	snf2h	snf2h_auton	55.1	IDEAESLND(2417.2743)EELEEK	830	snf2h	snf2h_hand	52.6	unique	56.7	5.9	adp	2.8
1038.53	4	0.7	Z20170518-37_filtered	62.067	1	Q(Gln->pyro-Glu)TELFAHFIQPAAQK(1714.7897)TPTSPLK	114	snf2h	snf2h_auton	64.9	ESEITD(2417.2743)EDIDGILER	673	snf2h	snf2h_negc	47	positional variants	54.9	5.9	adp	1.8
1051.28	4	-0.2	Z20170518-38_filtered	51.617	1	QTELFAHFIQPAAQK(1747.7636)TPTSPLK+Incorrect Mono 1Da	114	snf2h	snf2h_auton	46.7	TEQEEDE(2434.3009)ELLTESSK+Incorrect Mono 1Da	154	snf2h	snf2h_auton	30.1	positional variants	56.1	5.9	adp	5.2
1051.28	4	-0.2	Z20170518-38_filtered	51.617	1	QTELFAHFIQPAAQK(1747.7636)TPTSPLK+Incorrect Mono 1Da	114	snf2h	snf2h_auton	46.7	TEQEED(2434.3009)EELLTESSK+Incorrect Mono 1Da	153	snf2h	snf2h_auton	29.9	positional variants	56	5.8	adp	2.6
1074.52	3	-0.5	Z20170518-38_filtered	48.932	1	IDEAESLNDE(1458.7732)ELEEK	831	snf2h	snf2h_hand	57.6	LLTQGFTNWNK(1743.7687)R	849	snf2h	snf2h_sant	49.3	positional variants	52.1	5.8	adp	1.2
1006.04	4	-0.8	Z20170518-37_filtered	83.29	1	VGAGAPVYLAAVLEYLTAE(1104.5597)ILELAGNAAR+Incorrect Mono 1Da	61	h2a	h2a_ap	47	LSK(2896.5698)M(Oxidation)GESSLR+Incorrect Mono 1Da	696	snf2h	snf2h_negc	6.7	unique	61.4	5.8	adp	3
846.204	4	0.1	Z20170518-38_filtered	72.684	1	GLNWLISLYENGINGILADE(690.4065)MGLGK+Incorrect Mono 1Da	208	snf2h	snf2h_reca1	32.7	K(2671.3680)TIGYK+Incorrect Mono 1Da	796	snf2h	snf2h_hand	-1.4	positional variants	62.1	5.7	adp	1.5
846.204	4	0.1	Z20170518-38_filtered	72.684	1	GLNWLISLYENGINGILAD(690.4065)EMGLGK+Incorrect Mono 1Da	207	snf2h	snf2h_reca1	32.7	K(2671.3680)TIGYK+Incorrect Mono 1Da	796	snf2h	snf2h_hand	-1.4	positional variants	62.1	5.7	adp	1.5
1047.51	4	0.3	Z20170518-38_filtered	61.134	1	GGPEGVAAQAVASAASAGPADAEME(912.5393)EIFDDASPGK+Incorrect Mono 1Da	61	snf2h	snf2h1	61.3	SK(3254.4674)LSEIVR+Incorrect Mono 1Da	321	snf2h	snf2h_reca1	0.8	positional variants	56.9	5.7	adp	2.5
1047.51	4	0.3	Z20170518-38_filtered	61.134	1	GGPEGVAAQAVASAASAGPADAEMEE(912.5393)IFDDASPGK+Incorrect Mono 1Da	62	snf2h	snf2h1	60.7	SK(3254.4674)LSEIVR+Incorrect Mono 1Da	321	snf2h	snf2h_reca1	0.8	positional variants	56.9	5.7	adp	2
1296.37	4	0.7	Z20170518-37_filtered	54.36	1	1835.8730-GSMSSAAEPPPPPPPESAPSKPAASIASGGSNSSNK	1	snf2h	snf2h1	80.3	TPEEVIE(3327.5677)YSAVFWER	884	snf2h	snf2h_sant	32.2	unique	52.2	5.7	adp	6.2
1074.52	3	-0.5	Z20170518-38_filtered	48.932	1	IDEAESLND(1458.7732)EELEEK	830	snf2h	snf2h_hand	56	LLTQGFTNWNK(1743.7687)R	849	snf2h	snf2h_sant	49.3	positional variants	50.4	5.6	adp	2.7
764.396	5	-0.5	Z20170518-38_filtered	62.614	1	DVLLPGEWDVC(Carbamidomethyl)VTSYEMLIKE(1192.6505)K+Incorrect Mono 1Da	295	snf2h	snf2h_reca1	9.2	SVFK(2605.2808)KFNWR+Incorrect Mono 1Da	300	snf2h	snf2h_reca1	-0.1	positional variants	71.6	5.5	adp	21.9
764.396	5	-0.5	Z20170518-38_filtered	62.614	1	DVLLPGEWDVC(Carbamidomethyl)VTSYEMLIKE(1192.6505)K+Incorrect Mono 1Da	295	snf2h	snf2h_reca1	9.2	SVFKK(2605.2808)FNWR+Incorrect Mono 1Da	301	snf2h	snf2h_reca1	-0.1	positional variants	71.6	5.5	adp	6.1
806.583	5	0.4	Z20170518-38_filtered	56.678	1	QK(2284.9219)IAFTEWIEPPKR+Incorrect Mono 1Da	726	snf2h	snf2h4	25.2	NFTMDTESSVYNFEGE(1723.9410)DYR+Incorrect Mono 1Da	719	snf2h	snf2h4	18.1	unique	62	5.5	adp	3.2
1270.1	4	-0.5	Z20170518-37_filtered	48.45	1	1714.7897-GSM(Oxidation)SSAAEPPPPPPPESAPSKPAASIASGGSNSSNK	1	snf2h	snf2h1	78.8	E(3343.5627)SEITDEDIDGILER	668	snf2h	snf2h_negc	31.6	positional variants	51.1	5.5	adp	13.2
1324.41	5	-0.9	Z20170518-37_filtered	56.886	1	3254.4674-GSM(Oxidation)SSAAEPPPPPPPESAPSKPAASIASGGSNSSNK+Incorrect Mono 1Da	1	snf2h	snf2h1	70.8	GGPEGVAAQAVASAASAGPADAEME(3343.5627)EIFDDASPGK+Incorrect Mono 1Da	61	snf2h	snf2h1	51.4	positional variants	54.2	5.5	adp	5.8
749.883	4	-1.7	Z20170518-38_filtered	53.055	1	TPEEVIE(1140.6192)YSAVFWER+Incorrect Mono 1Da	884	snf2h	snf2h_sant	32.5	YK(1835.8730)APFHQLR+Incorrect Mono 1Da	931	snf2h	snf2h_slide	21.2	unique	58.8	5.5	adp	4
901.65	4	-1.2	Z20170518-38_filtered	54.755	1	K(2284.9219)ANYAVDAYFR+Incorrect Mono 1Da	741	snf2h	snf2h_hand	21.6	NFTMDTESSVYNFE(1298.6408)GEDYR+Incorrect Mono 1Da	717	snf2h	snf2h4	17.6	unique	61.1	5.5	adp	5
1270.1	4	-0.5	Z20170518-37_filtered	48.45	1	1714.7897-GSM(Oxidation)SSAAEPPPPPPPESAPSKPAASIASGGSNSSNK	1	snf2h	snf2h1	78.8	ESE(3343.5627)ITDEDIDGILER	670	snf2h	snf2h_negc	31.1	positional variants	50.5	5.4	adp	7.7
1270.1	4	-0.5	Z20170518-37_filtered	48.45	1	1714.7897-GSM(Oxidation)SSAAEPPPPPPPESAPSKPAASIASGGSNSSNK	1	snf2h	snf2h1	78.8	ESEITD(3343.5627)EDIDGILER	673	snf2h	snf2h_negc	30.1	positional variants	49.6	5.4	adp	4.2
869.181	4	-1.3	Z20170518-38_filtered	54.299	1	Q(Gln->pyro-Glu)TELFAHFIQPAAQK(1036.4098)TPTSPLK+Incorrect Mono 1Da	114	snf2h	snf2h_auton	41.5	NYTEE(2417.2743)EDR+Incorrect Mono 1Da	952	snf2h	snf2h_slide	4.6	positional variants	55.1	5.4	adp	1.3
752.121	4	-0.3	Z20170518-39_filtered	60.361	1	K(1740.7964)ESYAIYVYK+Incorrect Mono 1Da	31	h2b	h2b_tail	12	AMSIMNSFVNDVFE(1244.6441)R+Incorrect Mono 1Da	68	h2b	h2b	7.3	unique	59.6	5.2	adp	8
1327.41	5	0.5	Z20170518-37_filtered	52.209	1	3270.4623-GSM(Oxidation)SSAAEPPPPPPPESAPSKPAASIASGGSNSSNK	1	snf2h	snf2h1	69	GGPEGVAAQAVASAASAGPADAEM(Oxidation)EE(3343.5627)IFDDASPGK	62	snf2h	snf2h1	47	positional variants	50.5	5.2	adp	5
1202.82	4	-1.5	Z20170518-37_filtered	53.004	1	GGPEGVAAQAVASAASAGPADAEM(Oxidation)EEIFDDASPGK(1261.6415)QK+Incorrect Mono 1Da	71	snf2h	snf2h1	45.7	NPE(3526.6158)LPNAAQAQK+Incorrect Mono 1Da	807	snf2h	snf2h_hand	8.7	unique	48.8	5.1	adp	4
925.491	4	1.7	Z20170518-38_filtered	54.455	1	Q(Gln->pyro-Glu)TELFAHFIQPAAQK(1261.6415)TPTSPLK+Incorrect Mono 1Da	114	snf2h	snf2h_auton	35.1	NPE(2417.2743)LPNAAQAQK+Incorrect Mono 1Da	807	snf2h	snf2h_hand	23.8	unique	56.2	5.1	adp	5
1190.32	4	-2.3	Z20170518-37_filtered	60.278	1	GGPEGVAAQAVASAASAGPADAE(1467.7874)M(Oxidation)EEIFDDASPGK+Incorrect Mono 1Da	59	snf2h	snf2h1	53.5	IAFTEWIEPPK(3270.4623)R+Incorrect Mono 1Da	737	snf2h	snf2h_hand	9.9	positional variants	46.4	5.1	adp	1.3
1190.32	4	-2.3	Z20170518-37_filtered	60.278	1	GGPEGVAAQAVASAASAGPADAEM(Oxidation)EE(1467.7874)IFDDASPGK+Incorrect Mono 1Da	62	snf2h	snf2h1	53.5	IAFTEWIEPPK(3270.4623)R+Incorrect Mono 1Da	737	snf2h	snf2h_hand	9.9	positional variants	46.4	5.1	adp	1.8
1190.32	4	-2.3	Z20170518-37_filtered	60.278	1	GGPEGVAAQAVASAASAGPADAEM(Oxidation)E(1467.7874)EIFDDASPGK+Incorrect Mono 1Da	61	snf2h	snf2h1	53.5	IAFTEWIEPPK(3270.4623)R+Incorrect Mono 1Da	737	snf2h	snf2h_hand	9.9	positional variants	46.4	5.1	adp	1.8
978.787	4	-2.2	Z20170518-38_filtered	65.895	1	VTIAQGGVLPNIQSVLLPK(1835.8730)K+Incorrect Mono 1Da	118	h2a	h2a_ctail	22.2	TPEEVIE(2056.2408)YSAVFWER+Incorrect Mono 1Da	884	snf2h	snf2h_sant	19.6	unique	53.4	5.1	adp	3
1278.34	4	0	Z20170518-37_filtered	42.811	1	1747.7636-GSM(Oxidation)SSAAEPPPPPPPESAPSKPAASIASGGSNSSNK	1	snf2h	snf2h1	69	TEQEEDE(3343.5627)ELLTESSK	154	snf2h	snf2h_auton	29.1	positional variants	47.5	5.1	adp	4.5
1133.51	5	0.5	Z20170518-37_filtered	46.916	1	2300.9168-GSM(Oxidation)SSAAEPPPPPPPESAPSKPAASIASGGSNSSNK	1	snf2h	snf2h1	65.6	NFTM(Oxidation)DTE(3343.5627)SSVYNFEGEDYR	710	snf2h	snf2h4	36.9	unique	52	5	adp	11.5
775.644	4	0.7	Z20170518-38_filtered	63.379	1	DVLLPGEWDVC(Carbamidomethyl)VTSYE(731.3867)MLIK+Incorrect Mono 1Da	290	snf2h	snf2h_reca1	18.4	K(2348.1432)FNWR+Incorrect Mono 1Da	301	snf2h	snf2h_reca1	1.4	unique	60.6	5	adp	4
772.412	4	-1.1	Z20170518-38_filtered	49.924	1	NPE(1804.9658)LPNAAQAQK+Incorrect Mono 1Da	807	snf2h	snf2h_hand	15.4	TLQTISLLGYMK(1261.6415)HYR+Incorrect Mono 1Da	225	snf2h	snf2h_reca1	6.5	unique	61.4	4.9	adp	6
1003.47	4	1.2	Z20170518-38_filtered	60.186	1	NFTMDTE(1706.9144)SSVYNFEGEDYR	710	snf2h	snf2h4	58.5	Q(Gln->pyro-Glu)K(2284.9219)IAFTEWIEPPKR	726	snf2h	snf2h4	47	unique	51.8	4.9	adp	2
817.743	3	0.1	Z20170518-39_filtered	41.141	1	EIAQDFK(1115.5247)TDLR	79	h3	h3	48.9	DAVTYTE(1316.6725)HAK	74	h4	h4	41.2	unique	47.5	4.9	adp	7
1278.34	4	0	Z20170518-37_filtered	42.811	1	1747.7636-GSM(Oxidation)SSAAEPPPPPPPESAPSKPAASIASGGSNSSNK	1	snf2h	snf2h1	69	TEQEED(3343.5627)EELLTESSK	153	snf2h	snf2h_auton	27.5	positional variants	45.8	4.9	adp	3.5
1050.28	4	-0.4	Z20170518-37_filtered	51.812	1	QTELFAHFIQPAAQK(1743.7687)TPTSPLK+Incorrect Mono 1Da	114	snf2h	snf2h_auton	24.8	IDEAE(2434.3009)SLNDEELEEK+Incorrect Mono 1Da	826	snf2h	snf2h_hand	23.4	positional variants	53.8	4.8	adp	1.5
747.084	4	-0.7	Z20170518-38_filtered	39.332	1	IDEAE(1221.5262)SLNDEELEEK+Incorrect Mono 1Da	826	snf2h	snf2h_hand	43.8	GK(1743.7687)NYTEEEDR+Incorrect Mono 1Da	947	snf2h	snf2h_slide	30.2	unique	51.3	4.8	adp	2.5
1202.81	4	-1	Z20170518-37_filtered	58.528	1	GGPEGVAAQAVASAASAGPADAE(1517.7474)M(Oxidation)EEIFDDASPGK+Incorrect Mono 1Da	59	snf2h	snf2h1	41.3	DEK(3270.4623)QNLLSVGDYR+Incorrect Mono 1Da	134	snf2h	snf2h_auton	12.1	positional variants	51.2	4.8	adp	2.6
1202.81	4	-1	Z20170518-37_filtered	58.528	1	GGPEGVAAQAVASAASAGPADAEM(Oxidation)E(1517.7474)EIFDDASPGK+Incorrect Mono 1Da	61	snf2h	snf2h1	41.3	DEK(3270.4623)QNLLSVGDYR+Incorrect Mono 1Da	134	snf2h	snf2h_auton	12.1	positional variants	51.2	4.8	adp	2.3
1202.81	4	-1	Z20170518-37_filtered	58.528	1	GGPEGVAAQAVASAASAGPADAEM(Oxidation)EE(1517.7474)IFDDASPGK+Incorrect Mono 1Da	62	snf2h	snf2h1	40.7	DEK(3270.4623)QNLLSVGDYR+Incorrect Mono 1Da	134	snf2h	snf2h_auton	12.1	positional variants	51.2	4.8	adp	2
915.707	4	-0.2	Z20170518-38_filtered	58.215	1	EVEGK(1261.6415)TPEEVIEYSAVFWER+Incorrect Mono 1Da	877	snf2h	snf2h_sant	38.8	NPE(2378.1430)LPNAAQAQK+Incorrect Mono 1Da	807	snf2h	snf2h_hand	22.5	unique	49.5	4.7	adp	3
800.101	4	0.2	Z20170518-38_filtered	45.684	1	NFTM(Oxidation)DTESSVYNFE(876.4454)GEDYR+Incorrect Mono 1Da	717	snf2h	snf2h4	17.7	EFK(2300.9168)TTNR+Incorrect Mono 1Da	330	snf2h	snf2h_reca1	6.5	unique	54.7	4.6	adp	1.5
1098.03	4	-0.7	Z20170518-37_filtered	44.927	1	1026.5346-GSM(Oxidation)SSAAEPPPPPPPESAPSKPAASIASGGSNSSNK	1	snf2h	snf2h1	77.5	D(3343.5627)IDILNSAGK	433	snf2h	snf2h_reca2	15.5	positional variants	42.2	4.6	adp	8
1098.03	4	-0.7	Z20170518-37_filtered	44.927	1	1026.5346-GSM(Oxidation)SSAAEPPPPPPPESAPSKPAASIASGGSNSSNK	1	snf2h	snf2h1	77.5	DID(3343.5627)ILNSAGK	435	snf2h	snf2h_reca2	15.5	positional variants	42.2	4.6	adp	2
860.774	3	1.3	Z20170518-39_filtered	42.937	1	NPE(1298.6408)LPNAAQAQK+Incorrect Mono 1Da	807	snf2h	snf2h_hand	27.1	K(1261.6415)ANYAVDAYFR+Incorrect Mono 1Da	741	snf2h	snf2h_hand	25.7	unique	53.1	4.6	adp	4
1252.64	5	1.3	Z20170518-37_filtered	82.143	1	VGAGAPVYLAAVLEYLTAE(3343.5627)ILELAGNAAR	61	h2a	h2a_ap	39.1	2896.5698-GSM(Oxidation)SSAAEPPPPPPPESAPSKPAASIASGGSNSSNK	1	snf2h	snf2h1	37.2	unique	40.9	4.5	adp	2.8
759.118	4	-0.6	Z20170518-38_filtered	54.425	1	ESEITD(1298.6408)EDIDGILER+Incorrect Mono 1Da	673	snf2h	snf2h_negc	29.5	K(1714.7897)ANYAVDAYFR+Incorrect Mono 1Da	741	snf2h	snf2h_hand	26.2	unique	50	4.5	adp	3
1038.78	4	0.3	Z20170518-37_filtered	61.768	1	ESEITDED(2417.2743)IDGILER+Incorrect Mono 1Da	675	snf2h	snf2h_negc	19.3	Q(Gln->pyro-Glu)TELFAHFIQPAAQK(1714.7897)TPTSPLK+Incorrect Mono 1Da	114	snf2h	snf2h_auton	16.9	unique	52	4.5	adp	1.3
1015.3	5	-0.1	Z20170518-37_filtered	45.634	1	1709.8889-GSM(Oxidation)SSAAEPPPPPPPESAPSKPAASIASGGSNSSNK	1	snf2h	snf2h1	64.9	QTE(3343.5627)LFAHFIQPAAQK	102	snf2h	snf2h_auton	22.8	unique	40.9	4.5	adp	8.5
860.688	4	0.1	Z20170518-38_filtered	55.589	1	Q(Gln->pyro-Glu)TELFAHFIQPAAQK(1002.4328)TPTSPLK+Incorrect Mono 1Da	114	snf2h	snf2h_auton	36.9	ENME(2417.2743)LEEK+Incorrect Mono 1Da	1016	snf2h	snf2h5	1.4	positional variants	49	4.5	adp	2.3
1156.81	4	0.1	Z20170518-37_filtered	40.511	1	1261.6415-GSM(Oxidation)SSAAEPPPPPPPESAPSKPAASIASGGSNSSNK	1	snf2h	snf2h1	62.6	NPE(3343.5627)LPNAAQAQK	807	snf2h	snf2h_hand	24.1	unique	47.9	4.5	adp	17
1069.87	3	0.3	Z20170518-38_filtered	66.984	1	AMSIMNSFVNDVFE(1447.7857)R	68	h2b	h2b	43.3	TVTAMDVVYALK(1740.7964)R	91	h4	h4	41.2	unique	42.8	4.5	adp	6.5
798.621	4	-0.1	Z20170518-38_filtered	46.493	1	FEDSPSYVK(1747.7636)WGK+Incorrect Mono 1Da	178	snf2h	snf2h2	18.1	TEQEEDEE(1423.6772)LLTESSK+Incorrect Mono 1Da	155	snf2h	snf2h_auton	16.8	positional variants	52.7	4.4	adp	1.6
1088.01	4	0	Z20170518-38_filtered	42.191	1	1002.4328-GSMSSAAEPPPPPPPESAPSKPAASIASGGSNSSNK	1	snf2h	snf2h1	66.3	E(3327.5677)NMELEEK	1013	snf2h	snf2h_slide	16.4	unique	40.3	4.4	adp	13.3
1148.04	4	-0.4	Z20170518-37_filtered	56.689	1	GGPEGVAAQAVASAASAGPADAE(1298.6408)M(Oxidation)EEIFDDASPGK+Incorrect Mono 1Da	59	snf2h	snf2h1	61.6	K(3270.4623)ANYAVDAYFR+Incorrect Mono 1Da	741	snf2h	snf2h_hand	5.5	unique	44.9	4.4	adp	2.3
726.857	4	-0.4	Z20170518-38_filtered	43.018	1	IDEAESLNDEE(1140.6192)LEEK+Incorrect Mono 1Da	832	snf2h	snf2h_hand	13.4	YK(1743.7687)APFHQLR+Incorrect Mono 1Da	931	snf2h	snf2h_slide	3.9	positional variants	57.3	4.4	adp	1.8
1032.49	4	-0.3	Z20170518-38_filtered	51.587	1	GGPEGVAAQAVASAASAGPADAE(836.4756)M(Oxidation)EEIFDDASPGK+Incorrect Mono 1Da	59	snf2h	snf2h1	47	VSEPK(3270.4623)APK+Incorrect Mono 1Da	760	snf2h	snf2h_hand	1.4	positional variants	48.2	4.4	adp	4.8
1032.49	4	-0.3	Z20170518-38_filtered	51.587	1	GGPEGVAAQAVASAASAGPADAEM(Oxidation)E(836.4756)EIFDDASPGK+Incorrect Mono 1Da	61	snf2h	snf2h1	47	VSEPK(3270.4623)APK+Incorrect Mono 1Da	760	snf2h	snf2h_hand	1.4	positional variants	48.2	4.4	adp	2.8
1131.8	4	0.6	Z20170518-37_filtered	43.832	1	1161.6030-GSM(Oxidation)SSAAEPPPPPPPESAPSKPAASIASGGSNSSNK	1	snf2h	snf2h1	67	ISGLIYE(3343.5627)ETR	52	h4	h4	9	unique	40.1	4.4	adp	9
1032.49	4	-0.3	Z20170518-38_filtered	51.587	1	GGPEGVAAQAVASAASAGPADAEM(Oxidation)EE(836.4756)IFDDASPGK+Incorrect Mono 1Da	62	snf2h	snf2h1	46.5	VSEPK(3270.4623)APK+Incorrect Mono 1Da	760	snf2h	snf2h_hand	1.4	positional variants	48.2	4.4	adp	2.6
1273.34	4	0.4	Z20170518-37_filtered	45.175	1	1743.7687-GSMSSAAEPPPPPPPESAPSKPAASIASGGSNSSNK	1	snf2h	snf2h1	75.5	IDEAESLNDE(3327.5677)ELEEK	831	snf2h	snf2h_hand	29.1	positional variants	40	4.4	adp	2.6
1300.37	4	-0.4	Z20170518-37_filtered	52.951	1	1835.8730-GSM(Oxidation)SSAAEPPPPPPPESAPSKPAASIASGGSNSSNK	1	snf2h	snf2h1	68.4	TPE(3343.5627)EVIEYSAVFWER	880	snf2h	snf2h_sant	28.3	positional variants	44.3	4.4	adp	7.2
1300.37	4	-0.4	Z20170518-37_filtered	52.951	1	1835.8730-GSM(Oxidation)SSAAEPPPPPPPESAPSKPAASIASGGSNSSNK	1	snf2h	snf2h1	68.4	TPEE(3343.5627)VIEYSAVFWER	881	snf2h	snf2h_sant	28.3	positional variants	44.3	4.4	adp	3.2
1051.28	4	1	Z20170518-37_filtered	51.452	1	QTELFAHFIQPAAQK(1747.7636)TPTSPLK+Incorrect Mono 1Da	114	snf2h	snf2h_auton	31.8	TEQEE(2434.3009)DEELLTESSK+Incorrect Mono 1Da	152	snf2h	snf2h_auton	25.9	positional variants	47.2	4.3	adp	3.1
1277.34	4	0.2	Z20170518-37_filtered	43.567	1	1743.7687-GSM(Oxidation)SSAAEPPPPPPPESAPSKPAASIASGGSNSSNK	1	snf2h	snf2h1	61.6	IDEAESLND(3343.5627)EELEEK	830	snf2h	snf2h_hand	29	positional variants	42.6	4.3	adp	1.6
1050.9	5	-0.4	Z20170518-37_filtered	42.842	1	1903.8647-GSMSSAAEPPPPPPPESAPSKPAASIASGGSNSSNK	1	snf2h	snf2h1	67	RTEQEE(3327.5677)DEELLTESSK	152	snf2h	snf2h_auton	23.3	positional variants	39.2	4.3	adp	4
1243.57	4	1	Z20170518-37_filtered	61.74	1	GGPEGVAAQAVASAASAGPADAEMEEIFDD(1697.7784)ASPGK	66	snf2h	snf2h1	101.8	Q(Gln->pyro-Glu)K(3254.4674)EIQEPDPTYEEK	73	snf2h	snf2h1	28.8	positional variants	32.5	4.3	adp	9.9
1243.57	4	1	Z20170518-37_filtered	61.74	1	GGPEGVAAQAVASAASAGPADAEMEE(1697.7784)IFDDASPGK	62	snf2h	snf2h1	101.8	Q(Gln->pyro-Glu)K(3254.4674)EIQEPDPTYEEK	73	snf2h	snf2h1	28.8	positional variants	32.5	4.3	adp	7.1
566.29	5	0.3	Z20170518-38_filtered	51.408	1	TLQTISLLGYMK(1002.4328)HYR+Incorrect Mono 1Da	225	snf2h	snf2h_reca1	15.6	E(1804.9658)NMELEEK+Incorrect Mono 1Da	1013	snf2h	snf2h_slide	11.2	unique	51.3	4.3	adp	2.3
1277.34	4	0.2	Z20170518-37_filtered	43.567	1	1743.7687-GSM(Oxidation)SSAAEPPPPPPPESAPSKPAASIASGGSNSSNK	1	snf2h	snf2h1	61.6	IDEAE(3343.5627)SLNDEELEEK	826	snf2h	snf2h_hand	31.8	positional variants	43.9	4.3	adp	3.9
1073.01	4	0.3	Z20170518-37_filtered	41.453	1	926.4458-GSM(Oxidation)SSAAEPPPPPPPESAPSKPAASIASGGSNSSNK	1	snf2h	snf2h1	73.3	D(3343.5627)DIENIAR	865	snf2h	snf2h_sant	13.2	unique	39.4	4.3	adp	7
798.621	4	-0.1	Z20170518-38_filtered	46.493	1	FEDSPSYVK(1747.7636)WGK+Incorrect Mono 1Da	178	snf2h	snf2h2	18.1	TEQEEDE(1423.6772)ELLTESSK+Incorrect Mono 1Da	154	snf2h	snf2h_auton	16.8	positional variants	51.1	4.3	adp	1.6
766.898	6	1.7	Z20170518-37_filtered	67.287	1	FQSSAVM(Oxidation)ALQEASEAYLVALFE(1140.6192)DTNLAAIHAK+Incorrect Mono 1Da	105	h3	h3	42.3	YK(3435.7021)APFHQLR+Incorrect Mono 1Da	931	snf2h	snf2h_slide	6	unique	45.7	4.3	adp	2.5
1206.06	4	0.3	Z20170518-37_filtered	41.007	1	1458.6515-GSM(Oxidation)SSAAEPPPPPPPESAPSKPAASIASGGSNSSNK	1	snf2h	snf2h1	78.2	EIQE(3343.5627)PDPTYEEK	77	snf2h	snf2h1	25.5	unique	40.3	4.2	adp	7.8
1016.69	5	-3.1	Z20170518-37_filtered	63.661	1	GGPEGVAAQAVASAASAGPAD(1804.9658)AEMEEIFDDASPGK+Incorrect Mono 1Da	57	snf2h	snf2h1	50.1	TLQTISLLGYMK(3254.4674)HYR+Incorrect Mono 1Da	225	snf2h	snf2h_reca1	9.9	positional variants	43.9	4.2	adp	3.1
1016.69	5	-3.1	Z20170518-37_filtered	63.661	1	GGPEGVAAQAVASAASAGPADAE(1804.9658)MEEIFDDASPGK+Incorrect Mono 1Da	59	snf2h	snf2h1	50.1	TLQTISLLGYMK(3254.4674)HYR+Incorrect Mono 1Da	225	snf2h	snf2h_reca1	9.9	positional variants	43.9	4.2	adp	3
1416.63	4	0.8	Z20170518-37_filtered	46.764	1	2300.9168-GSM(Oxidation)SSAAEPPPPPPPESAPSKPAASIASGGSNSSNK	1	snf2h	snf2h1	53.8	NFTM(Oxidation)D(3343.5627)TESSVYNFEGEDYR	708	snf2h	snf2h4	33.1	positional variants	43.9	4.2	adp	8.3
1144.79	4	-1.2	Z20170518-37_filtered	54.822	1	GGPEGVAAQAVASAASAGPADAE(1285.6449)M(Oxidation)EEIFDDASPGK+Incorrect Mono 1Da	59	snf2h	snf2h1	51.8	SVC(Carbamidomethyl)LIGDK(3270.4623)EQR+Incorrect Mono 1Da	266	snf2h	snf2h_reca1	0.9	positional variants	44.4	4.2	adp	2.2
1270.1	4	0	Z20170518-37_filtered	48.962	1	1714.7897-GSM(Oxidation)SSAAEPPPPPPPESAPSKPAASIASGGSNSSNK	1	snf2h	snf2h1	64.2	ESEITDE(3343.5627)DIDGILER	674	snf2h	snf2h_negc	24.2	positional variants	40.2	4.2	adp	3
1051.23	4	-0.1	Z20170518-38_filtered	58.658	1	GGPEGVAAQAVASAASAGPADAE(927.4232)MEEIFDDASPGK+Incorrect Mono 1Da	59	snf2h	snf2h1	41.5	K(3254.4674)MDGAPDGR+Incorrect Mono 1Da	1038	snf2h	snf2h5	4.5	positional variants	43.5	4.2	adp	1.7
1144.79	4	-1.2	Z20170518-37_filtered	54.822	1	GGPEGVAAQAVASAASAGPADAEM(Oxidation)E(1285.6449)EIFDDASPGK+Incorrect Mono 1Da	61	snf2h	snf2h1	51.8	SVC(Carbamidomethyl)LIGDK(3270.4623)EQR+Incorrect Mono 1Da	266	snf2h	snf2h_reca1	0.9	positional variants	44.4	4.2	adp	1.2
1096.02	4	0.3	Z20170518-37_filtered	43.025	1	1018.4720-GSM(Oxidation)SSAAEPPPPPPPESAPSKPAASIASGGSNSSNK	1	snf2h	snf2h1	53.6	E(3343.5627)NVYDELR	969	snf2h	snf2h_slide	13.2	unique	41.5	4.2	adp	12.5
1144.79	4	-1.2	Z20170518-37_filtered	54.822	1	GGPEGVAAQAVASAASAGPADAEM(Oxidation)EE(1285.6449)IFDDASPGK+Incorrect Mono 1Da	62	snf2h	snf2h1	51.2	SVC(Carbamidomethyl)LIGDK(3270.4623)EQR+Incorrect Mono 1Da	266	snf2h	snf2h_reca1	0.9	positional variants	44.4	4.2	adp	1.2
774.371	4	-0.5	Z20170518-38_filtered	46.964	1	IDEAESLND(1330.6737)EELEEK+Incorrect Mono 1Da	830	snf2h	snf2h_hand	24.5	IGK(1743.7687)DEM(Oxidation)LQMIR+Incorrect Mono 1Da	649	snf2h	snf2h_negc	16.4	positional variants	50.2	4.2	adp	2
1243.83	4	-0.8	Z20170518-37_filtered	51.068	1	1609.7269-GSM(Oxidation)SSAAEPPPPPPPESAPSKPAASIASGGSNSSNK	1	snf2h	snf2h1	63.7	VLDILED(3343.5627)YC(Carbamidomethyl)M(Oxidation)WR	519	snf2h	snf2h_reca2	17	positional variants	38.9	4.2	adp	4
1051.23	4	-0.1	Z20170518-38_filtered	58.658	1	GGPEGVAAQAVASAASAGPADAEMEE(927.4232)IFDDASPGK+Incorrect Mono 1Da	62	snf2h	snf2h1	38.5	K(3254.4674)MDGAPDGR+Incorrect Mono 1Da	1038	snf2h	snf2h5	4.5	positional variants	43.5	4.2	adp	1.2
1133.51	5	0.7	Z20170518-37_filtered	47.458	1	2300.9168-GSM(Oxidation)SSAAEPPPPPPPESAPSKPAASIASGGSNSSNK	1	snf2h	snf2h1	68.8	NFTM(Oxidation)DTESSVYNFE(3343.5627)GEDYR	717	snf2h	snf2h4	27.3	positional variants	39.4	4.2	adp	7.9
791.876	4	-1	Z20170518-38_filtered	50.457	1	IDEAE(1400.6970)SLNDEELEEK+Incorrect Mono 1Da	826	snf2h	snf2h_hand	32.5	DIDILNSAGK(1743.7687)MDK+Incorrect Mono 1Da	442	snf2h	snf2h_reca2	14	unique	48.3	4.2	adp	2
722.939	4	-0.5	Z20170518-39_filtered	58.512	1	VTIAQGGVLPNIQSVLLPK(812.4756)K+Incorrect Mono 1Da	118	h2a	h2a_ctail	16.4	STE(2056.2408)LLIR+Incorrect Mono 1Da	59	h3	h3	-2.9	unique	49.8	4.2	adp	3
1015.24	4	-0.5	Z20170518-38_filtered	56.685	1	GGPEGVAAQAVASAASAGPADAE(783.4491)MEEIFDDASPGK+Incorrect Mono 1Da	59	snf2h	snf2h1	54.7	IK(3254.4674)ADVEK+Incorrect Mono 1Da	399	snf2h	snf2h_reca1	0.8	unique	44.4	4.2	adp	2.7
1051.28	4	1	Z20170518-37_filtered	51.452	1	QTELFAHFIQPAAQK(1747.7636)TPTSPLK+Incorrect Mono 1Da	114	snf2h	snf2h_auton	31.8	TEQE(2434.3009)EDEELLTESSK+Incorrect Mono 1Da	151	snf2h	snf2h_auton	21.2	positional variants	45.7	4.1	adp	4.1
1046.77	4	1.3	Z20170518-38_filtered	57.101	1	Q(Gln->pyro-Glu)TELFAHFIQPAAQK(1747.7636)TPTSPLK	114	snf2h	snf2h_auton	75.2	TEQEEDEE(2417.2743)LLTESSK	155	snf2h	snf2h_auton	37.6	positional variants	36.6	4.1	adp	2.7
1202.06	4	-0.9	Z20170518-38_filtered	43.089	1	1458.6515-GSMSSAAEPPPPPPPESAPSKPAASIASGGSNSSNK	1	snf2h	snf2h1	70	E(3327.5677)IQEPDPTYEEK	74	snf2h	snf2h1	26.7	unique	41.3	4.1	adp	25.7
1270.1	4	0	Z20170518-37_filtered	48.962	1	1714.7897-GSM(Oxidation)SSAAEPPPPPPPESAPSKPAASIASGGSNSSNK	1	snf2h	snf2h1	64.2	ESEITDED(3343.5627)IDGILER	675	snf2h	snf2h_negc	22.7	positional variants	38.7	4.1	adp	1.8
613.569	4	-0.8	Z20170518-39_filtered	37.177	1	NPELPNAAQAQK(542.2700)EEQLK+Incorrect Mono 1Da	816	snf2h	snf2h_hand	31.3	E(1888.9643)VEGK+Incorrect Mono 1Da	873	snf2h	snf2h_sant	0.2	positional variants	46.4	4.1	adp	2.5
914.149	3	-1.1	Z20170518-39_filtered	44.58	1	NPE(1458.7732)LPNAAQAQK+Incorrect Mono 1Da	807	snf2h	snf2h_hand	22.7	LLTQGFTNWNK(1261.6415)R+Incorrect Mono 1Da	849	snf2h	snf2h_sant	8.1	unique	47.1	4.1	adp	3.5
855.434	4	-1.9	Z20170518-38_filtered	62.552	1	TLQTISLLGYMK(1593.7320)HYR+Incorrect Mono 1Da	225	snf2h	snf2h_reca1	11.9	VLDILE(1804.9658)DYC(Carbamidomethyl)MWR+Incorrect Mono 1Da	518	snf2h	snf2h_reca2	8.7	unique	53.1	4.1	adp	8.5
1159.57	5	-1.5	Z20170518-37_filtered	65.25	1	GGPEGVAAQAVASAASAGPADAE(2503.3264)M(Oxidation)EEIFDDASPGK+Incorrect Mono 1Da	59	snf2h	snf2h1	48.9	FEYLLK(3270.4623)QTELFAHFIQPAAQK+Incorrect Mono 1Da	99	snf2h	snf2h_auton	15.2	positional variants	41.2	4.1	adp	1.7
1133.51	5	0.7	Z20170518-37_filtered	47.458	1	2300.9168-GSM(Oxidation)SSAAEPPPPPPPESAPSKPAASIASGGSNSSNK	1	snf2h	snf2h1	68.8	NFTM(Oxidation)DTESSVYNFEGE(3343.5627)DYR	719	snf2h	snf2h4	25.8	positional variants	37.9	4.1	adp	2.5
1019.08	5	0.3	Z20170518-38_filtered	44.959	1	1743.7687-GSMSSAAEPPPPPPPESAPSKPAASIASGGSNSSNK+Incorrect Mono 1Da	1	snf2h	snf2h1	95.7	IDE(3327.5677)AESLNDEELEEK+Incorrect Mono 1Da	824	snf2h	snf2h_hand	34.5	positional variants	37.2	4	adp	3.9
1312.11	4	0.4	Z20170518-37_filtered	63.887	1	GGPEGVAAQAVASAASAGPADAEMEEIFDDASPGK(1714.7897)QK+Incorrect Mono 1Da	71	snf2h	snf2h1	34.7	E(3510.6209)SEITDEDIDGILER+Incorrect Mono 1Da	668	snf2h	snf2h_negc	11.8	positional variants	43.4	4	adp	1.5
1312.11	4	0.4	Z20170518-37_filtered	63.887	1	GGPEGVAAQAVASAASAGPADAEMEEIFDDASPGK(1714.7897)QK+Incorrect Mono 1Da	71	snf2h	snf2h1	34.7	ESE(3510.6209)ITDEDIDGILER+Incorrect Mono 1Da	670	snf2h	snf2h_negc	11.8	positional variants	43.4	4	adp	1.5
1021.52	3	0.5	Z20170518-39_filtered	59.499	1	Q(Gln->pyro-Glu)PNVQD(1458.7732)FQFFPPR+Incorrect Mono 1Da	775	snf2h	snf2h_hand	21.1	LLTQGFTNWNK(1583.7521)R+Incorrect Mono 1Da	849	snf2h	snf2h_sant	7.1	unique	44.9	4	adp	11
1043.04	4	4.4	Z20170518-37_filtered	56.564	1	QTELFAHFIQPAAQK(1714.7897)TPTSPLK+Incorrect Mono 1Da	114	snf2h	snf2h_auton	28	E(2434.3009)SEITDEDIDGILER+Incorrect Mono 1Da	668	snf2h	snf2h_negc	24.4	positional variants	44.4	4	adp	1.5
1043.04	4	4.4	Z20170518-37_filtered	56.564	1	QTELFAHFIQPAAQK(1714.7897)TPTSPLK+Incorrect Mono 1Da	114	snf2h	snf2h_auton	28	ESE(2434.3009)ITDEDIDGILER+Incorrect Mono 1Da	670	snf2h	snf2h_negc	24.4	positional variants	44.4	4	adp	1.5
629.314	4	1.8	Z20170518-38_filtered	37.219	1	IDE(750.4388)AESLNDEELEEK+Incorrect Mono 1Da	824	snf2h	snf2h_hand	35.5	1743.7687-AKSAPAPK+Incorrect Mono 1Da	1	h2b	h2b_tail	11.3	positional variants	41.3	4	adp	1.3
629.314	4	1.8	Z20170518-38_filtered	37.219	1	IDE(750.4388)AESLNDEELEEK+Incorrect Mono 1Da	824	snf2h	snf2h_hand	35.5	AK(1743.7687)SAPAPK+Incorrect Mono 1Da	2	h2b	h2b_tail	11.3	positional variants	41.3	4	adp	1.3
1243.83	4	-0.8	Z20170518-37_filtered	51.068	1	1609.7269-GSM(Oxidation)SSAAEPPPPPPPESAPSKPAASIASGGSNSSNK	1	snf2h	snf2h1	63.7	VLDILE(3343.5627)DYC(Carbamidomethyl)M(Oxidation)WR	518	snf2h	snf2h_reca2	15.4	positional variants	37.3	4	adp	13.5
936.971	4	1.2	Z20170518-38_filtered	55.216	1	NPELPNAAQAQK(1835.8730)EEQLK+Incorrect Mono 1Da	816	snf2h	snf2h_hand	35.9	TPEEVIE(1888.9643)YSAVFWER+Incorrect Mono 1Da	884	snf2h	snf2h_sant	29.9	unique	44.4	4	adp	1.3
767.11	4	-1.1	Z20170518-39_filtered	47.339	1	K(1747.7636)ANYAVDAYFR	741	snf2h	snf2h_hand	42	TEQEED(1298.6408)EELLTESSK	153	snf2h	snf2h_auton	35.6	positional variants	41.9	4	adp	1.5
767.11	4	-1.1	Z20170518-39_filtered	47.339	1	K(1747.7636)ANYAVDAYFR	741	snf2h	snf2h_hand	42	TEQEEDE(1298.6408)ELLTESSK	154	snf2h	snf2h_auton	35	positional variants	41.9	4	adp	1.8
691.584	4	0	Z20170518-39_filtered	41.623	1	E(1285.6449)IQEPDPTYEEK	74	snf2h	snf2h1	39.2	SVC(Carbamidomethyl)LIGDK(1458.6515)EQR	266	snf2h	snf2h_reca1	37.1	unique	43.1	4	adp	4
862.722	6	1.1	Z20170518-37_filtered	47.727	1	K(1747.7636)C(Carbamidomethyl)C(Carbamidomethyl)NHPYLFDGAEPGPPYTTDM(Oxidation)HLVTNSGK+Incorrect Mono 1Da	457	snf2h	snf2h_reca2	70	TE(3403.5060)QEEDEELLTESSK+Incorrect Mono 1Da	149	snf2h	snf2h_auton	33.7	unique	41.7	4	adp	5.8
679.855	4	-0.8	Z20170518-38_filtered	62.406	1	LFELLEK(1002.4328)EILFYR+Incorrect Mono 1Da	789	snf2h	snf2h_hand	22.1	E(1693.9443)NMELEEK+Incorrect Mono 1Da	1013	snf2h	snf2h_slide	17.4	unique	48.6	4	adp	1.3
1100.5	4	-0.8	Z20170518-38_filtered	38.31	1	1036.4098-GSM(Oxidation)SSAAEPPPPPPPESAPSKPAASIASGGSNSSNK	1	snf2h	snf2h1	63.2	NYTE(3343.5627)EEDR	951	snf2h	snf2h_slide	6.1	unique	37.5	4	adp	7.4
1133.89	6	0.2	Z20170518-37_filtered	67.838	1	3435.7021-GSM(Oxidation)SSAAEPPPPPPPESAPSKPAASIASGGSNSSNK	1	snf2h	snf2h1	65.7	FQSSAVM(Oxidation)ALQEASEAYLVALFE(3343.5627)DTNLAAIHAK	105	h3	h3	34.6	unique	43.5	4	adp	4.4
1145.76	5	0.1	Z20170518-37_filtered	57.964	1	GGPEGVAAQAVASAASAGPAD(2434.3009)AEM(Oxidation)EEIFDDASPGK+Incorrect Mono 1Da	57	snf2h	snf2h1	75.9	QTELFAHFIQPAAQK(3270.4623)TPTSPLK+Incorrect Mono 1Da	114	snf2h	snf2h_auton	19.9	positional variants	35	4	adp	4
1159.57	5	-1.5	Z20170518-37_filtered	65.25	1	GGPEGVAAQAVASAASAGPADAEM(Oxidation)E(2503.3264)EIFDDASPGK+Incorrect Mono 1Da	61	snf2h	snf2h1	48.9	FEYLLK(3270.4623)QTELFAHFIQPAAQK+Incorrect Mono 1Da	99	snf2h	snf2h_auton	15.2	positional variants	40.6	4	adp	1.2
1159.57	5	-1.5	Z20170518-37_filtered	65.25	1	GGPEGVAAQAVASAASAGPADAEM(Oxidation)EE(2503.3264)IFDDASPGK+Incorrect Mono 1Da	62	snf2h	snf2h1	48.9	FEYLLK(3270.4623)QTELFAHFIQPAAQK+Incorrect Mono 1Da	99	snf2h	snf2h_auton	15.2	positional variants	40.6	4	adp	1.2
766.112	4	0	Z20170518-39_filtered	47.581	1	IDE(1298.6408)AESLNDEELEEK	824	snf2h	snf2h_hand	45.6	K(1743.7687)ANYAVDAYFR	741	snf2h	snf2h_hand	42	unique	41.8	3.9	adp	3
614.304	4	-0.4	Z20170518-39_filtered	41.64	1	IDEAESLNDEELEE(690.4065)K+Incorrect Mono 1Da	835	snf2h	snf2h_hand	13.7	K(1743.7687)TIGYK+Incorrect Mono 1Da	796	snf2h	snf2h_hand	8.3	positional variants	45.9	3.9	adp	1.8
1054.1	5	0.5	Z20170518-37_filtered	41.745	1	1903.8647-GSM(Oxidation)SSAAEPPPPPPPESAPSKPAASIASGGSNSSNK	1	snf2h	snf2h1	66.1	RTEQE(3343.5627)EDEELLTESSK	151	snf2h	snf2h_auton	22.9	positional variants	35.2	3.9	adp	3.3
868.429	4	-2.9	Z20170518-38_filtered	55.655	1	Q(Gln->pyro-Glu)K(1743.7687)IAFTEWIEPPKR+Incorrect Mono 1Da	726	snf2h	snf2h4	37.8	IDEAE(1706.9144)SLNDEELEEK+Incorrect Mono 1Da	826	snf2h	snf2h_hand	32	unique	45.8	3.9	adp	1.8
655.959	5	0.1	Z20170518-38_filtered	54.304	1	QTELFAHFIQPAAQK(821.4436)TPTSPLK+Incorrect Mono 1Da	114	snf2h	snf2h_auton	29.6	E(2434.3009)ILFYR+Incorrect Mono 1Da	790	snf2h	snf2h_hand	8.6	unique	41	3.9	adp	5
801.77	3	-0.2	Z20170518-39_filtered	43.611	1	LLTQGFTNWNK(924.5029)R+Incorrect Mono 1Da	849	snf2h	snf2h_sant	8.2	LVD(1458.7732)QNLNK+Incorrect Mono 1Da	641	snf2h	snf2h_reca2	6.1	unique	46.2	3.9	adp	3
914.428	5	0.4	Z20170518-37_filtered	54.367	1	APRPPK(2300.9168)QPNVQDFQFFPPR+Incorrect Mono 1Da	769	snf2h	snf2h_hand	28.6	NFTM(Oxidation)DTESSVYNFE(2247.1701)GEDYR+Incorrect Mono 1Da	717	snf2h	snf2h4	24	unique	45.9	3.9	adp	6.7
1104.52	4	0.7	Z20170518-37_filtered	40.778	1	1052.4815-GSM(Oxidation)SSAAEPPPPPPPESAPSKPAASIASGGSNSSNK	1	snf2h	snf2h1	71.2	FED(3343.5627)SPSYVK	172	snf2h	snf2h2	10.7	positional variants	35.2	3.9	adp	2.5
1104.52	4	0.7	Z20170518-37_filtered	40.778	1	1052.4815-GSM(Oxidation)SSAAEPPPPPPPESAPSKPAASIASGGSNSSNK	1	snf2h	snf2h1	71.2	FE(3343.5627)DSPSYVK	171	snf2h	snf2h2	10.7	positional variants	35.2	3.9	adp	4.5
794.614	4	-1	Z20170518-38_filtered	48.886	1	NFTM(Oxidation)DTESSVYNFEGE(854.4974)DYR+Incorrect Mono 1Da	719	snf2h	snf2h4	26.4	ALDTK(2300.9168)IGR+Incorrect Mono 1Da	926	snf2h	snf2h_slide	-0.1	unique	48.1	3.9	adp	3
1142.54	4	0	Z20170518-37_filtered	41.421	1	1204.5724-GSM(Oxidation)SSAAEPPPPPPPESAPSKPAASIASGGSNSSNK	1	snf2h	snf2h1	61.3	FITD(3343.5627)NTVEER	612	snf2h	snf2h_reca2	15.8	unique	38	3.9	adp	8.7
749.394	4	0.4	Z20170518-38_filtered	52.877	1	Q(Gln->pyro-Glu)TELFAHFIQPAAQK(557.2558)TPTSPLK+Incorrect Mono 1Da	114	snf2h	snf2h_auton	31.4	E(2417.2743)QGSR+Incorrect Mono 1Da	499	snf2h	snf2h_reca2	-2.3	unique	54.6	3.9	adp	6
1019.08	5	0.3	Z20170518-38_filtered	44.959	1	1743.7687-GSMSSAAEPPPPPPPESAPSKPAASIASGGSNSSNK+Incorrect Mono 1Da	1	snf2h	snf2h1	95.7	ID(3327.5677)EAESLNDEELEEK+Incorrect Mono 1Da	823	snf2h	snf2h_hand	32.9	positional variants	35.6	3.9	adp	3.2
1123.78	4	0.2	Z20170518-37_filtered	41.174	1	1129.5074-GSM(Oxidation)SSAAEPPPPPPPESAPSKPAASIASGGSNSSNK	1	snf2h	snf2h1	61.6	C(Carbamidomethyl)NE(3343.5627)LQDIEK	895	snf2h	snf2h_slide	13.3	unique	39.5	3.9	adp	8.5
1360.46	5	1.3	Z20170518-37_filtered	67.878	1	3435.7021-GSM(Oxidation)SSAAEPPPPPPPESAPSKPAASIASGGSNSSNK	1	snf2h	snf2h1	39.3	FQSSAVM(Oxidation)ALQEASE(3343.5627)AYLVALFEDTNLAAIHAK	97	h3	h3	35.8	positional variants	43.7	3.8	adp	2.9
1145.76	5	0.1	Z20170518-37_filtered	57.964	1	GGPEGVAAQAVASAASAGPADAE(2434.3009)M(Oxidation)EEIFDDASPGK+Incorrect Mono 1Da	59	snf2h	snf2h1	74.4	QTELFAHFIQPAAQK(3270.4623)TPTSPLK+Incorrect Mono 1Da	114	snf2h	snf2h_auton	19.9	positional variants	33.5	3.8	adp	5
1059.53	4	0.6	Z20170518-37_filtered	46.17	1	872.5008-GSM(Oxidation)SSAAEPPPPPPPESAPSKPAASIASGGSNSSNK	1	snf2h	snf2h1	82.7	LFE(3343.5627)LLEK	785	snf2h	snf2h_hand	5.5	unique	33.8	3.8	adp	8
744.407	4	1.4	Z20170518-38_filtered	60.673	1	LFELLEK(1261.6415)EILFYR	789	snf2h	snf2h_hand	43.3	NPE(1693.9443)LPNAAQAQK	807	snf2h	snf2h_hand	33.8	unique	42.3	3.8	adp	5.4
1051.51	4	-0.9	Z20170518-37_filtered	56.938	1	GGPEGVAAQAVASAASAGPADAE(912.5393)M(Oxidation)EEIFDDASPGK+Incorrect Mono 1Da	59	snf2h	snf2h1	47	SK(3270.4623)LSEIVR+Incorrect Mono 1Da	321	snf2h	snf2h_reca1	-2.3	positional variants	52.2	3.8	adp	2
619.818	4	0.3	Z20170518-38_filtered	42.57	1	ESE(741.4385)ITDEDIDGILER+Incorrect Mono 1Da	670	snf2h	snf2h_negc	34.5	IK(1714.7897)KDEK+Incorrect Mono 1Da	130	snf2h	snf2h_auton	6.5	unique	39.1	3.8	adp	1.7
1035.49	4	0.2	Z20170518-37_filtered	38.089	1	776.3487-GSM(Oxidation)SSAAEPPPPPPPESAPSKPAASIASGGSNSSNK	1	snf2h	snf2h1	64.8	M(Oxidation)GE(3343.5627)SSLR	699	snf2h	snf2h_negc	3.9	unique	34.7	3.8	adp	16
767.11	4	-1.1	Z20170518-39_filtered	47.339	1	K(1747.7636)ANYAVDAYFR	741	snf2h	snf2h_hand	42	TEQEE(1298.6408)DEELLTESSK	152	snf2h	snf2h_auton	34	positional variants	40.3	3.8	adp	1.8
1044.52	4	1	Z20170518-37_filtered	42.716	1	812.4756-GSM(Oxidation)SSAAEPPPPPPPESAPSKPAASIASGGSNSSNK	1	snf2h	snf2h1	68.8	STE(3343.5627)LLIR	59	h3	h3	3.9	unique	34.1	3.8	adp	5
842.688	4	-0.5	Z20170518-38_filtered	62.357	1	TPEEVIE(1511.8381)YSAVFWER+Incorrect Mono 1Da	884	snf2h	snf2h_sant	26.4	ILMK(1835.8730)DIDILNSAGK+Incorrect Mono 1Da	432	snf2h	snf2h_reca2	26.3	unique	46.6	3.8	adp	2
1360.46	5	1.3	Z20170518-37_filtered	67.878	1	3435.7021-GSM(Oxidation)SSAAEPPPPPPPESAPSKPAASIASGGSNSSNK	1	snf2h	snf2h1	39.3	FQSSAVM(Oxidation)ALQE(3343.5627)ASEAYLVALFEDTNLAAIHAK	94	h3	h3	35.1	positional variants	43.1	3.7	adp	2.4
707.582	5	1.7	Z20170518-37_filtered	55.351	1	TLQTISLLGYMK(1709.8889)HYR	225	snf2h	snf2h_reca1	45.9	QTE(1804.9658)LFAHFIQPAAQK	102	snf2h	snf2h_auton	33.9	unique	40.2	3.7	adp	3
786.11	4	-0.2	Z20170518-38_filtered	46.425	1	NFTMDTESSVYNFE(836.4756)GEDYR+Incorrect Mono 1Da	717	snf2h	snf2h4	17.1	VSEPK(2284.9219)APK+Incorrect Mono 1Da	760	snf2h	snf2h_hand	1.4	unique	46	3.7	adp	2
1247.57	4	2.9	Z20170518-37_filtered	56.89	1	GGPEGVAAQAVASAASAGPADAEM(Oxidation)EEIFD(1697.7784)DASPGK	65	snf2h	snf2h1	48.5	Q(Gln->pyro-Glu)K(3270.4623)EIQEPDPTYEEK	73	snf2h	snf2h1	27.9	positional variants	33.5	3.7	adp	5.9
1247.57	4	2.9	Z20170518-37_filtered	56.89	1	GGPEGVAAQAVASAASAGPADAEM(Oxidation)E(1697.7784)EIFDDASPGK	61	snf2h	snf2h1	48.5	Q(Gln->pyro-Glu)K(3270.4623)EIQEPDPTYEEK	73	snf2h	snf2h1	27.9	positional variants	33.5	3.7	adp	7.6
707.136	5	-1.3	Z20170518-38_filtered	46.429	1	IDEAESLNDE(1767.8652)ELEEK+Incorrect Mono 1Da	831	snf2h	snf2h_hand	34.8	ANEK(1743.7687)WGRDDIENIAR+Incorrect Mono 1Da	861	snf2h	snf2h_sant	17.4	positional variants	43.2	3.7	adp	1.9
1247.57	4	2.9	Z20170518-37_filtered	56.89	1	GGPEGVAAQAVASAASAGPAD(1697.7784)AEM(Oxidation)EEIFDDASPGK	57	snf2h	snf2h1	48.5	Q(Gln->pyro-Glu)K(3270.4623)EIQEPDPTYEEK	73	snf2h	snf2h1	27.9	positional variants	33.5	3.7	adp	3.6
1247.57	4	2.9	Z20170518-37_filtered	56.89	1	GGPEGVAAQAVASAASAGPADAE(1697.7784)M(Oxidation)EEIFDDASPGK	59	snf2h	snf2h1	48.5	Q(Gln->pyro-Glu)K(3270.4623)EIQEPDPTYEEK	73	snf2h	snf2h1	27.9	positional variants	33.5	3.7	adp	8.6
707.136	5	-1.3	Z20170518-38_filtered	46.429	1	IDEAESLNDEE(1767.8652)LEEK+Incorrect Mono 1Da	832	snf2h	snf2h_hand	31.6	ANEK(1743.7687)WGRDDIENIAR+Incorrect Mono 1Da	861	snf2h	snf2h_sant	17.4	positional variants	43.2	3.7	adp	1.5
829.173	4	1.4	Z20170518-38_filtered	59.722	1	LLTQGFTNWNK(1835.8730)R	849	snf2h	snf2h_sant	40.8	TPEEVIE(1458.7732)YSAVFWER	884	snf2h	snf2h_sant	35.3	unique	37.8	3.7	adp	4
786.109	4	-1.5	Z20170518-39_filtered	46.708	1	NFTMDTESSVYNFEGE(836.4756)DYR+Incorrect Mono 1Da	719	snf2h	snf2h4	20.6	VSEPK(2284.9219)APK+Incorrect Mono 1Da	760	snf2h	snf2h_hand	-0.1	positional variants	42.3	3.7	adp	1.5
1092.01	4	0.7	Z20170518-38_filtered	40.308	1	1002.4328-GSM(Oxidation)SSAAEPPPPPPPESAPSKPAASIASGGSNSSNK	1	snf2h	snf2h1	60.2	ENME(3343.5627)LEEK	1016	snf2h	snf2h5	8.7	positional variants	35.6	3.7	adp	7.3
966.79	3	0.6	Z20170518-39_filtered	48.373	1	Q(Gln->pyro-Glu)DSINAYNE(1334.6619)PNSTK	549	snf2h	snf2h_reca2	37.5	DFNQFIK(1544.6743)ANEK	857	snf2h	snf2h_sant	34.3	unique	39.7	3.7	adp	2
1033	4	0.3	Z20170518-37_filtered	59.706	1	GGPEGVAAQAVASAASAGPADAEME(854.4974)EIFDDASPGK+Incorrect Mono 1Da	61	snf2h	snf2h1	39.5	ALDTK(3254.4674)IGR+Incorrect Mono 1Da	926	snf2h	snf2h_slide	0.8	positional variants	43.4	3.7	adp	1.7
987.472	4	-0.8	Z20170518-37_filtered	52.648	1	GGPEGVAAQAVASAASAGPADAE(656.3857)M(Oxidation)EEIFDDASPGK+Incorrect Mono 1Da	59	snf2h	snf2h1	49	K(3270.4623)ALDTK+Incorrect Mono 1Da	921	snf2h	snf2h_slide	2.4	positional variants	38.3	3.7	adp	1.3
1033	4	0.3	Z20170518-37_filtered	59.706	1	GGPEGVAAQAVASAASAGPADAEMEE(854.4974)IFDDASPGK+Incorrect Mono 1Da	62	snf2h	snf2h1	39.5	ALDTK(3254.4674)IGR+Incorrect Mono 1Da	926	snf2h	snf2h_slide	0.8	positional variants	43.4	3.7	adp	1.7
509.768	4	-0.2	Z20170518-40_filtered	38.552	1	LLTQGFTNWNK(557.2558)R+Incorrect Mono 1Da	849	snf2h	snf2h_sant	4.8	E(1458.7732)QGSR+Incorrect Mono 1Da	499	snf2h	snf2h_reca2	1.4	unique	48.1	3.7	adp	3
1046.76	4	-0.4	Z20170518-37_filtered	44.806	1	821.4436-GSM(Oxidation)SSAAEPPPPPPPESAPSKPAASIASGGSNSSNK	1	snf2h	snf2h1	70.2	E(3343.5627)ILFYR	790	snf2h	snf2h_hand	7	unique	33.8	3.7	adp	11
789.138	4	-0.2	Z20170518-39_filtered	60.126	1	K(1835.8730)ANYAVDAYFR	741	snf2h	snf2h_hand	40.8	TPEEVIEYSAVFWE(1298.6408)R	891	snf2h	snf2h_sant	37.2	unique	36.5	3.7	adp	4.5
897.007	4	5.1	Z20170518-37_filtered	83.284	1	VGAGAPVYLAAVLEYLTAE(668.3970)ILELAGNAAR+Incorrect Mono 1Da	61	h2a	h2a_ap	52.1	GLGK(2896.5698)GGAK+Incorrect Mono 1Da	12	h4	h4_tail	-0.1	unique	43.1	3.7	adp	3
904.405	3	-1	Z20170518-38_filtered	45.756	1	TEQEEDEELLTE(943.4182)SSK+Incorrect Mono 1Da	159	snf2h	snf2h_auton	12.2	K(1747.7636)M(Oxidation)DGAPDGR+Incorrect Mono 1Da	1038	snf2h	snf2h5	-1.9	unique	43.2	3.7	adp	4
1134.03	4	-1.9	Z20170518-37_filtered	44.561	1	1170.5458-GSM(Oxidation)SSAAEPPPPPPPESAPSKPAASIASGGSNSSNK	1	snf2h	snf2h1	71	ANYAVD(3343.5627)AYFR	747	snf2h	snf2h_hand	11.9	unique	34.1	3.6	adp	7.5
832.398	3	0.5	Z20170518-39_filtered	44.639	1	IDEAESLNDE(731.3867)ELEEK+Incorrect Mono 1Da	831	snf2h	snf2h_hand	19.9	K(1743.7687)FNWR+Incorrect Mono 1Da	301	snf2h	snf2h_reca1	1.4	positional variants	45.4	3.6	adp	2
797.006	5	1	Z20170518-37_filtered	58.723	1	FEYLLK(1458.6515)QTELFAHFIQPAAQK	99	snf2h	snf2h_auton	46	E(2503.3264)IQEPDPTYEEK	74	snf2h	snf2h1	42.5	unique	39.2	3.6	adp	4
1035.99	4	0.6	Z20170518-38_filtered	61.555	1	EVEGK(1743.7687)TPEEVIEYSAVFWER	877	snf2h	snf2h_sant	55.5	IDEAE(2378.1430)SLNDEELEEK	826	snf2h	snf2h_hand	34.9	unique	36.5	3.6	adp	2
1069.01	4	-0.9	Z20170518-38_filtered	43.688	1	926.4458-GSMSSAAEPPPPPPPESAPSKPAASIASGGSNSSNK	1	snf2h	snf2h1	63.8	DD(3327.5677)IENIAR	866	snf2h	snf2h_sant	7.3	positional variants	35.9	3.6	adp	5
789.387	4	-2.7	Z20170518-39_filtered	58.817	1	K(1835.8730)ANYAVDAYFR+Incorrect Mono 1Da	741	snf2h	snf2h_hand	32.9	TPEE(1298.6408)VIEYSAVFWER+Incorrect Mono 1Da	881	snf2h	snf2h_sant	31	positional variants	40.7	3.6	adp	2.5
1055.76	4	0.9	Z20170518-37_filtered	39.578	1	857.4429-GSM(Oxidation)SSAAEPPPPPPPESAPSKPAASIASGGSNSSNK	1	snf2h	snf2h1	75	IM(Oxidation)AQIE(3343.5627)R	907	snf2h	snf2h_slide	1.6	unique	32.9	3.6	adp	20
747.084	4	-0.2	Z20170518-39_filtered	39.185	1	IDEAESLNDE(1221.5262)ELEEK+Incorrect Mono 1Da	831	snf2h	snf2h_hand	23.1	GK(1743.7687)NYTEEEDR+Incorrect Mono 1Da	947	snf2h	snf2h_slide	18.2	positional variants	46	3.6	adp	1.3
1040.26	4	-1.4	Z20170518-38_filtered	56.541	1	GGPEGVAAQAVASAASAGPADAE(883.5240)MEEIFDDASPGK+Incorrect Mono 1Da	59	snf2h	snf2h1	63.7	IGQTK(3254.4674)TVR+Incorrect Mono 1Da	602	snf2h	snf2h_reca2	-1.4	unique	45.9	3.6	adp	2.2
913.239	4	-1.7	Z20170518-38_filtered	61.708	1	Q(Gln->pyro-Glu)TELFAHFIQPAAQK(1213.6489)TPTSPLK	114	snf2h	snf2h_auton	57.5	C(Carbamidomethyl)NTLITLIE(2417.2743)R	1011	snf2h	snf2h_slide	31.7	unique	32.7	3.6	adp	7
706.687	3	-1.3	Z20170518-40_filtered	52.787	1	FDWFLK(1018.4720)SR+Incorrect Mono 1Da	992	snf2h	snf2h_slide	8	ENVYD(1079.5553)ELR+Incorrect Mono 1Da	973	snf2h	snf2h_slide	5.2	positional variants	43.3	3.6	adp	5.8
711.621	4	1.3	Z20170518-38_filtered	53.887	1	TLQTISLLGYMK(1018.4720)HYR+Incorrect Mono 1Da	225	snf2h	snf2h_reca1	15.6	E(1804.9658)NVYDELR+Incorrect Mono 1Da	969	snf2h	snf2h_slide	8.6	unique	44.7	3.6	adp	2.5
528.314	3	-1	Z20170518-39_filtered	46.054	1	K(872.5008)TIGYK+Incorrect Mono 1Da	796	snf2h	snf2h_hand	8	LFELLE(690.4065)K+Incorrect Mono 1Da	788	snf2h	snf2h_hand	6.3	unique	44.6	3.6	adp	8.3
1035.76	4	0.8	Z20170518-37_filtered	46.319	1	793.4374-GSMSSAAEPPPPPPPESAPSKPAASIASGGSNSSNK	1	snf2h	snf2h1	69.1	FE(3327.5677)YLLK	95	snf2h	snf2h_auton	4.5	unique	29.6	3.6	adp	13
513.11	5	-0.6	Z20170518-38_filtered	49.852	1	VTIAQGGVLPNIQSVLLPK(485.2598)K+Incorrect Mono 1Da	118	h2a	h2a_ctail	16.4	TD(2056.2408)LR+Incorrect Mono 1Da	81	h3	h3	-2.3	unique	52.2	3.6	adp	2
765.067	3	0.7	Z20170518-39_filtered	49.236	1	STLHNWMSE(912.5393)FK+Incorrect Mono 1Da	249	snf2h	snf2h_reca1	9.4	SK(1360.6234)LSEIVR+Incorrect Mono 1Da	321	snf2h	snf2h_reca1	2.2	unique	45.3	3.6	adp	6
1139.16	5	-2.9	Z20170518-37_filtered	66.631	1	GGPEGVAAQAVASAASAGPADAEME(2417.2743)EIFDDASPGK+Incorrect Mono 1Da	61	snf2h	snf2h1	51.9	Q(Gln->pyro-Glu)TELFAHFIQPAAQK(3254.4674)TPTSPLK+Incorrect Mono 1Da	114	snf2h	snf2h_auton	9.8	positional variants	35.2	3.6	adp	2.5
706.687	3	-1.3	Z20170518-40_filtered	52.787	1	FDWFLK(1018.4720)SR+Incorrect Mono 1Da	992	snf2h	snf2h_slide	8	ENVYDE(1079.5553)LR+Incorrect Mono 1Da	974	snf2h	snf2h_slide	2.1	positional variants	43.3	3.6	adp	2.8
978.998	4	-0.5	Z20170518-38_filtered	50.188	1	QTELFAHFIQPAAQK(1458.6515)TPTSPLK+Incorrect Mono 1Da	114	snf2h	snf2h_auton	25.1	EIQEPD(2434.3009)PTYEEK+Incorrect Mono 1Da	79	snf2h	snf2h1	12.1	unique	40.3	3.6	adp	3
760.126	4	1.7	Z20170518-38_filtered	48.284	1	EK(1458.6515)LLTQGFTNWNK	838	snf2h	snf2h_hand	37.2	E(1559.8096)IQEPDPTYEEK	74	snf2h	snf2h1	35.9	unique	40.2	3.5	adp	1.5
1139.16	5	-2.9	Z20170518-37_filtered	66.631	1	GGPEGVAAQAVASAASAGPADAEMEE(2417.2743)IFDDASPGK+Incorrect Mono 1Da	62	snf2h	snf2h1	51.3	Q(Gln->pyro-Glu)TELFAHFIQPAAQK(3254.4674)TPTSPLK+Incorrect Mono 1Da	114	snf2h	snf2h_auton	9.8	positional variants	35.2	3.5	adp	2.5
789.387	4	-2.7	Z20170518-39_filtered	58.817	1	K(1835.8730)ANYAVDAYFR+Incorrect Mono 1Da	741	snf2h	snf2h_hand	32.9	TPEEVIE(1298.6408)YSAVFWER+Incorrect Mono 1Da	884	snf2h	snf2h_sant	28.8	positional variants	38	3.5	adp	2.5
943.688	4	0.8	Z20170518-38_filtered	58.321	1	NFTMDTE(1467.7874)SSVYNFEGEDYR	710	snf2h	snf2h4	31.9	IAFTEWIEPPK(2284.9219)R	737	snf2h	snf2h_hand	30.5	unique	37.1	3.5	adp	2.5
715.009	6	0.3	Z20170518-37_filtered	54.141	1	NFTMDTESSVYNFEGED(1981.0785)YR	720	snf2h	snf2h4	49.8	EKQK(2284.9219)IAFTEWIEPPKR	726	snf2h	snf2h4	29.7	positional variants	37	3.5	adp	1.4
1033	4	0.3	Z20170518-37_filtered	59.706	1	GGPEGVAAQAVASAASAGPADAE(854.4974)MEEIFDDASPGK+Incorrect Mono 1Da	59	snf2h	snf2h1	37.9	ALDTK(3254.4674)IGR+Incorrect Mono 1Da	926	snf2h	snf2h_slide	0.8	positional variants	41.8	3.5	adp	2.2
980.714	4	-0.2	Z20170518-38_filtered	36.5	1	557.2558-GSM(Oxidation)SSAAEPPPPPPPESAPSKPAASIASGGSNSSNK	1	snf2h	snf2h1	64.1	E(3343.5627)QGSR	499	snf2h	snf2h_reca2	3.9	unique	31.8	3.5	adp	7.5
957.507	3	0.3	Z20170518-38_filtered	60.613	1	ESE(1136.6991)ITDEDIDGILER	670	snf2h	snf2h_negc	38	MVVLDK(1714.7897)LLPK	492	snf2h	snf2h_reca2	30.4	positional variants	38.5	3.5	adp	1.8
1214.07	4	0.4	Z20170518-38_filtered	63.85	1	GGPEGVAAQAVASAASAGPADAE(1578.7678)MEEIFDDASPGK+Incorrect Mono 1Da	59	snf2h	snf2h1	54.9	LGFDK(3254.4674)ENVYDELR+Incorrect Mono 1Da	968	snf2h	snf2h_slide	10.7	unique	37.1	3.5	adp	1.3
1266.1	4	0.3	Z20170518-37_filtered	50.453	1	1714.7897-GSMSSAAEPPPPPPPESAPSKPAASIASGGSNSSNK	1	snf2h	snf2h1	62.6	ESEITDEDID(3327.5677)GILER	677	snf2h	snf2h_negc	20.4	positional variants	33.9	3.5	adp	1.7
632.084	4	0.5	Z20170518-39_filtered	53.538	1	TPEEVIEYSAVFWE(669.4174)R+Incorrect Mono 1Da	891	snf2h	snf2h_sant	16.8	K(1835.8730)QLATK+Incorrect Mono 1Da	18	h3	h3_tail	3.1	unique	37.2	3.5	adp	2
957.507	3	0.3	Z20170518-38_filtered	60.613	1	E(1136.6991)SEITDEDIDGILER	668	snf2h	snf2h_negc	37	MVVLDK(1714.7897)LLPK	492	snf2h	snf2h_reca2	30.4	positional variants	37.5	3.5	adp	1.8
524.49	5	-0.4	Z20170518-38_filtered	55.173	1	TLQTISLLGYMK(793.4374)HYR+Incorrect Mono 1Da	225	snf2h	snf2h_reca1	13.7	FE(1804.9658)YLLK+Incorrect Mono 1Da	95	snf2h	snf2h_auton	2.7	unique	44.9	3.4	adp	5
872.445	3	-0.6	Z20170518-39_filtered	44.338	1	NPE(1334.6619)LPNAAQAQK	807	snf2h	snf2h_hand	41.9	DFNQFIK(1261.6415)ANEK	857	snf2h	snf2h_sant	34	unique	39.3	3.4	adp	2.5
639.533	5	-0.1	Z20170518-38_filtered	50.489	1	APRPPK(926.4458)QPNVQDFQFFPPR+Incorrect Mono 1Da	769	snf2h	snf2h_hand	36.4	D(2247.1701)DIENIAR+Incorrect Mono 1Da	865	snf2h	snf2h_sant	13.2	unique	37.2	3.4	adp	3
1073.01	4	0.2	Z20170518-37_filtered	41.983	1	926.4458-GSM(Oxidation)SSAAEPPPPPPPESAPSKPAASIASGGSNSSNK	1	snf2h	snf2h1	73.3	DDIE(3343.5627)NIAR	868	snf2h	snf2h_sant	3.9	positional variants	30.7	3.4	adp	2
728.854	4	0	Z20170518-39_filtered	59.3	1	K(1593.7320)ANYAVDAYFR+Incorrect Mono 1Da	741	snf2h	snf2h_hand	30	VLDILED(1298.6408)YC(Carbamidomethyl)MWR+Incorrect Mono 1Da	519	snf2h	snf2h_reca2	17	unique	38.3	3.4	adp	2.5
861.165	4	-0.9	Z20170518-38_filtered	59.357	1	NFTMDTESSVYNFE(1136.6991)GEDYR+Incorrect Mono 1Da	717	snf2h	snf2h4	20.9	MVVLDK(2284.9219)LLPK+Incorrect Mono 1Da	492	snf2h	snf2h_reca2	8.3	unique	42.1	3.4	adp	2
707.704	3	-1.3	Z20170518-39_filtered	35.861	1	K(1204.5724)SAPATGGVK+Incorrect Mono 1Da	27	h3	h3_tail	9.2	FITDNTVEE(896.5080)R+Incorrect Mono 1Da	617	snf2h	snf2h_reca2	3.1	unique	43.9	3.4	adp	2.5
645.672	3	-0.6	Z20170518-39_filtered	36.059	1	K(1018.4720)SAPATGGVK+Incorrect Mono 1Da	27	h3	h3_tail	19.9	E(896.5080)NVYDELR+Incorrect Mono 1Da	969	snf2h	snf2h_slide	14.8	unique	40.7	3.4	adp	2.5
806.382	5	0.5	Z20170518-38_filtered	56.448	1	NFTMDTESSVYNFE(1723.9410)GEDYR	717	snf2h	snf2h4	39.6	QK(2284.9219)IAFTEWIEPPKR	726	snf2h	snf2h4	32.7	unique	39.4	3.4	adp	5.7
1138.55	4	0.1	Z20170518-38_filtered	43.951	1	1204.5724-GSMSSAAEPPPPPPPESAPSKPAASIASGGSNSSNK	1	snf2h	snf2h1	68.8	FITDNTVE(3327.5677)ER	616	snf2h	snf2h_reca2	3.5	positional variants	30.9	3.3	adp	7.2
1138.55	4	0.1	Z20170518-38_filtered	43.951	1	1204.5724-GSMSSAAEPPPPPPPESAPSKPAASIASGGSNSSNK	1	snf2h	snf2h1	68.8	FITDNTVEE(3327.5677)R	617	snf2h	snf2h_reca2	3.5	positional variants	30.9	3.3	adp	4.2
1072.53	4	1.2	Z20170518-37_filtered	39.041	1	924.5029-GSM(Oxidation)SSAAEPPPPPPPESAPSKPAASIASGGSNSSNK	1	snf2h	snf2h1	86.5	LVD(3343.5627)QNLNK	641	snf2h	snf2h_reca2	9.2	unique	29	3.3	adp	10
634.678	3	-1.3	Z20170518-39_filtered	43.205	1	LSK(793.4374)MGESSLR+Incorrect Mono 1Da	696	snf2h	snf2h_negc	19.7	FE(1088.5648)YLLK+Incorrect Mono 1Da	95	snf2h	snf2h_auton	5.5	unique	41.9	3.3	adp	4
706.571	5	-1.5	Z20170518-38_filtered	47.408	1	APRPPK(1261.6415)QPNVQDFQFFPPR+Incorrect Mono 1Da	769	snf2h	snf2h_hand	37.2	NPE(2247.1701)LPNAAQAQK+Incorrect Mono 1Da	807	snf2h	snf2h_hand	21.1	unique	38	3.3	adp	8
963.681	5	0.2	Z20170518-37_filtered	48.679	1	1467.7874-GSMSSAAEPPPPPPPESAPSKPAASIASGGSNSSNK	1	snf2h	snf2h1	80.2	IAFTE(3327.5677)WIEPPKR	731	snf2h	snf2h4	14.8	unique	27.5	3.3	adp	9
673.616	4	1.1	Z20170518-38_filtered	54.761	1	LLTQGFTNWNK(1213.6489)R	849	snf2h	snf2h_sant	46.6	C(Carbamidomethyl)NTLITLIE(1458.7732)R	1011	snf2h	snf2h_slide	29.8	unique	32.4	3.3	adp	5
758.868	4	0.7	Z20170518-39_filtered	55.218	1	ESEITDEDIDGILE(1298.6408)R	681	snf2h	snf2h_negc	43.2	K(1714.7897)ANYAVDAYFR	741	snf2h	snf2h_hand	29.1	unique	33.6	3.3	adp	2
1181.31	4	1.4	Z20170518-38_filtered	61.411	1	NFTMDTESSVYNFEGE(2417.2743)DYR+Incorrect Mono 1Da	719	snf2h	snf2h4	16.4	Q(Gln->pyro-Glu)TELFAHFIQPAAQK(2284.9219)TPTSPLK+Incorrect Mono 1Da	114	snf2h	snf2h_auton	13.1	positional variants	40.6	3.3	adp	1.2
1181.31	4	1.4	Z20170518-38_filtered	61.411	1	NFTMDTESSVYNFEGED(2417.2743)YR+Incorrect Mono 1Da	720	snf2h	snf2h4	16.4	Q(Gln->pyro-Glu)TELFAHFIQPAAQK(2284.9219)TPTSPLK+Incorrect Mono 1Da	114	snf2h	snf2h_auton	13.1	positional variants	40.6	3.3	adp	1.2
1181.31	4	1.4	Z20170518-38_filtered	61.411	1	NFTMDTESSVYNFE(2417.2743)GEDYR+Incorrect Mono 1Da	717	snf2h	snf2h4	13.9	Q(Gln->pyro-Glu)TELFAHFIQPAAQK(2284.9219)TPTSPLK+Incorrect Mono 1Da	114	snf2h	snf2h_auton	13.1	positional variants	40.6	3.3	adp	1.2
1028.99	4	0.6	Z20170518-38_filtered	65.875	1	EVEGK(1714.7897)TPEEVIEYSAVFWER+Incorrect Mono 1Da	877	snf2h	snf2h_sant	36.7	E(2378.1430)SEITDEDIDGILER+Incorrect Mono 1Da	668	snf2h	snf2h_negc	26	positional variants	37.1	3.3	adp	1.5
1028.99	4	0.6	Z20170518-38_filtered	65.875	1	EVEGK(1714.7897)TPEEVIEYSAVFWER+Incorrect Mono 1Da	877	snf2h	snf2h_sant	36.7	ESE(2378.1430)ITDEDIDGILER+Incorrect Mono 1Da	670	snf2h	snf2h_negc	26	positional variants	37.1	3.3	adp	1.5
785.696	3	0.6	Z20170518-39_filtered	40.99	1	K(1036.4098)ANYAVDAYFR+Incorrect Mono 1Da	741	snf2h	snf2h_hand	26.6	NYTE(1298.6408)EEDR+Incorrect Mono 1Da	951	snf2h	snf2h_slide	13.1	unique	39.5	3.3	adp	3
994.232	4	-0.1	Z20170518-38_filtered	39.927	1	627.3228-GSMSSAAEPPPPPPPESAPSKPAASIASGGSNSSNK	1	snf2h	snf2h1	66.3	E(3327.5677)EQLK	817	snf2h	snf2h_hand	5.5	unique	28.7	3.3	adp	9.7
1003.5	4	1.6	Z20170518-38_filtered	51.256	1	APRPPK(1743.7687)QPNVQDFQFFPPR+Incorrect Mono 1Da	769	snf2h	snf2h_hand	34.5	IDEAESLNDE(2247.1701)ELEEK+Incorrect Mono 1Da	831	snf2h	snf2h_hand	12.6	positional variants	39.6	3.3	adp	2.4
1003.5	4	1.6	Z20170518-38_filtered	51.256	1	APRPPK(1743.7687)QPNVQDFQFFPPR+Incorrect Mono 1Da	769	snf2h	snf2h_hand	34.5	IDEAESLND(2247.1701)EELEEK+Incorrect Mono 1Da	830	snf2h	snf2h_hand	12.6	positional variants	39.6	3.3	adp	1.9
821.219	5	0.9	Z20170518-38_filtered	59.852	1	APRPPK(1835.8730)QPNVQDFQFFPPR	769	snf2h	snf2h_hand	51	TPEE(2247.1701)VIEYSAVFWER	881	snf2h	snf2h_sant	31.8	positional variants	35.4	3.3	adp	3.7
797.005	5	0.3	Z20170518-37_filtered	60.438	1	FEYLLK(1458.6515)QTELFAHFIQPAAQK	99	snf2h	snf2h_auton	52.2	EIQEPDPTYEE(2503.3264)K	84	snf2h	snf2h_auton	30.6	positional variants	34	3.3	adp	4
797.005	5	0.3	Z20170518-37_filtered	60.438	1	FEYLLK(1458.6515)QTELFAHFIQPAAQK	99	snf2h	snf2h_auton	52.2	EIQEPDPTYE(2503.3264)EK	83	snf2h	snf2h1	30	positional variants	34	3.3	adp	4.5
1052	4	0.6	Z20170518-37_filtered	38.241	1	842.3770-GSM(Oxidation)SSAAEPPPPPPPESAPSKPAASIASGGSNSSNK	1	snf2h	snf2h1	74.7	ND(3343.5627)EELNK	90	h2a	h2a_ap	5.5	positional variants	27.8	3.3	adp	2.3
1052	4	0.6	Z20170518-37_filtered	38.241	1	842.3770-GSM(Oxidation)SSAAEPPPPPPPESAPSKPAASIASGGSNSSNK	1	snf2h	snf2h1	74.7	NDE(3343.5627)ELNK	91	h2a	h2a_ap	5.5	positional variants	27.8	3.3	adp	1.3
1055.53	4	0.5	Z20170518-38_filtered	48.772	1	872.5008-GSMSSAAEPPPPPPPESAPSKPAASIASGGSNSSNK	1	snf2h	snf2h1	75.2	LFELLE(3327.5677)K	788	snf2h	snf2h_hand	2.8	unique	28.3	3.2	adp	9
929.412	3	-0.3	Z20170518-39_filtered	37.458	1	Q(Gln->pyro-Glu)DSINAYNE(1221.5262)PNSTK+Incorrect Mono 1Da	549	snf2h	snf2h_reca2	22.6	GK(1544.6743)NYTEEEDR+Incorrect Mono 1Da	947	snf2h	snf2h_slide	10.1	unique	41.9	3.2	adp	4
1206.31	4	-1.4	Z20170518-38_filtered	41.228	1	1458.6515-GSM(Oxidation)SSAAEPPPPPPPESAPSKPAASIASGGSNSSNK+Incorrect Mono 1Da	1	snf2h	snf2h1	68.8	EIQEPD(3343.5627)PTYEEK+Incorrect Mono 1Da	79	snf2h	snf2h1	21.3	unique	28.2	3.2	adp	6.7
706.717	3	-0.8	Z20170518-39_filtered	31.546	1	NPE(836.4756)LPNAAQAQK+Incorrect Mono 1Da	807	snf2h	snf2h_hand	24.3	VSEPK(1261.6415)APK+Incorrect Mono 1Da	760	snf2h	snf2h_hand	6.3	unique	36.8	3.2	adp	23
803.991	5	0.2	Z20170518-37_filtered	54.987	1	GGPEGVAAQAVASAASAGPADAEME(741.4385)EIFDDASPGK+Incorrect Mono 1Da	61	snf2h	snf2h1	32.5	IK(3254.4674)KDEK+Incorrect Mono 1Da	130	snf2h	snf2h_auton	2.8	positional variants	43.5	3.2	adp	1.4
803.991	5	0.2	Z20170518-37_filtered	54.987	1	GGPEGVAAQAVASAASAGPADAEMEE(741.4385)IFDDASPGK+Incorrect Mono 1Da	62	snf2h	snf2h1	32.5	IK(3254.4674)KDEK+Incorrect Mono 1Da	130	snf2h	snf2h_auton	2.8	positional variants	43.5	3.2	adp	2.1
762.863	4	-0.5	Z20170518-38_filtered	44.606	1	SVC(Carbamidomethyl)LIGDK(1743.7687)EQR	266	snf2h	snf2h_reca1	29.6	IDEAESLND(1285.6449)EELEEK	830	snf2h	snf2h_hand	27.1	positional variants	35.6	3.2	adp	1.5
968.465	3	-1.6	Z20170518-38_filtered	48.251	1	EIQEPDPTYEEK(793.4374)MQTDR+Incorrect Mono 1Da	85	snf2h	snf2h_auton	18.7	FE(2089.9262)YLLK+Incorrect Mono 1Da	95	snf2h	snf2h_auton	-1.7	unique	48.2	3.2	adp	5.2
765.912	4	-1	Z20170518-38_filtered	52.323	1	APRPPK(793.4374)QPNVQDFQFFPPR+Incorrect Mono 1Da	769	snf2h	snf2h_hand	29.9	FE(2247.1701)YLLK+Incorrect Mono 1Da	95	snf2h	snf2h_auton	5.5	unique	37.4	3.2	adp	8
628.062	4	0.5	Z20170518-38_filtered	23.958	1	TEQEEDE(741.4385)ELLTESSK+Incorrect Mono 1Da	154	snf2h	snf2h_auton	22.3	IK(1747.7636)KDEK+Incorrect Mono 1Da	130	snf2h	snf2h_auton	5.7	unique	39.1	3.2	adp	4.1
807.396	3	-0.3	Z20170518-38_filtered	39.493	1	IDEAESLNDEELE(656.3857)EK+Incorrect Mono 1Da	834	snf2h	snf2h_hand	14.2	K(1743.7687)ALDTK+Incorrect Mono 1Da	921	snf2h	snf2h_slide	4.4	unique	34.2	3.2	adp	1.5
704.101	4	-0.1	Z20170518-38_filtered	38.549	1	LDGQTPHDE(1645.8424)R	539	snf2h	snf2h_reca2	37	KDEK(1148.5210)QNLLSVGDYR	134	snf2h	snf2h_auton	30	positional variants	34.8	3.2	adp	1.5
1018.88	5	0.7	Z20170518-37_filtered	45.288	1	1743.7687-GSMSSAAEPPPPPPPESAPSKPAASIASGGSNSSNK	1	snf2h	snf2h1	70.8	IDEAESLNDEE(3327.5677)LEEK	832	snf2h	snf2h_hand	17.6	positional variants	28.9	3.2	adp	1.1
972.969	4	-0.1	Z20170518-38_filtered	38.725	1	542.2700-GSMSSAAEPPPPPPPESAPSKPAASIASGGSNSSNK	1	snf2h	snf2h1	70.5	E(3327.5677)VEGK	873	snf2h	snf2h_sant	0.8	unique	28.5	3.2	adp	7.8
621.062	4	-0.5	Z20170518-39_filtered	45.133	1	LLTQGFTNWNK(1002.4328)R+Incorrect Mono 1Da	849	snf2h	snf2h_sant	7.9	ENME(1458.7732)LEEK+Incorrect Mono 1Da	1016	snf2h	snf2h5	5.7	unique	39.8	3.2	adp	2.5
653.67	3	2.8	Z20170518-39_filtered	49.524	1	K(695.3279)ESYAIYVYK	31	h2b	h2b_tail	27.9	TLYGFGG-1244.6441	102	h4	h4	2.1	unique	36.4	3.2	adp	2
495.271	5	0.5	Z20170518-38_filtered	49.78	1	YK(1311.6863)APFHQLR+Incorrect Mono 1Da	931	snf2h	snf2h_slide	22.3	IAFTEWIE(1140.6192)PPK+Incorrect Mono 1Da	734	snf2h	snf2h4	15.2	unique	39	3.2	adp	4
1077.86	3	-0.5	Z20170518-38_filtered	53.459	1	IAFTEWIEPPK(1743.7687)R+Incorrect Mono 1Da	737	snf2h	snf2h_hand	15.2	IDEAE(1467.7874)SLNDEELEEK+Incorrect Mono 1Da	826	snf2h	snf2h_hand	4.3	unique	39.3	3.2	adp	3
711.123	4	-0.6	Z20170518-38_filtered	46.509	1	EK(1261.6415)LLTQGFTNWNK+Incorrect Mono 1Da	838	snf2h	snf2h_hand	31.1	NPE(1559.8096)LPNAAQAQK+Incorrect Mono 1Da	807	snf2h	snf2h_hand	24.7	unique	38.6	3.2	adp	2
784.632	4	-0.5	Z20170518-38_filtered	56.958	1	ESEITD(1400.6970)EDIDGILER+Incorrect Mono 1Da	673	snf2h	snf2h_negc	29.9	DIDILNSAGK(1714.7897)MDK+Incorrect Mono 1Da	442	snf2h	snf2h_reca2	11.8	positional variants	36.8	3.2	adp	1.6
1143.15	5	1.4	Z20170518-37_filtered	59.904	1	2348.1432-GSM(Oxidation)SSAAEPPPPPPPESAPSKPAASIASGGSNSSNK+Incorrect Mono 1Da	1	snf2h	snf2h1	57.8	DVLLPGE(3343.5627)WDVC(Carbamidomethyl)VTSYEMLIK+Incorrect Mono 1Da	281	snf2h	snf2h_reca1	37.2	unique	37	3.1	adp	1.5
1021.23	4	-0.5	Z20170518-38_filtered	43.026	1	735.3340-GSMSSAAEPPPPPPPESAPSKPAASIASGGSNSSNK	1	snf2h	snf2h1	66.4	E(3327.5677)WYTR	424	snf2h	snf2h_reca2	4.1	unique	29.1	3.1	adp	3
1008.52	4	7.2	Z20170518-38_filtered	66.245	1	Q(Gln->pyro-Glu)TELFAHFIQPAAQK(1593.7320)TPTSPLK+Incorrect Mono 1Da	114	snf2h	snf2h_auton	29.2	VLDILE(2417.2743)DYC(Carbamidomethyl)MWR+Incorrect Mono 1Da	518	snf2h	snf2h_reca2	20.6	unique	39.5	3.1	adp	5.5
1147.79	4	1	Z20170518-37_filtered	57.503	1	GGPEGVAAQAVASAASAGPADAEM(Oxidation)E(1298.6408)EIFDDASPGK	61	snf2h	snf2h1	119.2	K(3270.4623)ANYAVDAYFR	741	snf2h	snf2h_hand	10.1	positional variants	18.6	3.1	adp	2.3
1147.79	4	1	Z20170518-37_filtered	57.503	1	GGPEGVAAQAVASAASAGPADAEM(Oxidation)EE(1298.6408)IFDDASPGK	62	snf2h	snf2h1	119.2	K(3270.4623)ANYAVDAYFR	741	snf2h	snf2h_hand	10.1	positional variants	18.6	3.1	adp	2.3
1038.49	4	0.2	Z20170518-37_filtered	57.361	1	GGPEGVAAQAVASAASAGPAD(876.4454)AEMEEIFDDASPGK+Incorrect Mono 1Da	57	snf2h	snf2h1	53.8	EFK(3254.4674)TTNR+Incorrect Mono 1Da	330	snf2h	snf2h_reca1	-2.3	unique	37.5	3.1	adp	2.8
704.101	4	-0.1	Z20170518-38_filtered	38.549	1	LDGQTPHDE(1645.8424)R	539	snf2h	snf2h_reca2	37	K(1148.5210)DEKQNLLSVGDYR	131	snf2h	snf2h_auton	29	positional variants	33.8	3.1	adp	6
674.151	4	-0.1	Z20170518-38_filtered	55.204	1	GVLK(1306.7357)VFLENVIR	59	h4	h4	48.4	D(1367.8289)NIQGITKPAIR	24	h4	h4_tail	32.5	unique	35.6	3.1	adp	5
1033.15	3	-0.1	Z20170518-38_filtered	48.578	1	IDEAESLND(1334.6619)EELEEK	830	snf2h	snf2h_hand	53.6	DFNQFIK(1743.7687)ANEK	857	snf2h	snf2h_sant	30.1	unique	30.9	3.1	adp	2.2
821.219	5	0.9	Z20170518-38_filtered	59.852	1	APRPPK(1835.8730)QPNVQDFQFFPPR	769	snf2h	snf2h_hand	51	TPEEVIE(2247.1701)YSAVFWER	884	snf2h	snf2h_sant	28.5	positional variants	32.1	3.1	adp	5.2
593.062	4	0.6	Z20170518-39_filtered	37.115	1	NPE(1088.5648)LPNAAQAQK	807	snf2h	snf2h_hand	33	LSK(1261.6415)MGESSLR	696	snf2h	snf2h_negc	30.7	unique	39.2	3.1	adp	5
1015.75	4	1.2	Z20170518-38_filtered	40.24	1	697.4123-GSM(Oxidation)SSAAEPPPPPPPESAPSKPAASIASGGSNSSNK	1	snf2h	snf2h1	71	LSE(3343.5627)IVR	324	snf2h	snf2h_reca1	0.8	unique	27.8	3.1	adp	11
762.386	3	-1.6	Z20170518-39_filtered	44.738	1	FEDSPSYVK(841.4480)WGK+Incorrect Mono 1Da	178	snf2h	snf2h2	12.4	IMAQIE(1423.6772)R+Incorrect Mono 1Da	907	snf2h	snf2h_slide	-3.2	unique	48.8	3.1	adp	3
659.304	4	0.3	Z20170518-39_filtered	47.08	1	LGFDK(1036.4098)ENVYDELR	968	snf2h	snf2h_slide	33.3	NYTEEE(1578.7678)DR	953	snf2h	snf2h_slide	30.9	unique	35.9	3.1	adp	1.3
913.943	4	-0.8	Z20170518-38_filtered	46.537	1	EEQLK(1261.6415)IDEAESLNDEELEEK+Incorrect Mono 1Da	821	snf2h	snf2h_hand	54.2	NPE(2371.0915)LPNAAQAQK+Incorrect Mono 1Da	807	snf2h	snf2h_hand	24.1	unique	29.7	3.1	adp	4
1105.14	5	1.7	Z20170518-37_filtered	62.132	1	GGPEGVAAQAVASAASAGPADAE(2247.1701)MEEIFDDASPGK+Incorrect Mono 1Da	59	snf2h	snf2h1	54.9	APRPPK(3254.4674)QPNVQDFQFFPPR+Incorrect Mono 1Da	769	snf2h	snf2h_hand	0.5	positional variants	35	3.1	adp	3
1105.14	5	1.7	Z20170518-37_filtered	62.132	1	GGPEGVAAQAVASAASAGPADAEME(2247.1701)EIFDDASPGK+Incorrect Mono 1Da	61	snf2h	snf2h1	54.9	APRPPK(3254.4674)QPNVQDFQFFPPR+Incorrect Mono 1Da	769	snf2h	snf2h_hand	0.5	positional variants	35	3.1	adp	1.8
904.77	3	1.3	Z20170518-39_filtered	39.226	1	IDEAE(948.5029)SLNDEELEEK+Incorrect Mono 1Da	826	snf2h	snf2h_hand	30.4	ISYGTNK(1743.7687)GK+Incorrect Mono 1Da	945	snf2h	snf2h_slide	2.4	unique	36.2	3.1	adp	3.3
678.354	4	0.5	Z20170518-39_filtered	56.609	1	TPEEVIEYSAVFWE(854.4974)R+Incorrect Mono 1Da	891	snf2h	snf2h_sant	19.1	ALDTK(1835.8730)IGR+Incorrect Mono 1Da	926	snf2h	snf2h_slide	5.5	unique	35.9	3.1	adp	2
1105.14	5	1.7	Z20170518-37_filtered	62.132	1	GGPEGVAAQAVASAASAGPADAEMEE(2247.1701)IFDDASPGK+Incorrect Mono 1Da	62	snf2h	snf2h1	54.3	APRPPK(3254.4674)QPNVQDFQFFPPR+Incorrect Mono 1Da	769	snf2h	snf2h_hand	0.5	positional variants	35	3.1	adp	2
797.002	5	0.9	Z20170518-38_filtered	56.08	1	APRPPK(1714.7897)QPNVQDFQFFPPR	769	snf2h	snf2h_hand	39.4	ESE(2247.1701)ITDEDIDGILER	670	snf2h	snf2h_negc	30.4	positional variants	33.3	3	adp	3.6
1186.33	4	1.2	Z20170518-38_filtered	64.662	1	GGPEGVAAQAVASAASAGPAD(1467.7874)AEMEEIFDDASPGK+Incorrect Mono 1Da	57	snf2h	snf2h1	50	IAFTEWIEPPK(3254.4674)R+Incorrect Mono 1Da	737	snf2h	snf2h_hand	7.2	unique	33.1	3	adp	4
832.464	4	3.6	Z20170518-37_filtered	56.003	1	QTELFAHFIQPAAQK(872.5008)TPTSPLK+Incorrect Mono 1Da	114	snf2h	snf2h_auton	28.5	LFELLE(2434.3009)K+Incorrect Mono 1Da	788	snf2h	snf2h_hand	2.5	unique	35	3	adp	5.5
1103.52	4	-1	Z20170518-37_filtered	40.66	1	1048.4682-GSM(Oxidation)SSAAEPPPPPPPESAPSKPAASIASGGSNSSNK	1	snf2h	snf2h1	54.2	D(3343.5627)EM(Oxidation)LQM(Oxidation)IR	650	snf2h	snf2h_negc	12.7	unique	27.2	3	adp	4.8
673.848	4	0.9	Z20170518-39_filtered	51.601	1	TPEEVIE(836.4756)YSAVFWER+Incorrect Mono 1Da	884	snf2h	snf2h_sant	31.9	VSEPK(1835.8730)APK+Incorrect Mono 1Da	760	snf2h	snf2h_hand	4.5	unique	32.9	3	adp	3
797.002	5	0.9	Z20170518-38_filtered	56.08	1	APRPPK(1714.7897)QPNVQDFQFFPPR	769	snf2h	snf2h_hand	39.4	E(2247.1701)SEITDEDIDGILER	668	snf2h	snf2h_negc	29.2	positional variants	32.1	3	adp	3.6
901.402	4	1.5	Z20170518-38_filtered	54.837	1	NFTMDTESSVYNFEGE(1298.6408)DYR	719	snf2h	snf2h4	73.4	K(2284.9219)ANYAVDAYFR	741	snf2h	snf2h_hand	20.6	unique	27.9	3	adp	2
829.146	4	-5.1	Z20170518-38_filtered	57.945	1	E(1578.7678)SEITDEDIDGILER+Incorrect Mono 1Da	668	snf2h	snf2h_negc	38.9	LGFDK(1714.7897)ENVYDELR+Incorrect Mono 1Da	968	snf2h	snf2h_slide	20.1	unique	31.2	3	adp	1.8
1052.01	4	2.7	Z20170518-37_filtered	52.76	1	GGPE(914.5338)GVAAQAVASAASAGPADAEM(Oxidation)EEIFDDASPGK+Incorrect Mono 1Da	40	snf2h	snf2h1	50.5	TIGYK(3270.4623)VPR+Incorrect Mono 1Da	801	snf2h	snf2h_hand	3	unique	33.7	3	adp	3
731.566	5	-0.6	Z20170518-38_filtered	44.268	1	TEQE(1887.0214)EDEELLTESSK	151	snf2h	snf2h_auton	30.9	IKK(1747.7636)DEKQNLLSVGDYR	131	snf2h	snf2h_auton	30.6	positional variants	37.4	3	adp	2.8
731.566	5	-0.6	Z20170518-38_filtered	44.268	1	TEQE(1887.0214)EDEELLTESSK	151	snf2h	snf2h_auton	30.9	IKKDEK(1747.7636)QNLLSVGDYR	134	snf2h	snf2h_auton	30.6	positional variants	37.4	3	adp	5
1076.89	5	0.6	Z20170518-37_filtered	54.892	1	GGPEGVAAQAVASAASAGPADAEM(Oxidation)E(2089.9262)EIFDDASPGK+Incorrect Mono 1Da	61	snf2h	snf2h1	57	EIQEPDPTYEEK(3270.4623)MQTDR+Incorrect Mono 1Da	85	snf2h	snf2h_auton	14.8	positional variants	29.4	3	adp	2.4
1076.89	5	0.6	Z20170518-37_filtered	54.892	1	GGPEGVAAQAVASAASAGPADAEM(Oxidation)EE(2089.9262)IFDDASPGK+Incorrect Mono 1Da	62	snf2h	snf2h1	56.4	EIQEPDPTYEEK(3270.4623)MQTDR+Incorrect Mono 1Da	85	snf2h	snf2h_auton	14.8	positional variants	29.4	3	adp	2.1
877.953	4	1.4	Z20170518-38_filtered	60.078	1	DVLLPGE(1140.6192)WDVC(Carbamidomethyl)VTSYEMLIK+Incorrect Mono 1Da	281	snf2h	snf2h_reca1	36.7	YK(2348.1432)APFHQLR+Incorrect Mono 1Da	931	snf2h	snf2h_slide	7.6	unique	38	3	adp	1.5
784.632	4	-0.5	Z20170518-38_filtered	56.958	1	ESEITDE(1400.6970)DIDGILER+Incorrect Mono 1Da	674	snf2h	snf2h_negc	28.2	DIDILNSAGK(1714.7897)MDK+Incorrect Mono 1Da	442	snf2h	snf2h_reca2	11.8	positional variants	35.2	3	adp	1.6
1076.89	5	0.6	Z20170518-37_filtered	54.892	1	GGPEGVAAQAVASAASAGPADAE(2089.9262)M(Oxidation)EEIFDDASPGK+Incorrect Mono 1Da	59	snf2h	snf2h1	55.5	EIQEPDPTYEEK(3270.4623)MQTDR+Incorrect Mono 1Da	85	snf2h	snf2h_auton	14.8	positional variants	29.4	3	adp	2.9
574.111	5	0.8	Z20170518-37_filtered	43.394	1	RK(1115.5247)TVTAMDVVYALKR	79	h4	h4	34.9	DAVTYTE(1731.9818)HAK	74	h4	h4	30	unique	36.3	3	adp	17.8
869.039	5	1.7	Z20170518-38_filtered	54.732	1	Q(Gln->pyro-Glu)TELFAHFIQPAAQK(1903.8647)TPTSPLK+Incorrect Mono 1Da	114	snf2h	snf2h_auton	22.4	RTE(2417.2743)QEEDEELLTESSK+Incorrect Mono 1Da	149	snf2h	snf2h_auton	4.5	positional variants	41.9	2.9	adp	2.9
956.688	4	-0.8	Z20170518-38_filtered	51.952	1	E(2089.9262)SEITDEDIDGILER	668	snf2h	snf2h_negc	33.8	EIQEPDPTYEEK(1714.7897)MQTDR	85	snf2h	snf2h_auton	32.8	positional variants	34.3	2.9	adp	1.5
1045.26	4	1.2	Z20170518-38_filtered	42.515	1	831.4127-GSMSSAAEPPPPPPPESAPSKPAASIASGGSNSSNK	1	snf2h	snf2h1	73	EIAQD(3327.5677)FK	77	h3	h3	2.1	unique	23.5	2.9	adp	7
512.87	5	0	Z20170518-39_filtered	51.967	1	TLQTISLLGYMK(735.3340)HYR+Incorrect Mono 1Da	225	snf2h	snf2h_reca1	15.3	E(1804.9658)WYTR+Incorrect Mono 1Da	424	snf2h	snf2h_reca2	0.8	unique	41.7	2.9	adp	3
830.043	5	0.7	Z20170518-37_filtered	58.823	1	Q(Gln->pyro-Glu)TELFAHFIQPAAQK(1709.8889)TPTSPLK	114	snf2h	snf2h_auton	64.3	QTE(2417.2743)LFAHFIQPAAQK	102	snf2h	snf2h_auton	29.6	unique	29.5	2.9	adp	3
1008.16	3	1.4	Z20170518-39_filtered	48.427	1	LLTQGFTNWNK(1544.6743)R	849	snf2h	snf2h_sant	44.5	Q(Gln->pyro-Glu)DSINAYNE(1458.7732)PNSTK	549	snf2h	snf2h_reca2	25.4	unique	30.6	2.9	adp	2
732.778	5	0.7	Z20170518-38_filtered	61.889	1	TLQTISLLGYMK(1835.8730)HYR	225	snf2h	snf2h_reca1	36.3	TPEEVIE(1804.9658)YSAVFWER	884	snf2h	snf2h_sant	29.4	unique	34.2	2.9	adp	1.5
1278.59	4	-0.6	Z20170518-38_filtered	43.033	1	1747.7636-GSM(Oxidation)SSAAEPPPPPPPESAPSKPAASIASGGSNSSNK+Incorrect Mono 1Da	1	snf2h	snf2h1	51.5	TE(3343.5627)QEEDEELLTESSK+Incorrect Mono 1Da	149	snf2h	snf2h_auton	26.7	positional variants	29.5	2.9	adp	2.6
968.121	3	-0.4	Z20170518-38_filtered	45.386	1	E(1423.6772)IQEPDPTYEEK+Incorrect Mono 1Da	74	snf2h	snf2h1	15.8	FEDSPSYVK(1458.6515)WGK+Incorrect Mono 1Da	178	snf2h	snf2h2	10.8	unique	35.3	2.9	adp	4
868.955	4	0.6	Z20170518-38_filtered	52.294	1	QTELFAHFIQPAAQK(1018.4720)TPTSPLK+Incorrect Mono 1Da	114	snf2h	snf2h_auton	25	E(2434.3009)NVYDELR+Incorrect Mono 1Da	969	snf2h	snf2h_slide	4.5	unique	36.5	2.9	adp	5.5
793.162	4	0.3	Z20170518-38_filtered	41.125	1	NPELPNAAQAQK(1261.6415)EEQLK	816	snf2h	snf2h_hand	71.8	NPE(1888.9643)LPNAAQAQK	807	snf2h	snf2h_hand	35	unique	28	2.9	adp	3
951.456	3	-0.6	Z20170518-38_filtered	43.039	1	IDEAE(1088.5648)SLNDEELEEK+Incorrect Mono 1Da	826	snf2h	snf2h_hand	32.5	LSK(1743.7687)MGESSLR+Incorrect Mono 1Da	696	snf2h	snf2h_negc	9.4	unique	33.1	2.9	adp	3.3
1052.01	4	-3.3	Z20170518-37_filtered	53.817	1	GGPEGVAAQAVASAASAGPADAEM(Oxidation)E(914.5338)EIFDDASPGK+Incorrect Mono 1Da	61	snf2h	snf2h1	38.9	TIGYK(3270.4623)VPR+Incorrect Mono 1Da	801	snf2h	snf2h_hand	0.8	positional variants	36.6	2.9	adp	1.5
1048.01	4	0.8	Z20170518-37_filtered	58.639	1	GGPEGVAAQAVASAASAGPAD(914.5338)AEMEEIFDDASPGK+Incorrect Mono 1Da	57	snf2h	snf2h1	54.7	TIGYK(3254.4674)VPR+Incorrect Mono 1Da	801	snf2h	snf2h_hand	1.4	positional variants	30	2.9	adp	1.8
1048.01	4	0.8	Z20170518-37_filtered	58.639	1	GGPEGVAAQAVASAASAGPADAE(914.5338)MEEIFDDASPGK+Incorrect Mono 1Da	59	snf2h	snf2h1	54.7	TIGYK(3254.4674)VPR+Incorrect Mono 1Da	801	snf2h	snf2h_hand	1.4	positional variants	30	2.9	adp	2.5
1099.52	4	-0.1	Z20170518-37_filtered	51.472	1	GGPE(1104.5597)GVAAQAVASAASAGPADAEM(Oxidation)EEIFDDASPGK+Incorrect Mono 1Da	40	snf2h	snf2h1	51.7	LSK(3270.4623)M(Oxidation)GESSLR+Incorrect Mono 1Da	696	snf2h	snf2h_negc	5.5	unique	31.8	2.9	adp	2
1198.81	4	-0.1	Z20170518-37_filtered	63.797	1	GGPEGVAAQAVASAASAGPAD(1517.7474)AEMEEIFDDASPGK+Incorrect Mono 1Da	57	snf2h	snf2h1	39.2	DEK(3254.4674)QNLLSVGDYR+Incorrect Mono 1Da	134	snf2h	snf2h_auton	8.2	positional variants	32.6	2.9	adp	2.3
1146.17	3	-1.3	Z20170518-38_filtered	48.536	1	NFTMDTE(1131.5594)SSVYNFEGEDYR+Incorrect Mono 1Da	710	snf2h	snf2h4	25	TAEMNEK(2284.9219)LSK+Incorrect Mono 1Da	693	snf2h	snf2h_negc	6.9	unique	38.1	2.9	adp	4.8
985.877	5	0.2	Z20170518-37_filtered	46.786	1	1578.7678-GSMSSAAEPPPPPPPESAPSKPAASIASGGSNSSNK	1	snf2h	snf2h1	67.9	LGFDKENVYDE(3327.5677)LR	974	snf2h	snf2h_slide	5	unique	24.8	2.9	adp	6.5
1231.83	4	0.3	Z20170518-37_filtered	40.064	1	1561.7009-GSM(Oxidation)SSAAEPPPPPPPESAPSKPAASIASGGSNSSNK	1	snf2h	snf2h1	56.2	QD(3343.5627)SINAYNEPNSTK	542	snf2h	snf2h_reca2	22.3	unique	28.7	2.9	adp	7.5
757.604	5	1	Z20170518-38_filtered	57.18	1	FEYLLK(1261.6415)QTELFAHFIQPAAQK	99	snf2h	snf2h_auton	64.7	NPE(2503.3264)LPNAAQAQK	807	snf2h	snf2h_hand	31.7	unique	30.5	2.9	adp	3
804.254	5	1.6	Z20170518-37_filtered	58.017	1	K(1693.9443)TIGYKVPRNPELPNAAQAQK	796	snf2h	snf2h_hand	65.7	LFELLEKE(2304.2702)ILFYR	790	snf2h	snf2h_hand	24.2	unique	28.6	2.9	adp	23.9
749.872	4	-0.7	Z20170518-38_filtered	38.855	1	QK(1261.6415)EIQEPDPTYEEK+Incorrect Mono 1Da	73	snf2h	snf2h1	24.8	NPE(1714.8050)LPNAAQAQK+Incorrect Mono 1Da	807	snf2h	snf2h_hand	22.6	unique	36.4	2.9	adp	5
1019.24	4	-1.2	Z20170518-37_filtered	52.504	1	GGPEGVAAQAVASAASAGPADAEM(Oxidation)EE(783.4491)IFDDASPGK+Incorrect Mono 1Da	62	snf2h	snf2h1	54.9	IK(3270.4623)ADVEK+Incorrect Mono 1Da	399	snf2h	snf2h_reca1	-1.9	positional variants	41.3	2.9	adp	1.2
660.859	4	0.5	Z20170518-38_filtered	64.282	1	LFELLEK(926.4458)EILFYR+Incorrect Mono 1Da	789	snf2h	snf2h_hand	22.9	D(1693.9443)DIENIAR+Incorrect Mono 1Da	865	snf2h	snf2h_sant	14.2	unique	37.9	2.9	adp	2.3
1140.81	4	0	Z20170518-38_filtered	49.46	1	1213.6489-GSMSSAAEPPPPPPPESAPSKPAASIASGGSNSSNK	1	snf2h	snf2h1	51.8	C(Carbamidomethyl)NTLITLIE(3327.5677)R	1011	snf2h	snf2h_slide	7.2	unique	29.6	2.9	adp	10
653.509	5	0.9	Z20170518-38_filtered	42.534	1	NFTM(Oxidation)DTESSVYNFE(942.5763)GEDYR+Incorrect Mono 1Da	717	snf2h	snf2h4	19.4	APK(2300.9168)APRPPK+Incorrect Mono 1Da	763	snf2h	snf2h_hand	-2.3	unique	39.6	2.9	adp	3.3
731.566	5	-0.6	Z20170518-38_filtered	44.268	1	IKK(1747.7636)DEKQNLLSVGDYR	131	snf2h	snf2h_auton	30.6	TEQEE(1887.0214)DEELLTESSK	152	snf2h	snf2h_auton	29.4	positional variants	35.9	2.8	adp	4.5
1019.24	4	-1.2	Z20170518-37_filtered	52.504	1	GGPEGVAAQAVASAASAGPAD(783.4491)AEM(Oxidation)EEIFDDASPGK+Incorrect Mono 1Da	57	snf2h	snf2h1	52.4	IK(3270.4623)ADVEK+Incorrect Mono 1Da	399	snf2h	snf2h_reca1	-1.9	positional variants	41.3	2.8	adp	1.2
731.566	5	-0.6	Z20170518-38_filtered	44.268	1	IKKDEK(1747.7636)QNLLSVGDYR	134	snf2h	snf2h_auton	30.6	TEQEE(1887.0214)DEELLTESSK	152	snf2h	snf2h_auton	29.4	positional variants	35.9	2.8	adp	1.2
886.248	5	-0.3	Z20170518-37_filtered	58.227	1	FEYLLK(1903.8647)QTELFAHFIQPAAQK+Incorrect Mono 1Da	99	snf2h	snf2h_auton	33.5	RTE(2503.3264)QEEDEELLTESSK+Incorrect Mono 1Da	149	snf2h	snf2h_auton	20.9	positional variants	37.2	2.8	adp	1.3
886.248	5	-0.3	Z20170518-37_filtered	58.227	1	FEYLLK(1903.8647)QTELFAHFIQPAAQK+Incorrect Mono 1Da	99	snf2h	snf2h_auton	33.5	RTEQE(2503.3264)EDEELLTESSK+Incorrect Mono 1Da	151	snf2h	snf2h_auton	20.9	positional variants	37.2	2.8	adp	1.8
886.248	5	-0.3	Z20170518-37_filtered	58.227	1	FEYLLK(1903.8647)QTELFAHFIQPAAQK+Incorrect Mono 1Da	99	snf2h	snf2h_auton	33.5	RTEQEE(2503.3264)DEELLTESSK+Incorrect Mono 1Da	152	snf2h	snf2h_auton	20.9	positional variants	37.2	2.8	adp	1.1
717.675	6	0.6	Z20170518-37_filtered	52.767	1	NFTM(Oxidation)DTESSVYNFEGEDYRE(1723.9410)K	723	snf2h	snf2h4	49.9	QK(2558.0544)IAFTEWIEPPKR	726	snf2h	snf2h4	23.8	unique	31.1	2.8	adp	2.2
788.381	3	-0.3	Z20170518-40_filtered	33.83	1	Q(Gln->pyro-Glu)DSINAYNE(798.4348)PNSTK+Incorrect Mono 1Da	549	snf2h	snf2h_reca2	25.2	LK(1544.6743)EQGSR+Incorrect Mono 1Da	498	snf2h	snf2h_reca2	2.9	unique	32.7	2.8	adp	3
1056.5	4	-0.9	Z20170518-38_filtered	56.65	1	GGPEGVAAQAVASAASAGPAD(948.5029)AEMEEIFDDASPGK+Incorrect Mono 1Da	57	snf2h	snf2h1	59.6	ISYGTNK(3254.4674)GK+Incorrect Mono 1Da	945	snf2h	snf2h_slide	-1.7	unique	38.2	2.8	adp	3.2
1054.02	6	0.5	Z20170518-37_filtered	78.742	1	VGAGAPVYLAAVLEYLTAE(3403.5060)ILELAGNAAR	61	h2a	h2a_ap	43.5	K(2896.5698)C(Carbamidomethyl)C(Carbamidomethyl)NHPYLFDGAEPGPPYTTDM(Oxidation)HLVTNSGK	457	snf2h	snf2h_reca2	30.8	unique	37.6	2.8	adp	5.5
755.618	4	-0.4	Z20170518-38_filtered	51.884	1	ESE(1285.6449)ITDEDIDGILER	670	snf2h	snf2h_negc	38.2	SVC(Carbamidomethyl)LIGDK(1714.7897)EQR	266	snf2h	snf2h_reca1	24.8	unique	30.1	2.8	adp	1.3
1096.02	4	-0.1	Z20170518-37_filtered	42.492	1	1018.4720-GSM(Oxidation)SSAAEPPPPPPPESAPSKPAASIASGGSNSSNK	1	snf2h	snf2h1	60.8	ENVYD(3343.5627)ELR	973	snf2h	snf2h_slide	1	positional variants	29.5	2.8	adp	3.5
692.553	5	-0.5	Z20170518-38_filtered	67.368	1	TPEEVIEYSAVFWE(1602.8415)R+Incorrect Mono 1Da	891	snf2h	snf2h_sant	15.8	FLIC(Carbamidomethyl)MLHK(1835.8730)LGFDK+Incorrect Mono 1Da	963	snf2h	snf2h_slide	6.5	unique	34.7	2.8	adp	3
731.566	5	-0.6	Z20170518-38_filtered	44.268	1	TEQE(1887.0214)EDEELLTESSK	151	snf2h	snf2h_auton	30.9	IK(1747.7636)KDEKQNLLSVGDYR	130	snf2h	snf2h_auton	29.1	positional variants	35.9	2.8	adp	2.1
880.804	3	0.1	Z20170518-39_filtered	49.757	1	ISGLIYE(1458.7732)ETR+Incorrect Mono 1Da	52	h4	h4	5.2	LLTQGFTNWNK(1161.6030)R+Incorrect Mono 1Da	849	snf2h	snf2h_sant	4.7	unique	39.1	2.8	adp	3.5
642.346	4	0	Z20170518-38_filtered	56.533	1	IAFTE(1079.5553)WIEPPKR	731	snf2h	snf2h4	34.2	FDWFLK(1467.7874)SR	992	snf2h	snf2h_slide	30.1	unique	34.8	2.8	adp	4
1153.25	3	1.9	Z20170518-38_filtered	64.185	1	LFELLEK(1743.7687)EILFYR+Incorrect Mono 1Da	789	snf2h	snf2h_hand	25	IDE(1693.9443)AESLNDEELEEK+Incorrect Mono 1Da	824	snf2h	snf2h_hand	21.1	positional variants	32.7	2.8	adp	2.5
702.167	5	0	Z20170518-38_filtered	49.957	1	QTELFAHFIQPAAQK(1052.4815)TPTSPLK+Incorrect Mono 1Da	114	snf2h	snf2h_auton	37.7	FE(2434.3009)DSPSYVK+Incorrect Mono 1Da	171	snf2h	snf2h2	8.2	unique	31.1	2.8	adp	2.5
843.425	3	-0.8	Z20170518-39_filtered	43.972	1	QK(793.4374)EIQEPDPTYEEK+Incorrect Mono 1Da	73	snf2h	snf2h1	48.8	FE(1714.8050)YLLK+Incorrect Mono 1Da	95	snf2h	snf2h_auton	4.5	unique	26.2	2.7	adp	7
1064.51	4	0.9	Z20170518-37_filtered	44.016	1	892.4443-GSM(Oxidation)SSAAEPPPPPPPESAPSKPAASIASGGSNSSNK	1	snf2h	snf2h1	67.5	D(3343.5627)FNQFIK	851	snf2h	snf2h_sant	10.7	unique	26.8	2.7	adp	5
816.41	3	0.2	Z20170518-39_filtered	36.919	1	Q(Gln->pyro-Glu)DSINAYNE(883.5240)PNSTK	549	snf2h	snf2h_reca2	54	IGQTK(1544.6743)TVR	602	snf2h	snf2h_reca2	20.9	unique	27.8	2.7	adp	4.5
561.103	5	0.7	Z20170518-38_filtered	55.588	1	IAFTE(1314.6788)WIEPPKR	731	snf2h	snf2h4	37.7	IGK(1467.7874)DEMLQMIR	649	snf2h	snf2h_negc	28.6	unique	34	2.7	adp	3
985.662	5	-0.2	Z20170518-37_filtered	40.218	1	1561.7009-GSM(Oxidation)SSAAEPPPPPPPESAPSKPAASIASGGSNSSNK	1	snf2h	snf2h1	72.5	QDSINAYNE(3343.5627)PNSTK	549	snf2h	snf2h_reca2	12.4	unique	24.1	2.7	adp	8.5
549.469	6	1.5	Z20170518-38_filtered	56.164	1	TLQTISLLGYMK(1467.7874)HYR	225	snf2h	snf2h_reca1	38.9	IAFTE(1804.9658)WIEPPKR	731	snf2h	snf2h4	27.7	unique	32.8	2.7	adp	5.5
596.68	3	0	Z20170518-39_filtered	41.622	1	K(872.5008)SAPATGGVK	27	h3	h3_tail	28.7	LFELLE(896.5080)K	788	snf2h	snf2h_hand	28.6	unique	31.8	2.7	adp	2
1050.9	5	0.1	Z20170518-37_filtered	43.392	1	1903.8647-GSMSSAAEPPPPPPPESAPSKPAASIASGGSNSSNK	1	snf2h	snf2h1	47.9	RTEQEEDEELLTE(3327.5677)SSK	159	snf2h	snf2h_auton	13.8	unique	23.4	2.7	adp	1.3
701.605	4	1.8	Z20170518-38_filtered	53.159	1	TPEEVIE(948.5029)YSAVFWER	884	snf2h	snf2h_sant	37.4	ISYGTNK(1835.8730)GK	945	snf2h	snf2h_slide	22.9	unique	30.6	2.7	adp	2.5
569.32	3	-0.2	Z20170518-39_filtered	36.347	1	YLVID(589.3588)EAHR+Incorrect Mono 1Da	310	snf2h	snf2h_reca1	11.9	SVFK(1096.5665)K+Incorrect Mono 1Da	300	snf2h	snf2h_reca1	-2.6	unique	40.9	2.7	adp	3
1048.16	3	0.8	Z20170518-38_filtered	52.56	1	Q(Gln->pyro-Glu)DSINAYNE(1578.7678)PNSTK	549	snf2h	snf2h_reca2	27.6	LGFDK(1544.6743)ENVYDELR	968	snf2h	snf2h_slide	27.1	unique	35.4	2.7	adp	2
914.655	4	-0.5	Z20170518-38_filtered	53.099	1	NFTM(Oxidation)DTESSVYNFE(1334.6619)GEDYR+Incorrect Mono 1Da	717	snf2h	snf2h4	21.5	DFNQFIK(2300.9168)ANEK+Incorrect Mono 1Da	857	snf2h	snf2h_sant	14.2	unique	34.4	2.7	adp	2
762.877	4	-0.1	Z20170518-38_filtered	58.055	1	E(1314.6788)SEITDEDIDGILER	668	snf2h	snf2h_negc	77.8	IGK(1714.7897)DEMLQMIR	649	snf2h	snf2h_negc	14.8	unique	18.7	2.7	adp	3
1099.52	4	0.2	Z20170518-37_filtered	43.198	1	1032.4732-GSM(Oxidation)SSAAEPPPPPPPESAPSKPAASIASGGSNSSNK	1	snf2h	snf2h1	54.5	DE(3343.5627)MLQM(Oxidation)IR	651	snf2h	snf2h_negc	12.3	positional variants	27.1	2.7	adp	1.8
1062.74	4	-0.5	Z20170518-38_filtered	39.155	1	885.3439-GSM(Oxidation)SSAAEPPPPPPPESAPSKPAASIASGGSNSSNK	1	snf2h	snf2h1	60.7	NYE(3343.5627)YC(Carbamidomethyl)R	527	snf2h	snf2h_reca2	0.9	unique	25.2	2.7	adp	7
689.718	5	0	Z20170518-38_filtered	49.96	1	NFTMDTESSVYNFEGE(1140.6192)DYR	719	snf2h	snf2h4	75	YK(2284.9219)APFHQLR	931	snf2h	snf2h_slide	14.4	unique	21.8	2.7	adp	2
676.84	4	0.6	Z20170518-39_filtered	42.589	1	FEDSPSYVK(1261.6415)WGK	178	snf2h	snf2h2	38	NPE(1423.6772)LPNAAQAQK	807	snf2h	snf2h_hand	26.6	unique	32	2.7	adp	3
599.909	5	1.2	Z20170518-38_filtered	55.413	1	TPEEVIEYSAVFWE(1140.6192)R	891	snf2h	snf2h_sant	60.2	YK(1835.8730)APFHQLR	931	snf2h	snf2h_slide	20	unique	24.8	2.7	adp	2
1007.7	5	3.2	Z20170518-37_filtered	57.514	1	GGPEGVAAQAVASAASAGPADAE(1743.9883)M(Oxidation)EEIFDDASPGK+Incorrect Mono 1Da	59	snf2h	snf2h1	46.4	LLLPGELAK(3270.4623)HAVSEGTK+Incorrect Mono 1Da	105	h2b	h2b_ap	3.3	positional variants	28.8	2.6	adp	1.4
1046.24	4	0.7	Z20170518-37_filtered	36.394	1	819.3433-GSM(Oxidation)SSAAEPPPPPPPESAPSKPAASIASGGSNSSNK	1	snf2h	snf2h1	56.7	TAE(3343.5627)M(Oxidation)NEK	689	snf2h	snf2h_negc	2.5	unique	24.4	2.6	adp	11.2
694.833	4	0.1	Z20170518-39_filtered	45.06	1	E(1298.6408)IQEPDPTYEEK	74	snf2h	snf2h1	31.7	K(1458.6515)ANYAVDAYFR	741	snf2h	snf2h_hand	30.1	unique	34	2.6	adp	3
1006.73	4	0.7	Z20170518-38_filtered	38.798	1	661.3184-GSM(Oxidation)SSAAEPPPPPPPESAPSKPAASIASGGSNSSNK	1	snf2h	snf2h1	58.3	D(3343.5627)YQVR	184	snf2h	snf2h_reca1	1.3	unique	25.6	2.6	adp	5
658.092	4	0.5	Z20170518-39_filtered	55.661	1	K(1311.6863)ANYAVDAYFR	741	snf2h	snf2h_hand	37.5	IAFTEWIE(1298.6408)PPK	734	snf2h	snf2h4	25.9	unique	28.1	2.6	adp	7.5
1099.58	3	0.3	Z20170518-38_filtered	71.39	1	LFELLEK(1583.7521)EILFYR	789	snf2h	snf2h_hand	34.8	Q(Gln->pyro-Glu)PNVQD(1693.9443)FQFFPPR	775	snf2h	snf2h_hand	24.2	unique	26.4	2.6	adp	5
887.437	3	-0.9	Z20170518-38_filtered	38.095	1	IDE(896.5080)AESLNDEELEEK+Incorrect Mono 1Da	824	snf2h	snf2h_hand	34.5	K(1743.7687)SAPATGGVK+Incorrect Mono 1Da	27	h3	h3_tail	13.3	unique	29.5	2.6	adp	4
1128.05	4	-1	Z20170518-37_filtered	44.746	1	1145.5829-GSM(Oxidation)SSAAEPPPPPPPESAPSKPAASIASGGSNSSNK+Incorrect Mono 1Da	1	snf2h	snf2h1	85	QNLLSVGD(3343.5627)YR+Incorrect Mono 1Da	142	snf2h	snf2h_auton	12.4	unique	21	2.6	adp	5
812.737	3	5.9	Z20170518-39_filtered	36.708	1	TEQEEDE(668.3970)ELLTESSK+Incorrect Mono 1Da	154	snf2h	snf2h_auton	26.1	GLGK(1747.7636)GGAK+Incorrect Mono 1Da	12	h4	h4_tail	7.2	positional variants	28.8	2.6	adp	1.3
958.717	4	0.5	Z20170518-37_filtered	38.107	1	469.2649-GSM(Oxidation)SSAAEPPPPPPPESAPSKPAASIASGGSNSSNK	1	snf2h	snf2h1	64.3	E(3343.5627)ALR	752	snf2h	snf2h_hand	0.8	unique	21.5	2.6	adp	10
843.745	3	0.2	Z20170518-39_filtered	33.806	1	QDSINAYNE(948.5029)PNSTK	549	snf2h	snf2h_reca2	35.9	ISYGTNK(1561.7009)GK	945	snf2h	snf2h_slide	23.2	unique	25.1	2.6	adp	3
678.103	4	0.4	Z20170518-39_filtered	55.473	1	TPEEVIE(854.4974)YSAVFWER	884	snf2h	snf2h_sant	55.4	ALDTK(1835.8730)IGR	926	snf2h	snf2h_slide	18.6	unique	21.8	2.6	adp	4
1118.81	4	0.6	Z20170518-37_filtered	42.753	1	1109.6193-GSM(Oxidation)SSAAEPPPPPPPESAPSKPAASIASGGSNSSNK	1	snf2h	snf2h1	43.9	LD(3343.5627)SIVIQQGR	630	snf2h	snf2h_reca2	12.2	unique	28.8	2.6	adp	5
731.766	5	-1.4	Z20170518-38_filtered	44.179	1	TEQEE(1887.0214)DEELLTESSK+Incorrect Mono 1Da	152	snf2h	snf2h_auton	29.6	IK(1747.7636)KDEKQNLLSVGDYR+Incorrect Mono 1Da	130	snf2h	snf2h_auton	19.8	positional variants	33.4	2.6	adp	3.3
572.074	4	-0.1	Z20170518-38_filtered	39.853	1	K(1369.7500)SAPATGGVK	27	h3	h3_tail	28.9	RC(Carbamidomethyl)NTLITLIE(896.5080)R	1011	snf2h	snf2h_slide	22.2	unique	28.8	2.6	adp	5
581.487	5	0.3	Z20170518-38_filtered	42.599	1	ID(1140.6192)EAESLNDEELEEK	823	snf2h	snf2h_hand	57.8	YK(1743.7687)APFHQLR	931	snf2h	snf2h_slide	14.8	positional variants	22.9	2.6	adp	1.3
581.487	5	0.3	Z20170518-38_filtered	42.599	1	IDE(1140.6192)AESLNDEELEEK	824	snf2h	snf2h_hand	57.8	YK(1743.7687)APFHQLR	931	snf2h	snf2h_slide	14.8	positional variants	22.9	2.6	adp	2.3
1033	4	-0.6	Z20170518-38_filtered	58.852	1	GGPEGVAAQAVASAASAGPAD(854.4974)AEMEEIFDDASPGK+Incorrect Mono 1Da	57	snf2h	snf2h1	55.5	ALDTK(3254.4674)IGR+Incorrect Mono 1Da	926	snf2h	snf2h_slide	0.8	positional variants	29.5	2.6	adp	1.3
1019.89	5	-1.3	Z20170518-37_filtered	60.355	1	GGPEGVAAQAVASAASAGPADAEM(Oxidation)E(1804.9658)EIFDDASPGK+Incorrect Mono 1Da	61	snf2h	snf2h1	33.8	TLQTISLLGYMK(3270.4623)HYR+Incorrect Mono 1Da	225	snf2h	snf2h_reca1	2.5	positional variants	36.7	2.6	adp	1.5
657.696	3	-0.2	Z20170518-39_filtered	58.571	1	FDWFLK(872.5008)SR	992	snf2h	snf2h_slide	28.6	LFELLE(1079.5553)K	788	snf2h	snf2h_hand	23.4	unique	30.4	2.5	adp	2
631.153	5	0.3	Z20170518-38_filtered	49.794	1	QTELFAHFIQPAAQK(697.4123)TPTSPLK+Incorrect Mono 1Da	114	snf2h	snf2h_auton	42.5	LSE(2434.3009)IVR+Incorrect Mono 1Da	324	snf2h	snf2h_reca1	0.8	unique	29.6	2.5	adp	3
706.599	4	0	Z20170518-38_filtered	49.976	1	ESEITD(1088.5648)EDIDGILER+Incorrect Mono 1Da	673	snf2h	snf2h_negc	32.4	LSK(1714.7897)MGESSLR+Incorrect Mono 1Da	696	snf2h	snf2h_negc	15.2	unique	30.7	2.5	adp	2
1019.89	5	-1.3	Z20170518-37_filtered	60.355	1	GGPEGVAAQAVASAASAGPADAEM(Oxidation)EE(1804.9658)IFDDASPGK+Incorrect Mono 1Da	62	snf2h	snf2h1	33.1	TLQTISLLGYMK(3270.4623)HYR+Incorrect Mono 1Da	225	snf2h	snf2h_reca1	2.5	positional variants	36.7	2.5	adp	1.2
433.22	5	1.3	Z20170518-38_filtered	38.144	1	YK(1002.4328)APFHQLR	931	snf2h	snf2h_slide	30.9	E(1140.6192)NMELEEK	1013	snf2h	snf2h_slide	21.9	unique	26.6	2.5	adp	4
877.449	4	-0.2	Z20170518-37_filtered	50.366	1	LLLPGELAK(1743.7687)HAVSEGTK	105	h2b	h2b_ap	36.4	IDEAE(1743.9883)SLNDEELEEK	826	snf2h	snf2h_hand	32.4	positional variants	34	2.5	adp	2.8
968.807	3	-0.5	Z20170518-38_filtered	43.125	1	IDEAESLNDEELE(1140.6192)EK+Incorrect Mono 1Da	834	snf2h	snf2h_hand	11.9	YK(1743.7687)APFHQLR+Incorrect Mono 1Da	931	snf2h	snf2h_slide	1.1	positional variants	39	2.5	adp	2.3
602.029	4	0.8	Z20170518-39_filtered	36.149	1	E(927.4232)IQEPDPTYEEK	74	snf2h	snf2h1	47.4	K(1458.6515)MDGAPDGR	1038	snf2h	snf2h5	24.4	unique	28.4	2.5	adp	3
756.553	5	-1.4	Z20170518-38_filtered	44.451	1	RTEQEEDEELLTESSK(1052.4815)ATNVC(Carbamidomethyl)TR+Incorrect Mono 1Da	162	snf2h	snf2h2	40.2	FE(2706.2403)DSPSYVK+Incorrect Mono 1Da	171	snf2h	snf2h2	8	unique	18.7	2.5	adp	3.5
821.219	5	1.6	Z20170518-37_filtered	59.988	1	APRPPK(1835.8730)QPNVQDFQFFPPR	769	snf2h	snf2h_hand	40.6	TPE(2247.1701)EVIEYSAVFWER	880	snf2h	snf2h_sant	27.2	positional variants	30.5	2.5	adp	1.2
762.788	5	1.1	Z20170518-38_filtered	42.388	1	IKK(1903.8647)DEKQNLLSVGDYR	131	snf2h	snf2h_auton	36.9	RTEQEED(1887.0214)EELLTESSK	153	snf2h	snf2h_auton	23.9	positional variants	30.8	2.5	adp	2
948.646	5	0.5	Z20170518-37_filtered	41.96	1	1376.6183-GSM(Oxidation)SSAAEPPPPPPPESAPSKPAASIASGGSNSSNK	1	snf2h	snf2h1	79.2	STLHNWM(Oxidation)SE(3343.5627)FK	249	snf2h	snf2h_reca1	0	unique	17.9	2.5	adp	5
633.324	4	1.1	Z20170518-39_filtered	45.544	1	LLTQGFTNWNK(1052.4815)R	849	snf2h	snf2h_sant	40.5	FE(1458.7732)DSPSYVK	171	snf2h	snf2h2	19.9	positional variants	27.2	2.5	adp	1.5
813.415	5	0.3	Z20170518-37_filtered	58.805	1	QTELFAHFIQPAAQK(1609.7269)TPTSPLK	114	snf2h	snf2h_auton	27.1	VLDILED(2434.3009)YC(Carbamidomethyl)M(Oxidation)WR	519	snf2h	snf2h_reca2	22.4	positional variants	29.9	2.5	adp	2.5
898.153	4	1.6	Z20170518-38_filtered	51.509	1	NFTMDTESSVYNFE(1285.6449)GEDYR	717	snf2h	snf2h4	42.4	SVC(Carbamidomethyl)LIGDK(2284.9219)EQR	266	snf2h	snf2h_reca1	19.1	unique	26.6	2.5	adp	1.3
951.322	6	0	Z20170518-37_filtered	70.213	1	FQSSAVM(Oxidation)ALQEASEAYLVALFED(2247.1701)TNLAAIHAK+Incorrect Mono 1Da	106	h3	h3	45.8	APRPPK(3435.7021)QPNVQDFQFFPPR+Incorrect Mono 1Da	769	snf2h	snf2h_hand	18.3	positional variants	29	2.4	adp	1.3
951.322	6	0	Z20170518-37_filtered	70.213	1	FQSSAVM(Oxidation)ALQEASEAYLVALFE(2247.1701)DTNLAAIHAK+Incorrect Mono 1Da	105	h3	h3	45.8	APRPPK(3435.7021)QPNVQDFQFFPPR+Incorrect Mono 1Da	769	snf2h	snf2h_hand	18.3	positional variants	29	2.4	adp	2.3
1031.87	5	1.6	Z20170518-37_filtered	50.526	1	K(1747.7636)C(Carbamidomethyl)C(Carbamidomethyl)NHPYLFDGAEPGPPYTTDMHLVTNSGK+Incorrect Mono 1Da	457	snf2h	snf2h_reca2	35.4	TEQE(3387.5111)EDEELLTESSK+Incorrect Mono 1Da	151	snf2h	snf2h_auton	26.1	positional variants	34.4	2.4	adp	1.8
983.706	5	0.4	Z20170518-37_filtered	71.13	1	FQSSAVM(Oxidation)ALQEASEAYLVALFE(1458.7732)DTNLAAIHAK+Incorrect Mono 1Da	105	h3	h3	47	LLTQGFTNWNK(3435.7021)R+Incorrect Mono 1Da	849	snf2h	snf2h_sant	1.2	unique	32	2.4	adp	2
648.062	4	-0.4	Z20170518-38_filtered	46.221	1	FE(1516.7245)DSPSYVK+Incorrect Mono 1Da	171	snf2h	snf2h2	14.8	STLHNWMSEFK(1052.4815)R+Incorrect Mono 1Da	251	snf2h	snf2h_reca1	10.4	unique	31.6	2.4	adp	2
1059.51	4	1.5	Z20170518-37_filtered	41.999	1	872.4426-GSM(Oxidation)SSAAEPPPPPPPESAPSKPAASIASGGSNSSNK	1	snf2h	snf2h1	66.8	SVC(Carbamidomethyl)LIGD(3343.5627)K	265	snf2h	snf2h_reca1	0.3	unique	22.4	2.4	adp	4.5
1053.14	3	-0.1	Z20170518-38_filtered	44.852	1	NFTM(Oxidation)DTESSVYNFEGED(836.4756)YR+Incorrect Mono 1Da	720	snf2h	snf2h4	12.7	VSEPK(2300.9168)APK+Incorrect Mono 1Da	760	snf2h	snf2h_hand	2.5	positional variants	29.8	2.4	adp	2.5
756.918	4	0.6	Z20170518-38_filtered	45.586	1	LLLPGELAK(1261.6415)HAVSEGTK	105	h2b	h2b_ap	40.1	NPE(1743.9883)LPNAAQAQK	807	snf2h	snf2h_hand	27	unique	32.4	2.4	adp	3
748.084	4	1.5	Z20170518-38_filtered	38.081	1	TEQEEDE(1221.5262)ELLTESSK+Incorrect Mono 1Da	154	snf2h	snf2h_auton	24.4	GK(1747.7636)NYTEEEDR+Incorrect Mono 1Da	947	snf2h	snf2h_slide	18.3	positional variants	34.3	2.4	adp	1.8
735.364	4	0.2	Z20170518-38_filtered	47.04	1	IDEAE(1175.6485)SLNDEELEEK	826	snf2h	snf2h_hand	38.1	IYVGLSK(1743.7687)MQR	420	snf2h	snf2h_reca2	29.8	unique	29.8	2.4	adp	1.2
763.383	4	0.3	Z20170518-38_filtered	34.925	1	IDEAE(1286.7208)SLNDEELEEK+Incorrect Mono 1Da	826	snf2h	snf2h_hand	29.2	SAPATGGVKK(1743.7687)PHR+Incorrect Mono 1Da	37	h3	h3_tail	12.7	positional variants	29.3	2.4	adp	2.9
968.145	3	1.8	Z20170518-39_filtered	58.555	1	Q(Gln->pyro-Glu)PNVQD(1298.6408)FQFFPPR+Incorrect Mono 1Da	775	snf2h	snf2h_hand	25.6	K(1583.7521)ANYAVDAYFR+Incorrect Mono 1Da	741	snf2h	snf2h_hand	23.3	unique	33.5	2.4	adp	3
462.44	5	5.9	Z20170518-39_filtered	32.936	1	LDGQTPHDE(1140.6192)R	539	snf2h	snf2h_reca2	48.4	YK(1148.5210)APFHQLR	931	snf2h	snf2h_slide	24.6	unique	29.4	2.4	adp	2.5
944.701	4	-0.4	Z20170518-38_filtered	36.381	1	413.2023-GSM(Oxidation)SSAAEPPPPPPPESAPSKPAASIASGGSNSSNK	1	snf2h	snf2h1	64.3	GE(3343.5627)AR	910	snf2h	snf2h_slide	-2.3	protein variants	22.8	2.4	adp	8.5
814.653	4	0.8	Z20170518-38_filtered	61.694	1	DIDILNSAGK(1835.8730)MDK	442	snf2h	snf2h_reca2	36.9	TPEEVIE(1400.6970)YSAVFWER	884	snf2h	snf2h_sant	29.6	unique	30.4	2.4	adp	1.5
798.873	4	-1.6	Z20170518-38_filtered	41.276	1	QK(1458.6515)EIQEPDPTYEEK	73	snf2h	snf2h1	57.2	EIQEPDPTYE(1714.8050)EK	83	snf2h	snf2h1	25.3	positional variants	22.8	2.4	adp	3.6
582.903	5	0.6	Z20170518-38_filtered	51.374	1	FEDSPSYVK(1467.7874)WGK	178	snf2h	snf2h2	29.6	IAFTE(1423.6772)WIEPPKR	731	snf2h	snf2h4	23.3	unique	29.9	2.4	adp	2
798.873	4	-1.6	Z20170518-38_filtered	41.276	1	QK(1458.6515)EIQEPDPTYEEK	73	snf2h	snf2h1	57.2	EIQEPDPTYEE(1714.8050)K	84	snf2h	snf2h_auton	22.2	positional variants	22.8	2.4	adp	3
1048.01	4	-4.2	Z20170518-37_filtered	59.31	1	GGPEGVAAQAVASAASAGPADAEMEE(914.5338)IFDDASPGK+Incorrect Mono 1Da	62	snf2h	snf2h1	50.9	TIGYK(3254.4674)VPR+Incorrect Mono 1Da	801	snf2h	snf2h_hand	-2.3	positional variants	39.7	2.4	adp	1.2
797.005	5	0.5	Z20170518-37_filtered	59.73	1	FEYLLK(1458.6515)QTELFAHFIQPAAQK	99	snf2h	snf2h_auton	59.4	EIQE(2503.3264)PDPTYEEK	77	snf2h	snf2h1	23.4	positional variants	27.4	2.4	adp	2.5
803.568	5	-0.3	Z20170518-38_filtered	44.045	1	EIQEPDPTYEEK(1903.8647)MQTDR+Incorrect Mono 1Da	85	snf2h	snf2h_auton	25.3	RTEQEE(2089.9262)DEELLTESSK+Incorrect Mono 1Da	152	snf2h	snf2h_auton	11.8	positional variants	32.3	2.4	adp	1.4
524.481	5	0.6	Z20170518-38_filtered	35.808	1	TPTSPLK(1052.4815)MKPGRPR	121	snf2h	snf2h_auton	27.9	FED(1546.8766)SPSYVK	172	snf2h	snf2h2	24.2	unique	31.5	2.4	adp	2.3
507.786	4	-0.1	Z20170518-39_filtered	43.823	1	YLVIDE(912.5393)AHR	311	snf2h	snf2h_reca1	31.4	SK(1096.5665)LSEIVR	321	snf2h	snf2h_reca1	28	positional variants	32.5	2.4	adp	5
457.24	6	0.6	Z20170518-38_filtered	45.711	1	LGFDKENVYDE(1140.6192)LR	974	snf2h	snf2h_slide	36.6	YK(1578.7678)APFHQLR	931	snf2h	snf2h_slide	31.8	unique	33.6	2.4	adp	6
441.009	4	-0.2	Z20170518-39_filtered	41.567	1	C(Carbamidomethyl)NTLITLIE(527.3431)R+Incorrect Mono 1Da	1011	snf2h	snf2h_slide	5.5	K(1213.6489)AVTK+Incorrect Mono 1Da	13	h2b	h2b_tail	2.9	unique	34.9	2.4	adp	3
509.915	3	-0.2	Z20170518-40_filtered	23.272	1	K(690.3085)GNYAER	36	h2a	h2a	33.1	GNYAE(818.4035)R	41	h2a	h2a	27.1	unique	28.8	2.4	adp	5
695.186	5	-0.7	Z20170518-37_filtered	83.25	1	VGAGAPVYLAAVLEYLTAE(555.3129)ILELAGNAAR+Incorrect Mono 1Da	61	h2a	h2a_ap	27.2	GK(2896.5698)QGGK+Incorrect Mono 1Da	5	h2a	h2a_ntail	-1.3	unique	27.9	2.4	adp	1.5
865.188	4	-1.4	Z20170518-38_filtered	64.308	1	IDEAE(1693.9443)SLNDEELEEK+Incorrect Mono 1Da	826	snf2h	snf2h_hand	25.2	LFELLEK(1743.7687)EILFYR+Incorrect Mono 1Da	789	snf2h	snf2h_hand	21.7	positional variants	31.7	2.4	adp	2.5
781.03	3	1.1	Z20170518-39_filtered	36.596	1	SVC(Carbamidomethyl)LIGDK(1036.4098)EQR	266	snf2h	snf2h_reca1	43.2	NYTE(1285.6449)EEDR	951	snf2h	snf2h_slide	19.1	unique	22.6	2.3	adp	2
941.435	4	1.4	Z20170518-38_filtered	54.635	1	NFTMDTESSVYNFE(1458.7732)GEDYR	717	snf2h	snf2h4	44.1	LLTQGFTNWNK(2284.9219)R	849	snf2h	snf2h_sant	18.1	unique	24.1	2.3	adp	2
613.05	4	-0.1	Z20170518-38_filtered	35.183	1	IDE(685.3871)AESLNDEELEEK+Incorrect Mono 1Da	824	snf2h	snf2h_hand	33.9	TK(1743.7687)QTAR+Incorrect Mono 1Da	4	h3	h3_tail	5.2	positional variants	27	2.3	adp	1.8
613.05	4	-0.1	Z20170518-38_filtered	35.183	1	ID(685.3871)EAESLNDEELEEK+Incorrect Mono 1Da	823	snf2h	snf2h_hand	33.9	TK(1743.7687)QTAR+Incorrect Mono 1Da	4	h3	h3_tail	5.2	positional variants	27	2.3	adp	1.3
762.788	5	1.1	Z20170518-38_filtered	42.388	1	IKK(1903.8647)DEKQNLLSVGDYR	131	snf2h	snf2h_auton	36.9	RTEQEEDE(1887.0214)ELLTESSK	154	snf2h	snf2h_auton	22.4	positional variants	29.3	2.3	adp	2.6
856.718	4	-1	Z20170518-38_filtered	63.209	1	LFELLEK(1709.8889)EILFYR+Incorrect Mono 1Da	789	snf2h	snf2h_hand	22.6	QTE(1693.9443)LFAHFIQPAAQK+Incorrect Mono 1Da	102	snf2h	snf2h_auton	18.2	unique	33.9	2.3	adp	4
661.033	3	-1.3	Z20170518-39_filtered	47.537	1	LSK(872.5008)MGESSLR+Incorrect Mono 1Da	696	snf2h	snf2h_negc	13.3	LFELLE(1088.5648)K+Incorrect Mono 1Da	788	snf2h	snf2h_hand	1.6	unique	35.6	2.3	adp	3.5
984.87	5	-2.5	Z20170518-38_filtered	60.546	1	GGPEGVAAQAVASAASAGPADAEME(1645.8424)EIFDDASPGK+Incorrect Mono 1Da	61	snf2h	snf2h1	51.5	K(3254.4674)DEKQNLLSVGDYR+Incorrect Mono 1Da	131	snf2h	snf2h_auton	5.8	positional variants	27.3	2.3	adp	1.2
971.682	4	-1.2	Z20170518-38_filtered	57.287	1	NFTMDTESSVYNFE(1578.7678)GEDYR+Incorrect Mono 1Da	717	snf2h	snf2h4	15.8	LGFDK(2284.9219)ENVYDELR+Incorrect Mono 1Da	968	snf2h	snf2h_slide	14.4	positional variants	34.4	2.3	adp	1.3
508.79	4	1	Z20170518-38_filtered	45.243	1	LFE(1140.6192)LLEK	785	snf2h	snf2h_hand	29.9	YK(872.5008)APFHQLR	931	snf2h	snf2h_slide	25.5	unique	29.8	2.3	adp	3
614.012	3	-0.4	Z20170518-39_filtered	43.403	1	ISYGTNK(872.5008)GK	945	snf2h	snf2h_slide	31.1	LFELLE(948.5029)K	788	snf2h	snf2h_hand	28	unique	28.7	2.3	adp	2
1199.09	4	-5.7	Z20170518-40_filtered	44.724	1	FLIC(Carbamidomethyl)M(Oxidation)LHK(2136.0422)LGFDKENVYDELR+Incorrect Mono 1Da	963	snf2h	snf2h_slide	57.5	LGFDKENVYDE(2637.3083)LRQC(Carbamidomethyl)IR+Incorrect Mono 1Da	974	snf2h	snf2h_slide	18.9	unique	12.7	2.3	adp	6
1075.05	4	1.8	Z20170518-37_filtered	45.715	1	934.5852-GSM(Oxidation)SSAAEPPPPPPPESAPSKPAASIASGGSNSSNK	1	snf2h	snf2h1	52.4	LLLPGE(3343.5627)LAK	102	h2b	h2b_ap	5.2	unique	25.3	2.3	adp	9
1051.51	4	0.7	Z20170518-37_filtered	55.168	1	GGPE(912.5393)GVAAQAVASAASAGPADAEM(Oxidation)EEIFDDASPGK+Incorrect Mono 1Da	40	snf2h	snf2h1	47.2	SK(3270.4623)LSEIVR+Incorrect Mono 1Da	321	snf2h	snf2h_reca1	3.9	unique	28	2.3	adp	3
854.432	4	2	Z20170518-38_filtered	60.634	1	EK(1835.8730)LLTQGFTNWNK	838	snf2h	snf2h_hand	27.9	TPEEVIE(1559.8096)YSAVFWER	884	snf2h	snf2h_sant	24.2	unique	32.1	2.3	adp	2
745.085	4	-1.7	Z20170518-38_filtered	45.333	1	NFTM(Oxidation)DTESSVYNFE(656.3857)GEDYR+Incorrect Mono 1Da	717	snf2h	snf2h4	20.8	K(2300.9168)ALDTK+Incorrect Mono 1Da	921	snf2h	snf2h_slide	0.8	unique	35.7	2.3	adp	2
893.446	3	0.3	Z20170518-38_filtered	43.231	1	ID(914.5338)EAESLNDEELEEK+Incorrect Mono 1Da	823	snf2h	snf2h_hand	36.5	TIGYK(1743.7687)VPR+Incorrect Mono 1Da	801	snf2h	snf2h_hand	5.5	positional variants	31	2.3	adp	1.3
707.192	6	-1.1	Z20170518-37_filtered	53.87	1	HGATHVFASK(1467.7874)ESEITDEDIDGILER+Incorrect Mono 1Da	667	snf2h	snf2h_negc	41.2	IAFTE(2750.3148)WIEPPKR+Incorrect Mono 1Da	731	snf2h	snf2h4	20.6	unique	29.6	2.3	adp	3
522.276	4	0.5	Z20170518-39_filtered	40.417	1	D(1140.6192)DIENIAR	865	snf2h	snf2h_sant	37.4	YK(926.4458)APFHQLR	931	snf2h	snf2h_slide	17.7	unique	19.1	2.3	adp	4
732.37	4	1.1	Z20170518-38_filtered	51.765	1	E(1191.6434)SEITDEDIDGILER+Incorrect Mono 1Da	668	snf2h	snf2h_negc	35.7	IYVGLSK(1714.7897)M(Oxidation)QR+Incorrect Mono 1Da	420	snf2h	snf2h_reca2	4.5	positional variants	25.9	2.3	adp	2.5
861.09	6	-1.7	Z20170518-37_filtered	58.645	1	GGPEGVAAQAVASAASAGPADAEMEE(1887.0214)IFDDASPGK+Incorrect Mono 1Da	62	snf2h	snf2h1	38.2	IKK(3254.4674)DEKQNLLSVGDYR+Incorrect Mono 1Da	131	snf2h	snf2h_auton	9.3	positional variants	28.6	2.3	adp	1.5
688.118	4	0	Z20170518-38_filtered	64.495	1	MVVLDK(1593.7320)LLPK	492	snf2h	snf2h_reca2	30	VLDILE(1136.6991)DYC(Carbamidomethyl)MWR	518	snf2h	snf2h_reca2	27.4	positional variants	31.1	2.3	adp	2.5
1054.3	5	0.1	Z20170518-38_filtered	41.071	1	1903.8647-GSM(Oxidation)SSAAEPPPPPPPESAPSKPAASIASGGSNSSNK+Incorrect Mono 1Da	1	snf2h	snf2h1	67.5	RTEQEEDEE(3343.5627)LLTESSK+Incorrect Mono 1Da	155	snf2h	snf2h_auton	11.3	positional variants	17	2.3	adp	1.7
644.598	4	0.3	Z20170518-38_filtered	46.98	1	IAFTE(1088.5648)WIEPPKR	731	snf2h	snf2h4	38.5	LSK(1467.7874)MGESSLR	696	snf2h	snf2h_negc	30.6	unique	29.8	2.3	adp	4
841.44	4	0.6	Z20170518-38_filtered	57.844	1	Q(Gln->pyro-Glu)TELFAHFIQPAAQK(926.4458)TPTSPLK	114	snf2h	snf2h_auton	87.7	D(2417.2743)DIENIAR	865	snf2h	snf2h_sant	9.2	unique	15.5	2.2	adp	2.3
967.034	4	0.4	Z20170518-37_filtered	83.156	1	VGAGAPVYLAAVLEYLTAE(949.5233)ILELAGNAAR	61	h2a	h2a_ap	87.2	AVTK(2896.5698)YTSAK	117	h2b	h2b_ap	9.6	unique	17.4	2.2	adp	5
485.062	5	0.5	Z20170518-39_filtered	37.152	1	NPE(1140.6192)LPNAAQAQK	807	snf2h	snf2h_hand	38.5	YK(1261.6415)APFHQLR	931	snf2h	snf2h_slide	23.1	unique	31.6	2.2	adp	5
507.786	4	-0.1	Z20170518-39_filtered	43.823	1	YLVID(912.5393)EAHR	310	snf2h	snf2h_reca1	29.6	SK(1096.5665)LSEIVR	321	snf2h	snf2h_reca1	28	positional variants	31	2.2	adp	4
458.251	5	0.5	Z20170518-38_filtered	23.308	1	Q(Gln->pyro-Glu)VHPD(1135.6574)TGISSK	48	h2b	h2b	24.2	RGPKPSTQK(1132.5513)R	1036	snf2h	snf2h5	20.2	unique	28.4	2.2	adp	3
733.022	3	0.6	Z20170518-39_filtered	34.845	1	YK(1036.4098)APFHQLR+Incorrect Mono 1Da	931	snf2h	snf2h_slide	17.1	NYTE(1140.6192)EEDR+Incorrect Mono 1Da	951	snf2h	snf2h_slide	7.2	unique	33.8	2.2	adp	5
614.833	4	0.4	Z20170518-39_filtered	41.769	1	IYVGLSK(1261.6415)MQR	420	snf2h	snf2h_reca2	37.5	NPE(1175.6485)LPNAAQAQK	807	snf2h	snf2h_hand	22.7	unique	30.2	2.2	adp	4
1000.26	4	1.4	Z20170518-38_filtered	52.044	1	QTELFAHFIQPAAQK(1544.6743)TPTSPLK	114	snf2h	snf2h_auton	66.3	Q(Gln->pyro-Glu)DSINAYNE(2434.3009)PNSTK	549	snf2h	snf2h_reca2	20.1	unique	20	2.2	adp	3.5
762.877	4	-0.5	Z20170518-38_filtered	58.674	1	ESE(1314.6788)ITDEDIDGILER	670	snf2h	snf2h_negc	57.5	IGK(1714.7897)DEMLQMIR	649	snf2h	snf2h_negc	17.4	unique	21.8	2.2	adp	2.7
1106.51	6	-0.5	Z20170518-36_filtered	51.332	1	3270.4623-GSM(Oxidation)SSAAEPPPPPPPESAPSKPAASIASGGSNSSNK+Incorrect Mono 1Da	1	snf2h	snf2h1	36.9	GGPE(3343.5627)GVAAQAVASAASAGPADAEM(Oxidation)EEIFDDASPGK+Incorrect Mono 1Da	40	snf2h	snf2h1	24.4	protein variants	27.8	2.2	adp	2.9
1140.79	4	-2	Z20170518-37_filtered	59.773	1	GGPEGVAAQAVASAASAGPAD(1285.6449)AEMEEIFDDASPGK+Incorrect Mono 1Da	57	snf2h	snf2h1	61.9	SVC(Carbamidomethyl)LIGDK(3254.4674)EQR+Incorrect Mono 1Da	266	snf2h	snf2h_reca1	7.7	unique	23.9	2.2	adp	2.5
734.866	4	0.1	Z20170518-38_filtered	46.666	1	LLTQGFTNWNK(1458.6515)R	849	snf2h	snf2h_sant	26.2	E(1458.7732)IQEPDPTYEEK	74	snf2h	snf2h1	18.4	unique	26.6	2.2	adp	2
689.174	5	0.9	Z20170518-37_filtered	59.63	1	E(1175.6485)WYTRILMKDIDILNSAGK	424	snf2h	snf2h_reca2	29.1	IYVGLSK(2247.1722)MQR	420	snf2h	snf2h_reca2	26.7	positional variants	29.3	2.2	adp	9.5
438.744	6	0.9	Z20170518-38_filtered	45.825	1	IAFTE(1140.6192)WIEPPKR	731	snf2h	snf2h4	34	YK(1467.7874)APFHQLR	931	snf2h	snf2h_slide	31.3	unique	29.1	2.2	adp	3
732.37	4	1.1	Z20170518-38_filtered	51.765	1	ESE(1191.6434)ITDEDIDGILER+Incorrect Mono 1Da	670	snf2h	snf2h_negc	36.7	IYVGLSK(1714.7897)M(Oxidation)QR+Incorrect Mono 1Da	420	snf2h	snf2h_reca2	4.5	positional variants	25.3	2.2	adp	1.7
732.585	5	0.3	Z20170518-38_filtered	51.285	1	QTELFAHFIQPAAQK(1204.5724)TPTSPLK+Incorrect Mono 1Da	114	snf2h	snf2h_auton	24.4	FITDNTVE(2434.3009)ER+Incorrect Mono 1Da	616	snf2h	snf2h_reca2	6.5	positional variants	27.3	2.2	adp	4.5
732.585	5	0.3	Z20170518-38_filtered	51.285	1	QTELFAHFIQPAAQK(1204.5724)TPTSPLK+Incorrect Mono 1Da	114	snf2h	snf2h_auton	24.4	FITDNTVEE(2434.3009)R+Incorrect Mono 1Da	617	snf2h	snf2h_reca2	6.5	positional variants	27.3	2.2	adp	2.5
760.825	5	-4.6	Z20170518-38_filtered	83.2	1	VGAGAPVYLAAVLEYLTAE(883.5240)ILELAGNAAR+Incorrect Mono 1Da	61	h2a	h2a_ap	47.7	IGQTK(2896.5698)TVR+Incorrect Mono 1Da	602	snf2h	snf2h_reca2	0.2	unique	29.1	2.2	adp	10.5
1103.55	4	-2.9	Z20170518-37_filtered	65.782	1	GGPEGVAAQAVASAASAGPADAEMEE(1136.6991)IFDDASPGK+Incorrect Mono 1Da	62	snf2h	snf2h1	31.8	MVVLDK(3254.4674)LLPK+Incorrect Mono 1Da	492	snf2h	snf2h_reca2	4.7	positional variants	25.3	2.2	adp	1.6
943.941	4	3.3	Z20170518-38_filtered	58.01	1	NFTMD(1467.7874)TESSVYNFEGEDYR+Incorrect Mono 1Da	708	snf2h	snf2h4	25	IAFTEWIEPPK(2284.9219)R+Incorrect Mono 1Da	737	snf2h	snf2h_hand	15.5	positional variants	28.8	2.2	adp	1.5
1103.55	4	-2.9	Z20170518-37_filtered	65.782	1	GGPEGVAAQAVASAASAGPAD(1136.6991)AEMEEIFDDASPGK+Incorrect Mono 1Da	57	snf2h	snf2h1	31.8	MVVLDK(3254.4674)LLPK+Incorrect Mono 1Da	492	snf2h	snf2h_reca2	4.7	positional variants	25.3	2.2	adp	1.3
687.36	3	0.4	Z20170518-39_filtered	34.083	1	FITD(836.4756)NTVEER	612	snf2h	snf2h_reca2	23.2	VSEPK(1204.5724)APK	760	snf2h	snf2h_hand	21.1	unique	26.8	2.2	adp	2
1103.55	4	-2.9	Z20170518-37_filtered	65.782	1	GGPEGVAAQAVASAASAGPADAE(1136.6991)MEEIFDDASPGK+Incorrect Mono 1Da	59	snf2h	snf2h1	31.8	MVVLDK(3254.4674)LLPK+Incorrect Mono 1Da	492	snf2h	snf2h_reca2	4.7	positional variants	25.3	2.2	adp	1.6
576.672	3	-0.3	Z20170518-39_filtered	34.446	1	K(812.4756)SAPATGGVK	27	h3	h3_tail	36.2	STE(896.5080)LLIR	59	h3	h3	18.3	unique	24.6	2.2	adp	2
923.766	3	2.5	Z20170518-38_filtered	43.851	1	Q(Gln->pyro-Glu)K(1052.4815)EIQEPDPTYEEK	73	snf2h	snf2h1	42.1	FE(1697.7784)DSPSYVK	171	snf2h	snf2h2	14.8	unique	16.7	2.2	adp	2.5
1103.55	4	-2.9	Z20170518-37_filtered	65.782	1	GGPEGVAAQAVASAASAGPADAEME(1136.6991)EIFDDASPGK+Incorrect Mono 1Da	61	snf2h	snf2h1	31.8	MVVLDK(3254.4674)LLPK+Incorrect Mono 1Da	492	snf2h	snf2h_reca2	4.7	positional variants	25.3	2.2	adp	1.6
893.446	3	0.3	Z20170518-38_filtered	43.231	1	IDE(914.5338)AESLNDEELEEK+Incorrect Mono 1Da	824	snf2h	snf2h_hand	35	TIGYK(1743.7687)VPR+Incorrect Mono 1Da	801	snf2h	snf2h_hand	5.5	positional variants	29.5	2.2	adp	1.3
1197.34	4	-0.9	Z20170518-38_filtered	64.477	1	GGPEGVAAQAVASAASAGPADAE(1511.8381)MEEIFDDASPGK+Incorrect Mono 1Da	59	snf2h	snf2h1	38.6	ILMK(3254.4674)DIDILNSAGK+Incorrect Mono 1Da	432	snf2h	snf2h_reca2	7.1	positional variants	27.9	2.2	adp	1.9
1197.34	4	-0.9	Z20170518-38_filtered	64.477	1	GGPEGVAAQAVASAASAGPAD(1511.8381)AEMEEIFDDASPGK+Incorrect Mono 1Da	57	snf2h	snf2h1	38.6	ILMK(3254.4674)DIDILNSAGK+Incorrect Mono 1Da	432	snf2h	snf2h_reca2	7.1	positional variants	27.9	2.1	adp	1.6
632.327	3	-2.5	Z20170518-40_filtered	35.811	1	DDIE(948.5029)NIAR+Incorrect Mono 1Da	868	snf2h	snf2h_sant	5	ISYGTNK(926.4458)GK+Incorrect Mono 1Da	945	snf2h	snf2h_slide	1.4	unique	34.6	2.1	adp	5
601.063	4	-0.2	Z20170518-39_filtered	42.389	1	SVC(Carbamidomethyl)LIGDK(1096.5665)EQR	266	snf2h	snf2h_reca1	26.8	YLVIDE(1285.6449)AHR	311	snf2h	snf2h_reca1	22.1	unique	27.2	2.1	adp	2
771.166	4	-0.4	Z20170518-38_filtered	47.808	1	QTELFAHFIQPAAQK(627.3228)TPTSPLK+Incorrect Mono 1Da	114	snf2h	snf2h_auton	21	EE(2434.3009)QLK+Incorrect Mono 1Da	818	snf2h	snf2h_hand	0.8	unique	30.2	2.1	adp	2
913.482	4	1.1	Z20170518-38_filtered	65.835	1	FEYLLK(1128.5564)QTELFAHFIQPAAQK	99	snf2h	snf2h_auton	35.1	Q(Gln->pyro-Glu)NLLSVGD(2503.3264)YR	142	snf2h	snf2h_auton	20.1	unique	28.3	2.1	adp	2
1089.27	4	0.4	Z20170518-38_filtered	64.822	1	GGPEGVAAQAVASAASAGPAD(1079.5553)AEMEEIFDDASPGK+Incorrect Mono 1Da	57	snf2h	snf2h1	64.4	FDWFLK(3254.4674)SR+Incorrect Mono 1Da	992	snf2h	snf2h_slide	-1.7	unique	32	2.1	adp	2
709.363	4	0.4	Z20170518-39_filtered	43.348	1	NPELPNAAQAQK(926.4458)EEQLK	816	snf2h	snf2h_hand	84.8	D(1888.9643)DIENIAR	865	snf2h	snf2h_sant	8.6	positional variants	16	2.1	adp	1.5
956.13	3	1.6	Z20170518-38_filtered	48.574	1	E(1131.5594)SEITDEDIDGILER+Incorrect Mono 1Da	668	snf2h	snf2h_negc	36.2	TAEMNEK(1714.7897)LSK+Incorrect Mono 1Da	693	snf2h	snf2h_negc	3.1	unique	27.8	2.1	adp	3.3
600.124	5	-0.6	Z20170518-38_filtered	46.819	1	QTELFAHFIQPAAQK(542.2700)TPTSPLK+Incorrect Mono 1Da	114	snf2h	snf2h_auton	34.8	E(2434.3009)VEGK+Incorrect Mono 1Da	873	snf2h	snf2h_sant	-0.7	unique	28.2	2.1	adp	3.5
775.368	4	-0.7	Z20170518-39_filtered	48.712	1	IDEAESLNDE(1334.6619)ELEEK+Incorrect Mono 1Da	831	snf2h	snf2h_hand	19.6	DFNQFIK(1743.7687)ANEK+Incorrect Mono 1Da	857	snf2h	snf2h_sant	17.2	positional variants	29.1	2.1	adp	2.5
862.718	4	0.3	Z20170518-38_filtered	57.59	1	FEYLLK(924.5029)QTELFAHFIQPAAQK+Incorrect Mono 1Da	99	snf2h	snf2h_auton	46.3	LVD(2503.3264)QNLNK+Incorrect Mono 1Da	641	snf2h	snf2h_reca2	12	unique	27	2.1	adp	2
475.463	5	-0.1	Z20170518-38_filtered	47.444	1	YK(1213.6489)APFHQLR	931	snf2h	snf2h_slide	30.6	C(Carbamidomethyl)NTLITLIE(1140.6192)R	1011	snf2h	snf2h_slide	22.6	unique	25.2	2.1	adp	2
705.604	4	1.1	Z20170518-38_filtered	34.414	1	RTEQEE(896.5080)DEELLTESSK	152	snf2h	snf2h_auton	26.5	K(1903.8647)SAPATGGVK	27	h3	h3_tail	19.6	unique	25	2.1	adp	2
612.58	4	0.6	Z20170518-39_filtered	42.078	1	FITDNTVE(1222.7034)ER+Incorrect Mono 1Da	616	snf2h	snf2h_reca2	7.8	LVDQNLNK(1204.5724)IGK+Incorrect Mono 1Da	646	snf2h	snf2h_negc	7.5	unique	32.6	2.1	adp	2.8
479.094	6	0.3	Z20170518-38_filtered	44.722	1	QTE(1140.6192)LFAHFIQPAAQK	102	snf2h	snf2h_auton	27.1	YK(1709.8889)APFHQLR	931	snf2h	snf2h_slide	21.6	unique	27.9	2.1	adp	2
935.739	3	-0.5	Z20170518-39_filtered	45.082	1	NFTMDTESSVYNFE(500.2595)GEDYR+Incorrect Mono 1Da	717	snf2h	snf2h4	12.2	K(2284.9219)DEK+Incorrect Mono 1Da	131	snf2h	snf2h_auton	0.7	unique	32.1	2.1	adp	1.5
623.336	6	0.4	Z20170518-37_filtered	53.5	1	IAFTE(2247.1701)WIEPPKR+Incorrect Mono 1Da	731	snf2h	snf2h4	23.2	APRPPK(1467.7874)QPNVQDFQFFPPR+Incorrect Mono 1Da	769	snf2h	snf2h_hand	22.1	unique	28.5	2.1	adp	10
966.881	5	1.2	Z20170518-37_filtered	47.461	1	1467.7874-GSM(Oxidation)SSAAEPPPPPPPESAPSKPAASIASGGSNSSNK	1	snf2h	snf2h1	70.3	IAFTEWIE(3343.5627)PPKR	734	snf2h	snf2h4	7.8	unique	17.2	2.1	adp	7
531.274	4	-1.6	Z20170518-39_filtered	34.731	1	NPE(841.4195)LPNAAQAQK	807	snf2h	snf2h_hand	35.7	ANEK(1261.6415)WGR	861	snf2h	snf2h_sant	18.8	unique	25.9	2.1	adp	4
739.773	5	-0.5	Z20170518-37_filtered	48.176	1	HGATHVFASK(924.5029)ESEITDEDIDGILER+Incorrect Mono 1Da	667	snf2h	snf2h_negc	46	LVD(2750.3148)QNLNK+Incorrect Mono 1Da	641	snf2h	snf2h_reca2	6.5	unique	26.5	2.1	adp	2
575.564	4	0.6	Z20170518-39_filtered	51.723	1	LLTQGFTNWNK(821.4436)R	849	snf2h	snf2h_sant	51.3	E(1458.7732)ILFYR	790	snf2h	snf2h_hand	16.4	unique	20.2	2.1	adp	2
772.99	5	-0.9	Z20170518-38_filtered	60.038	1	APRPPK(1593.7320)QPNVQDFQFFPPR+Incorrect Mono 1Da	769	snf2h	snf2h_hand	26.2	VLDILE(2247.1701)DYC(Carbamidomethyl)MWR+Incorrect Mono 1Da	518	snf2h	snf2h_reca2	11.4	positional variants	27.4	2.1	adp	3.2
812.247	5	-0.6	Z20170518-38_filtered	81.285	1	VGAGAPVYLAAVLEYLTAE(1140.6192)ILELAGNAAR+Incorrect Mono 1Da	61	h2a	h2a_ap	42.5	YK(2896.5698)APFHQLR+Incorrect Mono 1Da	931	snf2h	snf2h_slide	5.2	unique	20.2	2.1	adp	3.5
700.838	4	-0.1	Z20170518-38_filtered	36.012	1	RTEQEEDEE(876.4454)LLTESSK+Incorrect Mono 1Da	155	snf2h	snf2h_auton	25.3	EFK(1903.8647)TTNR+Incorrect Mono 1Da	330	snf2h	snf2h_reca1	6.4	unique	28	2.1	adp	2
452.047	5	0.1	Z20170518-38_filtered	40.278	1	YLVIDE(1140.6192)AHR	311	snf2h	snf2h_reca1	29.9	YK(1096.5665)APFHQLR	931	snf2h	snf2h_slide	27.2	unique	32.1	2.1	adp	4
603.81	4	-0.5	Z20170518-39_filtered	35.602	1	TAEMNEK(1261.6415)LSK	693	snf2h	snf2h_negc	28.1	NPE(1131.5594)LPNAAQAQK	807	snf2h	snf2h_hand	24.5	unique	29.9	2.1	adp	2.5
692.574	5	0.6	Z20170518-38_filtered	58.92	1	ILMKD(1926.9774)IDILNSAGK+Incorrect Mono 1Da	433	snf2h	snf2h_reca2	19.9	IYVGLSK(1511.8381)M(Oxidation)QREWYTR+Incorrect Mono 1Da	420	snf2h	snf2h_reca2	8.3	positional variants	31.9	2	adp	3.7
1027.28	4	0.6	Z20170518-37_filtered	67.022	1	FEYLLK(1583.7521)QTELFAHFIQPAAQK	99	snf2h	snf2h_auton	23.4	Q(Gln->pyro-Glu)PNVQD(2503.3264)FQFFPPR	775	snf2h	snf2h_hand	21.9	unique	27.5	2	adp	6
508.79	4	0.6	Z20170518-38_filtered	46.998	1	LFELLE(1140.6192)K	788	snf2h	snf2h_hand	32.8	YK(872.5008)APFHQLR	931	snf2h	snf2h_slide	19.9	unique	25.4	2	adp	4
465.054	5	0.3	Z20170518-38_filtered	42.809	1	ISGLIYE(1140.6192)ETR	52	h4	h4	34.5	YK(1161.6030)APFHQLR	931	snf2h	snf2h_slide	24.6	unique	30	2	adp	2
658.093	4	1.7	Z20170518-38_filtered	54.912	1	K(1311.6863)ANYAVDAYFR	741	snf2h	snf2h_hand	32.2	IAFTE(1298.6408)WIEPPK	731	snf2h	snf2h4	19.9	unique	26.1	2	adp	7.5
800.728	3	0.2	Z20170518-39_filtered	36.502	1	Q(Gln->pyro-Glu)DSINAYNE(836.4756)PNSTK	549	snf2h	snf2h_reca2	34.6	VSEPK(1544.6743)APK	760	snf2h	snf2h_hand	18.6	unique	23.7	2	adp	2
894.484	4	0.7	Z20170518-38_filtered	70.845	1	GLNWLISLYENGINGILAD(883.5240)EMGLGK+Incorrect Mono 1Da	207	snf2h	snf2h_reca1	39.3	IGQTK(2671.3680)TVR+Incorrect Mono 1Da	602	snf2h	snf2h_reca2	-2.2	positional variants	38.4	2	adp	1.5
772.99	5	-0.9	Z20170518-38_filtered	60.038	1	APRPPK(1593.7320)QPNVQDFQFFPPR+Incorrect Mono 1Da	769	snf2h	snf2h_hand	26.2	VLD(2247.1701)ILEDYC(Carbamidomethyl)MWR+Incorrect Mono 1Da	515	snf2h	snf2h_reca2	12.7	positional variants	28.7	2	adp	2.2
1023.5	3	1.9	Z20170518-38_filtered	56.107	1	ESEITDED(1334.6619)IDGILER	675	snf2h	snf2h_negc	32.2	DFNQFIK(1714.7897)ANEK	857	snf2h	snf2h_sant	18.7	unique	27.3	2	adp	1.2
489.024	4	0.4	Z20170518-38_filtered	43.251	1	YK(793.4374)APFHQLR	931	snf2h	snf2h_slide	31.6	FE(1140.6192)YLLK	95	snf2h	snf2h_auton	22.1	unique	30	2	adp	6
692.373	5	1	Z20170518-37_filtered	58.092	1	ILMK(1926.9774)DIDILNSAGK	432	snf2h	snf2h_reca2	29.8	IYVGLSKM(Oxidation)QRE(1511.8381)WYTR	424	snf2h	snf2h_reca2	28.4	positional variants	23.1	2	adp	4.7
489.272	3	0.8	Z20170518-40_filtered	21.845	1	K(550.2751)SAPATGGVK	27	h3	h3_tail	28.9	YTSAK-896.5080	122	h2b	h2b_ap	-2	unique	24.6	2	adp	2
745.973	5	-1.4	Z20170518-38_filtered	48.481	1	APRPPK(1458.6515)QPNVQDFQFFPPR+Incorrect Mono 1Da	769	snf2h	snf2h_hand	28.6	E(2247.1701)IQEPDPTYEEK+Incorrect Mono 1Da	74	snf2h	snf2h1	24.6	unique	30.4	2	adp	3
637.519	6	0.7	Z20170518-37_filtered	71.499	1	GVLK(1317.7041)VFLENVIRDAVTYTEHAK	59	h4	h4	71.2	RISGLIYEE(2483.3536)TR	53	h4	h4	7.7	positional variants	13.8	2	adp	32.8
932.216	4	-0.6	Z20170518-38_filtered	49.149	1	APRPPK(1458.6515)QPNVQDFQFFPPR+Incorrect Mono 1Da	769	snf2h	snf2h_hand	26	EIQE(2247.1701)PDPTYEEK+Incorrect Mono 1Da	77	snf2h	snf2h1	16.7	positional variants	30.6	2	adp	1.5
1175.3	4	1.6	Z20170518-38_filtered	60.747	1	GGPEGVAAQAVASAASAGPADAE(1423.6772)MEEIFDDASPGK+Incorrect Mono 1Da	59	snf2h	snf2h1	69.2	FEDSPSYVK(3254.4674)WGK+Incorrect Mono 1Da	178	snf2h	snf2h2	-0.7	unique	19.6	2	adp	2.3
735.242	6	-0.1	Z20170518-37_filtered	80.418	1	VGAGAPVYLAAVLEYLTAE(1489.8253)ILELAGNAAR+Incorrect Mono 1Da	61	h2a	h2a_ap	39.9	VLK(2896.5698)QVHPDTGISSK+Incorrect Mono 1Da	43	h2b	h2b	5	unique	23.6	2	adp	15
637.519	6	0.7	Z20170518-37_filtered	71.499	1	GVLK(1317.7041)VFLENVIRDAVTYTEHAK	59	h4	h4	71.2	RISGLIYE(2483.3536)ETR	52	h4	h4	7.3	positional variants	13.8	2	adp	18.3
785.428	4	0.7	Z20170518-38_filtered	55.732	1	APRPPK(872.5008)QPNVQDFQFFPPR	769	snf2h	snf2h_hand	61.5	LFELLE(2247.1701)K	788	snf2h	snf2h_hand	9.6	unique	17	2	adp	9
501.027	4	0.3	Z20170518-39_filtered	38.222	1	YK(841.4480)APFHQLR	931	snf2h	snf2h_slide	32.5	IMAQIE(1140.6192)R	907	snf2h	snf2h_slide	27.1	unique	28.5	2	adp	6
549.056	4	0.8	Z20170518-39_filtered	40.002	1	SK(1261.6415)LSEIVR	321	snf2h	snf2h_reca1	29.8	NPE(912.5393)LPNAAQAQK	807	snf2h	snf2h_hand	22.7	unique	27.5	2	adp	3
777.914	4	-1.3	Z20170518-38_filtered	49.143	1	APRPPK(841.4480)QPNVQDFQFFPPR+Incorrect Mono 1Da	769	snf2h	snf2h_hand	29.6	IMAQIE(2247.1701)R+Incorrect Mono 1Da	907	snf2h	snf2h_slide	-0.1	unique	34.3	2	adp	3
734.98	5	1.7	Z20170518-37_filtered	55.536	1	FEYLLK(1148.5210)QTELFAHFIQPAAQK	99	snf2h	snf2h_auton	55.9	LDGQTPHD(2503.3264)ER	538	snf2h	snf2h_reca2	16.9	unique	24.8	2	adp	3
459.994	4	0.5	Z20170518-39_filtered	30.919	1	FITDNTVE(612.3595)ER+Incorrect Mono 1Da	616	snf2h	snf2h_reca2	8	IK(1204.5724)NEK+Incorrect Mono 1Da	316	snf2h	snf2h_reca1	5.4	unique	27.8	2	adp	3
928.449	3	5.6	Z20170518-38_filtered	54.057	1	TPEEVIE(927.4232)YSAVFWER+Incorrect Mono 1Da	884	snf2h	snf2h_sant	15.8	K(1835.8730)MDGAPDGR+Incorrect Mono 1Da	1038	snf2h	snf2h5	9.2	unique	31.1	2	adp	2
714.55	5	-0.7	Z20170518-38_filtered	44.27	1	K(1903.8647)DEKQNLLSVGDYR	131	snf2h	snf2h_auton	26.5	RTEQEEDEE(1645.8424)LLTESSK	155	snf2h	snf2h_auton	20.1	positional variants	28	2	adp	1.8
748.133	4	1.4	Z20170518-38_filtered	50.984	1	E(1511.8381)IQEPDPTYEEK	74	snf2h	snf2h1	27.9	ILMK(1458.6515)DIDILNSAGK	432	snf2h	snf2h_reca2	26.4	unique	30.2	2	adp	2
805.743	3	0.7	Z20170518-39_filtered	43.003	1	Q(Gln->pyro-Glu)K(697.4123)EIQEPDPTYEEK+Incorrect Mono 1Da	73	snf2h	snf2h1	25.4	LSE(1697.7784)IVR+Incorrect Mono 1Da	324	snf2h	snf2h_reca1	2.4	unique	27.1	2	adp	4
718.602	4	-0.1	Z20170518-38_filtered	36.391	1	ISYGTNK(1903.8647)GK	945	snf2h	snf2h_slide	22.9	RTEQEEDEE(948.5029)LLTESSK	155	snf2h	snf2h_auton	22.8	positional variants	26.5	2	adp	1.5
1146.54	4	2.5	Z20170518-37_filtered	59.444	1	GGPEGVAAQAVASAASAGPADAEMEEIFDDASPGK(1052.4815)QK+Incorrect Mono 1Da	71	snf2h	snf2h1	23.8	FE(3510.6209)DSPSYVK+Incorrect Mono 1Da	171	snf2h	snf2h2	-5.4	positional variants	42.3	2	adp	1.5
806.655	4	0.5	Z20170518-38_filtered	65.424	1	AM(Oxidation)SIMNSFVND(1447.7857)VFER	65	h2b	h2b	33.1	TVTAMDVVYALK(1756.7913)R	91	h4	h4	18.6	positional variants	20.8	2	adp	3.5
598.307	4	-1.1	Z20170518-39_filtered	42.095	1	E(912.5393)IQEPDPTYEEK	74	snf2h	snf2h1	47.3	SK(1458.6515)LSEIVR	321	snf2h	snf2h_reca1	15.8	unique	22	2	adp	2
672.075	4	-0.1	Z20170518-39_filtered	35.456	1	QDSINAYNE(1104.5597)PNSTK	549	snf2h	snf2h_reca2	45.5	LSK(1561.7009)M(Oxidation)GESSLR	696	snf2h	snf2h_negc	16.9	unique	22.8	1.9	adp	2
624.81	4	0	Z20170518-39_filtered	42.769	1	LLTQGFTNWNK(1018.4277)R	849	snf2h	snf2h_sant	45.9	E(1458.7732)NM(Oxidation)ELEEK	1013	snf2h	snf2h_slide	11.5	unique	19.3	1.9	adp	1.5
781.623	5	1.7	Z20170518-37_filtered	60.124	1	Q(Gln->pyro-Glu)TELFAHFIQPAAQK(1467.7874)TPTSPLK	114	snf2h	snf2h_auton	57.3	IAFTE(2417.2743)WIEPPKR	731	snf2h	snf2h4	15.1	unique	22	1.9	adp	2
627.075	4	0	Z20170518-39_filtered	54.06	1	IAFTEWIEPPK(1018.4720)R	737	snf2h	snf2h_hand	60.7	E(1467.7874)NVYDELR	969	snf2h	snf2h_slide	13.6	unique	15.5	1.9	adp	1.3
535.303	5	0	Z20170518-38_filtered	39.269	1	QTE(942.5763)LFAHFIQPAAQK+Incorrect Mono 1Da	102	snf2h	snf2h_auton	33.7	APK(1709.8889)APRPPK+Incorrect Mono 1Da	763	snf2h	snf2h_hand	6.5	unique	24.5	1.9	adp	2
873.1	3	0.2	Z20170518-39_filtered	42.738	1	IDEAE(854.4974)SLNDEELEEK	826	snf2h	snf2h_hand	55.5	ALDTK(1743.7687)IGR	926	snf2h	snf2h_slide	13.9	unique	20.8	1.9	adp	2
841.705	4	1.4	Z20170518-38_filtered	59.113	1	FEYLLK(841.4480)QTELFAHFIQPAAQK	99	snf2h	snf2h_auton	61.4	IMAQIE(2503.3264)R	907	snf2h	snf2h_slide	12.5	unique	21	1.9	adp	5
528.78	4	0.2	Z20170518-39_filtered	49.497	1	K(793.4374)ANYAVDAYFR+Incorrect Mono 1Da	741	snf2h	snf2h_hand	25.6	FE(1298.6408)YLLK+Incorrect Mono 1Da	95	snf2h	snf2h_auton	5.1	unique	26	1.9	adp	4
895.115	3	0.4	Z20170518-39_filtered	63.394	1	Q(Gln->pyro-Glu)PNVQD(1079.5553)FQFFPPR+Incorrect Mono 1Da	775	snf2h	snf2h_hand	15.4	FDWFLK(1583.7521)SR+Incorrect Mono 1Da	992	snf2h	snf2h_slide	4.3	unique	30.8	1.9	adp	4
902.254	4	0.1	Z20170518-38_filtered	83.292	1	VGAGAPVYLAAVLEYLTAE(690.4065)ILELAGNAAR	61	h2a	h2a_ap	98.8	K(2896.5698)TIGYK	796	snf2h	snf2h_hand	4.6	unique	12.7	1.9	adp	6.5
1237.59	4	-3.2	Z20170518-37_filtered	52.636	1	1583.7521-GSM(Oxidation)SSAAEPPPPPPPESAPSKPAASIASGGSNSSNK+Incorrect Mono 1Da	1	snf2h	snf2h1	37.6	Q(Gln->pyro-Glu)PNVQD(3343.5627)FQFFPPR+Incorrect Mono 1Da	775	snf2h	snf2h_hand	13.4	unique	16.1	1.9	adp	3
665.573	4	-0.6	Z20170518-38_filtered	54.214	1	FLIC(Carbamidomethyl)MLHK(1036.4098)LGFDK+Incorrect Mono 1Da	963	snf2h	snf2h_slide	16.9	NYTEE(1602.8415)EDR+Incorrect Mono 1Da	952	snf2h	snf2h_slide	6.7	unique	30.2	1.9	adp	2.2
610.563	4	-0.8	Z20170518-38_filtered	50.228	1	LGFDK(841.4480)ENVYDELR	968	snf2h	snf2h_slide	32.2	IMAQIE(1578.7678)R	907	snf2h	snf2h_slide	27.4	unique	26.9	1.9	adp	7
469.742	4	-0.2	Z20170518-39_filtered	37.855	1	ALDTK(1002.4328)IGR	926	snf2h	snf2h_slide	27.9	E(854.4974)NMELEEK	1013	snf2h	snf2h_slide	20.8	unique	29.3	1.9	adp	4
904.435	3	0	Z20170518-38_filtered	39.731	1	IDEAESLND(948.5029)EELEEK	830	snf2h	snf2h_hand	55.9	ISYGTNK(1743.7687)GK	945	snf2h	snf2h_slide	21.5	positional variants	17.4	1.9	adp	3.3
899.826	5	-0.8	Z20170518-37_filtered	38.427	1	1148.5210-GSMSSAAEPPPPPPPESAPSKPAASIASGGSNSSNK	1	snf2h	snf2h1	63	LD(3327.5677)GQTPHDER	532	snf2h	snf2h_reca2	2.3	unique	11.5	1.9	adp	4.8
724.701	3	-2.5	Z20170518-39_filtered	37.199	1	FITDNTVEE(948.5029)R	617	snf2h	snf2h_reca2	25.4	ISYGTNK(1204.5724)GK	945	snf2h	snf2h_slide	20.9	unique	27.8	1.9	adp	1.5
582.286	5	0	Z20170518-38_filtered	41.932	1	TEQEEDE(1140.6192)ELLTESSK	154	snf2h	snf2h_auton	49.9	YK(1747.7636)APFHQLR	931	snf2h	snf2h_slide	15.7	unique	22.9	1.9	adp	2.3
556.32	4	-0.7	Z20170518-39_filtered	33.575	1	D(896.5080)NIQGITKPAIR	24	h4	h4_tail	31.4	K(1306.7357)SAPATGGVK	27	h3	h3_tail	22.6	unique	28.1	1.9	adp	2
662.352	3	0.4	Z20170518-39_filtered	41.686	1	FED(912.5393)SPSYVK+Incorrect Mono 1Da	172	snf2h	snf2h2	8.7	SK(1052.4815)LSEIVR+Incorrect Mono 1Da	321	snf2h	snf2h_reca1	6.9	unique	30	1.9	adp	2.5
681.159	5	0	Z20170518-38_filtered	50.066	1	TPEEVIE(1546.8766)YSAVFWER	884	snf2h	snf2h_sant	61.6	TPTSPLK(1835.8730)MKPGRPR	121	snf2h	snf2h_auton	25.1	unique	19.3	1.9	adp	7.5
700.123	4	0.5	Z20170518-38_filtered	50.301	1	TPEEVIEYSAVFWE(942.5763)R	891	snf2h	snf2h_sant	51.2	APK(1835.8730)APRPPK	763	snf2h	snf2h_hand	12.3	unique	20.8	1.9	adp	2
532.762	4	0.4	Z20170518-39_filtered	41.978	1	K(1376.6183)FNWR+Incorrect Mono 1Da	301	snf2h	snf2h_reca1	7.7	STLHNWM(Oxidation)SE(731.3867)FK+Incorrect Mono 1Da	249	snf2h	snf2h_reca1	7.1	unique	31.9	1.9	adp	3
674.34	3	-0.6	Z20170518-39_filtered	34.912	1	FE(948.5029)DSPSYVK+Incorrect Mono 1Da	171	snf2h	snf2h2	7.5	ISYGTNK(1052.4815)GK+Incorrect Mono 1Da	945	snf2h	snf2h_slide	0.4	unique	29.2	1.9	adp	3
1064.19	3	-1.1	Z20170518-38_filtered	60.741	1	TPEEVIE(1334.6619)YSAVFWER+Incorrect Mono 1Da	884	snf2h	snf2h_sant	23	DFNQFIK(1835.8730)ANEK+Incorrect Mono 1Da	857	snf2h	snf2h_sant	11.3	unique	25.5	1.9	adp	2
625.662	3	1.1	Z20170518-39_filtered	36.723	1	ENVYDE(836.4756)LR+Incorrect Mono 1Da	974	snf2h	snf2h_slide	5.8	VSEPK(1018.4720)APK+Incorrect Mono 1Da	760	snf2h	snf2h_hand	-0.2	unique	31.8	1.9	adp	2
772.853	4	-0.7	Z20170518-39_filtered	47.302	1	NFTMDTESSVYNFE(783.4491)GEDYR+Incorrect Mono 1Da	717	snf2h	snf2h4	16.4	IK(2284.9219)ADVEK+Incorrect Mono 1Da	399	snf2h	snf2h_reca1	3	unique	30	1.9	adp	2
841.469	5	1.2	Z20170518-37_filtered	76.708	1	VGAGAPVYLAAVLEYLTAE(1286.7208)ILELAGNAAR+Incorrect Mono 1Da	61	h2a	h2a_ap	35.9	SAPATGGVKK(2896.5698)PHR+Incorrect Mono 1Da	37	h3	h3_tail	2.7	positional variants	23.1	1.9	adp	5
948.66	5	5.4	Z20170518-38_filtered	56.348	1	NFTMDTE(2434.3009)SSVYNFEGEDYR+Incorrect Mono 1Da	710	snf2h	snf2h4	32.6	QTELFAHFIQPAAQK(2284.9219)TPTSPLK+Incorrect Mono 1Da	114	snf2h	snf2h_auton	24.4	unique	23.4	1.9	adp	2.3
449.759	4	0	Z20170518-39_filtered	21.069	1	KQLATK(809.4032)AAR	23	h3	h3_tail	32.9	HAVSE(967.5927)GTK	110	h2b	h2b_ap	22.2	unique	24.2	1.9	adp	4
690.564	5	0.4	Z20170518-37_filtered	61.806	1	FEYLLK(926.4458)QTELFAHFIQPAAQK	99	snf2h	snf2h_auton	64.1	DDIE(2503.3264)NIAR	868	snf2h	snf2h_sant	9.9	unique	18.4	1.8	adp	2
660.34	4	-0.4	Z20170518-38_filtered	53.01	1	TPEEVIE(783.4491)YSAVFWER	884	snf2h	snf2h_sant	63	IK(1835.8730)ADVEK	399	snf2h	snf2h_reca1	10.6	unique	15	1.8	adp	2
662.739	5	0.4	Z20170518-38_filtered	39.669	1	IDEAE(1546.8766)SLNDEELEEK	826	snf2h	snf2h_hand	63.2	TPTSPLK(1743.7687)MKPGRPR	121	snf2h	snf2h_auton	12.7	positional variants	19.2	1.8	adp	1.3
662.739	5	0.4	Z20170518-38_filtered	39.669	1	IDEAE(1546.8766)SLNDEELEEK	826	snf2h	snf2h_hand	63.2	TPTSPLKMK(1743.7687)PGRPR	123	snf2h	snf2h_auton	12.7	positional variants	19.2	1.8	adp	2.3
1095.52	4	-1.3	Z20170518-37_filtered	53.815	1	GGPEGVAAQAVASAASAGPADAE(1088.5648)M(Oxidation)EEIFDDASPGK+Incorrect Mono 1Da	59	snf2h	snf2h1	44.3	LSK(3270.4623)MGESSLR+Incorrect Mono 1Da	696	snf2h	snf2h_negc	1.3	unique	24.2	1.8	adp	2.1
820.068	3	-0.3	Z20170518-39_filtered	39.26	1	TEQEE(690.4065)DEELLTESSK+Incorrect Mono 1Da	152	snf2h	snf2h_auton	31.3	K(1747.7636)TIGYK+Incorrect Mono 1Da	796	snf2h	snf2h_hand	6.6	unique	23.3	1.8	adp	3.2
730.725	3	0.1	Z20170518-39_filtered	53.141	1	K(872.5008)ANYAVDAYFR	741	snf2h	snf2h_hand	39	LFELLE(1298.6408)K	788	snf2h	snf2h_hand	16.4	unique	19	1.8	adp	3
525.507	5	0.6	Z20170518-38_filtered	57.613	1	IAFTE(1136.6991)WIEPPKR	731	snf2h	snf2h4	35.1	MVVLDK(1467.7874)LLPK	492	snf2h	snf2h_reca2	15.6	unique	23.8	1.8	adp	2
563.649	3	0.1	Z20170518-40_filtered	32.114	1	YK(528.2908)APFHQLR+Incorrect Mono 1Da	931	snf2h	snf2h_slide	21.9	ALD(1140.6192)TK+Incorrect Mono 1Da	924	snf2h	snf2h_slide	-1.6	unique	29.1	1.8	adp	5
673.832	4	-0.3	Z20170518-39_filtered	63.735	1	VLDILED(1079.5553)YC(Carbamidomethyl)MWR	519	snf2h	snf2h_reca2	40.1	FDWFLK(1593.7320)SR	992	snf2h	snf2h_slide	15.4	unique	20.9	1.8	adp	1.5
488.485	5	0.7	Z20170518-38_filtered	43.368	1	LFELLE(1546.8766)K	788	snf2h	snf2h_hand	23.3	TPTSPLK(872.5008)MKPGRPR	121	snf2h	snf2h_auton	19.8	unique	27.7	1.8	adp	2
892.464	4	0.5	Z20170518-38_filtered	71.873	1	GLNWLISLYENGINGILADE(876.4454)MGLGK	208	snf2h	snf2h_reca1	69.3	EFK(2671.3680)TTNR	330	snf2h	snf2h_reca1	4.5	unique	13	1.8	adp	2.5
784.812	5	0	Z20170518-37_filtered	48.31	1	TVTAM(Oxidation)D(1399.7208)VVYALKRQGRTLYGFGG+Incorrect Mono 1Da	85	h4	h4	9.8	DAVTYTEHAK(2500.2897)RK+Incorrect Mono 1Da	77	h4	h4	6	unique	31.9	1.8	adp	10.3
1117.29	4	-1	Z20170518-37_filtered	59.554	1	GGPEGVAAQAVASAASAGPADAE(1191.6434)MEEIFDDASPGK+Incorrect Mono 1Da	59	snf2h	snf2h1	40.5	IYVGLSK(3254.4674)M(Oxidation)QR+Incorrect Mono 1Da	420	snf2h	snf2h_reca2	-0.1	unique	27	1.8	adp	2.1
758.046	3	-2.4	Z20170518-39_filtered	35.021	1	QDSINAYNE(690.4065)PNSTK+Incorrect Mono 1Da	549	snf2h	snf2h_reca2	18.1	K(1561.7009)TIGYK+Incorrect Mono 1Da	796	snf2h	snf2h_hand	3.8	unique	21.2	1.8	adp	3
670.379	6	1.6	Z20170518-37_filtered	58.012	1	TIGYK(1822.0393)VPRNPELPNAAQAQK	801	snf2h	snf2h_hand	55.2	LFELLE(2176.1753)KEILFYRK	788	snf2h	snf2h_hand	23.5	positional variants	20.8	1.8	adp	11.1
1131.39	6	-1	Z20170518-37_filtered	68.399	1	3435.7021-GSMSSAAEPPPPPPPESAPSKPAASIASGGSNSSNK+Incorrect Mono 1Da	1	snf2h	snf2h1	54.1	FQSSAVM(Oxidation)ALQEASEAYLVALFED(3327.5677)TNLAAIHAK+Incorrect Mono 1Da	106	h3	h3	18.1	positional variants	25.1	1.8	adp	1.3
671.584	4	0.7	Z20170518-39_filtered	46.858	1	ESEITD(948.5029)EDIDGILER+Incorrect Mono 1Da	673	snf2h	snf2h_negc	31.9	ISYGTNK(1714.7897)GK+Incorrect Mono 1Da	945	snf2h	snf2h_slide	0.6	positional variants	27.7	1.8	adp	1.3
671.584	4	0.7	Z20170518-39_filtered	46.858	1	ESEITDE(948.5029)DIDGILER+Incorrect Mono 1Da	674	snf2h	snf2h_negc	31.2	ISYGTNK(1714.7897)GK+Incorrect Mono 1Da	945	snf2h	snf2h_slide	0.6	positional variants	27.7	1.8	adp	1.3
674.834	4	0.8	Z20170518-39_filtered	54.778	1	TPEEVIE(841.4195)YSAVFWER	884	snf2h	snf2h_sant	67.8	ANEK(1835.8730)WGR	861	snf2h	snf2h_sant	6.7	unique	12	1.8	adp	2
711.341	4	-0.4	Z20170518-39_filtered	52.365	1	IDEAE(1079.5553)SLNDEELEEK	826	snf2h	snf2h_hand	39.8	FDWFLK(1743.7687)SR	992	snf2h	snf2h_slide	16.1	positional variants	23.9	1.8	adp	2
973.106	3	-0.1	Z20170518-38_filtered	45.464	1	NFTMDTESSVYNFE(612.3595)GEDYR+Incorrect Mono 1Da	717	snf2h	snf2h4	13.9	IK(2284.9219)NEK+Incorrect Mono 1Da	316	snf2h	snf2h_reca1	-0.7	unique	31.6	1.8	adp	2
683.59	4	0.6	Z20170518-39_filtered	53.303	1	TPEEVIE(876.4454)YSAVFWER	884	snf2h	snf2h_sant	53.5	EFK(1835.8730)TTNR	330	snf2h	snf2h_reca1	11.3	unique	16.2	1.8	adp	2
657.657	3	-0.5	Z20170518-39_filtered	32.907	1	ISYGTNK(1002.4328)GK+Incorrect Mono 1Da	945	snf2h	snf2h_slide	4.7	ENME(948.5029)LEEK+Incorrect Mono 1Da	1016	snf2h	snf2h5	4.4	positional variants	26.2	1.8	adp	1.5
487.26	3	-0.1	Z20170518-40_filtered	23.295	1	AK(690.3085)SAPAPK	2	h2b	h2b_tail	27.9	GNYAE(750.4388)R	41	h2a	h2a	16.1	positional variants	24.6	1.8	adp	2.5
847.418	5	0	Z20170518-37_filtered	49.426	1	GGPEGVAAQAVASAASAGPADAEM(Oxidation)E(942.5763)EIFDDASPGK+Incorrect Mono 1Da	61	snf2h	snf2h1	39.8	APK(3270.4623)APRPPK+Incorrect Mono 1Da	763	snf2h	snf2h_hand	0.8	positional variants	32	1.8	adp	1.3
646	3	0	Z20170518-39_filtered	38.108	1	ENMELE(914.5338)EK	1018	snf2h	snf2h5	23.9	TIGYK(1002.4328)VPR	801	snf2h	snf2h_hand	18.8	unique	26.6	1.8	adp	1.5
826.415	6	0.6	Z20170518-37_filtered	60.237	1	FEYLLK(2431.1074)QTELFAHFIQPAAQK	99	snf2h	snf2h_auton	43.4	EIQEPDPTYEEKMQTD(2503.3264)RANR	89	snf2h	snf2h_auton	20.4	positional variants	25.2	1.8	adp	3.7
673.559	4	0	Z20170518-39_filtered	39.539	1	IDEAESLNDEELE(927.4232)EK+Incorrect Mono 1Da	834	snf2h	snf2h_hand	15.9	K(1743.7687)MDGAPDGR+Incorrect Mono 1Da	1038	snf2h	snf2h5	9.1	unique	23.5	1.8	adp	1.5
570.288	4	0.3	Z20170518-39_filtered	43.409	1	ANYAVD(1088.5648)AYFR	747	snf2h	snf2h_hand	38.1	LSK(1170.5458)MGESSLR	696	snf2h	snf2h_negc	22.1	unique	23.6	1.8	adp	3
771.413	3	0.8	Z20170518-39_filtered	58.85	1	C(Carbamidomethyl)NTLITLIE(1079.5553)R	1011	snf2h	snf2h_slide	36.9	FDWFLK(1213.6489)SR	992	snf2h	snf2h_slide	17.2	unique	22.6	1.8	adp	2.3
637.314	3	0.6	Z20170518-39_filtered	33.857	1	NYTEE(854.4974)EDR	952	snf2h	snf2h_slide	32	ALDTK(1036.4098)IGR	926	snf2h	snf2h_slide	19.6	positional variants	24.5	1.8	adp	1.2
618.328	4	1.3	Z20170518-38_filtered	57.794	1	LGFDK(872.5008)ENVYDELR	968	snf2h	snf2h_slide	34	LFELLE(1578.7678)K	788	snf2h	snf2h_hand	20.9	unique	23.5	1.8	adp	2
531.765	4	-0.4	Z20170518-39_filtered	37.182	1	ISGLIYEE(943.4182)TR	53	h4	h4	29.9	K(1161.6030)M(Oxidation)DGAPDGR	1038	snf2h	snf2h5	21.1	unique	26.6	1.8	adp	1.5
466.842	5	0.2	Z20170518-39_filtered	42.842	1	ANYAVD(1140.6192)AYFR	747	snf2h	snf2h_hand	26.1	YK(1170.5458)APFHQLR	931	snf2h	snf2h_slide	24.1	unique	28.8	1.8	adp	2
1103	5	1.5	Z20170518-38_filtered	74.308	1	FQSSAVM(Oxidation)ALQEASE(2056.2408)AYLVALFEDTNLAAIHAK	97	h3	h3	31	VTIAQGGVLPNIQSVLLPK(3435.7021)K	118	h2a	h2a_ctail	15.1	positional variants	20.1	1.8	adp	1.9
847.418	5	0	Z20170518-37_filtered	49.426	1	GGPEGVAAQAVASAASAGPADAEM(Oxidation)EE(942.5763)IFDDASPGK+Incorrect Mono 1Da	62	snf2h	snf2h1	39.2	APK(3270.4623)APRPPK+Incorrect Mono 1Da	763	snf2h	snf2h_hand	0.8	positional variants	32	1.8	adp	1.3
522.547	4	1.4	Z20170518-39_filtered	48.608	1	ALDTK(1213.6489)IGR	926	snf2h	snf2h_slide	24.4	C(Carbamidomethyl)NTLITLIE(854.4974)R	1011	snf2h	snf2h_slide	21.1	unique	25.9	1.8	adp	3
589.922	5	0.1	Z20170518-38_filtered	53.33	1	IAFTE(1458.7732)WIEPPKR	731	snf2h	snf2h4	29	LLTQGFTNWNK(1467.7874)R	849	snf2h	snf2h_sant	21.2	unique	23.1	1.8	adp	3
565.998	3	0.6	Z20170518-39_filtered	38.746	1	IGQTK(793.4374)TVR	602	snf2h	snf2h_reca2	32.7	FE(883.5240)YLLK	95	snf2h	snf2h_auton	13.4	unique	21.9	1.8	adp	2
626.302	4	0.1	Z20170518-39_filtered	33.386	1	NPE(1221.5262)LPNAAQAQK	807	snf2h	snf2h_hand	21	GK(1261.6415)NYTEEEDR	947	snf2h	snf2h_slide	20.6	unique	25.9	1.8	adp	3
832.422	3	-0.4	Z20170518-39_filtered	38.172	1	QDSINAYNE(914.5338)PNSTK	549	snf2h	snf2h_reca2	39.2	TIGYK(1561.7009)VPR	801	snf2h	snf2h_hand	11.4	unique	17.8	1.8	adp	3
637.649	3	-0.1	Z20170518-39_filtered	32.403	1	LSK(803.3484)MGESSLR	696	snf2h	snf2h_negc	42	TAEMNE(1088.5648)K	692	snf2h	snf2h_negc	27.9	unique	16.8	1.8	adp	11.5
562.795	4	-1.5	Z20170518-40_filtered	49.068	1	IAFTEWIEPPK(760.3538)R+Incorrect Mono 1Da	737	snf2h	snf2h_hand	6	MGE(1467.7874)SSLR+Incorrect Mono 1Da	699	snf2h	snf2h_negc	0.9	unique	26.7	1.8	adp	6
496.532	4	-0.5	Z20170518-39_filtered	42.142	1	C(Carbamidomethyl)NTLITLIE(750.4388)R	1011	snf2h	snf2h_slide	20.1	AK(1213.6489)SAPAPK	2	h2b	h2b_tail	16.6	positional variants	23	1.8	adp	1.5
774.033	3	-3.2	Z20170518-39_filtered	37.555	1	E(841.4195)IQEPDPTYEEK+Incorrect Mono 1Da	74	snf2h	snf2h1	35.8	ANEK(1458.6515)WGR+Incorrect Mono 1Da	861	snf2h	snf2h_sant	3.7	unique	18.1	1.8	adp	2
496.532	4	-0.5	Z20170518-39_filtered	42.142	1	C(Carbamidomethyl)NTLITLIE(750.4388)R	1011	snf2h	snf2h_slide	20.1	1213.6489-AKSAPAPK	1	h2b	h2b_tail	13.4	positional variants	23	1.8	adp	1.5
748.058	3	-0.9	Z20170518-39_filtered	41.572	1	K(924.5029)ANYAVDAYFR	741	snf2h	snf2h_hand	38.5	LVD(1298.6408)QNLNK	641	snf2h	snf2h_reca2	17.4	unique	19.9	1.8	adp	2
596.3	3	0.6	Z20170518-40_filtered	37.298	1	DDIE(841.4195)NIAR	868	snf2h	snf2h_sant	37.7	ANEK(926.4458)WGR	861	snf2h	snf2h_sant	27.8	unique	21	1.7	adp	4
720.598	4	0.4	Z20170518-38_filtered	47.974	1	E(1400.6970)IQEPDPTYEEK+Incorrect Mono 1Da	74	snf2h	snf2h1	12.9	DIDILNSAGK(1458.6515)MDK+Incorrect Mono 1Da	442	snf2h	snf2h_reca2	4	positional variants	29.8	1.7	adp	1.5
715.177	6	0.7	Z20170518-37_filtered	54.23	1	NFTMDTESSVYNFEGEDYREK(1467.7874)QK+Incorrect Mono 1Da	724	snf2h	snf2h4	12.2	IAFTE(2798.2130)WIEPPKR+Incorrect Mono 1Da	731	snf2h	snf2h4	9.6	positional variants	30.7	1.7	adp	5.2
638.337	4	-1.4	Z20170518-38_filtered	54.135	1	ILMK(1018.4720)DIDILNSAGK+Incorrect Mono 1Da	432	snf2h	snf2h_reca2	17.9	E(1511.8381)NVYDELR+Incorrect Mono 1Da	969	snf2h	snf2h_slide	16.3	unique	27.3	1.7	adp	2
855.185	4	0.5	Z20170518-38_filtered	61.965	1	TLQTISLLGYMK(1593.7320)HYR	225	snf2h	snf2h_reca1	64.1	VLDILED(1804.9658)YC(Carbamidomethyl)MWR	519	snf2h	snf2h_reca2	13.9	positional variants	17.5	1.7	adp	1.5
1102.53	3	6.6	Z20170518-38_filtered	58.999	1	IDEAESLNDEELEEK(1284.6357)EK+Incorrect Mono 1Da	836	snf2h	snf2h_hand	18.6	KM(Oxidation)DGAPD(2000.9062)GRGRK+Incorrect Mono 1Da	1044	snf2h	snf2h5	-2.3	positional variants	31.6	1.7	adp	1.3
645.138	5	1.3	Z20170518-38_filtered	47.582	1	E(1743.9883)IQEPDPTYEEK	74	snf2h	snf2h1	33.6	LLLPGELAK(1458.6515)HAVSEGTK	105	h2b	h2b_ap	22.8	unique	26.5	1.7	adp	3.5
824.429	3	0.3	Z20170518-39_filtered	51.537	1	EK(892.4443)LLTQGFTNWNK	838	snf2h	snf2h_hand	53.5	D(1559.8096)FNQFIK	851	snf2h	snf2h_sant	12.3	unique	17	1.7	adp	2
654.329	4	0.7	Z20170518-38_filtered	37.495	1	RTEQEEDE(690.4065)ELLTESSK+Incorrect Mono 1Da	154	snf2h	snf2h_auton	25.3	K(1903.8647)TIGYK+Incorrect Mono 1Da	796	snf2h	snf2h_hand	7.6	unique	27.2	1.7	adp	1.2
488.77	4	-0.5	Z20170518-39_filtered	35.011	1	YLVID(836.4756)EAHR	310	snf2h	snf2h_reca1	27	VSEPK(1096.5665)APK	760	snf2h	snf2h_hand	18.8	positional variants	27.2	1.7	adp	1.5
706.122	4	-0.2	Z20170518-38_filtered	53.393	1	DFNQFIK(1467.7874)ANEK	857	snf2h	snf2h_sant	27.4	IAFTE(1334.6619)WIEPPKR	731	snf2h	snf2h4	18.6	unique	26.5	1.7	adp	2
811.402	3	1.8	Z20170518-38_filtered	38.594	1	IDEAESLNDE(668.3970)ELEEK+Incorrect Mono 1Da	831	snf2h	snf2h_hand	17.2	GLGK(1743.7687)GGAK+Incorrect Mono 1Da	12	h4	h4_tail	3.8	positional variants	22.9	1.7	adp	2.5
1032.5	4	0.4	Z20170518-37_filtered	50.205	1	GGPE(836.4756)GVAAQAVASAASAGPADAEM(Oxidation)EEIFDDASPGK+Incorrect Mono 1Da	40	snf2h	snf2h1	55.2	VSEPK(3270.4623)APK+Incorrect Mono 1Da	760	snf2h	snf2h_hand	0.8	unique	21.8	1.7	adp	1.5
824.02	5	0.9	Z20170518-38_filtered	68.51	1	FQSSAVM(Oxidation)ALQEASEAYLVALFE(660.3443)DTNLAAIHAK+Incorrect Mono 1Da	105	h3	h3	41	K(3435.7021)TESSK+Incorrect Mono 1Da	119	h2a	h2a_ctail	-2.3	positional variants	42	1.7	adp	1.5
984.873	5	0.6	Z20170518-37_filtered	60.432	1	GGPEGVAAQAVASAASAGPAD(1645.8424)AEMEEIFDDASPGK+Incorrect Mono 1Da	57	snf2h	snf2h1	42.5	K(3254.4674)DEKQNLLSVGDYR+Incorrect Mono 1Da	131	snf2h	snf2h_auton	5.8	positional variants	23.1	1.7	adp	1.5
586.552	4	-0.6	Z20170518-39_filtered	37.606	1	IYVGLSK(1148.5210)MQR	420	snf2h	snf2h_reca2	27.9	LDGQTPHDE(1175.6485)R	539	snf2h	snf2h_reca2	24.3	unique	23.8	1.7	adp	4
639.145	5	-0.1	Z20170518-38_filtered	46.907	1	APRPPK(924.5029)QPNVQDFQFFPPR+Incorrect Mono 1Da	769	snf2h	snf2h_hand	20.3	LVD(2247.1701)QNLNK+Incorrect Mono 1Da	641	snf2h	snf2h_reca2	5.5	unique	28.1	1.7	adp	4
527.767	4	0.8	Z20170518-39_filtered	39.014	1	ISGLIYE(927.4232)ETR	52	h4	h4	35.8	K(1161.6030)MDGAPDGR	1038	snf2h	snf2h5	20.7	unique	26.1	1.7	adp	2.5
660.34	3	-0.4	Z20170518-39_filtered	33.533	1	K(660.3443)ANYAVDAYFR+Incorrect Mono 1Da	741	snf2h	snf2h_hand	18.1	KTE(1298.6408)SSK+Incorrect Mono 1Da	121	h2a	h2a_ctail	0.5	unique	21.4	1.7	adp	2
670.379	6	1.6	Z20170518-37_filtered	58.012	1	VPRNPE(2384.3508)LPNAAQAQK	807	snf2h	snf2h_hand	49.3	LFELLEKEILFYRK(1613.8638)TIGYK	796	snf2h	snf2h_hand	25.4	positional variants	18.8	1.7	adp	7.5
765.401	3	4	Z20170518-39_filtered	52.107	1	Q(Gln->pyro-Glu)PNVQD(690.4065)FQFFPPR+Incorrect Mono 1Da	775	snf2h	snf2h_hand	21.9	K(1583.7521)TIGYK+Incorrect Mono 1Da	796	snf2h	snf2h_hand	7.6	unique	27	1.7	adp	2
654.731	5	1.1	Z20170518-38_filtered	48.281	1	APRPPK(1002.4328)QPNVQDFQFFPPR+Incorrect Mono 1Da	769	snf2h	snf2h_hand	20.4	E(2247.1701)NMELEEK+Incorrect Mono 1Da	1013	snf2h	snf2h_slide	6.1	unique	25.5	1.7	adp	2
657.696	3	-0.1	Z20170518-39_filtered	57.479	1	FDWFLK(872.5008)SR	992	snf2h	snf2h_slide	27.6	LFE(1079.5553)LLEK	785	snf2h	snf2h_hand	16.8	unique	23.8	1.7	adp	3
397.022	5	1.2	Z20170518-39_filtered	42.799	1	YK(821.4436)APFHQLR	931	snf2h	snf2h_slide	35.6	E(1140.6192)ILFYR	790	snf2h	snf2h_hand	23.1	unique	26.3	1.7	adp	4
487.26	3	-0.1	Z20170518-40_filtered	23.295	1	GNYAE(750.4388)R	41	h2a	h2a	16.1	690.3085-AKSAPAPK	1	h2b	h2b_tail	15.6	positional variants	22.6	1.7	adp	3.5
539.305	6	0.8	Z20170518-37_filtered	52.558	1	IAFTE(1743.9883)WIEPPKR	731	snf2h	snf2h4	26.8	LLLPGELAK(1467.7874)HAVSEGTK	105	h2b	h2b_ap	20.8	unique	27.7	1.7	adp	5
627.336	5	0.5	Z20170518-38_filtered	51.106	1	KDEK(1467.7874)QNLLSVGDYR	134	snf2h	snf2h_auton	25.9	IAFTE(1645.8424)WIEPPKR	731	snf2h	snf2h4	21.6	positional variants	26.1	1.7	adp	1.5
540.771	4	0.1	Z20170518-39_filtered	38.272	1	FED(1088.5648)SPSYVK	172	snf2h	snf2h2	23.6	LSK(1052.4815)MGESSLR	696	snf2h	snf2h_negc	19.2	unique	27.7	1.7	adp	2
582.677	3	0.5	Z20170518-39_filtered	48.021	1	LFELLE(854.4974)K	788	snf2h	snf2h_hand	26.7	ALDTK(872.5008)IGR	926	snf2h	snf2h_slide	16.4	unique	24.9	1.7	adp	2
480.675	5	-0.3	Z20170518-38_filtered	50.337	1	IAFTE(912.5393)WIEPPKR	731	snf2h	snf2h4	27	SK(1467.7874)LSEIVR	321	snf2h	snf2h_reca1	22.1	unique	25.6	1.7	adp	3
462.438	5	0.1	Z20170518-38_filtered	32.718	1	LDGQTPHD(1140.6192)ER	538	snf2h	snf2h_reca2	35.4	YK(1148.5210)APFHQLR	931	snf2h	snf2h_slide	20.6	unique	25.4	1.7	adp	1.5
480.753	4	-0.2	Z20170518-39_filtered	35.376	1	YK(760.3538)APFHQLR	931	snf2h	snf2h_slide	34.2	MGE(1140.6192)SSLR	699	snf2h	snf2h_negc	28.1	unique	25.7	1.7	adp	7
520.037	4	-0.5	Z20170518-39_filtered	37.964	1	K(1161.6030)SAPATGGVK	27	h3	h3_tail	22.3	ISGLIYE(896.5080)ETR	52	h4	h4	20.7	positional variants	27.2	1.6	adp	1.5
547.991	3	0.7	Z20170518-39_filtered	40.741	1	LFELLE(750.4388)K	788	snf2h	snf2h_hand	24.1	AK(872.5008)SAPAPK	2	h2b	h2b_tail	20.1	unique	25.4	1.6	adp	1.5
781.633	4	-0.7	Z20170518-38_filtered	44.486	1	E(1645.8424)IQEPDPTYEEK	74	snf2h	snf2h1	38	K(1458.6515)DEKQNLLSVGDYR	131	snf2h	snf2h_auton	17.1	positional variants	23.4	1.6	adp	1.3
781.633	4	-0.7	Z20170518-38_filtered	44.486	1	E(1645.8424)IQEPDPTYEEK	74	snf2h	snf2h1	38	KDEK(1458.6515)QNLLSVGDYR	134	snf2h	snf2h_auton	17.1	positional variants	23.4	1.6	adp	3.3
708.009	3	1.5	Z20170518-39_filtered	39.13	1	K(803.3484)ANYAVDAYFR+Incorrect Mono 1Da	741	snf2h	snf2h_hand	13.1	TAE(1298.6408)MNEK+Incorrect Mono 1Da	689	snf2h	snf2h_negc	9.2	unique	22.6	1.6	adp	2.5
804.875	4	0.1	Z20170518-38_filtered	53.419	1	NFTMDTESSVYNFE(912.5393)GEDYR	717	snf2h	snf2h4	74.2	SK(2284.9219)LSEIVR	321	snf2h	snf2h_reca1	6.5	unique	14	1.6	adp	1.5
663.696	6	0.6	Z20170518-37_filtered	57.684	1	IVERAEM(Oxidation)K(1606.8104)LRLDSIVIQQGR	626	snf2h	snf2h_reca2	39.4	VFRFITDNTVE(2351.3107)ER	616	snf2h	snf2h_reca2	19.6	positional variants	22	1.6	adp	4.4
663.696	6	0.6	Z20170518-37_filtered	57.684	1	IVERAEM(Oxidation)K(1606.8104)LRLDSIVIQQGR	626	snf2h	snf2h_reca2	39.4	VFRFITDNTVEE(2351.3107)R	617	snf2h	snf2h_reca2	19.6	positional variants	22	1.6	adp	9.4
462.648	5	-0.9	Z20170518-39_filtered	33.252	1	YK(1149.5778)APFHQLR	931	snf2h	snf2h_slide	31.4	QVHPD(1140.6192)TGISSK	48	h2b	h2b	20.7	unique	24	1.6	adp	7
670.379	6	1.6	Z20170518-37_filtered	58.012	1	TIGYK(1822.0393)VPRNPELPNAAQAQK	801	snf2h	snf2h_hand	55.2	LFELLEKE(2176.1753)ILFYRK	790	snf2h	snf2h_hand	20.3	positional variants	18.8	1.6	adp	9.6
752.794	5	2	Z20170518-38_filtered	55.249	1	YLVIDE(2643.3454)AHR+Incorrect Mono 1Da	311	snf2h	snf2h_reca1	13.2	NIPGPHMVLVPK(1096.5665)STLHNWMSEFK+Incorrect Mono 1Da	240	snf2h	snf2h_reca1	11.8	unique	28.1	1.6	adp	2
720.373	3	-0.4	Z20170518-39_filtered	44.416	1	K(841.4480)ANYAVDAYFR	741	snf2h	snf2h_hand	37.6	IMAQIE(1298.6408)R	907	snf2h	snf2h_slide	16.2	unique	21	1.6	adp	2
708.761	5	0.2	Z20170518-38_filtered	58.916	1	ESEITDE(1804.9658)DIDGILER+Incorrect Mono 1Da	674	snf2h	snf2h_negc	20.4	TLQTISLLGYMK(1714.7897)HYR+Incorrect Mono 1Da	225	snf2h	snf2h_reca1	10.8	positional variants	27.1	1.6	adp	1.8
889.423	3	0.5	Z20170518-38_filtered	45.962	1	ESEITDE(931.4433)DIDGILER+Incorrect Mono 1Da	674	snf2h	snf2h_negc	14.2	K(1714.7897)TAEMNEK+Incorrect Mono 1Da	686	snf2h	snf2h_negc	8	unique	27.2	1.6	adp	1.3
708.761	5	0.2	Z20170518-38_filtered	58.916	1	ESEITD(1804.9658)EDIDGILER+Incorrect Mono 1Da	673	snf2h	snf2h_negc	20.4	TLQTISLLGYMK(1714.7897)HYR+Incorrect Mono 1Da	225	snf2h	snf2h_reca1	10.8	positional variants	27.1	1.6	adp	2.8
938.289	5	0.5	Z20170518-37_filtered	70.209	1	FQSSAVM(Oxidation)ALQE(1231.6925)ASEAYLVALFEDTNLAAIHAK+Incorrect Mono 1Da	94	h3	h3	87.2	YQK(3435.7021)STELLIR+Incorrect Mono 1Da	56	h3	h3	13.2	unique	16.5	1.6	adp	1.5
711.097	4	0.2	Z20170518-39_filtered	48.843	1	IDEAESLNDEELEEK(821.4436)EK	836	snf2h	snf2h_hand	74.2	E(2000.9062)ILFYR	790	snf2h	snf2h_hand	4.5	unique	13	1.6	adp	3
703.614	4	0.5	Z20170518-38_filtered	58.138	1	C(Carbamidomethyl)NTLITLIE(1578.7678)R	1011	snf2h	snf2h_slide	32.6	LGFDK(1213.6489)ENVYDELR	968	snf2h	snf2h_slide	20.5	unique	24.6	1.6	adp	2
1089.27	4	-1.2	Z20170518-38_filtered	65.36	1	GGPEGVAAQAVASAASAGPADAE(1079.5553)MEEIFDDASPGK+Incorrect Mono 1Da	59	snf2h	snf2h1	44.9	FDWFLK(3254.4674)SR+Incorrect Mono 1Da	992	snf2h	snf2h_slide	-0.8	unique	27.5	1.6	adp	2.3
893.111	3	-0.9	Z20170518-38_filtered	43.197	1	IDEAE(914.5338)SLNDEELEEK	826	snf2h	snf2h_hand	37	TIGYK(1743.7687)VPR	801	snf2h	snf2h_hand	16	positional variants	23.2	1.6	adp	1.3
588.329	4	0.4	Z20170518-38_filtered	53.575	1	LLTQGFTNWNK(872.5008)R	849	snf2h	snf2h_sant	50.5	LFE(1458.7732)LLEK	785	snf2h	snf2h_hand	10.8	unique	16.7	1.6	adp	2
545.647	3	0.2	Z20170518-39_filtered	45.611	1	Q(Gln->pyro-Glu)LATK(793.4374)AAR	23	h3	h3_tail	21	FE(822.4712)YLLK	95	snf2h	snf2h_auton	15.9	unique	24.4	1.6	adp	5
1049.23	4	-0.6	Z20170518-38_filtered	50.531	1	NFTMDTESSVYNFE(1888.9643)GEDYR+Incorrect Mono 1Da	717	snf2h	snf2h4	19.4	NPELPNAAQAQK(2284.9219)EEQLK+Incorrect Mono 1Da	816	snf2h	snf2h_hand	17.7	unique	21.7	1.6	adp	1.3
399.84	5	-0.2	Z20170518-39_filtered	34.049	1	D(669.4174)NIQGITKPAIR	24	h4	h4_tail	48	K(1306.7357)QLATK	18	h3	h3_tail	10.6	unique	15.3	1.6	adp	4
767.873	4	-0.1	Z20170518-38_filtered	56.495	1	ESE(1334.6619)ITDEDIDGILER	670	snf2h	snf2h_negc	39.9	DFNQFIK(1714.7897)ANEK	857	snf2h	snf2h_sant	12.8	positional variants	20.9	1.6	adp	1.2
799.124	4	-0.6	Z20170518-38_filtered	40.667	1	QK(1458.6515)EIQEPDPTYEEK+Incorrect Mono 1Da	73	snf2h	snf2h1	49	EIQEPD(1714.8050)PTYEEK+Incorrect Mono 1Da	79	snf2h	snf2h1	23.2	positional variants	16.5	1.6	adp	1.6
614.052	4	0.1	Z20170518-39_filtered	33.839	1	SVC(Carbamidomethyl)LIGDK(1148.5210)EQR	266	snf2h	snf2h_reca1	24.9	LDGQTPHDE(1285.6449)R	539	snf2h	snf2h_reca2	18.8	unique	22.1	1.6	adp	3
1244.08	4	-1.4	Z20170518-37_filtered	52.436	1	1609.7269-GSM(Oxidation)SSAAEPPPPPPPESAPSKPAASIASGGSNSSNK+Incorrect Mono 1Da	1	snf2h	snf2h1	26.8	VLD(3343.5627)ILEDYC(Carbamidomethyl)M(Oxidation)WR+Incorrect Mono 1Da	515	snf2h	snf2h_reca2	15.6	unique	20.2	1.6	adp	2.5
637.314	3	0.6	Z20170518-39_filtered	33.857	1	NYTE(854.4974)EEDR	951	snf2h	snf2h_slide	30.4	ALDTK(1036.4098)IGR	926	snf2h	snf2h_slide	19.6	positional variants	22.9	1.6	adp	1.8
614.327	3	0.2	Z20170518-39_filtered	32.89	1	ISGLIYEE(660.3443)TR	53	h4	h4	56.9	K(1161.6030)TESSK	119	h2a	h2a_ctail	8.5	unique	16.1	1.6	adp	3.8
713.36	5	0.9	Z20170518-37_filtered	52.588	1	HGATHVFASK(793.4374)ESEITDEDIDGILER	667	snf2h	snf2h_negc	80	FE(2750.3148)YLLK	95	snf2h	snf2h_auton	4.5	unique	12.4	1.6	adp	2
1270.1	4	-1.2	Z20170518-37_filtered	50.041	1	GSM(Oxidation)SSAAEPPPPPPPESAPSK(1714.7897)PAASIASGGSNSSNK	21	snf2h	snf2h1	35.4	E(3343.5627)SEITDEDIDGILER	668	snf2h	snf2h_negc	17.1	positional variants	24.1	1.6	adp	1.3
570.787	4	0.7	Z20170518-39_filtered	48.238	1	DFNQFIK(926.4458)ANEK	857	snf2h	snf2h_sant	31.9	D(1334.6619)DIENIAR	865	snf2h	snf2h_sant	16.9	unique	25	1.6	adp	2
628.743	5	-1.4	Z20170518-37_filtered	53.826	1	APRPPK(872.5008)QPNVQDFQFFPPR+Incorrect Mono 1Da	769	snf2h	snf2h_hand	20.9	LFE(2247.1701)LLEK+Incorrect Mono 1Da	785	snf2h	snf2h_hand	3.6	unique	25.1	1.6	adp	7
1050.51	4	-0.1	Z20170518-37_filtered	48.294	1	836.4221-GSM(Oxidation)SSAAEPPPPPPPESAPSKPAASIASGGSNSSNK	1	snf2h	snf2h1	67.2	FD(3343.5627)WFLK	988	snf2h	snf2h_slide	4.5	unique	15.9	1.6	adp	2
702.358	4	1.1	Z20170518-38_filtered	35.319	1	RTEQEEDEE(883.5240)LLTESSK	155	snf2h	snf2h_auton	25.3	IGQTK(1903.8647)TVR	602	snf2h	snf2h_reca2	15.9	unique	20.9	1.6	adp	1.5
532.547	4	0	Z20170518-38_filtered	60.751	1	LFELLEK(413.2023)EILFYR+Incorrect Mono 1Da	789	snf2h	snf2h_hand	28.4	GE(1693.9443)AR+Incorrect Mono 1Da	910	snf2h	snf2h_slide	-1.1	protein variants	22.1	1.6	adp	3
732.384	5	-0.4	Z20170518-38_filtered	50.49	1	QTELFAHFIQPAAQK(1204.5724)TPTSPLK	114	snf2h	snf2h_auton	39	FITD(2434.3009)NTVEER	612	snf2h	snf2h_reca2	13.9	unique	20.2	1.6	adp	2
1103	5	1.5	Z20170518-38_filtered	74.308	1	FQSSAVM(Oxidation)ALQE(2056.2408)ASEAYLVALFEDTNLAAIHAK	94	h3	h3	29.1	VTIAQGGVLPNIQSVLLPK(3435.7021)K	118	h2a	h2a_ctail	15.1	positional variants	18.5	1.6	adp	2.6
945.324	6	0.5	Z20170518-37_filtered	80.831	1	VGAGAPVYLAAVLEYLTAE(2750.3148)ILELAGNAAR+Incorrect Mono 1Da	61	h2a	h2a_ap	22.6	HGATHVFASK(2896.5698)ESEITDEDIDGILER+Incorrect Mono 1Da	667	snf2h	snf2h_negc	13.1	positional variants	15.5	1.6	adp	1.5
632.076	4	-3.1	Z20170518-39_filtered	58.501	1	VLDILED(912.5393)YC(Carbamidomethyl)MWR	519	snf2h	snf2h_reca2	53.2	SK(1593.7320)LSEIVR	321	snf2h	snf2h_reca1	15.8	positional variants	18.6	1.6	adp	8.5
822.66	5	-0.9	Z20170518-37_filtered	81.113	1	VGAGAPVYLAAVLEYLTAE(1192.6816)ILELAGNAAR+Incorrect Mono 1Da	61	h2a	h2a_ap	29.6	ADVEK(2896.5698)SLPPKK+Incorrect Mono 1Da	404	snf2h	snf2h_reca2	-1	unique	22.7	1.6	adp	3.3
759.358	4	-0.8	Z20170518-38_filtered	40.256	1	IDEAESLNDEE(1271.6258)LEEK	832	snf2h	snf2h_hand	46.3	DAVTYTEHAK(1743.7687)R	77	h4	h4	14.7	positional variants	17.6	1.6	adp	1.1
434.039	5	-0.4	Z20170518-39_filtered	34.602	1	FITDNTVE(942.5763)ER	616	snf2h	snf2h_reca2	38.5	APK(1204.5724)APRPPK	763	snf2h	snf2h_hand	16.6	unique	24.5	1.6	adp	5
541.879	5	0.6	Z20170518-38_filtered	37.362	1	IDEAESLNDEE(942.5763)LEEK	832	snf2h	snf2h_hand	63.5	APK(1743.7687)APRPPK	763	snf2h	snf2h_hand	9.2	unique	14.6	1.6	adp	1.3
820.191	4	1.1	Z20170518-38_filtered	55.914	1	Q(Gln->pyro-Glu)TELFAHFIQPAAQK(841.4480)TPTSPLK	114	snf2h	snf2h_auton	71.5	IMAQIE(2417.2743)R	907	snf2h	snf2h_slide	6.1	unique	14.5	1.6	adp	6
642.313	4	-1.6	Z20170518-38_filtered	40.824	1	EIQEPDPTYEE(1088.5648)K	84	snf2h	snf2h_auton	39	LSK(1458.6515)MGESSLR	696	snf2h	snf2h_negc	12.1	unique	20.5	1.6	adp	2
892.656	4	1.4	Z20170518-38_filtered	43.973	1	EIQEPDPTYEEK(1458.6515)MQTDR	85	snf2h	snf2h_auton	51	E(2089.9262)IQEPDPTYEEK	74	snf2h	snf2h1	16.1	unique	18.6	1.6	adp	1.5
455.057	5	0	Z20170518-38_filtered	44.322	1	IAFTE(783.4491)WIEPPKR+Incorrect Mono 1Da	731	snf2h	snf2h4	26.7	IK(1467.7874)ADVEK+Incorrect Mono 1Da	399	snf2h	snf2h_reca1	9.2	unique	25.7	1.6	adp	2
807.598	5	0.7	Z20170518-37_filtered	47.094	1	LVDQNLNK(1743.7687)IGKDEM(Oxidation)LQM(Oxidation)IR	646	snf2h	snf2h_negc	28.9	IDEAESLND(2271.1715)EELEEK	830	snf2h	snf2h_hand	28.8	positional variants	23.8	1.6	adp	1.1
798.405	3	-3	Z20170518-39_filtered	39.334	1	EIQEPD(914.5338)PTYEEK+Incorrect Mono 1Da	79	snf2h	snf2h1	14.7	TIGYK(1458.6515)VPR+Incorrect Mono 1Da	801	snf2h	snf2h_hand	3.1	unique	23.8	1.6	adp	3
648.083	4	0.4	Z20170518-38_filtered	50.497	1	ESEITD(854.4974)EDIDGILER+Incorrect Mono 1Da	673	snf2h	snf2h_negc	30.6	ALDTK(1714.7897)IGR+Incorrect Mono 1Da	926	snf2h	snf2h_slide	8	unique	20.4	1.6	adp	1.5
607.55	4	1	Z20170518-39_filtered	36.343	1	E(948.5029)IQEPDPTYEEK+Incorrect Mono 1Da	74	snf2h	snf2h1	28	ISYGTNK(1458.6515)GK+Incorrect Mono 1Da	945	snf2h	snf2h_slide	0.8	unique	24.2	1.6	adp	3
641.012	3	0.3	Z20170518-40_filtered	55.941	1	E(1079.5553)ILFYR+Incorrect Mono 1Da	790	snf2h	snf2h_hand	9.1	FDWFLK(821.4436)SR+Incorrect Mono 1Da	992	snf2h	snf2h_slide	5.8	unique	24.3	1.6	adp	6
1124.54	4	0.3	Z20170518-37_filtered	40.005	1	1132.5513-GSM(Oxidation)SSAAEPPPPPPPESAPSKPAASIASGGSNSSNK	1	snf2h	snf2h1	56.6	Q(Gln->pyro-Glu)VHPD(3343.5627)TGISSK	48	h2b	h2b	1.2	unique	15.6	1.6	adp	3
818.403	3	0.8	Z20170518-39_filtered	40.237	1	IDE(690.4065)AESLNDEELEEK	824	snf2h	snf2h_hand	69.3	K(1743.7687)TIGYK	796	snf2h	snf2h_hand	9.2	unique	12.7	1.6	adp	2.5
652.58	4	-0.7	Z20170518-39_filtered	47.322	1	LLTQGFTNWNK(1129.5074)R	849	snf2h	snf2h_sant	42.9	C(Carbamidomethyl)NE(1458.7732)LQDIEK	895	snf2h	snf2h_slide	12.7	unique	20.8	1.6	adp	2
418.023	5	0.9	Z20170518-39_filtered	39.894	1	YK(926.4458)APFHQLR	931	snf2h	snf2h_slide	25	DD(1140.6192)IENIAR	866	snf2h	snf2h_sant	22.8	positional variants	24.5	1.6	adp	2
618.333	5	0.7	Z20170518-38_filtered	53.19	1	APRPPK(821.4436)QPNVQDFQFFPPR	769	snf2h	snf2h_hand	54	E(2247.1701)ILFYR	790	snf2h	snf2h_hand	12	unique	16.2	1.6	adp	4
524.464	5	0.4	Z20170518-39_filtered	39.615	1	EIQE(1140.6192)PDPTYEEK	77	snf2h	snf2h1	37	YK(1458.6515)APFHQLR	931	snf2h	snf2h_slide	15.3	unique	23	1.6	adp	2.5
828.829	5	1.8	Z20170518-37_filtered	68.283	1	FQSSAVM(Oxidation)ALQEASEAYLVALFED(685.3871)TNLAAIHAK	106	h3	h3	106.7	TK(3435.7021)QTAR	4	h3	h3_tail	1.4	positional variants	9.5	1.5	adp	1.5
644.483	6	0.9	Z20170518-37_filtered	61.065	1	GKNYTEEEDRFLIC(Carbamidomethyl)MLHK(1018.4720)LGFDK	963	snf2h	snf2h_slide	49.9	E(2824.3677)NVYDELR	969	snf2h	snf2h_slide	13.2	unique	20.8	1.5	adp	9.5
630.054	4	0.1	Z20170518-38_filtered	36.617	1	IDEAE(754.4086)SLNDEELEEK	826	snf2h	snf2h_hand	60.2	STGGK(1743.7687)APR	14	h3	h3_tail	5.2	unique	13.7	1.5	adp	3
526.008	4	1.9	Z20170518-39_filtered	49.585	1	FDWFLK(1002.4328)SR	992	snf2h	snf2h_slide	29.1	E(1079.5553)NMELEEK	1013	snf2h	snf2h_slide	14.7	unique	23.2	1.5	adp	2.3
811.402	3	1.8	Z20170518-38_filtered	38.594	1	IDEAE(668.3970)SLNDEELEEK+Incorrect Mono 1Da	826	snf2h	snf2h_hand	25.5	GLGK(1743.7687)GGAK+Incorrect Mono 1Da	12	h4	h4_tail	3.8	positional variants	23.5	1.5	adp	1.3
663.696	6	0.6	Z20170518-37_filtered	57.684	1	AEM(Oxidation)K(2104.1065)LRLDSIVIQQGR	626	snf2h	snf2h_reca2	37.7	VFRFITDNTVEERIVE(1854.0146)R	621	snf2h	snf2h_reca2	20.5	positional variants	20.4	1.5	adp	7.2
913.944	4	-0.3	Z20170518-38_filtered	45.331	1	NPELPNAAQAQK(1743.7687)EEQLK+Incorrect Mono 1Da	816	snf2h	snf2h_hand	24.8	IDEAE(1888.9643)SLNDEELEEK+Incorrect Mono 1Da	826	snf2h	snf2h_hand	22.4	positional variants	19.4	1.5	adp	1.3
575.516	5	0.8	Z20170518-37_filtered	40.389	1	VFRFITD(1247.7211)NTVEER	612	snf2h	snf2h_reca2	48.1	AHRIGQTK(1606.8104)TVR	602	snf2h	snf2h_reca2	25.9	unique	20.9	1.5	adp	20
721.382	3	0.5	Z20170518-39_filtered	60.737	1	TVTAMDVVYALK(695.3279)R	91	h4	h4	37.2	TLYGFGG-1447.7857	102	h4	h4	2.1	unique	16.8	1.5	adp	6
756.918	4	0.4	Z20170518-38_filtered	67.432	1	LFELLEK(1311.6863)EILFYR	789	snf2h	snf2h_hand	24.9	IAFTE(1693.9443)WIEPPK	731	snf2h	snf2h4	17.1	unique	22.5	1.5	adp	2
960.201	4	-1.9	Z20170518-38_filtered	36.219	1	475.2101-GSM(Oxidation)SSAAEPPPPPPPESAPSKPAASIASGGSNSSNK	1	snf2h	snf2h1	56.9	AE(3343.5627)M(Oxidation)K	624	snf2h	snf2h_reca2	-0.8	unique	13.8	1.5	adp	4
954.031	4	0.6	Z20170518-38_filtered	82.93	1	VGAGAPVYLAAVLEYLTAE(896.5080)ILELAGNAAR+Incorrect Mono 1Da	61	h2a	h2a_ap	36.1	K(2896.5698)SAPATGGVK+Incorrect Mono 1Da	27	h3	h3_tail	4.8	unique	18.6	1.5	adp	4
1327.41	5	-1.9	Z20170518-37_filtered	52.888	1	GGPEGVAAQAVASAASAGPAD(3343.5627)AEM(Oxidation)EEIFDDASPGK	57	snf2h	snf2h1	42.4	GSM(Oxidation)SSAAEPPPPPPPESAPSK(3270.4623)PAASIASGGSNSSNK	21	snf2h	snf2h1	17.1	unique	20.1	1.5	adp	9.6
994.696	5	0.7	Z20170518-37_filtered	59.521	1	M(Oxidation)QTDRANRFEYLLK(1458.6515)QTELFAHFIQPAAQK	99	snf2h	snf2h_auton	27	EIQEPD(3491.7772)PTYEEK	79	snf2h	snf2h1	19.2	unique	25.4	1.5	adp	2.5
1027.98	4	-1	Z20170518-38_filtered	58.766	1	NFTMDTESSVYNFE(1804.9658)GEDYR	717	snf2h	snf2h4	18.5	TLQTISLLGYMK(2284.9219)HYR	225	snf2h	snf2h_reca1	17.6	positional variants	23	1.5	adp	1.2
767.873	4	-0.1	Z20170518-38_filtered	56.495	1	E(1334.6619)SEITDEDIDGILER	668	snf2h	snf2h_negc	38.9	DFNQFIK(1714.7897)ANEK	857	snf2h	snf2h_sant	12.8	positional variants	19.9	1.5	adp	1.2
526.307	3	0.9	Z20170518-39_filtered	38.688	1	LFELLE(685.3871)K	788	snf2h	snf2h_hand	30.8	TK(872.5008)QTAR	4	h3	h3_tail	14.9	unique	23.3	1.5	adp	2
1027.98	4	-1	Z20170518-38_filtered	58.766	1	NFTMDTE(1804.9658)SSVYNFEGEDYR	710	snf2h	snf2h4	18.5	TLQTISLLGYMK(2284.9219)HYR	225	snf2h	snf2h_reca1	17.6	positional variants	23	1.5	adp	1.2
896.223	4	-0.8	Z20170518-38_filtered	57.082	1	QTELFAHFIQPAAQK(1128.5564)TPTSPLK	114	snf2h	snf2h_auton	66.7	Q(Gln->pyro-Glu)NLLSVGD(2434.3009)YR	142	snf2h	snf2h_auton	7.6	unique	14.5	1.5	adp	2
769.679	4	-0.5	Z20170518-38_filtered	56.381	1	LLLPGELAK(1311.6863)HAVSEGTK+Incorrect Mono 1Da	105	h2b	h2b_ap	26.5	IAFTEWIE(1743.9883)PPK+Incorrect Mono 1Da	734	snf2h	snf2h4	11.1	unique	24.1	1.5	adp	4
637.08	4	0.6	Z20170518-39_filtered	53.441	1	TPEEVIE(690.4065)YSAVFWER	884	snf2h	snf2h_sant	41.5	K(1835.8730)TIGYK	796	snf2h	snf2h_hand	8.3	unique	15.9	1.5	adp	2
787.721	3	-1	Z20170518-39_filtered	38.36	1	IDE(597.3598)AESLNDEELEEK+Incorrect Mono 1Da	824	snf2h	snf2h_hand	29.1	GGK(1743.7687)GLGK+Incorrect Mono 1Da	8	h4	h4_tail	0.8	unique	24.6	1.5	adp	3.3
559.65	3	-0.3	Z20170518-39_filtered	38.891	1	VSEPK(821.4436)APK	760	snf2h	snf2h_hand	27.1	E(836.4756)ILFYR	790	snf2h	snf2h_hand	13.9	unique	22.4	1.5	adp	3
664.163	5	0	Z20170518-37_filtered	61.29	1	FEYLLK(793.4374)QTELFAHFIQPAAQK+Incorrect Mono 1Da	99	snf2h	snf2h_auton	60.5	FE(2503.3264)YLLK+Incorrect Mono 1Da	95	snf2h	snf2h_auton	4.8	unique	17.7	1.5	adp	4
483.52	4	-1.4	Z20170518-39_filtered	36.898	1	ISGLIYEE(750.4388)TR	53	h4	h4	39.8	AK(1161.6030)SAPAPK	2	h2b	h2b_tail	12.8	positional variants	20.2	1.5	adp	1.3
506.283	4	0.1	Z20170518-39_filtered	36.518	1	HAVSEGTK(793.4374)AVTK+Incorrect Mono 1Da	113	h2b	h2b_ap	11.6	FE(1208.6513)YLLK+Incorrect Mono 1Da	95	snf2h	snf2h_auton	8.2	unique	27.6	1.5	adp	2
690.595	4	-0.1	Z20170518-38_filtered	35.972	1	RTEQE(836.4756)EDEELLTESSK	151	snf2h	snf2h_auton	36.1	VSEPK(1903.8647)APK	760	snf2h	snf2h_hand	18	positional variants	22.7	1.5	adp	1.6
549.768	4	0.7	Z20170518-39_filtered	35.252	1	NYTEEE(1140.6192)DR	953	snf2h	snf2h_slide	26.4	YK(1036.4098)APFHQLR	931	snf2h	snf2h_slide	21.6	positional variants	27	1.5	adp	3
690.595	4	-0.1	Z20170518-38_filtered	35.972	1	RTEQEE(836.4756)DEELLTESSK	152	snf2h	snf2h_auton	36.1	VSEPK(1903.8647)APK	760	snf2h	snf2h_hand	18	positional variants	22.7	1.5	adp	1.6
976.969	4	0.8	Z20170518-37_filtered	37.234	1	542.2700-GSM(Oxidation)SSAAEPPPPPPPESAPSKPAASIASGGSNSSNK	1	snf2h	snf2h1	70.9	EVE(3343.5627)GK	875	snf2h	snf2h_sant	-2.3	positional variants	19.1	1.5	adp	1.8
939.023	4	1.2	Z20170518-37_filtered	82.937	1	VGAGAPVYLAAVLEYLTAE(836.4756)ILELAGNAAR+Incorrect Mono 1Da	61	h2a	h2a_ap	35.5	VSEPK(2896.5698)APK+Incorrect Mono 1Da	760	snf2h	snf2h_hand	1.2	unique	21.7	1.5	adp	4.5
551.48	5	1.3	Z20170518-38_filtered	53.78	1	VLDILED(1140.6192)YC(Carbamidomethyl)MWR	519	snf2h	snf2h_reca2	46	YK(1593.7320)APFHQLR	931	snf2h	snf2h_slide	17.5	unique	22.8	1.5	adp	3
813.59	5	-0.3	Z20170518-37_filtered	54.339	1	NFTM(Oxidation)DTESSVYNFE(1743.9883)GEDYR	717	snf2h	snf2h4	19.2	LLLPGELAK(2300.9168)HAVSEGTK	105	h2b	h2b_ap	17.4	unique	25.9	1.5	adp	4
743.726	3	1.2	Z20170518-39_filtered	33.697	1	NPE(948.5029)LPNAAQAQK	807	snf2h	snf2h_hand	28.5	ISYGTNK(1261.6415)GK	945	snf2h	snf2h_slide	17.5	unique	21.5	1.5	adp	2
527.268	5	0.2	Z20170518-38_filtered	47.107	1	STLHNWMSEFK(1096.5665)R	251	snf2h	snf2h_reca1	25.3	YLVID(1516.7245)EAHR	310	snf2h	snf2h_reca1	22	unique	22.7	1.5	adp	2.5
798.405	3	-2.2	Z20170518-39_filtered	39.933	1	E(914.5338)IQEPDPTYEEK+Incorrect Mono 1Da	74	snf2h	snf2h1	26.7	TIGYK(1458.6515)VPR+Incorrect Mono 1Da	801	snf2h	snf2h_hand	1.1	unique	22.5	1.5	adp	5.5
583.051	4	1.1	Z20170518-39_filtered	50.519	1	STLHNWMSEFK(793.4374)R	251	snf2h	snf2h_reca1	37.9	FE(1516.7245)YLLK	95	snf2h	snf2h_auton	14.5	unique	22.4	1.5	adp	3
929.261	4	0.3	Z20170518-38_filtered	83.339	1	VGAGAPVYLAAVLEYLTAE(798.4348)ILELAGNAAR	61	h2a	h2a_ap	109.2	LK(2896.5698)EQGSR	498	snf2h	snf2h_reca2	4.5	unique	9.3	1.5	adp	3
739.364	4	1	Z20170518-38_filtered	45.124	1	IDEAESLND(1191.6434)EELEEK	830	snf2h	snf2h_hand	38.8	IYVGLSK(1743.7687)M(Oxidation)QR	420	snf2h	snf2h_reca2	17.4	unique	20.6	1.5	adp	1.2
406.482	4	1.1	Z20170518-39_filtered	50.285	1	LFELLE(731.3867)K	788	snf2h	snf2h_hand	19.2	K(872.5008)FNWR	301	snf2h	snf2h_reca1	16.6	unique	22.4	1.5	adp	3
585.316	3	-0.3	Z20170518-39_filtered	33.019	1	IYVGLSK(542.2700)M(Oxidation)QR+Incorrect Mono 1Da	420	snf2h	snf2h_reca2	2	E(1191.6434)VEGK+Incorrect Mono 1Da	873	snf2h	snf2h_sant	-0.9	unique	27.8	1.5	adp	4.5
632.076	4	-3.1	Z20170518-39_filtered	58.501	1	VLDILE(912.5393)DYC(Carbamidomethyl)MWR	518	snf2h	snf2h_reca2	52	SK(1593.7320)LSEIVR	321	snf2h	snf2h_reca1	15.8	positional variants	18	1.5	adp	1.5
747.129	4	2	Z20170518-38_filtered	44.28	1	IDEAESLNDE(1222.7034)ELEEK	831	snf2h	snf2h_hand	29.6	LVDQNLNK(1743.7687)IGK	646	snf2h	snf2h_negc	17.1	positional variants	22.4	1.5	adp	1.1
613.826	4	-0.1	Z20170518-38_filtered	46.918	1	LGFDKENVYDE(854.4974)LR	974	snf2h	snf2h_slide	40.3	ALDTK(1578.7678)IGR	926	snf2h	snf2h_slide	22.4	unique	21.8	1.5	adp	1.5
532.27	4	1.7	Z20170518-39_filtered	41.607	1	LSK(1018.4720)MGESSLR	696	snf2h	snf2h_negc	28.5	E(1088.5648)NVYDELR	969	snf2h	snf2h_slide	26.1	unique	25.5	1.5	adp	2
496.988	4	0.1	Z20170518-39_filtered	32.3	1	K(1018.4720)TAEM(Oxidation)NEK	686	snf2h	snf2h_negc	23.6	E(947.4382)NVYDELR	969	snf2h	snf2h_slide	18.9	unique	25.4	1.5	adp	3
762.143	4	-1.7	Z20170518-38_filtered	48.501	1	TLQTISLLGYM(Oxidation)K(1204.5724)HYR+Incorrect Mono 1Da	225	snf2h	snf2h_reca1	11.5	FITDNTVEE(1820.9607)R+Incorrect Mono 1Da	617	snf2h	snf2h_reca2	4.1	unique	25.5	1.5	adp	2.2
663.011	6	1.2	Z20170518-37_filtered	66.446	1	FQSSAVM(Oxidation)ALQEASEAYLVALFE(518.3077)DTNLAAIHAK	105	h3	h3	113.2	K(3435.7021)PHR	37	h3	h3_tail	1.6	unique	9.3	1.5	adp	6
546.804	6	0.6	Z20170518-38_filtered	41.988	1	QTE(1546.8766)LFAHFIQPAAQK	102	snf2h	snf2h_auton	41.5	TPTSPLK(1709.8889)MKPGRPR	121	snf2h	snf2h_auton	9.8	unique	18.4	1.5	adp	5
637.727	5	0.4	Z20170518-38_filtered	54.789	1	TLQTISLLGYMK(1360.6234)HYR	225	snf2h	snf2h_reca1	72.5	STLHNWMSE(1804.9658)FK	249	snf2h	snf2h_reca1	7.4	unique	13	1.4	adp	7
1349.61	4	0.2	Z20170518-37_filtered	53.848	1	GGPEGVAAQAVASAASAGPAD(2105.9212)AEM(Oxidation)EEIFDDASPGK	57	snf2h	snf2h1	42.1	EIQEPDPTYEEK(3270.4623)M(Oxidation)QTDR	85	snf2h	snf2h_auton	12.1	positional variants	16	1.4	adp	1.6
658.832	4	-1.3	Z20170518-38_filtered	47.62	1	YLVIDE(1516.7245)AHR	311	snf2h	snf2h_reca1	32.1	STLHNWMSEFK(1096.5665)R	251	snf2h	snf2h_reca1	15.3	unique	17.5	1.4	adp	2.5
515.772	4	-0.4	Z20170518-39_filtered	36.119	1	FITDNTVEE(836.4756)R	617	snf2h	snf2h_reca2	27.1	VSEPK(1204.5724)APK	760	snf2h	snf2h_hand	13.3	unique	17.1	1.4	adp	1.5
663.851	4	1.4	Z20170518-38_filtered	55.981	1	Q(Gln->pyro-Glu)K(926.4458)IAFTEWIEPPKR	726	snf2h	snf2h4	40.1	DDIE(1706.9144)NIAR	868	snf2h	snf2h_sant	18.6	unique	23.4	1.4	adp	1.3
417.634	5	0.8	Z20170518-38_filtered	35.873	1	YK(924.5029)APFHQLR	931	snf2h	snf2h_slide	31.2	LVD(1140.6192)QNLNK	641	snf2h	snf2h_reca2	14.5	unique	19.3	1.4	adp	2
704.096	4	0.2	Z20170518-38_filtered	59.376	1	E(1079.5553)SEITDEDIDGILER	668	snf2h	snf2h_negc	57.3	FDWFLK(1714.7897)SR	992	snf2h	snf2h_slide	5.7	unique	11	1.4	adp	2.5
825.654	5	0	Z20170518-38_filtered	79.863	1	VGAGAPVYLAAVLEYLTAE(1208.6513)ILELAGNAAR	61	h2a	h2a_ap	63	HAVSEGTK(2896.5698)AVTK	113	h2b	h2b_ap	6.3	unique	13	1.4	adp	4
670.342	4	0.3	Z20170518-39_filtered	51.606	1	TPEEVIEYSAVFWE(823.4552)R	891	snf2h	snf2h_sant	48.2	GPK(1835.8730)PSTQK	1031	snf2h	snf2h5	7.7	unique	16.3	1.4	adp	2
587.04	4	-0.7	Z20170518-40_filtered	57.752	1	VLDILE(731.3867)DYC(Carbamidomethyl)MWR+Incorrect Mono 1Da	518	snf2h	snf2h_reca2	21.4	K(1593.7320)FNWR+Incorrect Mono 1Da	301	snf2h	snf2h_reca1	4.5	unique	25.6	1.4	adp	3
678.33	4	-0.2	Z20170518-39_filtered	32.28	1	IDEAE(946.5084)SLNDEELEEK+Incorrect Mono 1Da	826	snf2h	snf2h_hand	29.2	KTESSK(1743.7687)SAK+Incorrect Mono 1Da	124	h2a	h2a_ctail	6.4	unique	18.1	1.4	adp	2
481.535	4	1.8	Z20170518-39_filtered	34.381	1	D(597.3598)NIQGITKPAIR	24	h4	h4_tail	54.7	GGK(1306.7357)GLGK	8	h4	h4_tail	8.4	unique	15.6	1.4	adp	2
838.739	3	0.1	Z20170518-39_filtered	42.465	1	LLTQGFTNWNK(1036.4098)R	849	snf2h	snf2h_sant	58.3	NYTE(1458.7732)EEDR	951	snf2h	snf2h_slide	9.5	positional variants	11.5	1.4	adp	1.3
435.489	4	-0.1	Z20170518-39_filtered	33.367	1	ISGLIYEE(558.3126)TR	53	h4	h4	43.7	K(1161.6030)STGGK	9	h3	h3_tail	10.1	unique	18.6	1.4	adp	3.7
1157.04	4	-1.1	Z20170518-37_filtered	57.378	1	GGPEGVAAQAVASAASAGPADAE(1334.6619)M(Oxidation)EEIFDDASPGK+Incorrect Mono 1Da	59	snf2h	snf2h1	51.1	DFNQFIK(3270.4623)ANEK+Incorrect Mono 1Da	857	snf2h	snf2h_sant	-0.7	positional variants	17.1	1.4	adp	1.8
426.069	6	1.4	Z20170518-38_filtered	38.655	1	QTE(822.4647)LFAHFIQPAAQK	102	snf2h	snf2h_auton	38.6	MK(1709.8889)PGRPR	123	snf2h	snf2h_auton	7.1	unique	15.6	1.4	adp	7
618.988	3	0	Z20170518-39_filtered	34.407	1	FE(783.4491)DSPSYVK	171	snf2h	snf2h2	28.3	IK(1052.4815)ADVEK	399	snf2h	snf2h_reca1	17.7	unique	22.5	1.4	adp	2
721.633	4	0.8	Z20170518-39_filtered	63.787	1	LFELLEK(1170.5458)EILFYR	789	snf2h	snf2h_hand	37.9	ANYAVD(1693.9443)AYFR	747	snf2h	snf2h_hand	17.4	unique	18.4	1.4	adp	2
479.255	4	0.7	Z20170518-39_filtered	38.042	1	FITDNTVE(690.4065)ER	616	snf2h	snf2h_reca2	36.5	K(1204.5724)TIGYK	796	snf2h	snf2h_hand	12	unique	19.6	1.4	adp	1.5
790.109	4	-0.1	Z20170518-38_filtered	43.879	1	NFTM(Oxidation)DTE(836.4756)SSVYNFEGEDYR+Incorrect Mono 1Da	710	snf2h	snf2h4	40.1	VSEPK(2300.9168)APK+Incorrect Mono 1Da	760	snf2h	snf2h_hand	3.2	positional variants	19.6	1.4	adp	1.5
674.876	4	-0.2	Z20170518-38_filtered	56.985	1	TLQTISLLGYMK(872.5008)HYR	225	snf2h	snf2h_reca1	63.2	LFE(1804.9658)LLEK	785	snf2h	snf2h_hand	5.9	unique	13.8	1.4	adp	2
790.109	4	-0.1	Z20170518-38_filtered	43.879	1	NFTM(Oxidation)D(836.4756)TESSVYNFEGEDYR+Incorrect Mono 1Da	708	snf2h	snf2h4	40.1	VSEPK(2300.9168)APK+Incorrect Mono 1Da	760	snf2h	snf2h_hand	3.2	positional variants	19.6	1.4	adp	1.5
549.875	5	0.3	Z20170518-38_filtered	34.516	1	RTEQEEDEELLTE(822.4647)SSK	159	snf2h	snf2h_auton	65.2	MK(1903.8647)PGRPR	123	snf2h	snf2h_auton	6.1	unique	14.6	1.4	adp	2
686.859	4	2.9	Z20170518-38_filtered	56.175	1	Q(Gln->pyro-Glu)K(1018.4720)IAFTEWIEPPKR	726	snf2h	snf2h4	42	E(1706.9144)NVYDELR	969	snf2h	snf2h_slide	19	unique	19.8	1.4	adp	2
643.325	4	-1.3	Z20170518-38_filtered	45.245	1	ESEITDEDID(836.4756)GILER	677	snf2h	snf2h_negc	49	VSEPK(1714.7897)APK	760	snf2h	snf2h_hand	10.8	unique	17.7	1.4	adp	2
547.954	3	0.5	Z20170518-40_filtered	43.789	1	E(1079.5553)VEGK+Incorrect Mono 1Da	873	snf2h	snf2h_sant	0.2	FDWFLK(542.2700)SR+Incorrect Mono 1Da	992	snf2h	snf2h_slide	-1.7	positional variants	30.3	1.4	adp	2
650.571	4	0.5	Z20170518-38_filtered	38.484	1	IDEAE(836.4756)SLNDEELEEK	826	snf2h	snf2h_hand	51.8	VSEPK(1743.7687)APK	760	snf2h	snf2h_hand	12.9	unique	17.6	1.4	adp	4.3
646.314	4	1.3	Z20170518-38_filtered	37.298	1	E(1104.5597)IQEPDPTYEEK	74	snf2h	snf2h1	56.5	LSK(1458.6515)M(Oxidation)GESSLR	696	snf2h	snf2h_negc	9.2	unique	14.2	1.4	adp	3
926.915	4	0.8	Z20170518-38_filtered	56.166	1	NFTMDTE(1400.6970)SSVYNFEGEDYR	710	snf2h	snf2h4	40.9	DIDILNSAGK(2284.9219)MDK	442	snf2h	snf2h_reca2	12.6	unique	19.5	1.4	adp	2
556.565	4	0.7	Z20170518-38_filtered	23.685	1	NPE(942.5763)LPNAAQAQK	807	snf2h	snf2h_hand	44	APK(1261.6415)APRPPK	763	snf2h	snf2h_hand	14.6	unique	20	1.4	adp	3
617.011	3	0.3	Z20170518-39_filtered	38.268	1	ISGLIYEE(668.3970)TR	53	h4	h4	50.5	GLGK(1161.6030)GGAK	12	h4	h4_tail	12.4	unique	16.7	1.4	adp	3
630.601	4	-1.8	Z20170518-38_filtered	38.768	1	SAPATGGVK(1213.6489)KPHR	36	h3	h3_tail	21.6	C(Carbamidomethyl)NTLITLIE(1286.7208)R	1011	snf2h	snf2h_slide	16.4	positional variants	21.9	1.4	adp	1.5
560.3	5	1	Z20170518-38_filtered	48.867	1	TPEEVIE(942.5763)YSAVFWER	884	snf2h	snf2h_sant	59.1	APK(1835.8730)APRPPK	763	snf2h	snf2h_hand	4.5	unique	13	1.4	adp	2
630.601	4	-1.8	Z20170518-38_filtered	38.768	1	SAPATGGVKK(1213.6489)PHR	37	h3	h3_tail	21.6	C(Carbamidomethyl)NTLITLIE(1286.7208)R	1011	snf2h	snf2h_slide	16.4	positional variants	21.9	1.4	adp	1.5
583.044	4	1.1	Z20170518-39_filtered	37.608	1	ANEK(542.2700)WGRDDIENIAR	861	snf2h	snf2h_sant	56	E(1767.8652)VEGK	873	snf2h	snf2h_sant	11.6	unique	14	1.4	adp	4
624.821	4	-0.4	Z20170518-38_filtered	49.593	1	LLTQGFTNWNK(1018.4720)R	849	snf2h	snf2h_sant	36.4	E(1458.7732)NVYDELR	969	snf2h	snf2h_slide	16.8	unique	21.8	1.4	adp	2.5
570.91	5	1	Z20170518-38_filtered	55.357	1	TLQTISLLGYMK(1026.5346)HYR	225	snf2h	snf2h_reca1	35	D(1804.9658)IDILNSAGK	433	snf2h	snf2h_reca2	16.4	unique	24	1.4	adp	1.5
1028.8	4	2.3	Z20170518-37_filtered	64.227	1	DVLLPGE(1743.9883)WDVC(Carbamidomethyl)VTSYEMLIK+Incorrect Mono 1Da	281	snf2h	snf2h_reca1	26.4	LLLPGELAK(2348.1432)HAVSEGTK+Incorrect Mono 1Da	105	h2b	h2b_ap	4.8	unique	23.5	1.4	adp	1.5
401.218	4	-0.4	Z20170518-39_filtered	36.241	1	D(656.3857)DIENIAR	865	snf2h	snf2h_sant	34	K(926.4458)ALDTK	921	snf2h	snf2h_slide	13.8	unique	21.8	1.4	adp	3
694.758	5	1	Z20170518-38_filtered	37.3	1	RTEQEEDE(1546.8766)ELLTESSK	154	snf2h	snf2h_auton	34.3	TPTSPLK(1903.8647)MKPGRPR	121	snf2h	snf2h_auton	17.7	positional variants	18.4	1.4	adp	5.4
694.758	5	1	Z20170518-38_filtered	37.3	1	RTEQEEDE(1546.8766)ELLTESSK	154	snf2h	snf2h_auton	34.3	TPTSPLKMK(1903.8647)PGRPR	123	snf2h	snf2h_auton	17.7	positional variants	18.4	1.4	adp	5.9
731.566	5	-0.8	Z20170518-37_filtered	44.989	1	TEQEED(1887.0214)EELLTESSK	153	snf2h	snf2h_auton	23.8	IK(1747.7636)KDEKQNLLSVGDYR	130	snf2h	snf2h_auton	19.6	positional variants	27.6	1.4	adp	2.1
612.799	4	0.3	Z20170518-38_filtered	35.835	1	IDEAESLNDEE(685.3871)LEEK	832	snf2h	snf2h_hand	72.6	TK(1743.7687)QTAR	4	h3	h3_tail	3.4	positional variants	11.5	1.4	adp	2
692.116	4	0.1	Z20170518-38_filtered	62.715	1	LFELLEK(1052.4815)EILFYR	789	snf2h	snf2h_hand	48.9	FE(1693.9443)DSPSYVK	171	snf2h	snf2h2	10.7	unique	18.6	1.4	adp	2.5
647.356	3	0.4	Z20170518-39_filtered	43.109	1	K(485.2598)TVTAM(Oxidation)DVVYALK	79	h4	h4	68.1	TD(1435.7745)LR	81	h3	h3	-0.7	unique	6.2	1.3	adp	17.5
545.074	5	0.8	Z20170518-38_filtered	38.291	1	QDSINAYNE(1140.6192)PNSTK	549	snf2h	snf2h_reca2	42.3	YK(1561.7009)APFHQLR	931	snf2h	snf2h_slide	14.1	unique	21.1	1.3	adp	3
715.77	5	-1.3	Z20170518-37_filtered	59.054	1	FEYLLK(1052.4815)QTELFAHFIQPAAQK	99	snf2h	snf2h_auton	65.5	FE(2503.3264)DSPSYVK	171	snf2h	snf2h2	10.7	unique	15.5	1.3	adp	4
605.716	5	1.9	Z20170518-38_filtered	37.999	1	EIQEPDPTYE(1546.8766)EK	83	snf2h	snf2h1	36.2	TPTSPLK(1458.6515)MKPGRPR	121	snf2h	snf2h_auton	11.1	positional variants	18.2	1.3	adp	1.5
605.716	5	1.9	Z20170518-38_filtered	37.999	1	EIQEPDPTYEE(1546.8766)K	84	snf2h	snf2h_auton	36.2	TPTSPLK(1458.6515)MKPGRPR	121	snf2h	snf2h_auton	11.1	positional variants	18.2	1.3	adp	2
1045.23	4	-1.6	Z20170518-37_filtered	37.725	1	815.3232-GSM(Oxidation)SSAAEPPPPPPPESAPSKPAASIASGGSNSSNK	1	snf2h	snf2h1	30.6	M(Oxidation)D(3343.5627)GAPDGR	1040	snf2h	snf2h5	4.2	unique	13.7	1.3	adp	7.7
649	3	1.3	Z20170518-39_filtered	40.156	1	K(627.3228)ANYAVDAYFR	741	snf2h	snf2h_hand	51.4	E(1298.6408)EQLK	817	snf2h	snf2h_hand	3.9	unique	12.4	1.3	adp	4
637.329	4	2	Z20170518-39_filtered	42.63	1	LGFDKENVYD(948.5029)ELR	973	snf2h	snf2h_slide	23.1	ISYGTNK(1578.7678)GK	945	snf2h	snf2h_slide	18.8	positional variants	22.6	1.3	adp	1.5
537.292	4	0.1	Z20170518-38_filtered	34.757	1	KE(882.4824)SYAIYVYK	32	h2b	h2b_tail	20.9	LAHYNK(1244.6441)R	82	h2b	h2b	18	unique	23.7	1.3	adp	4
725.1	4	2.9	Z20170518-38_filtered	50.93	1	STLHNWMSE(1516.7245)FK+Incorrect Mono 1Da	249	snf2h	snf2h_reca1	9.2	STLHNWMSEFK(1360.6234)R+Incorrect Mono 1Da	251	snf2h	snf2h_reca1	5.5	unique	26.4	1.3	adp	2
1157.06	4	-0.3	Z20170518-37_filtered	41.176	1	GSM(Oxidation)SSAAEPPPPPPPESAPSK(1261.6415)PAASIASGGSNSSNK+Incorrect Mono 1Da	21	snf2h	snf2h1	16.1	NPE(3343.5627)LPNAAQAQK+Incorrect Mono 1Da	807	snf2h	snf2h_hand	7.1	unique	20.8	1.3	adp	2
631.813	4	-0.1	Z20170518-39_filtered	52.369	1	LGFDK(926.4458)ENVYDELR	968	snf2h	snf2h_slide	29.8	DDIE(1578.7678)NIAR	868	snf2h	snf2h_sant	17.7	unique	23.1	1.3	adp	2
573.288	4	0.3	Z20170518-38_filtered	36.466	1	IDEAE(527.3431)SLNDEELEEK	826	snf2h	snf2h_hand	48	K(1743.7687)AVTK	13	h2b	h2b_tail	7.8	positional variants	9.2	1.3	adp	1.5
599.908	5	0.4	Z20170518-38_filtered	53.566	1	TPE(1140.6192)EVIEYSAVFWER	880	snf2h	snf2h_sant	52	YK(1835.8730)APFHQLR	931	snf2h	snf2h_slide	11.9	positional variants	15.5	1.3	adp	2
710.784	5	1.2	Z20170518-37_filtered	50.926	1	QTELFAHFIQPAAQK(1096.5665)TPTSPLK	114	snf2h	snf2h_auton	30.3	YLVID(2434.3009)EAHR	310	snf2h	snf2h_reca1	12.2	positional variants	19.5	1.3	adp	1.5
647.345	3	-0.4	Z20170518-40_filtered	49.51	1	FDWFLK(841.4480)SR	992	snf2h	snf2h_slide	28.1	IMAQIE(1079.5553)R	907	snf2h	snf2h_slide	16.1	unique	21.4	1.3	adp	4
837.084	3	0.8	Z20170518-39_filtered	42.815	1	SVC(Carbamidomethyl)LIGDK(1204.5724)EQR	266	snf2h	snf2h_reca1	27.1	FITDNTVEE(1285.6449)R	617	snf2h	snf2h_reca2	18.2	unique	21.4	1.3	adp	1.5
713.007	3	1.9	Z20170518-39_filtered	37.9	1	K(819.3433)ANYAVDAYFR	741	snf2h	snf2h_hand	40.9	TAEM(Oxidation)NE(1298.6408)K	692	snf2h	snf2h_negc	9.9	unique	15.2	1.3	adp	2.5
648.083	4	0.4	Z20170518-39_filtered	50.788	1	ESEITDEDID(854.4974)GILER+Incorrect Mono 1Da	677	snf2h	snf2h_negc	9.6	ALDTK(1714.7897)IGR+Incorrect Mono 1Da	926	snf2h	snf2h_slide	4	positional variants	24.9	1.3	adp	1.5
924.95	4	-0.8	Z20170518-38_filtered	51.077	1	HGATHVFASK(926.4458)ESEITDEDIDGILER+Incorrect Mono 1Da	667	snf2h	snf2h_negc	33.5	DDIE(2750.3148)NIAR+Incorrect Mono 1Da	868	snf2h	snf2h_sant	1.1	positional variants	24.7	1.3	adp	1.7
972.474	4	-0.2	Z20170518-38_filtered	38.954	1	540.2908-GSMSSAAEPPPPPPPESAPSKPAASIASGGSNSSNK	1	snf2h	snf2h1	76.3	VSE(3327.5677)PK	758	snf2h	snf2h_hand	-1.7	unique	16.9	1.3	adp	7
623.733	5	-0.4	Z20170518-38_filtered	48.091	1	QTELFAHFIQPAAQK(661.3184)TPTSPLK	114	snf2h	snf2h_auton	63.5	D(2434.3009)YQVR	184	snf2h	snf2h_reca1	3.9	unique	12.3	1.3	adp	4
630.353	3	0.4	Z20170518-39_filtered	33.322	1	D(942.5763)DIENIAR+Incorrect Mono 1Da	865	snf2h	snf2h_sant	8.9	APK(926.4458)APRPPK+Incorrect Mono 1Da	763	snf2h	snf2h_hand	7.6	unique	21.1	1.3	adp	4.5
827.954	4	0.9	Z20170518-37_filtered	61.944	1	Q(Gln->pyro-Glu)TELFAHFIQPAAQK(872.5008)TPTSPLK	114	snf2h	snf2h_auton	75.8	LFE(2417.2743)LLEK	785	snf2h	snf2h_hand	5.2	positional variants	8.5	1.3	adp	1.5
635.323	4	0.4	Z20170518-39_filtered	50.434	1	FITD(1314.6788)NTVEER	612	snf2h	snf2h_reca2	22.6	IGK(1204.5724)DEMLQMIR	649	snf2h	snf2h_negc	19.1	unique	24.5	1.3	adp	2
424.233	6	0.5	Z20170518-38_filtered	40.099	1	LGFDKENVYDE(942.5763)LR	974	snf2h	snf2h_slide	31.1	APK(1578.7678)APRPPK	763	snf2h	snf2h_hand	16.6	unique	25.1	1.3	adp	3.5
737.8	5	0	Z20170518-37_filtered	61.922	1	ANRFEYLLK(821.4436)QTELFAHFIQPAAQK	99	snf2h	snf2h_auton	54.5	E(2844.5075)ILFYR	790	snf2h	snf2h_hand	10.7	unique	16.7	1.3	adp	4
560.292	4	0.1	Z20170518-39_filtered	43.527	1	LLTQGFTNWNK(760.3538)R	849	snf2h	snf2h_sant	43.3	MGE(1458.7732)SSLR	699	snf2h	snf2h_negc	10.3	unique	15.7	1.3	adp	3
614.054	4	-0.2	Z20170518-39_filtered	40.254	1	ID(690.4065)EAESLNDEELEEK	823	snf2h	snf2h_hand	55.5	K(1743.7687)TIGYK	796	snf2h	snf2h_hand	8	positional variants	11.5	1.3	adp	1.5
405.736	6	0.5	Z20170518-38_filtered	41.486	1	APK(1467.7874)APRPPK	763	snf2h	snf2h_hand	19.6	IAFTEWIE(942.5763)PPKR	734	snf2h	snf2h4	17.9	unique	17.6	1.3	adp	4
807.062	3	-0.8	Z20170518-39_filtered	38.958	1	IDEAESLND(656.3857)EELEEK	830	snf2h	snf2h_hand	50.6	K(1743.7687)ALDTK	921	snf2h	snf2h_slide	11.3	positional variants	14.1	1.3	adp	1.5
477.469	5	0.5	Z20170518-38_filtered	43.81	1	K(1467.7874)SAPATGGVK	27	h3	h3_tail	21.4	IAFTE(896.5080)WIEPPKR	731	snf2h	snf2h4	13.4	positional variants	20.5	1.3	adp	2.5
778.06	3	-0.5	Z20170518-39_filtered	39.543	1	E(854.4974)IQEPDPTYEEK	74	snf2h	snf2h1	51.8	ALDTK(1458.6515)IGR	926	snf2h	snf2h_slide	8.5	unique	11.9	1.3	adp	4
608.806	4	-0.3	Z20170518-39_filtered	38.017	1	ID(669.4174)EAESLNDEELEEK	823	snf2h	snf2h_hand	57.9	K(1743.7687)QLATK	18	h3	h3_tail	7.6	positional variants	12.6	1.3	adp	1.3
729.358	3	-0.5	Z20170518-39_filtered	39.84	1	Q(Gln->pyro-Glu)K(469.2649)EIQEPDPTYEEK	73	snf2h	snf2h1	62.2	E(1697.7784)ALR	752	snf2h	snf2h_hand	0.8	unique	9.3	1.3	adp	2
608.806	4	-0.3	Z20170518-39_filtered	38.017	1	IDE(669.4174)AESLNDEELEEK	824	snf2h	snf2h_hand	57.9	K(1743.7687)QLATK	18	h3	h3_tail	7.6	positional variants	12.6	1.3	adp	3.3
671.347	4	0.6	Z20170518-39_filtered	46.636	1	LLTQGFTNWNK(1204.5724)R	849	snf2h	snf2h_sant	39.6	FITD(1458.7732)NTVEER	612	snf2h	snf2h_reca2	14.3	unique	16.9	1.3	adp	1.5
1045.01	4	0.2	Z20170518-38_filtered	42.013	1	829.4116-GSMSSAAEPPPPPPPESAPSKPAASIASGGSNSSNK+Incorrect Mono 1Da	1	snf2h	snf2h1	57.2	TAME(3327.5677)LQR+Incorrect Mono 1Da	998	snf2h	snf2h_slide	3.7	unique	9.3	1.3	adp	3
735.696	3	-1.8	Z20170518-39_filtered	41.799	1	Q(Gln->pyro-Glu)DSINAYNE(640.3809)PNSTK+Incorrect Mono 1Da	549	snf2h	snf2h_reca2	22.1	WGK(1544.6743)LR+Incorrect Mono 1Da	181	snf2h	snf2h2	-2.3	unique	26.4	1.3	adp	3
413.477	4	0.7	Z20170518-39_filtered	21.092	1	HAVSE(822.4647)GTK	110	h2b	h2b_ap	25.4	MK(809.4032)PGRPR	123	snf2h	snf2h_auton	12.3	unique	17.2	1.3	adp	1.5
426.232	4	-0.2	Z20170518-39_filtered	23.95	1	YK(542.2700)APFHQLR	931	snf2h	snf2h_slide	36.1	E(1140.6192)VEGK	873	snf2h	snf2h_sant	11.2	unique	19.7	1.3	adp	2
779.716	3	0.3	Z20170518-39_filtered	48.002	1	K(1018.4720)ANYAVDAYFR+Incorrect Mono 1Da	741	snf2h	snf2h_hand	24.1	E(1298.6408)NVYDELR+Incorrect Mono 1Da	969	snf2h	snf2h_slide	12.3	positional variants	22	1.3	adp	3
1091.27	4	1.8	Z20170518-38_filtered	59.17	1	GGPEGVAAQAVASAASAGPADAEME(1088.5648)EIFDDASPGK	61	snf2h	snf2h1	115.5	LSK(3254.4674)MGESSLR	696	snf2h	snf2h_negc	-2.3	positional variants	6.2	1.2	adp	1.1
655.329	4	1.8	Z20170518-38_filtered	39.481	1	EIQEPD(1140.6192)PTYEEK	79	snf2h	snf2h1	45.7	YK(1458.6515)APFHQLR	931	snf2h	snf2h_slide	11.7	unique	19.2	1.2	adp	2
1091.27	4	1.8	Z20170518-38_filtered	59.17	1	GGPEGVAAQAVASAASAGPADAEMEE(1088.5648)IFDDASPGK	62	snf2h	snf2h1	115.5	LSK(3254.4674)MGESSLR	696	snf2h	snf2h_negc	-2.3	positional variants	6.2	1.2	adp	1.1
760.344	4	0.2	Z20170518-38_filtered	41.067	1	IDEAESLNDEELEEK(1018.4277)EK	836	snf2h	snf2h_hand	70.5	E(2000.9062)NM(Oxidation)ELEEK	1013	snf2h	snf2h_slide	9.2	unique	9.9	1.2	adp	1.2
485.056	5	0.2	Z20170518-39_filtered	34.341	1	APK(1458.6515)APRPPK+Incorrect Mono 1Da	763	snf2h	snf2h_hand	6.1	EIQEPDPTYE(942.5763)EK+Incorrect Mono 1Da	83	snf2h	snf2h1	1.3	positional variants	28.1	1.2	adp	2.3
485.056	5	0.2	Z20170518-39_filtered	34.341	1	APK(1458.6515)APRPPK+Incorrect Mono 1Da	763	snf2h	snf2h_hand	6.1	EIQEPDPTYEE(942.5763)K+Incorrect Mono 1Da	84	snf2h	snf2h_auton	1.3	positional variants	28.1	1.2	adp	1.3
628.348	3	-0.4	Z20170518-39_filtered	39.278	1	DID(836.4756)ILNSAGK+Incorrect Mono 1Da	435	snf2h	snf2h_reca2	13.7	VSEPK(1026.5346)APK+Incorrect Mono 1Da	760	snf2h	snf2h_hand	3.7	unique	23.6	1.2	adp	2
851.448	4	-0.2	Z20170518-38_filtered	50.115	1	TPEEVIE(1546.8766)YSAVFWER+Incorrect Mono 1Da	884	snf2h	snf2h_sant	19.6	TPTSPLKMK(1835.8730)PGRPR+Incorrect Mono 1Da	123	snf2h	snf2h_auton	2.5	positional variants	25.9	1.2	adp	6.5
568.986	3	-0.6	Z20170518-39_filtered	37.377	1	YLVIDE(589.3588)AHR	311	snf2h	snf2h_reca1	45.1	SVFK(1096.5665)K	300	snf2h	snf2h_reca1	8.3	unique	16.8	1.2	adp	3.5
1084.29	4	-0.7	Z20170518-37_filtered	45.685	1	970.5600-GSM(Oxidation)SSAAEPPPPPPPESAPSKPAASIASGGSNSSNK+Incorrect Mono 1Da	1	snf2h	snf2h1	74	VFLE(3343.5627)NVIR+Incorrect Mono 1Da	63	h4	h4	4.6	unique	12.4	1.2	adp	2
515.772	4	0.8	Z20170518-39_filtered	35.541	1	FITDNTVE(836.4756)ER	616	snf2h	snf2h_reca2	23.1	VSEPK(1204.5724)APK	760	snf2h	snf2h_hand	12	unique	15.6	1.2	adp	1.5
523.898	5	0.3	Z20170518-38_filtered	55.923	1	QK(872.5008)IAFTEWIEPPKR	726	snf2h	snf2h4	59.6	LFELLE(1723.9410)K	788	snf2h	snf2h_hand	5.7	unique	10.1	1.2	adp	3
676.759	5	-0.2	Z20170518-37_filtered	51.721	1	QTELFAHFIQPAAQK(926.4458)TPTSPLK	114	snf2h	snf2h_auton	56.4	DDIE(2434.3009)NIAR	868	snf2h	snf2h_sant	5.5	unique	13.9	1.2	adp	1.3
657.333	5	0.5	Z20170518-38_filtered	52.469	1	TLQTISLLGYMK(1458.6515)HYR	225	snf2h	snf2h_reca1	23.4	E(1804.9658)IQEPDPTYEEK	74	snf2h	snf2h1	13.8	unique	19.1	1.2	adp	1.5
617.196	8	0.6	Z20170518-36_filtered	63.037	1	SVFK(2621.2757)KFNWRYLVIDEAHR+Incorrect Mono 1Da	300	snf2h	snf2h_reca1	15.8	DVLLPGEWDVC(Carbamidomethyl)VTSYE(2289.2171)M(Oxidation)LIKEK+Incorrect Mono 1Da	290	snf2h	snf2h_reca1	10.3	positional variants	27	1.2	adp	5.3
582.793	4	0.2	Z20170518-39_filtered	36.657	1	FITD(1104.5597)NTVEER	612	snf2h	snf2h_reca2	29.1	LSK(1204.5724)M(Oxidation)GESSLR	696	snf2h	snf2h_negc	18.6	unique	23.1	1.2	adp	2
655.327	4	-1.4	Z20170518-39_filtered	39.244	1	E(1140.6192)IQEPDPTYEEK	74	snf2h	snf2h1	44.3	YK(1458.6515)APFHQLR	931	snf2h	snf2h_slide	13.2	unique	18.3	1.2	adp	2.5
630.054	4	-0.9	Z20170518-39_filtered	36.54	1	IDEAESLNDEELE(754.4086)EK	834	snf2h	snf2h_hand	58.6	STGGK(1743.7687)APR	14	h3	h3_tail	3	positional variants	11.2	1.2	adp	1.3
612.037	3	0.3	Z20170518-38_filtered	40.167	1	LFELLE(942.5763)K	788	snf2h	snf2h_hand	22.8	APK(872.5008)APRPPK	763	snf2h	snf2h_hand	18.3	unique	20.9	1.2	adp	4
462.44	5	0.4	Z20170518-38_filtered	23.488	1	E(1286.7208)NMELEEK	1013	snf2h	snf2h_slide	18.4	SAPATGGVK(1002.4328)KPHR	36	h3	h3_tail	15.5	unique	24	1.2	adp	1.3
648.083	4	0.4	Z20170518-39_filtered	50.788	1	ESEITDEDIDGILE(854.4974)R+Incorrect Mono 1Da	681	snf2h	snf2h_negc	6.5	ALDTK(1714.7897)IGR+Incorrect Mono 1Da	926	snf2h	snf2h_slide	4	positional variants	24.9	1.2	adp	1.5
962.716	4	0.7	Z20170518-38_filtered	38.202	1	485.2598-GSM(Oxidation)SSAAEPPPPPPPESAPSKPAASIASGGSNSSNK	1	snf2h	snf2h1	56	TD(3343.5627)LR	81	h3	h3	-1.3	unique	18.2	1.2	adp	2
492.466	5	0.3	Z20170518-38_filtered	48.671	1	KDEK(793.4374)QNLLSVGDYR	134	snf2h	snf2h_auton	37.9	FE(1645.8424)YLLK	95	snf2h	snf2h_auton	9.6	positional variants	17	1.2	adp	5
399.636	5	0.3	Z20170518-39_filtered	34.447	1	D(668.3970)NIQGITKPAIR	24	h4	h4_tail	48.5	GLGK(1306.7357)GGAK	12	h4	h4_tail	7.2	unique	10.7	1.2	adp	4
514.472	5	1.4	Z20170518-38_filtered	35.229	1	ENME(1546.8766)LEEK	1016	snf2h	snf2h5	22.1	TPTSPLK(1002.4328)MKPGRPR	121	snf2h	snf2h_auton	14.9	unique	18.1	1.2	adp	1.5
620.647	3	-1.4	Z20170518-40_filtered	46.988	1	FDWFLK(760.3538)SR+Incorrect Mono 1Da	992	snf2h	snf2h_slide	3.5	MGE(1079.5553)SSLR+Incorrect Mono 1Da	699	snf2h	snf2h_negc	1.4	unique	25.2	1.2	adp	2
1179.29	4	-2.1	Z20170518-37_filtered	56.515	1	GGPEGVAAQAVASAASAGPAD(1423.6772)AEM(Oxidation)EEIFDDASPGK+Incorrect Mono 1Da	57	snf2h	snf2h1	57.9	FEDSPSYVK(3270.4623)WGK+Incorrect Mono 1Da	178	snf2h	snf2h2	2.5	positional variants	11.6	1.2	adp	2.3
1010.27	4	0.5	Z20170518-38_filtered	61.584	1	Q(Gln->pyro-Glu)TELFAHFIQPAAQK(1600.7787)TPTSPLK+Incorrect Mono 1Da	114	snf2h	snf2h_auton	16.1	QPNVQD(2417.2743)FQFFPPR+Incorrect Mono 1Da	775	snf2h	snf2h_hand	13.9	unique	21.7	1.2	adp	5
436.428	5	0.5	Z20170518-38_filtered	42.59	1	YK(1018.4720)APFHQLR	931	snf2h	snf2h_slide	26.2	E(1140.6192)NVYDELR	969	snf2h	snf2h_slide	22.6	unique	23.2	1.2	adp	2.5
825.634	5	0.8	Z20170518-37_filtered	68.647	1	FQSSAVM(Oxidation)ALQEASEAYLVALFE(669.4174)DTNLAAIHAK	105	h3	h3	101.8	K(3435.7021)QLATK	18	h3	h3_tail	2.4	positional variants	6.2	1.2	adp	1.5
628.576	4	1.4	Z20170518-39_filtered	53.334	1	TPEEVIE(656.3857)YSAVFWER	884	snf2h	snf2h_sant	43.3	K(1835.8730)ALDTK	921	snf2h	snf2h_slide	5.8	positional variants	13.7	1.2	adp	1.7
657.11	4	1.3	Z20170518-38_filtered	40.569	1	K(1709.8889)SAPATGGVK	27	h3	h3_tail	21.2	QTE(896.5080)LFAHFIQPAAQK	102	snf2h	snf2h_auton	19.8	unique	21.8	1.2	adp	2
698.881	4	2	Z20170518-38_filtered	49.171	1	ILMK(1261.6415)DIDILNSAGK	432	snf2h	snf2h_reca2	29.3	NPE(1511.8381)LPNAAQAQK	807	snf2h	snf2h_hand	24.8	unique	22.3	1.2	adp	3.5
1206.06	4	-1	Z20170518-37_filtered	42.674	1	GSM(Oxidation)SSAAEPPPPPPPESAPSK(1458.6515)PAASIASGGSNSSNK	21	snf2h	snf2h1	50	E(3343.5627)IQEPDPTYEEK	74	snf2h	snf2h1	7.2	positional variants	14.5	1.2	adp	3.3
769.405	3	6.2	Z20170518-39_filtered	48.247	1	QPNVQD(685.3871)FQFFPPR+Incorrect Mono 1Da	775	snf2h	snf2h_hand	17.2	TK(1600.7787)QTAR+Incorrect Mono 1Da	4	h3	h3_tail	-4.5	unique	28.2	1.2	adp	3.5
825.634	5	0.8	Z20170518-37_filtered	68.647	1	FQSSAVM(Oxidation)ALQEASEAYLVALFED(669.4174)TNLAAIHAK	106	h3	h3	101.8	K(3435.7021)QLATK	18	h3	h3_tail	2.4	positional variants	6.2	1.2	adp	1.5
398.219	5	-0.4	Z20170518-39_filtered	36.36	1	QNLLSVGD(822.4647)YR	142	snf2h	snf2h_auton	23.8	MK(1145.5829)PGRPR	123	snf2h	snf2h_auton	18	unique	20.2	1.2	adp	4.5
588.329	4	0.9	Z20170518-39_filtered	54.073	1	LLTQGFTNWNK(872.5008)R	849	snf2h	snf2h_sant	42.1	LFELLE(1458.7732)K	788	snf2h	snf2h_hand	7.2	unique	13.4	1.2	adp	2
424.731	4	0	Z20170518-39_filtered	32.922	1	AK(926.4458)SAPAPK	2	h2b	h2b_tail	20.4	DDIE(750.4388)NIAR	868	snf2h	snf2h_sant	15.5	positional variants	21	1.2	adp	1.5
424.731	4	0	Z20170518-39_filtered	32.922	1	926.4458-AKSAPAPK	1	h2b	h2b_tail	17.2	DDIE(750.4388)NIAR	868	snf2h	snf2h_sant	15.5	positional variants	21	1.2	adp	1.5
811.423	5	1.2	Z20170518-38_filtered	69.211	1	FQSSAVM(Oxidation)ALQEASEAYLVALFE(597.3598)DTNLAAIHAK+Incorrect Mono 1Da	105	h3	h3	20.8	GGK(3435.7021)GLGK+Incorrect Mono 1Da	8	h4	h4_tail	3	unique	24	1.2	adp	2
820.096	3	0.5	Z20170518-39_filtered	54.921	1	Q(Gln->pyro-Glu)PNVQD(854.4974)FQFFPPR+Incorrect Mono 1Da	775	snf2h	snf2h_hand	21.4	ALDTK(1583.7521)IGR+Incorrect Mono 1Da	926	snf2h	snf2h_slide	3.4	unique	22.7	1.2	adp	3
482.275	5	1.2	Z20170518-38_filtered	36.141	1	TPTSPLK(841.4480)MKPGRPR	121	snf2h	snf2h_auton	18.1	IMAQIE(1546.8766)R	907	snf2h	snf2h_slide	13.4	unique	17.6	1.2	adp	5
614.327	3	0.9	Z20170518-39_filtered	32.183	1	ISGLIYE(660.3443)ETR	52	h4	h4	37.2	K(1161.6030)TESSK	119	h2a	h2a_ctail	7.2	unique	12.4	1.2	adp	3.5
697.957	5	0.3	Z20170518-38_filtered	35.408	1	RTEQEEDEE(1562.8715)LLTESSK	155	snf2h	snf2h_auton	30.4	TPTSPLKM(Oxidation)K(1903.8647)PGRPR	123	snf2h	snf2h_auton	19.5	positional variants	22.6	1.2	adp	2.5
697.957	5	0.3	Z20170518-38_filtered	35.408	1	RTEQEEDEE(1562.8715)LLTESSK	155	snf2h	snf2h_auton	30.4	TPTSPLK(1903.8647)M(Oxidation)KPGRPR	121	snf2h	snf2h_auton	19.5	positional variants	22.6	1.2	adp	2.2
539.289	4	0.2	Z20170518-39_filtered	35.785	1	VSEPK(1298.6408)APK	760	snf2h	snf2h_hand	19.9	KANYAVD(836.4756)AYFR	747	snf2h	snf2h_hand	14.5	unique	23	1.2	adp	2
447.997	4	1.6	Z20170518-39_filtered	40.213	1	ISYGTNK(821.4436)GK	945	snf2h	snf2h_slide	16.6	E(948.5029)ILFYR	790	snf2h	snf2h_hand	15.2	unique	23.6	1.2	adp	3
678.681	3	0.3	Z20170518-39_filtered	40.631	1	LSK(926.4458)MGESSLR	696	snf2h	snf2h_negc	30.8	DDIE(1088.5648)NIAR	868	snf2h	snf2h_sant	15.8	unique	20.8	1.2	adp	2
894.738	4	-0.6	Z20170518-38_filtered	82.878	1	VGAGAPVYLAAVLEYLTAE(660.3443)ILELAGNAAR	61	h2a	h2a_ap	83.9	K(2896.5698)TESSK	119	h2a	h2a_ctail	1.4	unique	9.3	1.2	adp	3.2
683.614	4	-0.7	Z20170518-39_filtered	64.768	1	LFELLEK(1018.4720)EILFYR	789	snf2h	snf2h_hand	46.7	E(1693.9443)NVYDELR	969	snf2h	snf2h_slide	13.6	unique	18.6	1.2	adp	1.5
615.046	4	-0.3	Z20170518-39_filtered	33.244	1	QDSINAYNE(876.4454)PNSTK	549	snf2h	snf2h_reca2	46.5	EFK(1561.7009)TTNR	330	snf2h	snf2h_reca1	8.1	unique	15.5	1.2	adp	3
674.877	4	0.2	Z20170518-38_filtered	58.837	1	TLQTISLLGYMK(872.5008)HYR	225	snf2h	snf2h_reca1	62.9	LFELLE(1804.9658)K	788	snf2h	snf2h_hand	3.1	unique	11.3	1.2	adp	6
932.659	4	-0.3	Z20170518-38_filtered	53.573	1	NFTMDTESSVYNFE(1423.6772)GEDYR	717	snf2h	snf2h4	42.5	FEDSPSYVK(2284.9219)WGK	178	snf2h	snf2h2	9.3	unique	16.2	1.2	adp	2.3
767.873	4	-0.2	Z20170518-38_filtered	55.806	1	ESEITD(1334.6619)EDIDGILER	673	snf2h	snf2h_negc	25.1	DFNQFIK(1714.7897)ANEK	857	snf2h	snf2h_sant	12.3	unique	20.4	1.2	adp	1.2
798.9	4	-0.8	Z20170518-38_filtered	55.603	1	ESE(1458.7732)ITDEDIDGILER	670	snf2h	snf2h_negc	50.5	LLTQGFTNWNK(1714.7897)R	849	snf2h	snf2h_sant	11.9	positional variants	10.7	1.1	adp	2.5
641.304	4	0.5	Z20170518-38_filtered	38.871	1	IDEAESLNDEELEEK(542.2700)EK	836	snf2h	snf2h_hand	80	EVE(2000.9062)GK	875	snf2h	snf2h_sant	1.8	positional variants	6.2	1.1	adp	2
645.681	3	-0.2	Z20170518-39_filtered	35.093	1	ISGLIYE(754.4086)ETR	52	h4	h4	40.1	STGGK(1161.6030)APR	14	h3	h3_tail	11.7	unique	14.6	1.1	adp	2.7
886.741	4	1.9	Z20170518-38_filtered	83.178	1	VGAGAPVYLAAVLEYLTAE(627.3453)ILELAGNAAR+Incorrect Mono 1Da	61	h2a	h2a_ap	43.2	QGGK(2896.5698)TR+Incorrect Mono 1Da	9	h2a	h2a_ntail	-2.7	unique	33	1.1	adp	3
541.801	4	-0.8	Z20170518-39_filtered	31.634	1	NPE(883.5240)LPNAAQAQK	807	snf2h	snf2h_hand	27.8	IGQTK(1261.6415)TVR	602	snf2h	snf2h_reca2	14.9	unique	21.5	1.1	adp	2
556.056	4	0.8	Z20170518-39_filtered	50.322	1	IYVGLSK(1026.5346)MQR	420	snf2h	snf2h_reca2	19.2	DID(1175.6485)ILNSAGK	435	snf2h	snf2h_reca2	17	positional variants	24.2	1.1	adp	1.2
1046.76	4	-1.4	Z20170518-37_filtered	46.067	1	GSM(Oxidation)SSAAEPPPPPPPESAPSK(821.4436)PAASIASGGSNSSNK	21	snf2h	snf2h1	49.5	E(3343.5627)ILFYR	790	snf2h	snf2h_hand	8.3	unique	15.5	1.1	adp	2
697.957	5	0.3	Z20170518-38_filtered	35.408	1	RTEQEED(1562.8715)EELLTESSK	153	snf2h	snf2h_auton	29.5	TPTSPLKM(Oxidation)K(1903.8647)PGRPR	123	snf2h	snf2h_auton	19.5	positional variants	21.7	1.1	adp	3.1
531.031	4	0.3	Z20170518-39_filtered	33.466	1	K(1204.5724)SAPATGGVK+Incorrect Mono 1Da	27	h3	h3_tail	12.1	FITD(896.5080)NTVEER+Incorrect Mono 1Da	612	snf2h	snf2h_reca2	10.1	unique	22.7	1.1	adp	2
603.662	3	1.1	Z20170518-40_filtered	33.665	1	ISYGTNK(841.4480)GK	945	snf2h	snf2h_slide	27.4	IMAQIE(948.5029)R	907	snf2h	snf2h_slide	15.1	unique	20.5	1.1	adp	4
548.296	4	1.5	Z20170518-39_filtered	51.801	1	K(872.5008)ANYAVDAYFR	741	snf2h	snf2h_hand	50.1	LFE(1298.6408)LLEK	785	snf2h	snf2h_hand	9.2	unique	12.9	1.1	adp	4
498.019	4	1.7	Z20170518-39_filtered	36.625	1	YK(829.4116)APFHQLR	931	snf2h	snf2h_slide	27.7	TAME(1140.6192)LQR	998	snf2h	snf2h_slide	21.5	unique	22.4	1.1	adp	3
834.981	4	0.8	Z20170518-38_filtered	54.706	1	VTIAQGGVLPNIQSVLLPK(1261.6415)K	118	h2a	h2a_ctail	76.2	NPE(2056.2408)LPNAAQAQK	807	snf2h	snf2h_hand	3.7	unique	5.6	1.1	adp	2
657.738	5	0.9	Z20170518-38_filtered	51.708	1	APRPPK(1018.4720)QPNVQDFQFFPPR	769	snf2h	snf2h_hand	32.6	E(2247.1701)NVYDELR	969	snf2h	snf2h_slide	14.2	unique	18	1.1	adp	2
689.041	3	-1.1	Z20170518-39_filtered	33.011	1	NPE(783.4491)LPNAAQAQK+Incorrect Mono 1Da	807	snf2h	snf2h_hand	22	IK(1261.6415)ADVEK+Incorrect Mono 1Da	399	snf2h	snf2h_reca1	7.3	unique	16.8	1.1	adp	2
731.019	3	-0.6	Z20170518-39_filtered	34.565	1	IDE(427.2543)AESLNDEELEEK+Incorrect Mono 1Da	824	snf2h	snf2h_hand	38.4	GK(1743.7687)GGK+Incorrect Mono 1Da	5	h4	h4_tail	-1.2	unique	20.5	1.1	adp	2
789.737	3	-0.7	Z20170518-39_filtered	41.894	1	FEDSPSYVK(924.5029)WGK	178	snf2h	snf2h2	47	LVD(1423.6772)QNLNK	641	snf2h	snf2h_reca2	10.8	unique	15.5	1.1	adp	2
502.612	6	0.7	Z20170518-38_filtered	46.784	1	TRKESYAIYVYK(1149.5778)VLK	40	h2b	h2b	29.4	QVHPD(1842.0404)TGISSK	48	h2b	h2b	17.6	unique	20	1.1	adp	8
475.872	5	0.7	Z20170518-38_filtered	37.662	1	TPTSPLK(793.4374)M(Oxidation)KPGRPR	121	snf2h	snf2h_auton	39	FE(1562.8715)YLLK	95	snf2h	snf2h_auton	8.8	unique	17.3	1.1	adp	8.5
712.389	3	-1.4	Z20170518-39_filtered	37.174	1	NPE(854.4974)LPNAAQAQK	807	snf2h	snf2h_hand	32.2	ALDTK(1261.6415)IGR	926	snf2h	snf2h_slide	9.4	unique	17.2	1.1	adp	2
693.342	3	0.2	Z20170518-39_filtered	41.727	1	K(760.3538)ANYAVDAYFR	741	snf2h	snf2h_hand	53.5	MGE(1298.6408)SSLR	699	snf2h	snf2h_negc	8.6	unique	8.6	1.1	adp	6
561.299	3	0.6	Z20170518-40_filtered	41.174	1	ANEK(821.4436)WGR	861	snf2h	snf2h_sant	19.9	E(841.4195)ILFYR	790	snf2h	snf2h_hand	17.1	unique	20.9	1.1	adp	2
590.792	4	-0.2	Z20170518-38_filtered	38.735	1	IDEAE(597.3598)SLNDEELEEK	826	snf2h	snf2h_hand	54	GGK(1743.7687)GLGK	8	h4	h4_tail	6.2	positional variants	9.2	1.1	adp	2.6
402.005	5	-0.4	Z20170518-39_filtered	23.091	1	LDGQTPHDE(838.4596)R	539	snf2h	snf2h_reca2	33.9	M(Oxidation)K(1148.5210)PGRPR	123	snf2h	snf2h_auton	9.4	unique	10.9	1.1	adp	6
557.668	3	-1	Z20170518-39_filtered	35.647	1	QLATK(812.4756)AAR	23	h3	h3_tail	22.9	STE(839.4977)LLIR	59	h3	h3	14.7	unique	19.4	1.1	adp	4
453.668	5	0.1	Z20170518-38_filtered	35.056	1	TPTSPLK(697.4123)MKPGRPR+Incorrect Mono 1Da	121	snf2h	snf2h_auton	12.5	LSE(1546.8766)IVR+Incorrect Mono 1Da	324	snf2h	snf2h_reca1	4	positional variants	24.3	1.1	adp	2
465.534	4	0.4	Z20170518-38_filtered	39.727	1	LFELLE(967.5927)K	788	snf2h	snf2h_hand	32.5	KQLATK(872.5008)AAR	23	h3	h3_tail	10.2	unique	18.7	1.1	adp	2.5
953.469	4	-2.2	Z20170518-38_filtered	51.161	1	APRPPK(1544.6743)QPNVQDFQFFPPR	769	snf2h	snf2h_hand	35.1	Q(Gln->pyro-Glu)DSINAYNE(2247.1701)PNSTK	549	snf2h	snf2h_reca2	16.7	unique	18.8	1.1	adp	2
1000.48	4	-0.5	Z20170518-38_filtered	67.121	1	LFELLEK(2284.9219)EILFYR+Incorrect Mono 1Da	789	snf2h	snf2h_hand	21.1	NFTMDTESSVYNFE(1693.9443)GEDYR+Incorrect Mono 1Da	717	snf2h	snf2h4	11.2	positional variants	15.6	1.1	adp	1.8
639.359	4	0.8	Z20170518-38_filtered	62.265	1	LFELLEK(841.4480)EILFYR	789	snf2h	snf2h_hand	45.2	IMAQIE(1693.9443)R	907	snf2h	snf2h_slide	8.8	unique	13.8	1.1	adp	3
516.529	4	0	Z20170518-39_filtered	53.661	1	IAFTEWIE(731.3867)PPK+Incorrect Mono 1Da	734	snf2h	snf2h4	9.1	K(1311.6863)FNWR+Incorrect Mono 1Da	301	snf2h	snf2h_reca1	6.4	unique	24.8	1.1	adp	2
848.882	4	0.4	Z20170518-38_filtered	48.988	1	NFTMD(1088.5648)TESSVYNFEGEDYR	708	snf2h	snf2h4	48.7	LSK(2284.9219)MGESSLR	696	snf2h	snf2h_negc	10.1	positional variants	15.5	1.1	adp	1.5
848.882	4	0.4	Z20170518-38_filtered	48.988	1	NFTMDTE(1088.5648)SSVYNFEGEDYR	710	snf2h	snf2h4	48.7	LSK(2284.9219)MGESSLR	696	snf2h	snf2h_negc	10.1	positional variants	15.5	1.1	adp	2.5
631.832	4	-1	Z20170518-39_filtered	52.191	1	TPEEVIE(669.4174)YSAVFWER	884	snf2h	snf2h_sant	46.8	K(1835.8730)QLATK	18	h3	h3_tail	3.9	unique	12.4	1.1	adp	2
585.827	4	0.8	Z20170518-38_filtered	61.6	1	LFELLEK(627.3228)EILFYR	789	snf2h	snf2h_hand	62.1	E(1693.9443)EQLK	817	snf2h	snf2h_hand	3.9	unique	12.4	1.1	adp	3
853.42	3	0.2	Z20170518-39_filtered	43.312	1	Q(Gln->pyro-Glu)K(841.4480)EIQEPDPTYEEK	73	snf2h	snf2h1	31.9	IMAQIE(1697.7784)R	907	snf2h	snf2h_slide	9.8	unique	18.2	1.1	adp	3
492.466	5	0.3	Z20170518-38_filtered	48.671	1	K(793.4374)DEKQNLLSVGDYR	131	snf2h	snf2h_auton	37.2	FE(1645.8424)YLLK	95	snf2h	snf2h_auton	9.6	positional variants	16.4	1.1	adp	3
1138.64	3	-1	Z20170518-37_filtered	83.314	1	VGAGAPVYLAAVLEYLTAE(497.3074)ILELAGNAAR+Incorrect Mono 1Da	61	h2a	h2a_ap	28.2	GGVK(2896.5698)R+Incorrect Mono 1Da	44	h4	h4	-1.4	unique	27	1.1	adp	3
569.783	4	1.9	Z20170518-39_filtered	32.513	1	E(798.4348)IQEPDPTYEEK	74	snf2h	snf2h1	45.2	LK(1458.6515)EQGSR	498	snf2h	snf2h_reca2	8	unique	15.5	1.1	adp	3.5
623.84	4	-1.3	Z20170518-38_filtered	37.659	1	TPTSPLKMK(926.4458)PGRPR	123	snf2h	snf2h_auton	27	D(1546.8766)DIENIAR	865	snf2h	snf2h_sant	18.6	positional variants	22.8	1.1	adp	2.4
451.64	5	0.4	Z20170518-38_filtered	43.414	1	LGFDKENVYDE(656.3857)LR	974	snf2h	snf2h_slide	27.8	K(1578.7678)ALDTK	921	snf2h	snf2h_slide	13.3	positional variants	21.1	1.1	adp	2
627.355	4	0	Z20170518-38_filtered	65.428	1	LFELLEK(793.4374)EILFYR	789	snf2h	snf2h_hand	72	FE(1693.9443)YLLK	95	snf2h	snf2h_auton	5.5	unique	12.4	1.1	adp	4
623.84	4	-1.3	Z20170518-38_filtered	37.659	1	TPTSPLK(926.4458)MKPGRPR	121	snf2h	snf2h_auton	27	D(1546.8766)DIENIAR	865	snf2h	snf2h_sant	18.6	positional variants	22.8	1.1	adp	2.4
710.784	5	2.1	Z20170518-37_filtered	63.145	1	FEYLLK(1026.5346)QTELFAHFIQPAAQK+Incorrect Mono 1Da	99	snf2h	snf2h_auton	47.8	D(2503.3264)IDILNSAGK+Incorrect Mono 1Da	433	snf2h	snf2h_reca2	15.8	positional variants	18.7	1.1	adp	1.5
708.56	5	-0.4	Z20170518-38_filtered	59.274	1	E(1804.9658)SEITDEDIDGILER	668	snf2h	snf2h_negc	33	TLQTISLLGYMK(1714.7897)HYR	225	snf2h	snf2h_reca1	17.8	positional variants	20	1.1	adp	1.5
709.714	3	-0.2	Z20170518-39_filtered	23.91	1	ISGLIYE(946.5084)ETR	52	h4	h4	40.9	KTESSK(1161.6030)SAK	124	h2a	h2a_ctail	8.5	positional variants	15	1.1	adp	4.8
508.278	5	0.6	Z20170518-38_filtered	52.108	1	K(872.5008)DEKQNLLSVGDYR	131	snf2h	snf2h_auton	32.9	LFELLE(1645.8424)K	788	snf2h	snf2h_hand	5	positional variants	11	1.1	adp	2.8
709.714	3	-0.2	Z20170518-39_filtered	23.91	1	ISGLIYEE(946.5084)TR	53	h4	h4	40.9	KTESSK(1161.6030)SAK	124	h2a	h2a_ctail	8.5	positional variants	15	1.1	adp	1.8
913.943	4	-1.3	Z20170518-39_filtered	44.788	1	NPELPNAAQAQK(1743.7687)EEQLK+Incorrect Mono 1Da	816	snf2h	snf2h_hand	31.7	IDE(1888.9643)AESLNDEELEEK+Incorrect Mono 1Da	824	snf2h	snf2h_hand	16.9	positional variants	13.9	1.1	adp	1.5
708.56	5	-0.4	Z20170518-38_filtered	59.274	1	ESE(1804.9658)ITDEDIDGILER	670	snf2h	snf2h_negc	32.6	TLQTISLLGYMK(1714.7897)HYR	225	snf2h	snf2h_reca1	17.8	positional variants	20	1.1	adp	1.3
508.278	5	0.6	Z20170518-38_filtered	52.108	1	KDEK(872.5008)QNLLSVGDYR	134	snf2h	snf2h_auton	32.9	LFELLE(1645.8424)K	788	snf2h	snf2h_hand	5	positional variants	11	1.1	adp	3.8
737.696	4	1	Z20170518-37_filtered	62.446	1	VTIAQGGVLPNIQSVLLPK(872.5008)K	118	h2a	h2a_ctail	65.2	LFELLE(2056.2408)K	788	snf2h	snf2h_hand	1.6	unique	6.6	1.1	adp	2
568.563	4	0.7	Z20170518-39_filtered	51.115	1	LLTQGFTNWNK(793.4374)R	849	snf2h	snf2h_sant	42	FE(1458.7732)YLLK	95	snf2h	snf2h_auton	7	unique	13.9	1.1	adp	4
616.583	4	0.5	Z20170518-38_filtered	56.093	1	FLIC(Carbamidomethyl)MLHK(841.4480)LGFDK	963	snf2h	snf2h_slide	37.6	IMAQIE(1602.8415)R	907	snf2h	snf2h_slide	10.8	unique	18.4	1.1	adp	4
693.112	4	0.6	Z20170518-39_filtered	54.695	1	TPEEVIE(914.5338)YSAVFWER	884	snf2h	snf2h_sant	44	TIGYK(1835.8730)VPR	801	snf2h	snf2h_hand	13.8	unique	15.6	1.1	adp	2
683.351	4	1.1	Z20170518-38_filtered	36.429	1	IDEAE(967.5927)SLNDEELEEK	826	snf2h	snf2h_hand	67.7	KQLATK(1743.7687)AAR	23	h3	h3_tail	3	positional variants	11.5	1.1	adp	2.3
483.012	4	-0.3	Z20170518-39_filtered	43.736	1	LSK(821.4436)MGESSLR	696	snf2h	snf2h_negc	19	E(1088.5648)ILFYR	790	snf2h	snf2h_hand	16.1	unique	19.2	1.1	adp	3
477.749	4	-0.4	Z20170518-39_filtered	32.856	1	VSEPK(1052.4815)APK	760	snf2h	snf2h_hand	18.9	FED(836.4756)SPSYVK	172	snf2h	snf2h2	17.6	unique	23	1.1	adp	2
505.785	4	0	Z20170518-39_filtered	39.005	1	ISGLIYE(839.4977)ETR	52	h4	h4	31.6	QLATK(1161.6030)AAR	23	h3	h3_tail	9.4	positional variants	11.5	1	adp	5
505.785	4	0	Z20170518-39_filtered	39.005	1	ISGLIYEE(839.4977)TR	53	h4	h4	31.6	QLATK(1161.6030)AAR	23	h3	h3_tail	9.4	positional variants	11.5	1	adp	2
686.341	4	0.5	Z20170518-38_filtered	34.645	1	IDEAE(979.5563)SLNDEELEEK	826	snf2h	snf2h_hand	70	RGPK(1743.7687)PSTQK	1031	snf2h	snf2h5	6	unique	7.8	1	adp	2.8
674.68	3	0.4	Z20170518-39_filtered	33.133	1	FITDNTVE(798.4348)ER	616	snf2h	snf2h_reca2	38.5	LK(1204.5724)EQGSR	498	snf2h	snf2h_reca2	8.6	unique	9.3	1	adp	3.5
635.325	4	3.7	Z20170518-38_filtered	51.715	1	FITDNTVE(1314.6788)ER	616	snf2h	snf2h_reca2	31.3	IGK(1204.5724)DEMLQMIR	649	snf2h	snf2h_negc	15.8	unique	19.2	1	adp	2.3
602.816	4	0	Z20170518-39_filtered	54.493	1	STLHNWMSEFK(872.5008)R	251	snf2h	snf2h_reca1	16.8	LFELLE(1516.7245)K	788	snf2h	snf2h_hand	13.7	unique	20.9	1	adp	3
545.047	4	0.3	Z20170518-39_filtered	23.923	1	K(1261.6415)SAPATGGVK	27	h3	h3_tail	28.9	NPE(896.5080)LPNAAQAQK	807	snf2h	snf2h_hand	15	unique	14.5	1	adp	2
809.971	4	0.3	Z20170518-38_filtered	58.752	1	VTIAQGGVLPNIQSVLLPK(1161.6030)K	118	h2a	h2a_ctail	70.1	ISGLIYE(2056.2408)ETR	52	h4	h4	-0.3	positional variants	5.4	1	adp	1.5
809.971	4	0.3	Z20170518-38_filtered	58.752	1	VTIAQGGVLPNIQSVLLPK(1161.6030)K	118	h2a	h2a_ctail	70.1	ISGLIYEE(2056.2408)TR	53	h4	h4	-0.3	positional variants	5.4	1	adp	1.5
952.439	4	-2.9	Z20170518-37_filtered	47.77	1	HGATHVFASK(1036.4098)ESEITDEDIDGILER+Incorrect Mono 1Da	667	snf2h	snf2h_negc	31.8	NYTE(2750.3148)EEDR+Incorrect Mono 1Da	951	snf2h	snf2h_slide	7.5	positional variants	17.8	1	adp	2.8
797.368	3	0.1	Z20170518-39_filtered	41.908	1	DFNQFIK(1036.4098)ANEK	857	snf2h	snf2h_sant	27.8	NYTE(1334.6619)EEDR	951	snf2h	snf2h_slide	10.8	positional variants	19.3	1	adp	1.8
677.096	4	-0.2	Z20170518-38_filtered	37.265	1	IDEAESLND(942.5763)EELEEK	830	snf2h	snf2h_hand	72.7	APK(1743.7687)APRPPK	763	snf2h	snf2h_hand	3.9	positional variants	9.3	1	adp	1.3
646.74	5	0.3	Z20170518-37_filtered	47.779	1	QTELFAHFIQPAAQK(776.3487)TPTSPLK	114	snf2h	snf2h_auton	44.9	M(Oxidation)GE(2434.3009)SSLR	699	snf2h	snf2h_negc	3.4	unique	9.3	1	adp	3
640.326	3	0	Z20170518-39_filtered	31.172	1	K(1002.4328)SAPATGGVK+Incorrect Mono 1Da	27	h3	h3_tail	14.6	ENMELE(896.5080)EK+Incorrect Mono 1Da	1018	snf2h	snf2h5	2.1	positional variants	16.3	1	adp	2.5
642.6	4	-0.4	Z20170518-38_filtered	53.627	1	Q(Gln->pyro-Glu)K(841.4480)IAFTEWIEPPKR	726	snf2h	snf2h4	38.2	IMAQIE(1706.9144)R	907	snf2h	snf2h_slide	14.4	unique	19.3	1	adp	3
859.878	4	-3.7	Z20170518-38_filtered	48.437	1	NFTMD(1131.5594)TESSVYNFEGEDYR+Incorrect Mono 1Da	708	snf2h	snf2h4	44.6	TAEMNEK(2284.9219)LSK+Incorrect Mono 1Da	693	snf2h	snf2h_negc	2.5	positional variants	14.1	1	adp	2.3
693.112	4	0.4	Z20170518-38_filtered	56.571	1	TPEEVIEYSAVFWE(914.5338)R	891	snf2h	snf2h_sant	37	TIGYK(1835.8730)VPR	801	snf2h	snf2h_hand	8.3	unique	12.8	1	adp	2
620.647	3	-0.7	Z20170518-39_filtered	38.742	1	K(542.2700)ANYAVDAYFR	741	snf2h	snf2h_hand	41.3	E(1298.6408)VEGK	873	snf2h	snf2h_sant	4.5	unique	12.4	1	adp	2
1197.09	4	-0.7	Z20170518-37_filtered	64.422	1	GGPEGVAAQAVASAASAGPADAEME(1511.8381)EIFDDASPGK	61	snf2h	snf2h1	41.9	ILMK(3254.4674)DIDILNSAGK	432	snf2h	snf2h_reca2	4.3	positional variants	9.3	1	adp	1.4
1197.09	4	-0.7	Z20170518-37_filtered	64.422	1	GGPEGVAAQAVASAASAGPADAEMEE(1511.8381)IFDDASPGK	62	snf2h	snf2h1	41.9	ILMK(3254.4674)DIDILNSAGK	432	snf2h	snf2h_reca2	4.3	positional variants	9.3	1	adp	1.1
718.59	4	-1.1	Z20170518-38_filtered	39.127	1	TEQEEDE(1104.5597)ELLTESSK	154	snf2h	snf2h_auton	32.3	LSK(1747.7636)M(Oxidation)GESSLR	696	snf2h	snf2h_negc	10	positional variants	15.5	1	adp	2
584.916	5	0.7	Z20170518-38_filtered	51.367	1	TLQTISLLGYMK(1096.5665)HYR	225	snf2h	snf2h_reca1	50.7	YLVID(1804.9658)EAHR	310	snf2h	snf2h_reca1	7.7	unique	13.1	1	adp	6
626.086	5	-0.7	Z20170518-38_filtered	44.527	1	NFTMDTESSVYNFE(822.4647)GEDYR	717	snf2h	snf2h4	55.3	MK(2284.9219)PGRPR	123	snf2h	snf2h_auton	2.4	unique	10.9	1	adp	1.5
600.65	3	0	Z20170518-40_filtered	33.416	1	EIAQD(948.5029)FK+Incorrect Mono 1Da	77	h3	h3	3.4	ISYGTNK(831.4127)GK+Incorrect Mono 1Da	945	snf2h	snf2h_slide	0.9	unique	23.3	1	adp	3
411.734	4	-0.1	Z20170518-39_filtered	34.105	1	IK(841.4480)ADVEK	399	snf2h	snf2h_reca1	16.3	IMAQIE(783.4491)R	907	snf2h	snf2h_slide	13.3	unique	21.2	1	adp	4
570.326	3	-0.5	Z20170518-39_filtered	37.636	1	K(793.4374)SAPATGGVK	27	h3	h3_tail	36.8	FE(896.5080)YLLK	95	snf2h	snf2h_auton	8.1	unique	13.4	1	adp	4
465.249	5	0.1	Z20170518-39_filtered	38.31	1	STLHNWMSE(942.5763)FK	249	snf2h	snf2h_reca1	26.2	APK(1360.6234)APRPPK	763	snf2h	snf2h_hand	15.4	unique	20.8	1	adp	4
842.08	3	0	Z20170518-39_filtered	51.26	1	ANYAVD(1334.6619)AYFR	747	snf2h	snf2h_hand	23	DFNQFIK(1170.5458)ANEK	857	snf2h	snf2h_sant	14.1	unique	20.8	1	adp	3
425.445	5	0	Z20170518-38_filtered	36.691	1	ISGLIYEE(942.5763)TR	53	h4	h4	40.8	APK(1161.6030)APRPPK	763	snf2h	snf2h_hand	10.8	unique	17.7	1	adp	1.5
527.034	4	0.8	Z20170518-39_filtered	42.383	1	LLTQGFTNWNK(627.3228)R	849	snf2h	snf2h_sant	53.7	E(1458.7732)EQLK	817	snf2h	snf2h_hand	4.2	unique	12.4	1	adp	1.5

## Sheet: ADP-BeFx xlinks
m/z	z	ppm	Fraction	RT	Spectrum	Peptide 1	pep1.xlinked_aa	pep1.accession	pep1.modul	pep1.half_score	Peptide 2	pep2.xlinked_aa	pep2.accession	pep2.modul	pep2.half_score	ambig	scorediff	SVM score	source	spectral counts
809.855	4	3.7	Z20170518-33b_filtered	45.731	1	NFTMDTESSVYNFE(931.4433)GEDYR+Incorrect Mono 1Da	717	snf2h	snf2h4	21.9	K(2284.9219)TAEMNEK+Incorrect Mono 1Da	686	snf2h	snf2h_negc	10.8	unique	83.2	7.8	adpbefx	2
901.651	4	-0.7	Z20170518-33b_filtered	53.897	1	NFTMDTESSVYNFE(1298.6408)GEDYR+Incorrect Mono 1Da	717	snf2h	snf2h4	28.5	K(2284.9219)ANYAVDAYFR+Incorrect Mono 1Da	741	snf2h	snf2h_hand	21.2	unique	79.5	7.7	adpbefx	5.5
1007.96	4	-0.7	Z20170518-33b_filtered	46.327	1	TEQEEDEELLTESSK(1458.6515)ATNVC(Carbamidomethyl)TR+Incorrect Mono 1Da	162	snf2h	snf2h2	36.2	E(2550.1392)IQEPDPTYEEK+Incorrect Mono 1Da	74	snf2h	snf2h1	24	positional variants	75.6	7.6	adpbefx	2.8
1070.2	3	-1.3	Z20170518-33b_filtered	66.603	1	TVTAMDVVYALK(1740.7964)R+Incorrect Mono 1Da	91	h4	h4	10.2	AMSIMNSFVNDVFE(1447.7857)R+Incorrect Mono 1Da	68	h2b	h2b	9.8	unique	78.4	7.6	adpbefx	13
1007.96	4	-0.7	Z20170518-33b_filtered	46.327	1	TEQEEDEELLTESSK(1458.6515)ATNVC(Carbamidomethyl)TR+Incorrect Mono 1Da	162	snf2h	snf2h2	36.2	EIQE(2550.1392)PDPTYEEK+Incorrect Mono 1Da	77	snf2h	snf2h1	19.5	positional variants	75.1	7.5	adpbefx	1.8
818.077	3	-1.2	Z20170518-33a_filtered	40.725	1	EIAQDFK(1115.5247)TDLR+Incorrect Mono 1Da	79	h3	h3	13.5	DAVTYTE(1316.6725)HAK+Incorrect Mono 1Da	74	h4	h4	8.6	unique	75.6	7.1	adpbefx	11
1038.78	4	-0.7	Z20170518-31a_filtered	61.307	1	Q(Gln->pyro-Glu)TELFAHFIQPAAQK(1714.7897)TPTSPLK+Incorrect Mono 1Da	114	snf2h	snf2h_auton	34.5	ESEITDEDID(2417.2743)GILER+Incorrect Mono 1Da	677	snf2h	snf2h_negc	17.9	unique	71.1	7	adpbefx	4
1214.07	4	0	Z20170518-31a_filtered	63.345	1	GGPEGVAAQAVASAASAGPADAE(1578.7678)MEEIFDDASPGK+Incorrect Mono 1Da	59	snf2h	snf2h1	57	LGFDK(3254.4674)ENVYDELR+Incorrect Mono 1Da	968	snf2h	snf2h_slide	13.2	unique	68.2	6.9	adpbefx	2.5
948.479	5	-0.5	Z20170518-31a_filtered	71.129	1	FQSSAVMALQEASEAYLVALFE(1298.6408)DTNLAAIHAK+Incorrect Mono 1Da	105	h3	h3	38.1	K(3419.7071)ANYAVDAYFR+Incorrect Mono 1Da	741	snf2h	snf2h_hand	19.4	unique	74	6.8	adpbefx	3
806.583	5	0.1	Z20170518-33b_filtered	56.55	1	QK(2284.9219)IAFTEWIEPPKR+Incorrect Mono 1Da	726	snf2h	snf2h4	39.9	NFTMDTESSVYNFEGE(1723.9410)DYR+Incorrect Mono 1Da	719	snf2h	snf2h4	30.2	unique	67.9	6.6	adpbefx	4.4
670.593	4	0.6	Z20170518-33a_filtered	51.316	1	TPEEVIEYSAVFWE(823.4552)R+Incorrect Mono 1Da	891	snf2h	snf2h_sant	20.4	GPK(1835.8730)PSTQK+Incorrect Mono 1Da	1031	snf2h	snf2h5	15.5	unique	68.6	6.5	adpbefx	3
925.489	4	-0.6	Z20170518-33b_filtered	54.178	1	Q(Gln->pyro-Glu)TELFAHFIQPAAQK(1261.6415)TPTSPLK+Incorrect Mono 1Da	114	snf2h	snf2h_auton	39.8	NPE(2417.2743)LPNAAQAQK+Incorrect Mono 1Da	807	snf2h	snf2h_hand	28.4	unique	67.7	6.4	adpbefx	10
861.092	6	0.7	Z20170518-31a_filtered	58.331	1	GGPEGVAAQAVASAASAGPADAEMEE(1887.0214)IFDDASPGK+Incorrect Mono 1Da	62	snf2h	snf2h1	39.1	IK(3254.4674)KDEKQNLLSVGDYR+Incorrect Mono 1Da	130	snf2h	snf2h_auton	21.7	positional variants	69.9	6.4	adpbefx	1.8
861.092	6	0.7	Z20170518-31a_filtered	58.331	1	GGPEGVAAQAVASAASAGPADAEMEE(1887.0214)IFDDASPGK+Incorrect Mono 1Da	62	snf2h	snf2h1	39.1	IKK(3254.4674)DEKQNLLSVGDYR+Incorrect Mono 1Da	131	snf2h	snf2h_auton	21.7	positional variants	69.9	6.4	adpbefx	1.2
861.092	6	0.7	Z20170518-31a_filtered	58.331	1	GGPEGVAAQAVASAASAGPADAEMEE(1887.0214)IFDDASPGK+Incorrect Mono 1Da	62	snf2h	snf2h1	39.1	IKKDEK(3254.4674)QNLLSVGDYR+Incorrect Mono 1Da	134	snf2h	snf2h_auton	21.7	positional variants	69.9	6.4	adpbefx	2.4
861.092	6	0.7	Z20170518-31a_filtered	58.331	1	GGPEGVAAQAVASAASAGPADAE(1887.0214)MEEIFDDASPGK+Incorrect Mono 1Da	59	snf2h	snf2h1	39.1	IK(3254.4674)KDEKQNLLSVGDYR+Incorrect Mono 1Da	130	snf2h	snf2h_auton	21.7	positional variants	69.9	6.4	adpbefx	2.9
861.092	6	0.7	Z20170518-31a_filtered	58.331	1	GGPEGVAAQAVASAASAGPADAE(1887.0214)MEEIFDDASPGK+Incorrect Mono 1Da	59	snf2h	snf2h1	39.1	IKK(3254.4674)DEKQNLLSVGDYR+Incorrect Mono 1Da	131	snf2h	snf2h_auton	21.7	positional variants	69.9	6.4	adpbefx	2
1229.39	4	1.8	Z20170518-31a_filtered	63.171	1	DVLLPGEWDVC(Carbamidomethyl)VTSYEMLIKE(2289.2171)K+Incorrect Mono 1Da	295	snf2h	snf2h_reca1	19.9	SVFK(2605.2808)KFNWRYLVIDEAHR+Incorrect Mono 1Da	300	snf2h	snf2h_reca1	16.8	unique	73.2	6.4	adpbefx	63.6
901.649	4	-2.5	Z20170518-33a_filtered	54.214	1	K(2284.9219)ANYAVDAYFR+Incorrect Mono 1Da	741	snf2h	snf2h_hand	21.2	NFTMDTESSVYNFEGE(1298.6408)DYR+Incorrect Mono 1Da	719	snf2h	snf2h4	21.1	unique	70.8	6.4	adpbefx	1.5
1045.77	4	-0.1	Z20170518-31a_filtered	57.053	1	Q(Gln->pyro-Glu)TELFAHFIQPAAQK(1743.7687)TPTSPLK	114	snf2h	snf2h_auton	68.2	IDEAESLND(2417.2743)EELEEK	830	snf2h	snf2h_hand	53.6	unique	57.7	6.3	adpbefx	3.7
1146.53	4	-2.2	Z20170518-31a_filtered	58.825	1	GGPEGVAAQAVASAASAGPADAEMEEIFDDASPGK(1052.4815)QK+Incorrect Mono 1Da	71	snf2h	snf2h1	39.4	FED(3510.6209)SPSYVK+Incorrect Mono 1Da	172	snf2h	snf2h2	-2.3	positional variants	68.2	6.3	adpbefx	1.5
1146.53	4	-2.2	Z20170518-31a_filtered	58.825	1	GGPEGVAAQAVASAASAGPADAEMEEIFDDASPGK(1052.4815)QK+Incorrect Mono 1Da	71	snf2h	snf2h1	39.4	FE(3510.6209)DSPSYVK+Incorrect Mono 1Da	171	snf2h	snf2h2	-2.3	positional variants	68.2	6.3	adpbefx	4.5
1049.89	5	0.1	Z20170518-31a_filtered	63.536	1	GGPEGVAAQAVASAASAGPADAEMEEIFDDASPGK(1714.7897)QK+Incorrect Mono 1Da	71	snf2h	snf2h1	26.5	E(3510.6209)SEITDEDIDGILER+Incorrect Mono 1Da	668	snf2h	snf2h_negc	19.4	positional variants	68.9	6.3	adpbefx	1.4
1049.89	5	0.1	Z20170518-31a_filtered	63.536	1	GGPEGVAAQAVASAASAGPADAEMEEIFDDASPGK(1714.7897)QK+Incorrect Mono 1Da	71	snf2h	snf2h1	26.5	ESE(3510.6209)ITDEDIDGILER+Incorrect Mono 1Da	670	snf2h	snf2h_negc	19.4	positional variants	68.9	6.3	adpbefx	1.4
667.319	4	0.6	Z20170518-33a_filtered	45.519	1	ESEITDEDIDGILE(931.4433)R+Incorrect Mono 1Da	681	snf2h	snf2h_negc	16.6	K(1714.7897)TAEMNEK+Incorrect Mono 1Da	686	snf2h	snf2h_negc	13.2	unique	66.8	6.2	adpbefx	3
1144.04	4	-1.1	Z20170518-31a_filtered	61.666	1	GGPEGVAAQAVASAASAGPADAEME(1298.6408)EIFDDASPGK+Incorrect Mono 1Da	61	snf2h	snf2h1	51.5	K(3254.4674)ANYAVDAYFR+Incorrect Mono 1Da	741	snf2h	snf2h_hand	1.1	positional variants	62.9	6.1	adpbefx	3.8
1144.04	4	-1.1	Z20170518-31a_filtered	61.666	1	GGPEGVAAQAVASAASAGPADAEMEE(1298.6408)IFDDASPGK+Incorrect Mono 1Da	62	snf2h	snf2h1	50.9	K(3254.4674)ANYAVDAYFR+Incorrect Mono 1Da	741	snf2h	snf2h_hand	1.1	positional variants	62.9	6.1	adpbefx	4.8
1081.77	4	-0.9	Z20170518-33b_filtered	62.063	1	GGPEGVAAQAVASAASAGPADAEMEEIFDDASPGK(793.4374)QK+Incorrect Mono 1Da	71	snf2h	snf2h1	39.5	FE(3510.6209)YLLK+Incorrect Mono 1Da	95	snf2h	snf2h_auton	-5.4	unique	78.7	6.1	adpbefx	4
978.791	4	1.4	Z20170518-31a_filtered	66.163	1	VTIAQGGVLPNIQSVLLPK(1835.8730)K+Incorrect Mono 1Da	118	h2a	h2a_ctail	26.5	TPE(2056.2408)EVIEYSAVFWER+Incorrect Mono 1Da	880	snf2h	snf2h_sant	21.6	unique	62.7	6.1	adpbefx	2
753.034	3	-1.8	Z20170518-33a_filtered	41.238	1	STLHNWMSE(876.4454)FK+Incorrect Mono 1Da	249	snf2h	snf2h_reca1	12.3	EFK(1360.6234)TTNR+Incorrect Mono 1Da	330	snf2h	snf2h_reca1	2	unique	68.3	6	adpbefx	2
980.484	3	-0.1	Z20170518-33b_filtered	46.98	1	IDEAESLND(1175.6485)EELEEK+Incorrect Mono 1Da	830	snf2h	snf2h_hand	35.4	IYVGLSK(1743.7687)MQR+Incorrect Mono 1Da	420	snf2h	snf2h_reca2	11.3	unique	60.2	6	adpbefx	1.6
1103.85	6	-2.5	Z20170518-31a_filtered	52.871	1	3270.4623-GSMSSAAEPPPPPPPESAPSKPAASIASGGSNSSNK+Incorrect Mono 1Da	1	snf2h	snf2h1	62.4	GGPEGVAAQAVASAASAGPADAE(3327.5677)M(Oxidation)EEIFDDASPGK+Incorrect Mono 1Da	59	snf2h	snf2h1	55.2	positional variants	61.5	6	adpbefx	10.1
1103.85	6	-2.5	Z20170518-31a_filtered	52.871	1	3270.4623-GSMSSAAEPPPPPPPESAPSKPAASIASGGSNSSNK+Incorrect Mono 1Da	1	snf2h	snf2h1	62.4	GGPEGVAAQAVASAASAGPAD(3327.5677)AEM(Oxidation)EEIFDDASPGK+Incorrect Mono 1Da	57	snf2h	snf2h1	55.2	positional variants	61.5	6	adpbefx	15.9
916.874	5	-1.5	Z20170518-31a_filtered	67.301	1	FQSSAVMALQEASEAYLVALFE(1140.6192)DTNLAAIHAK+Incorrect Mono 1Da	105	h3	h3	43.1	YK(3419.7071)APFHQLR+Incorrect Mono 1Da	931	snf2h	snf2h_slide	2	unique	70.5	5.9	adpbefx	5.5
1296.37	4	1.1	Z20170518-31a_filtered	53.899	1	1835.8730-GSMSSAAEPPPPPPPESAPSKPAASIASGGSNSSNK	1	snf2h	snf2h1	82.2	TPEEVIE(3327.5677)YSAVFWER	884	snf2h	snf2h_sant	35.9	unique	54.6	5.9	adpbefx	18.3
1021.52	3	-1	Z20170518-33a_filtered	59.007	1	Q(Gln->pyro-Glu)PNVQD(1458.7732)FQFFPPR+Incorrect Mono 1Da	775	snf2h	snf2h_hand	19.9	LLTQGFTNWNK(1583.7521)R+Incorrect Mono 1Da	849	snf2h	snf2h_sant	12.3	unique	62.3	5.8	adpbefx	11
870.105	3	-0.4	Z20170518-33a_filtered	46.508	1	LLTQGFTNWNK(1129.5074)R+Incorrect Mono 1Da	849	snf2h	snf2h_sant	13.1	C(Carbamidomethyl)NELQDIE(1458.7732)K+Incorrect Mono 1Da	900	snf2h	snf2h_slide	6.5	unique	62.1	5.8	adpbefx	2
1424.44	4	3.2	Z20170518-31a_filtered	60.717	1	2348.1432-GSMSSAAEPPPPPPPESAPSKPAASIASGGSNSSNK	1	snf2h	snf2h1	74	DVLLPGE(3327.5677)WDVC(Carbamidomethyl)VTSYEMLIK	281	snf2h	snf2h_reca1	47.9	unique	58.1	5.8	adpbefx	7
1050.28	4	1.3	Z20170518-33b_filtered	51.563	1	QTELFAHFIQPAAQK(1743.7687)TPTSPLK+Incorrect Mono 1Da	114	snf2h	snf2h_auton	32.9	IDEAE(2434.3009)SLNDEELEEK+Incorrect Mono 1Da	826	snf2h	snf2h_hand	26.2	positional variants	60.4	5.7	adpbefx	3
702.938	7	0.4	Z20170518-33b_filtered	63.398	1	SVFKK(2605.2808)FNWRYLVIDEAHR+Incorrect Mono 1Da	301	snf2h	snf2h_reca1	12.8	DVLLPGEWDVC(Carbamidomethyl)VTSYEMLIKE(2289.2171)K+Incorrect Mono 1Da	295	snf2h	snf2h_reca1	11.7	positional variants	68.9	5.7	adpbefx	9.5
1156.81	4	-0.3	Z20170518-31a_filtered	40.375	1	1261.6415-GSM(Oxidation)SSAAEPPPPPPPESAPSKPAASIASGGSNSSNK	1	snf2h	snf2h1	77.2	NPE(3343.5627)LPNAAQAQK	807	snf2h	snf2h_hand	25.3	unique	54.5	5.7	adpbefx	17
1324.41	5	-2.9	Z20170518-31a_filtered	52.354	1	3270.4623-GSMSSAAEPPPPPPPESAPSKPAASIASGGSNSSNK+Incorrect Mono 1Da	1	snf2h	snf2h1	64.6	GGPE(3327.5677)GVAAQAVASAASAGPADAEM(Oxidation)EEIFDDASPGK+Incorrect Mono 1Da	40	snf2h	snf2h1	60.2	unique	62.4	5.7	adpbefx	6
1227.83	4	0.4	Z20170518-31a_filtered	41.723	1	1561.7009-GSMSSAAEPPPPPPPESAPSKPAASIASGGSNSSNK	1	snf2h	snf2h1	75.7	QDSINAYNE(3327.5677)PNSTK	549	snf2h	snf2h_reca2	35.5	unique	52.2	5.6	adpbefx	13
749.884	4	-0.4	Z20170518-33a_filtered	54.706	1	YK(1835.8730)APFHQLR+Incorrect Mono 1Da	931	snf2h	snf2h_slide	16.9	TPEEVIEYSAVFWE(1140.6192)R+Incorrect Mono 1Da	891	snf2h	snf2h_sant	13.4	unique	63.3	5.6	adpbefx	5.5
1021.48	3	1	Z20170518-33b_filtered	47.874	1	IDEAESLND(1298.6408)EELEEK+Incorrect Mono 1Da	830	snf2h	snf2h_hand	24.7	K(1743.7687)ANYAVDAYFR+Incorrect Mono 1Da	741	snf2h	snf2h_hand	23.1	positional variants	62	5.6	adpbefx	1.5
1047.51	4	-0.1	Z20170518-33b_filtered	60.928	1	GGPEGVAAQAVASAASAGPADAEME(912.5393)EIFDDASPGK+Incorrect Mono 1Da	61	snf2h	snf2h1	50.1	SK(3254.4674)LSEIVR+Incorrect Mono 1Da	321	snf2h	snf2h_reca1	0.8	positional variants	56.9	5.6	adpbefx	1.3
1252.64	5	1.3	Z20170518-31a_filtered	81.872	1	2896.5698-GSM(Oxidation)SSAAEPPPPPPPESAPSKPAASIASGGSNSSNK	1	snf2h	snf2h1	64.5	VGAGAPVYLAAVLEYLTAE(3343.5627)ILELAGNAAR	61	h2a	h2a_ap	47.8	unique	56.7	5.5	adpbefx	5.3
1047.02	4	0.3	Z20170518-31a_filtered	56.524	1	Q(Gln->pyro-Glu)TELFAHFIQPAAQK(1747.7636)TPTSPLK+Incorrect Mono 1Da	114	snf2h	snf2h_auton	36.1	TEQEED(2417.2743)EELLTESSK+Incorrect Mono 1Da	153	snf2h	snf2h_auton	22.9	unique	60.6	5.5	adpbefx	4.4
1033	4	-2.4	Z20170518-33b_filtered	59.499	1	GGPEGVAAQAVASAASAGPADAEMEE(854.4974)IFDDASPGK+Incorrect Mono 1Da	62	snf2h	snf2h1	51.5	ALDTK(3254.4674)IGR+Incorrect Mono 1Da	926	snf2h	snf2h_slide	0.8	unique	56.9	5.5	adpbefx	3.1
1103.68	6	-0.2	Z20170518-31a_filtered	52.998	1	3254.4674-GSM(Oxidation)SSAAEPPPPPPPESAPSKPAASIASGGSNSSNK	1	snf2h	snf2h1	57.5	GGPEGVAAQAVASAASAGPADAEME(3343.5627)EIFDDASPGK	61	snf2h	snf2h1	52.5	positional variants	57.5	5.5	adpbefx	4.6
974.796	3	0	Z20170518-33b_filtered	44.14	1	Q(Gln->pyro-Glu)K(1204.5724)EIQEPDPTYEEK+Incorrect Mono 1Da	73	snf2h	snf2h1	43.7	FITD(1697.7784)NTVEER+Incorrect Mono 1Da	612	snf2h	snf2h_reca2	14.5	unique	57.3	5.5	adpbefx	7
1103.68	6	-0.2	Z20170518-31a_filtered	52.998	1	3254.4674-GSM(Oxidation)SSAAEPPPPPPPESAPSKPAASIASGGSNSSNK	1	snf2h	snf2h1	57.5	GGPEGVAAQAVASAASAGPADAEMEE(3343.5627)IFDDASPGK	62	snf2h	snf2h1	52.5	positional variants	57.5	5.5	adpbefx	3.9
1124.76	4	-0.6	Z20170518-31a_filtered	56.11	1	GGPEGVAAQAVASAASAGPADAE(1221.5262)MEEIFDDASPGK+Incorrect Mono 1Da	59	snf2h	snf2h1	55.4	GK(3254.4674)NYTEEEDR+Incorrect Mono 1Da	947	snf2h	snf2h_slide	3.9	unique	55.1	5.4	adpbefx	2
1021.48	3	1	Z20170518-33b_filtered	47.874	1	K(1743.7687)ANYAVDAYFR+Incorrect Mono 1Da	741	snf2h	snf2h_hand	23.1	IDEAESLNDE(1298.6408)ELEEK+Incorrect Mono 1Da	831	snf2h	snf2h_hand	21.6	positional variants	60.5	5.4	adpbefx	4.5
1046.77	4	1.2	Z20170518-31a_filtered	56.854	1	Q(Gln->pyro-Glu)TELFAHFIQPAAQK(1747.7636)TPTSPLK	114	snf2h	snf2h_auton	79.8	TEQEEDE(2417.2743)ELLTESSK	154	snf2h	snf2h_auton	47.5	unique	46.6	5.4	adpbefx	7.8
1127.31	5	0	Z20170518-31a_filtered	49.58	1	2284.9219-GSMSSAAEPPPPPPPESAPSKPAASIASGGSNSSNK+Incorrect Mono 1Da	1	snf2h	snf2h1	76.7	NFTMD(3327.5677)TESSVYNFEGEDYR+Incorrect Mono 1Da	708	snf2h	snf2h4	46.2	unique	54.3	5.4	adpbefx	8.2
883.784	3	-1.1	Z20170518-33a_filtered	50.121	1	LLTQGFTNWNK(1170.5458)R+Incorrect Mono 1Da	849	snf2h	snf2h_sant	9.8	ANYAVD(1458.7732)AYFR+Incorrect Mono 1Da	747	snf2h	snf2h_hand	7.4	unique	61.5	5.4	adpbefx	4
1139.16	5	4.5	Z20170518-31a_filtered	66.444	1	GGPEGVAAQAVASAASAGPADAEME(2417.2743)EIFDDASPGK+Incorrect Mono 1Da	61	snf2h	snf2h1	51.5	Q(Gln->pyro-Glu)TELFAHFIQPAAQK(3254.4674)TPTSPLK+Incorrect Mono 1Da	114	snf2h	snf2h_auton	11.7	positional variants	50.9	5.3	adpbefx	2
1139.16	5	4.5	Z20170518-31a_filtered	66.444	1	GGPEGVAAQAVASAASAGPADAE(2417.2743)MEEIFDDASPGK+Incorrect Mono 1Da	59	snf2h	snf2h1	51.5	Q(Gln->pyro-Glu)TELFAHFIQPAAQK(3254.4674)TPTSPLK+Incorrect Mono 1Da	114	snf2h	snf2h_auton	11.7	positional variants	50.9	5.3	adpbefx	4.5
1139.16	5	4.5	Z20170518-31a_filtered	66.444	1	GGPEGVAAQAVASAASAGPADAEMEE(2417.2743)IFDDASPGK+Incorrect Mono 1Da	62	snf2h	snf2h1	50.9	Q(Gln->pyro-Glu)TELFAHFIQPAAQK(3254.4674)TPTSPLK+Incorrect Mono 1Da	114	snf2h	snf2h_auton	11.7	positional variants	50.9	5.3	adpbefx	1.7
984.871	5	-1	Z20170518-31a_filtered	60.658	1	GGPEGVAAQAVASAASAGPADAEMEEIFDD(1645.8424)ASPGK+Incorrect Mono 1Da	66	snf2h	snf2h1	36.2	KDEK(3254.4674)QNLLSVGDYR+Incorrect Mono 1Da	134	snf2h	snf2h_auton	3.7	positional variants	56.8	5.3	adpbefx	1.2
1103.56	4	3.9	Z20170518-31a_filtered	65.097	1	GGPEGVAAQAVASAASAGPADAE(1136.6991)MEEIFDDASPGK+Incorrect Mono 1Da	59	snf2h	snf2h1	65.5	MVVLDK(3254.4674)LLPK+Incorrect Mono 1Da	492	snf2h	snf2h_reca2	3	unique	48.9	5.2	adpbefx	2.6
1038.53	4	1.9	Z20170518-33b_filtered	61.876	1	Q(Gln->pyro-Glu)TELFAHFIQPAAQK(1714.7897)TPTSPLK	114	snf2h	snf2h_auton	67.8	ESEITD(2417.2743)EDIDGILER	673	snf2h	snf2h_negc	40.6	positional variants	48.5	5.2	adpbefx	2.8
1038.53	4	1.9	Z20170518-33b_filtered	61.876	1	Q(Gln->pyro-Glu)TELFAHFIQPAAQK(1714.7897)TPTSPLK	114	snf2h	snf2h_auton	67.8	ESEITDE(2417.2743)DIDGILER	674	snf2h	snf2h_negc	40.6	positional variants	48.5	5.2	adpbefx	1.8
1051.23	4	-0.1	Z20170518-31a_filtered	56.627	1	GGPEGVAAQAVASAASAGPADAE(927.4232)MEEIFDDASPGK+Incorrect Mono 1Da	59	snf2h	snf2h1	53.7	K(3254.4674)MDGAPDGR+Incorrect Mono 1Da	1038	snf2h	snf2h5	7	unique	52.1	5.2	adpbefx	3
1270.1	4	-0.2	Z20170518-31a_filtered	48.65	1	1714.7897-GSM(Oxidation)SSAAEPPPPPPPESAPSKPAASIASGGSNSSNK	1	snf2h	snf2h1	73.5	ESEITDE(3343.5627)DIDGILER	674	snf2h	snf2h_negc	29.1	positional variants	50	5.2	adpbefx	3.4
1022.81	3	0.1	Z20170518-33a_filtered	46.918	1	TEQEEDE(1298.6408)ELLTESSK+Incorrect Mono 1Da	154	snf2h	snf2h_auton	29.3	K(1747.7636)ANYAVDAYFR+Incorrect Mono 1Da	741	snf2h	snf2h_hand	19.1	unique	58.9	5.2	adpbefx	2.5
992.541	3	0.8	Z20170518-33b_filtered	60.473	1	NPE(1693.9443)LPNAAQAQK+Incorrect Mono 1Da	807	snf2h	snf2h_hand	22.2	LFELLEK(1261.6415)EILFYR+Incorrect Mono 1Da	789	snf2h	snf2h_hand	19.9	unique	60.2	5.2	adpbefx	6.6
1054.02	6	1.1	Z20170518-31a_filtered	77.799	1	VGAGAPVYLAAVLEYLTAE(3403.5060)ILELAGNAAR	61	h2a	h2a_ap	62.3	K(2896.5698)C(Carbamidomethyl)C(Carbamidomethyl)NHPYLFDGAEPGPPYTTDM(Oxidation)HLVTNSGK	457	snf2h	snf2h_reca2	48.5	unique	55	5.2	adpbefx	13
1273.34	4	0.1	Z20170518-31a_filtered	44.766	1	1743.7687-GSMSSAAEPPPPPPPESAPSKPAASIASGGSNSSNK	1	snf2h	snf2h1	71.3	IDEAE(3327.5677)SLNDEELEEK	826	snf2h	snf2h_hand	34.9	positional variants	50.1	5.2	adpbefx	12
1051.23	4	-0.3	Z20170518-33b_filtered	58.313	1	GGPEGVAAQAVASAASAGPADAEME(927.4232)EIFDDASPGK+Incorrect Mono 1Da	61	snf2h	snf2h1	51.6	K(3254.4674)MDGAPDGR+Incorrect Mono 1Da	1038	snf2h	snf2h5	4.9	positional variants	50.6	5.2	adpbefx	1.8
1051.23	4	-0.3	Z20170518-33b_filtered	58.313	1	GGPEGVAAQAVASAASAGPADAEMEE(927.4232)IFDDASPGK+Incorrect Mono 1Da	62	snf2h	snf2h1	51	K(3254.4674)MDGAPDGR+Incorrect Mono 1Da	1038	snf2h	snf2h5	4.9	positional variants	50.6	5.2	adpbefx	1.5
778.863	4	-0.1	Z20170518-33b_filtered	42.076	1	TEQEEDEELLTESSK(542.2700)ATNVC(Carbamidomethyl)TR+Incorrect Mono 1Da	162	snf2h	snf2h2	34.9	E(2550.1392)VEGK+Incorrect Mono 1Da	873	snf2h	snf2h_sant	3.4	unique	54	5.1	adpbefx	2
1005.69	4	0.7	Z20170518-33b_filtered	49.724	1	NFTMDTESSVYNFE(1714.8050)GEDYR+Incorrect Mono 1Da	717	snf2h	snf2h4	34.8	QK(2284.9219)EIQEPDPTYEEK+Incorrect Mono 1Da	73	snf2h	snf2h1	30.6	unique	55.2	5.1	adpbefx	3
1270.1	4	-0.2	Z20170518-31a_filtered	48.65	1	1714.7897-GSM(Oxidation)SSAAEPPPPPPPESAPSKPAASIASGGSNSSNK	1	snf2h	snf2h1	73.5	ESEITD(3343.5627)EDIDGILER	673	snf2h	snf2h_negc	28.6	positional variants	49.4	5.1	adpbefx	6.1
1181.14	4	-0.6	Z20170518-31a_filtered	82.959	1	VGAGAPVYLAAVLEYLTAE(1804.9658)ILELAGNAAR+Incorrect Mono 1Da	61	h2a	h2a_ap	36.5	TLQTISLLGYMK(2896.5698)HYR+Incorrect Mono 1Da	225	snf2h	snf2h_reca1	8.7	unique	57.5	5.1	adpbefx	6
1068.8	4	0	Z20170518-33b_filtered	65.216	1	TPEEVIE(2417.2743)YSAVFWER	884	snf2h	snf2h_sant	47.5	Q(Gln->pyro-Glu)TELFAHFIQPAAQK(1835.8730)TPTSPLK	114	snf2h	snf2h_auton	44.9	unique	51.1	5.1	adpbefx	9.5
772.412	4	-0.9	Z20170518-33b_filtered	49.481	1	NPE(1804.9658)LPNAAQAQK+Incorrect Mono 1Da	807	snf2h	snf2h_hand	19.1	TLQTISLLGYMK(1261.6415)HYR+Incorrect Mono 1Da	225	snf2h	snf2h_reca1	13.5	unique	57.9	5.1	adpbefx	6
1140.81	4	0.2	Z20170518-31a_filtered	49.188	1	1213.6489-GSMSSAAEPPPPPPPESAPSKPAASIASGGSNSSNK	1	snf2h	snf2h1	71	C(Carbamidomethyl)NTLITLIE(3327.5677)R	1011	snf2h	snf2h_slide	19.3	unique	44.8	5.1	adpbefx	14
816.743	3	-1.6	Z20170518-33a_filtered	36.542	1	Q(Gln->pyro-Glu)DSINAYNE(883.5240)PNSTK+Incorrect Mono 1Da	549	snf2h	snf2h_reca2	27.6	IGQTK(1544.6743)TVR+Incorrect Mono 1Da	602	snf2h	snf2h_reca2	11.7	unique	54.7	5	adpbefx	5.5
1127.11	5	0.1	Z20170518-31a_filtered	49.762	1	2284.9219-GSMSSAAEPPPPPPPESAPSKPAASIASGGSNSSNK	1	snf2h	snf2h1	67.2	NFTMDTE(3327.5677)SSVYNFEGEDYR	710	snf2h	snf2h4	38.7	unique	52.2	5	adpbefx	20.7
1169.55	4	1.2	Z20170518-31a_filtered	62.51	1	GGPEGVAAQAVASAASAGPAD(1400.6970)AEMEEIFDDASPGK+Incorrect Mono 1Da	57	snf2h	snf2h1	57.7	DIDILNSAGK(3254.4674)MDK+Incorrect Mono 1Da	442	snf2h	snf2h_reca2	5.3	unique	47.9	5	adpbefx	3.5
931.47	5	0	Z20170518-31a_filtered	42.106	1	1306.7357-GSMSSAAEPPPPPPPESAPSKPAASIASGGSNSSNK	1	snf2h	snf2h1	71.5	D(3327.5677)NIQGITKPAIR	24	h4	h4_tail	23.4	unique	47.7	5	adpbefx	8
1028.49	4	-2.3	Z20170518-33b_filtered	56.885	1	GGPEGVAAQAVASAASAGPADAEME(836.4756)EIFDDASPGK+Incorrect Mono 1Da	61	snf2h	snf2h1	44.1	VSEPK(3254.4674)APK+Incorrect Mono 1Da	760	snf2h	snf2h_hand	-1.7	positional variants	53.8	5	adpbefx	3
1028.49	4	-2.3	Z20170518-33b_filtered	56.885	1	GGPEGVAAQAVASAASAGPADAEMEE(836.4756)IFDDASPGK+Incorrect Mono 1Da	62	snf2h	snf2h1	43.5	VSEPK(3254.4674)APK+Incorrect Mono 1Da	760	snf2h	snf2h_hand	-1.7	positional variants	53.8	5	adpbefx	3
988.519	5	0.8	Z20170518-31a_filtered	72.254	1	GLNWLISLYENGINGILADE(2247.1701)MGLGK+Incorrect Mono 1Da	208	snf2h	snf2h_reca1	37.2	APRPPK(2671.3680)QPNVQDFQFFPPR+Incorrect Mono 1Da	769	snf2h	snf2h_hand	22.2	positional variants	53	5	adpbefx	2
988.519	5	0.8	Z20170518-31a_filtered	72.254	1	GLNWLISLYENGINGILAD(2247.1701)EMGLGK+Incorrect Mono 1Da	207	snf2h	snf2h_reca1	34.1	APRPPK(2671.3680)QPNVQDFQFFPPR+Incorrect Mono 1Da	769	snf2h	snf2h_hand	22.2	positional variants	53	5	adpbefx	2
1273.34	4	0.1	Z20170518-31a_filtered	44.766	1	1743.7687-GSMSSAAEPPPPPPPESAPSKPAASIASGGSNSSNK	1	snf2h	snf2h1	71.3	IDE(3327.5677)AESLNDEELEEK	824	snf2h	snf2h_hand	34.2	positional variants	49.4	5	adpbefx	3.5
1050.9	5	-0.3	Z20170518-31a_filtered	42.815	1	1903.8647-GSMSSAAEPPPPPPPESAPSKPAASIASGGSNSSNK	1	snf2h	snf2h1	68.5	RTEQEE(3327.5677)DEELLTESSK	152	snf2h	snf2h_auton	31.1	positional variants	46.5	5	adpbefx	8.4
803.566	5	-2.3	Z20170518-33b_filtered	43.709	1	EIQEPDPTYEEK(1903.8647)MQTDR+Incorrect Mono 1Da	85	snf2h	snf2h_auton	28.6	RTEQEE(2089.9262)DEELLTESSK+Incorrect Mono 1Da	152	snf2h	snf2h_auton	19.7	positional variants	55.6	5	adpbefx	1.3
855.069	3	-1.8	Z20170518-33a_filtered	38.19	1	IDEAESLNDEELEEK(542.2700)EK+Incorrect Mono 1Da	836	snf2h	snf2h_hand	14.1	E(2000.9062)VEGK+Incorrect Mono 1Da	873	snf2h	snf2h_sant	3	unique	55.9	5	adpbefx	2.5
1013.08	5	0.8	Z20170518-32b_filtered	50.152	1	1714.7897-GSMSSAAEPPPPPPPESAPSKPAASIASGGSNSSNK	1	snf2h	snf2h1	66.3	E(3327.5677)SEITDEDIDGILER	668	snf2h	snf2h_negc	38.7	unique	52.3	4.9	adpbefx	22.1
1091.52	4	-0.4	Z20170518-31a_filtered	57.764	1	GGPE(1088.5648)GVAAQAVASAASAGPADAEMEEIFDDASPGK+Incorrect Mono 1Da	40	snf2h	snf2h1	52.5	LSK(3254.4674)MGESSLR+Incorrect Mono 1Da	696	snf2h	snf2h_negc	10.1	unique	48.5	4.9	adpbefx	2
960.472	3	-0.8	Z20170518-33b_filtered	47.678	1	Q(Gln->pyro-Glu)K(1161.6030)EIQEPDPTYEEK+Incorrect Mono 1Da	73	snf2h	snf2h1	36.5	ISGLIYEE(1697.7784)TR+Incorrect Mono 1Da	53	h4	h4	5.6	unique	50.8	4.9	adpbefx	2.5
1074.52	3	-0.5	Z20170518-33b_filtered	48.627	1	IDEAESLND(1458.7732)EELEEK	830	snf2h	snf2h_hand	53.1	LLTQGFTNWNK(1743.7687)R	849	snf2h	snf2h_sant	47.8	positional variants	46.5	4.9	adpbefx	4
978.789	4	-0.6	Z20170518-31a_filtered	65.272	1	VTIAQGGVLPNIQSVLLPK(1835.8730)K+Incorrect Mono 1Da	118	h2a	h2a_ctail	37.5	TPEEVIE(2056.2408)YSAVFWER+Incorrect Mono 1Da	884	snf2h	snf2h_sant	13.4	unique	48.8	4.9	adpbefx	5
790.108	4	-0.7	Z20170518-33b_filtered	43.855	1	NFTM(Oxidation)DTESSVYNFE(836.4756)GEDYR+Incorrect Mono 1Da	717	snf2h	snf2h4	24.4	VSEPK(2300.9168)APK+Incorrect Mono 1Da	760	snf2h	snf2h_hand	3	unique	53.7	4.9	adpbefx	4
803.566	5	-2.3	Z20170518-33b_filtered	43.709	1	EIQEPDPTYEEK(1903.8647)MQTDR+Incorrect Mono 1Da	85	snf2h	snf2h_auton	28.6	RTEQEEDE(2089.9262)ELLTESSK+Incorrect Mono 1Da	154	snf2h	snf2h_auton	18.2	positional variants	54.2	4.8	adpbefx	1.3
945.157	6	0.2	Z20170518-31a_filtered	80.433	1	VGAGAPVYLAAVLEYLTAE(2750.3148)ILELAGNAAR	61	h2a	h2a_ap	62.5	HGATHVFASK(2896.5698)ESEITDEDIDGILER	667	snf2h	snf2h_negc	47.5	unique	51.5	4.8	adpbefx	3
842.039	5	0.4	Z20170518-31a_filtered	67.443	1	FQSSAVM(Oxidation)ALQEASEAYLVALFE(750.4388)DTNLAAIHAK+Incorrect Mono 1Da	105	h3	h3	46.5	AK(3435.7021)SAPAPK+Incorrect Mono 1Da	2	h2b	h2b_tail	0.8	positional variants	52	4.8	adpbefx	2
842.039	5	0.4	Z20170518-31a_filtered	67.443	1	FQSSAVM(Oxidation)ALQEASEAYLVALFE(750.4388)DTNLAAIHAK+Incorrect Mono 1Da	105	h3	h3	46.5	3435.7021-AKSAPAPK+Incorrect Mono 1Da	1	h2b	h2b_tail	0.8	positional variants	52	4.8	adpbefx	2
1077.58	3	0.9	Z20170518-33b_filtered	59.433	1	Q(Gln->pyro-Glu)TELFAHFIQPAAQK(793.4374)TPTSPLK+Incorrect Mono 1Da	114	snf2h	snf2h_auton	29.1	FE(2417.2743)YLLK+Incorrect Mono 1Da	95	snf2h	snf2h_auton	11.3	unique	53.9	4.8	adpbefx	13
1050.9	5	-0.3	Z20170518-31a_filtered	42.815	1	1903.8647-GSMSSAAEPPPPPPPESAPSKPAASIASGGSNSSNK	1	snf2h	snf2h1	68.5	RTEQE(3327.5677)EDEELLTESSK	151	snf2h	snf2h_auton	29.5	positional variants	45	4.8	adpbefx	6.6
753.468	4	1.2	Z20170518-33b_filtered	60.923	1	VTIAQGGVLPNIQSVLLPK(934.5852)K+Incorrect Mono 1Da	118	h2a	h2a_ctail	22	LLLPGE(2056.2408)LAK+Incorrect Mono 1Da	102	h2b	h2b_ap	0.6	unique	54	4.8	adpbefx	4
1048.01	4	-2	Z20170518-33b_filtered	58.307	1	GGPEGVAAQAVASAASAGPADAE(914.5338)MEEIFDDASPGK+Incorrect Mono 1Da	59	snf2h	snf2h1	61.3	TIGYK(3254.4674)VPR+Incorrect Mono 1Da	801	snf2h	snf2h_hand	-1.7	unique	51.1	4.8	adpbefx	4.9
732.61	4	1.7	Z20170518-33b_filtered	39.159	1	NPELPNAAQAQK(1018.4277)EEQLK+Incorrect Mono 1Da	816	snf2h	snf2h_hand	17.1	E(1888.9643)NM(Oxidation)ELEEK+Incorrect Mono 1Da	1013	snf2h	snf2h_slide	3.7	unique	56.2	4.8	adpbefx	2
1142.56	5	-1.4	Z20170518-31a_filtered	61.496	1	GGPEGVAAQAVASAASAGPAD(2434.3009)AEMEEIFDDASPGK+Incorrect Mono 1Da	57	snf2h	snf2h1	67.5	QTELFAHFIQPAAQK(3254.4674)TPTSPLK+Incorrect Mono 1Da	114	snf2h	snf2h_auton	18.4	positional variants	43.3	4.8	adpbefx	3.8
968.465	3	-2.1	Z20170518-33b_filtered	47.977	1	EIQEPDPTYEEK(793.4374)MQTDR+Incorrect Mono 1Da	85	snf2h	snf2h_auton	23.9	FE(2089.9262)YLLK+Incorrect Mono 1Da	95	snf2h	snf2h_auton	0.8	unique	57	4.7	adpbefx	7.3
808.716	3	-0.4	Z20170518-33a_filtered	34.406	1	IDEAESLNDEELE(660.3443)EK+Incorrect Mono 1Da	834	snf2h	snf2h_hand	17.2	K(1743.7687)TESSK+Incorrect Mono 1Da	119	h2a	h2a_ctail	3.9	unique	54.1	4.7	adpbefx	1.3
1153.25	3	1.8	Z20170518-33b_filtered	63.712	1	IDEAE(1693.9443)SLNDEELEEK+Incorrect Mono 1Da	826	snf2h	snf2h_hand	34.2	LFELLEK(1743.7687)EILFYR+Incorrect Mono 1Da	789	snf2h	snf2h_hand	18.9	unique	53.9	4.7	adpbefx	6.2
1038.53	4	0.9	Z20170518-31a_filtered	61.403	1	Q(Gln->pyro-Glu)TELFAHFIQPAAQK(1714.7897)TPTSPLK	114	snf2h	snf2h_auton	57.1	ESEITDED(2417.2743)IDGILER	675	snf2h	snf2h_negc	37.5	positional variants	45.4	4.7	adpbefx	1.3
1278.34	4	0.3	Z20170518-31a_filtered	42.719	1	1747.7636-GSM(Oxidation)SSAAEPPPPPPPESAPSKPAASIASGGSNSSNK	1	snf2h	snf2h1	73.8	TEQEEDE(3343.5627)ELLTESSK	154	snf2h	snf2h_auton	28.1	positional variants	45.9	4.7	adpbefx	7.6
1033.49	3	3.3	Z20170518-33b_filtered	48.668	1	IDEAESLNDE(1334.6619)ELEEK+Incorrect Mono 1Da	831	snf2h	snf2h_hand	21.4	DFNQFIK(1743.7687)ANEK+Incorrect Mono 1Da	857	snf2h	snf2h_sant	18.6	positional variants	50.3	4.7	adpbefx	2.7
1274.34	4	0.3	Z20170518-31a_filtered	43.778	1	1747.7636-GSMSSAAEPPPPPPPESAPSKPAASIASGGSNSSNK	1	snf2h	snf2h1	76.2	TEQEED(3327.5677)EELLTESSK	153	snf2h	snf2h_auton	30.2	positional variants	44.5	4.7	adpbefx	8.7
733.021	3	-0.1	Z20170518-33a_filtered	34.834	1	YK(1036.4098)APFHQLR+Incorrect Mono 1Da	931	snf2h	snf2h_slide	18.9	NYTEEE(1140.6192)DR+Incorrect Mono 1Da	953	snf2h	snf2h_slide	1.7	unique	54.9	4.7	adpbefx	4.5
1045.77	4	0.4	Z20170518-32b_filtered	57.297	1	Q(Gln->pyro-Glu)TELFAHFIQPAAQK(1743.7687)TPTSPLK	114	snf2h	snf2h_auton	50.1	IDEAESLNDE(2417.2743)ELEEK	831	snf2h	snf2h_hand	42.1	positional variants	44	4.7	adpbefx	1.6
1045.77	4	0.4	Z20170518-32b_filtered	57.297	1	Q(Gln->pyro-Glu)TELFAHFIQPAAQK(1743.7687)TPTSPLK	114	snf2h	snf2h_auton	50.1	IDEAESLNDEE(2417.2743)LEEK	832	snf2h	snf2h_hand	42.1	positional variants	44	4.7	adpbefx	1.3
741.121	4	-1	Z20170518-33a_filtered	41.377	1	NPELPNAAQAQK(1052.4815)EEQLK+Incorrect Mono 1Da	816	snf2h	snf2h_hand	19.6	FE(1888.9643)DSPSYVK+Incorrect Mono 1Da	171	snf2h	snf2h2	8.2	unique	55.5	4.7	adpbefx	2
1088.01	4	1.1	Z20170518-33b_filtered	41.917	1	1002.4328-GSMSSAAEPPPPPPPESAPSKPAASIASGGSNSSNK	1	snf2h	snf2h1	72.2	E(3327.5677)NMELEEK	1013	snf2h	snf2h_slide	16.4	unique	41.8	4.7	adpbefx	18
868.181	4	0.4	Z20170518-33b_filtered	55.514	1	IDEAE(1706.9144)SLNDEELEEK	826	snf2h	snf2h_hand	46.8	Q(Gln->pyro-Glu)K(1743.7687)IAFTEWIEPPKR	726	snf2h	snf2h4	45.2	positional variants	52.2	4.7	adpbefx	2.5
766.91	4	-0.6	Z20170518-33b_filtered	54.127	1	Q(Gln->pyro-Glu)TELFAHFIQPAAQK(627.3228)TPTSPLK+Incorrect Mono 1Da	114	snf2h	snf2h_auton	36.5	E(2417.2743)EQLK+Incorrect Mono 1Da	817	snf2h	snf2h_hand	0.8	positional variants	51.4	4.7	adpbefx	2.5
766.91	4	-0.6	Z20170518-33b_filtered	54.127	1	Q(Gln->pyro-Glu)TELFAHFIQPAAQK(627.3228)TPTSPLK+Incorrect Mono 1Da	114	snf2h	snf2h_auton	36.5	EE(2417.2743)QLK+Incorrect Mono 1Da	818	snf2h	snf2h_hand	0.8	positional variants	51.4	4.7	adpbefx	2.5
759.117	4	-1.5	Z20170518-33b_filtered	54.068	1	ESEITD(1298.6408)EDIDGILER+Incorrect Mono 1Da	673	snf2h	snf2h_negc	31.3	K(1714.7897)ANYAVDAYFR+Incorrect Mono 1Da	741	snf2h	snf2h_hand	30.2	unique	49.5	4.6	adpbefx	4.3
752.12	4	-1.4	Z20170518-33a_filtered	60.087	1	K(1740.7964)ESYAIYVYK+Incorrect Mono 1Da	31	h2b	h2b_tail	16.7	AMSIMNSFVNDVFE(1244.6441)R+Incorrect Mono 1Da	68	h2b	h2b	14.8	unique	53.9	4.6	adpbefx	9.5
902.717	4	1.3	Z20170518-31a_filtered	58.715	1	Q(Gln->pyro-Glu)TELFAHFIQPAAQK(1170.5458)TPTSPLK+Incorrect Mono 1Da	114	snf2h	snf2h_auton	34.2	ANYAVD(2417.2743)AYFR+Incorrect Mono 1Da	747	snf2h	snf2h_hand	12.1	unique	51	4.6	adpbefx	5
838.404	3	-0.5	Z20170518-33a_filtered	37.214	1	Q(Gln->pyro-Glu)DSINAYNE(948.5029)PNSTK+Incorrect Mono 1Da	549	snf2h	snf2h_reca2	19.6	ISYGTNK(1544.6743)GK+Incorrect Mono 1Da	945	snf2h	snf2h_slide	1.8	unique	53.1	4.6	adpbefx	5
1181.06	4	-0.6	Z20170518-31a_filtered	60.798	1	NFTMDTE(2417.2743)SSVYNFEGEDYR	710	snf2h	snf2h4	59.5	Q(Gln->pyro-Glu)TELFAHFIQPAAQK(2284.9219)TPTSPLK	114	snf2h	snf2h_auton	37.8	unique	45.3	4.6	adpbefx	4.5
1012.1	5	0.2	Z20170518-31a_filtered	46.916	1	1709.8889-GSMSSAAEPPPPPPPESAPSKPAASIASGGSNSSNK	1	snf2h	snf2h1	56	QTE(3327.5677)LFAHFIQPAAQK	102	snf2h	snf2h_auton	27.4	unique	46.7	4.6	adpbefx	7
1114.86	3	-0.9	Z20170518-33b_filtered	52.398	1	IDEAESLNDE(1578.7678)ELEEK+Incorrect Mono 1Da	831	snf2h	snf2h_hand	30.3	LGFDK(1743.7687)ENVYDELR+Incorrect Mono 1Da	968	snf2h	snf2h_slide	15.7	unique	51.4	4.6	adpbefx	1.5
1273.32	3	0.6	Z20170518-31a_filtered	62.245	1	EK(2348.1432)SVFKKFNWR+Incorrect Mono 1Da	296	snf2h	snf2h_reca1	13.8	DVLLPGEWDVC(Carbamidomethyl)VTSYE(1449.7881)MLIK+Incorrect Mono 1Da	290	snf2h	snf2h_reca1	6.2	unique	54.6	4.5	adpbefx	4.8
860.688	4	1.1	Z20170518-31a_filtered	55.218	1	Q(Gln->pyro-Glu)TELFAHFIQPAAQK(1002.4328)TPTSPLK+Incorrect Mono 1Da	114	snf2h	snf2h_auton	35.1	ENMELE(2417.2743)EK+Incorrect Mono 1Da	1018	snf2h	snf2h5	1.8	unique	50.5	4.5	adpbefx	1.5
1123.8	4	0	Z20170518-31a_filtered	45.907	1	1145.5829-GSMSSAAEPPPPPPPESAPSKPAASIASGGSNSSNK	1	snf2h	snf2h1	71	QNLLSVGD(3327.5677)YR	142	snf2h	snf2h_auton	13.4	unique	40.7	4.5	adpbefx	10
1096.02	4	-0.3	Z20170518-31a_filtered	42.775	1	1018.4720-GSM(Oxidation)SSAAEPPPPPPPESAPSKPAASIASGGSNSSNK	1	snf2h	snf2h1	53.4	E(3343.5627)NVYDELR	969	snf2h	snf2h_slide	13.2	unique	44.3	4.5	adpbefx	17.5
884.485	4	1.6	Z20170518-33b_filtered	56.044	1	E(2056.2408)IQEPDPTYEEK+Incorrect Mono 1Da	74	snf2h	snf2h1	17.9	VTIAQGGVLPNIQSVLLPK(1458.6515)K+Incorrect Mono 1Da	118	h2a	h2a_ctail	17.4	unique	51.2	4.5	adpbefx	1.7
746.834	4	1	Z20170518-33b_filtered	39.087	1	IDEAE(1221.5262)SLNDEELEEK	826	snf2h	snf2h_hand	59.4	GK(1743.7687)NYTEEEDR	947	snf2h	snf2h_slide	36.5	unique	43.9	4.5	adpbefx	2
1270.1	4	-0.4	Z20170518-31a_filtered	47.697	1	1714.7897-GSM(Oxidation)SSAAEPPPPPPPESAPSKPAASIASGGSNSSNK	1	snf2h	snf2h1	64.8	ESEITDEDID(3343.5627)GILER	677	snf2h	snf2h_negc	24.2	unique	42.9	4.5	adpbefx	4.7
1273.34	4	0.4	Z20170518-33b_filtered	44.768	1	1743.7687-GSMSSAAEPPPPPPPESAPSKPAASIASGGSNSSNK	1	snf2h	snf2h1	72.5	ID(3327.5677)EAESLNDEELEEK	823	snf2h	snf2h_hand	34.5	positional variants	45.5	4.5	adpbefx	3.6
773.706	3	-1	Z20170518-33a_filtered	33.363	1	Q(Gln->pyro-Glu)DSINAYNE(754.4086)PNSTK+Incorrect Mono 1Da	549	snf2h	snf2h_reca2	27	STGGK(1544.6743)APR+Incorrect Mono 1Da	14	h3	h3_tail	5.8	unique	46	4.4	adpbefx	2
1079.96	3	-1.5	Z20170518-33b_filtered	58.56	1	VTIAQGGVLPNIQSVLLPK(1161.6030)K+Incorrect Mono 1Da	118	h2a	h2a_ctail	26.9	ISGLIYE(2056.2408)ETR+Incorrect Mono 1Da	52	h4	h4	1.5	positional variants	46.6	4.4	adpbefx	3.5
1079.96	3	-1.5	Z20170518-33b_filtered	58.56	1	VTIAQGGVLPNIQSVLLPK(1161.6030)K+Incorrect Mono 1Da	118	h2a	h2a_ctail	26.9	ISGLIYEE(2056.2408)TR+Incorrect Mono 1Da	53	h4	h4	1.5	positional variants	46.6	4.4	adpbefx	3.5
860.771	3	-1.7	Z20170518-33a_filtered	42.439	1	K(1261.6415)ANYAVDAYFR+Incorrect Mono 1Da	741	snf2h	snf2h_hand	24.1	NPE(1298.6408)LPNAAQAQK+Incorrect Mono 1Da	807	snf2h	snf2h_hand	23.4	unique	51.6	4.4	adpbefx	5
954.949	4	-1.5	Z20170518-33b_filtered	58.195	1	NFTMDTESSVYNFE(1511.8381)GEDYR+Incorrect Mono 1Da	717	snf2h	snf2h4	20.4	ILMK(2284.9219)DIDILNSAGK+Incorrect Mono 1Da	432	snf2h	snf2h_reca2	18.5	unique	52.8	4.4	adpbefx	1.5
779.145	4	0.3	Z20170518-33b_filtered	42.318	1	NPELPNAAQAQK(1204.5724)EEQLK+Incorrect Mono 1Da	816	snf2h	snf2h_hand	22.5	FITD(1888.9643)NTVEER+Incorrect Mono 1Da	612	snf2h	snf2h_reca2	9.2	unique	52.7	4.4	adpbefx	2.5
1094.04	4	-0.4	Z20170518-31a_filtered	46.875	1	1026.5346-GSMSSAAEPPPPPPPESAPSKPAASIASGGSNSSNK	1	snf2h	snf2h1	68.5	D(3327.5677)IDILNSAGK	433	snf2h	snf2h_reca2	16.6	unique	42.2	4.4	adpbefx	13.5
1073.3	4	-0.6	Z20170518-31a_filtered	60.333	1	TPEE(2434.3009)VIEYSAVFWER+Incorrect Mono 1Da	881	snf2h	snf2h_sant	38.2	QTELFAHFIQPAAQK(1835.8730)TPTSPLK+Incorrect Mono 1Da	114	snf2h	snf2h_auton	30.2	positional variants	47.6	4.4	adpbefx	3.5
819.441	3	-0.3	Z20170518-33a_filtered	41.361	1	NPE(1175.6485)LPNAAQAQK	807	snf2h	snf2h_hand	44.4	IYVGLSK(1261.6415)MQR	420	snf2h	snf2h_reca2	39.1	unique	46.4	4.4	adpbefx	5
1300.37	4	0.5	Z20170518-31a_filtered	53.173	1	1835.8730-GSM(Oxidation)SSAAEPPPPPPPESAPSKPAASIASGGSNSSNK	1	snf2h	snf2h1	54.1	TPEEVIEYSAVFWE(3343.5627)R	891	snf2h	snf2h_sant	32.1	positional variants	44.7	4.3	adpbefx	1.5
1274.34	4	-0.3	Z20170518-31a_filtered	44.327	1	1747.7636-GSMSSAAEPPPPPPPESAPSKPAASIASGGSNSSNK	1	snf2h	snf2h1	72.2	TEQEEDEE(3327.5677)LLTESSK	155	snf2h	snf2h_auton	25	positional variants	42.1	4.3	adpbefx	2.6
1235.83	4	-0.7	Z20170518-31a_filtered	54.712	1	1593.7320-GSMSSAAEPPPPPPPESAPSKPAASIASGGSNSSNK	1	snf2h	snf2h1	82.3	VLDILE(3327.5677)DYC(Carbamidomethyl)MWR	518	snf2h	snf2h_reca2	21.4	unique	40.7	4.3	adpbefx	14.3
786.111	4	0.6	Z20170518-33b_filtered	46.512	1	NFTMDTESSVYNFEGE(836.4756)DYR+Incorrect Mono 1Da	719	snf2h	snf2h4	25.4	VSEPK(2284.9219)APK+Incorrect Mono 1Da	760	snf2h	snf2h_hand	2.8	positional variants	46.6	4.3	adpbefx	2
1148.04	4	-0.7	Z20170518-31a_filtered	56.317	1	GGPEGVAAQAVASAASAGPADAE(1298.6408)M(Oxidation)EEIFDDASPGK+Incorrect Mono 1Da	59	snf2h	snf2h1	62.4	K(3270.4623)ANYAVDAYFR+Incorrect Mono 1Da	741	snf2h	snf2h_hand	4.2	unique	42.3	4.3	adpbefx	3.3
1119.78	4	0.5	Z20170518-31a_filtered	42.918	1	1129.5074-GSMSSAAEPPPPPPPESAPSKPAASIASGGSNSSNK	1	snf2h	snf2h1	69.8	C(Carbamidomethyl)NE(3327.5677)LQDIEK	895	snf2h	snf2h_slide	11.7	unique	39.4	4.3	adpbefx	13.8
1153.05	4	2.1	Z20170518-31a_filtered	62.15	1	GGPEGVAAQAVASAASAGPADAEME(1334.6619)EIFDDASPGK+Incorrect Mono 1Da	61	snf2h	snf2h1	55	DFNQFIK(3254.4674)ANEK+Incorrect Mono 1Da	857	snf2h	snf2h_sant	-0.7	positional variants	50.5	4.3	adpbefx	1.5
1153.05	4	2.1	Z20170518-31a_filtered	62.15	1	GGPEGVAAQAVASAASAGPADAEMEE(1334.6619)IFDDASPGK+Incorrect Mono 1Da	62	snf2h	snf2h1	54.4	DFNQFIK(3254.4674)ANEK+Incorrect Mono 1Da	857	snf2h	snf2h_sant	-0.7	positional variants	50.5	4.3	adpbefx	1.5
1030.13	3	-1.5	Z20170518-33b_filtered	47.176	1	NFTMDTESSVYNFE(783.4491)GEDYR+Incorrect Mono 1Da	717	snf2h	snf2h4	16.1	IK(2284.9219)ADVEK+Incorrect Mono 1Da	399	snf2h	snf2h_reca1	7	unique	53.7	4.3	adpbefx	3
894.988	4	-1.7	Z20170518-33b_filtered	83.061	1	VGAGAPVYLAAVLEYLTAE(660.3443)ILELAGNAAR+Incorrect Mono 1Da	61	h2a	h2a_ap	55.8	K(2896.5698)TESSK+Incorrect Mono 1Da	119	h2a	h2a_ctail	0.8	unique	49	4.3	adpbefx	7.3
1100.5	4	-0.1	Z20170518-33b_filtered	38.172	1	1036.4098-GSM(Oxidation)SSAAEPPPPPPPESAPSKPAASIASGGSNSSNK	1	snf2h	snf2h1	67.8	NYTE(3343.5627)EEDR	951	snf2h	snf2h_slide	6.1	unique	37.8	4.3	adpbefx	16.2
673.866	4	0.2	Z20170518-33a_filtered	54.014	1	C(Carbamidomethyl)NTLITLIE(1458.7732)R+Incorrect Mono 1Da	1011	snf2h	snf2h_slide	8	LLTQGFTNWNK(1213.6489)R+Incorrect Mono 1Da	849	snf2h	snf2h_sant	7	unique	48.5	4.3	adpbefx	5
706.717	3	-0.7	Z20170518-33a_filtered	31.013	1	NPE(836.4756)LPNAAQAQK+Incorrect Mono 1Da	807	snf2h	snf2h_hand	26.9	VSEPK(1261.6415)APK+Incorrect Mono 1Da	760	snf2h	snf2h_hand	7.4	unique	46.9	4.2	adpbefx	19
1100.52	4	0.3	Z20170518-31a_filtered	42.198	1	1052.4815-GSMSSAAEPPPPPPPESAPSKPAASIASGGSNSSNK	1	snf2h	snf2h1	69.4	FED(3327.5677)SPSYVK	172	snf2h	snf2h2	12.9	positional variants	38.7	4.2	adpbefx	6.5
841.466	5	-3.2	Z20170518-31a_filtered	75.152	1	VGAGAPVYLAAVLEYLTAE(1286.7208)ILELAGNAAR+Incorrect Mono 1Da	61	h2a	h2a_ap	43.9	SAPATGGVK(2896.5698)KPHR+Incorrect Mono 1Da	36	h3	h3_tail	3	positional variants	50.3	4.2	adpbefx	3.8
841.466	5	-3.2	Z20170518-31a_filtered	75.152	1	VGAGAPVYLAAVLEYLTAE(1286.7208)ILELAGNAAR+Incorrect Mono 1Da	61	h2a	h2a_ap	43.9	SAPATGGVKK(2896.5698)PHR+Incorrect Mono 1Da	37	h3	h3_tail	3	positional variants	50.3	4.2	adpbefx	8.8
818.738	3	0.9	Z20170518-33b_filtered	40.385	1	IDE(690.4065)AESLNDEELEEK+Incorrect Mono 1Da	824	snf2h	snf2h_hand	41.2	K(1743.7687)TIGYK+Incorrect Mono 1Da	796	snf2h	snf2h_hand	4.5	unique	43.7	4.2	adpbefx	4.8
1131.8	4	0	Z20170518-31a_filtered	43.572	1	1161.6030-GSM(Oxidation)SSAAEPPPPPPPESAPSKPAASIASGGSNSSNK	1	snf2h	snf2h1	72.7	ISGLIYE(3343.5627)ETR	52	h4	h4	13.6	unique	36.8	4.2	adpbefx	13.5
868.954	4	-0.3	Z20170518-31a_filtered	52.002	1	QTELFAHFIQPAAQK(1018.4720)TPTSPLK+Incorrect Mono 1Da	114	snf2h	snf2h_auton	30.8	E(2434.3009)NVYDELR+Incorrect Mono 1Da	969	snf2h	snf2h_slide	10.1	unique	46.9	4.2	adpbefx	8.3
624.33	4	1	Z20170518-33b_filtered	41.595	1	LGFDKENVYDE(896.5080)LR	974	snf2h	snf2h_slide	42.5	K(1578.7678)SAPATGGVK	27	h3	h3_tail	34.2	unique	42.3	4.2	adpbefx	1.5
748.392	3	-1.6	Z20170518-33a_filtered	41.118	1	K(924.5029)ANYAVDAYFR+Incorrect Mono 1Da	741	snf2h	snf2h_hand	25	LVD(1298.6408)QNLNK+Incorrect Mono 1Da	641	snf2h	snf2h_reca2	12.4	unique	47.1	4.2	adpbefx	3
865.441	4	1.6	Z20170518-33b_filtered	66.901	1	FLIC(Carbamidomethyl)MLHK(1835.8730)LGFDK+Incorrect Mono 1Da	963	snf2h	snf2h_slide	13.1	TPEEVIEYSAVFWE(1602.8415)R+Incorrect Mono 1Da	891	snf2h	snf2h_sant	11.9	unique	50.4	4.2	adpbefx	3
885.092	3	0.3	Z20170518-33a_filtered	41.108	1	Q(Gln->pyro-Glu)DSINAYNE(1088.5648)PNSTK+Incorrect Mono 1Da	549	snf2h	snf2h_reca2	20.1	LSK(1544.6743)MGESSLR+Incorrect Mono 1Da	696	snf2h	snf2h_negc	12.7	unique	50.5	4.2	adpbefx	2
1186.32	4	0.3	Z20170518-33b_filtered	64.482	1	GGPEGVAAQAVASAASAGPADAE(1467.7874)MEEIFDDASPGK+Incorrect Mono 1Da	59	snf2h	snf2h1	51.2	IAFTEWIEPPK(3254.4674)R+Incorrect Mono 1Da	737	snf2h	snf2h_hand	9.9	unique	40.8	4.2	adpbefx	4.3
759.838	4	-0.2	Z20170518-33a_filtered	51.402	1	NFTMDTESSVYNFE(731.3867)GEDYR+Incorrect Mono 1Da	717	snf2h	snf2h4	33	K(2284.9219)FNWR+Incorrect Mono 1Da	301	snf2h	snf2h_reca1	-0.4	unique	46	4.2	adpbefx	2
1032.5	4	0.6	Z20170518-33b_filtered	51.413	1	GGPEGVAAQAVASAASAGPADAE(836.4756)M(Oxidation)EEIFDDASPGK+Incorrect Mono 1Da	59	snf2h	snf2h1	43.9	VSEPK(3270.4623)APK+Incorrect Mono 1Da	760	snf2h	snf2h_hand	-1.7	positional variants	45.4	4.1	adpbefx	5.5
760.376	4	-0.5	Z20170518-33b_filtered	48.015	1	EK(1458.6515)LLTQGFTNWNK+Incorrect Mono 1Da	838	snf2h	snf2h_hand	40.4	E(1559.8096)IQEPDPTYEEK+Incorrect Mono 1Da	74	snf2h	snf2h1	33.3	unique	45.3	4.1	adpbefx	2.5
904.769	3	-0.2	Z20170518-33a_filtered	38.875	1	IDEAE(948.5029)SLNDEELEEK+Incorrect Mono 1Da	826	snf2h	snf2h_hand	35.1	ISYGTNK(1743.7687)GK+Incorrect Mono 1Da	945	snf2h	snf2h_slide	1.4	positional variants	47.1	4.1	adpbefx	2.3
724.112	4	-1.1	Z20170518-33a_filtered	50.663	1	IDEAESLNDEELEEK(872.5008)EK+Incorrect Mono 1Da	836	snf2h	snf2h_hand	17.9	LFELLE(2000.9062)K+Incorrect Mono 1Da	788	snf2h	snf2h_hand	2.5	unique	49	4.1	adpbefx	2
956.689	4	0.6	Z20170518-33b_filtered	51.706	1	EIQEPDPTYEEK(1714.7897)MQTDR	85	snf2h	snf2h_auton	51	E(2089.9262)SEITDEDIDGILER	668	snf2h	snf2h_negc	39.8	unique	43.2	4.1	adpbefx	2
842.69	4	1.5	Z20170518-33b_filtered	62.086	1	TPEEVIE(1511.8381)YSAVFWER+Incorrect Mono 1Da	884	snf2h	snf2h_sant	27.9	ILMK(1835.8730)DIDILNSAGK+Incorrect Mono 1Da	432	snf2h	snf2h_reca2	26.8	unique	48.1	4.1	adpbefx	1.2
1036.24	4	-1.5	Z20170518-31a_filtered	61.065	1	EVEGK(1743.7687)TPEEVIEYSAVFWER+Incorrect Mono 1Da	877	snf2h	snf2h_sant	42.4	IDEAE(2378.1430)SLNDEELEEK+Incorrect Mono 1Da	826	snf2h	snf2h_hand	31.6	unique	44.4	4.1	adpbefx	2.7
721.777	7	3.3	Z20170518-31a_filtered	55.31	1	QK(3302.4132)IAFTEWIEPPKR+Incorrect Mono 1Da	726	snf2h	snf2h4	26.9	MGESSLRNFTMDTESSVYNFEGEDYRE(1723.9410)K+Incorrect Mono 1Da	723	snf2h	snf2h4	17.9	positional variants	48.9	4.1	adpbefx	8.2
721.777	7	3.3	Z20170518-31a_filtered	55.31	1	QK(3302.4132)IAFTEWIEPPKR+Incorrect Mono 1Da	726	snf2h	snf2h4	26.9	MGESSLRNFTMDTESSVYNFEGED(1723.9410)YREK+Incorrect Mono 1Da	720	snf2h	snf2h4	17.9	positional variants	48.9	4.1	adpbefx	2.1
721.777	7	3.3	Z20170518-31a_filtered	55.31	1	EK(3045.2757)QKIAFTEWIEPPKR+Incorrect Mono 1Da	724	snf2h	snf2h4	26.9	MGESSLRNFTMDTESSVYNFEGE(1981.0785)DYR+Incorrect Mono 1Da	719	snf2h	snf2h4	20.9	positional variants	48.9	4.1	adpbefx	1.5
721.777	7	3.3	Z20170518-31a_filtered	55.31	1	EK(3045.2757)QKIAFTEWIEPPKR+Incorrect Mono 1Da	724	snf2h	snf2h4	26.9	MGESSLRNFTMDTESSVYNFEGED(1981.0785)YR+Incorrect Mono 1Da	720	snf2h	snf2h4	20.9	positional variants	48.9	4.1	adpbefx	1.2
743.812	5	0.8	Z20170518-33b_filtered	83.305	1	VGAGAPVYLAAVLEYLTAE(798.4348)ILELAGNAAR+Incorrect Mono 1Da	61	h2a	h2a_ap	38.4	LK(2896.5698)EQGSR+Incorrect Mono 1Da	498	snf2h	snf2h_reca2	3.9	unique	45.8	4.1	adpbefx	6
806.383	5	1.4	Z20170518-33b_filtered	55.121	1	NFTMD(1723.9410)TESSVYNFEGEDYR	708	snf2h	snf2h4	46.1	QK(2284.9219)IAFTEWIEPPKR	726	snf2h	snf2h4	40.2	positional variants	43.9	4.1	adpbefx	6.5
1124.84	4	-0.7	Z20170518-31a_filtered	72.922	1	GLNWLISLYE(1804.9658)NGINGILADEMGLGK+Incorrect Mono 1Da	198	snf2h	snf2h_reca1	32	TLQTISLLGYMK(2671.3680)HYR+Incorrect Mono 1Da	225	snf2h	snf2h_reca1	15.8	unique	44.7	4.1	adpbefx	19
806.383	5	1.4	Z20170518-33b_filtered	55.121	1	NFTMDTE(1723.9410)SSVYNFEGEDYR	710	snf2h	snf2h4	45.5	QK(2284.9219)IAFTEWIEPPKR	726	snf2h	snf2h4	40.2	positional variants	43.9	4.1	adpbefx	6
894.777	3	-0.9	Z20170518-33b_filtered	41.982	1	TEQEEDE(914.5338)ELLTESSK+Incorrect Mono 1Da	154	snf2h	snf2h_auton	31.8	TIGYK(1747.7636)VPR+Incorrect Mono 1Da	801	snf2h	snf2h_hand	6.8	positional variants	45.4	4.1	adpbefx	3
681.361	5	0.8	Z20170518-33b_filtered	49.602	1	TPEEVIE(1546.8766)YSAVFWER+Incorrect Mono 1Da	884	snf2h	snf2h_sant	33.5	TPTSPLKMK(1835.8730)PGRPR+Incorrect Mono 1Da	123	snf2h	snf2h_auton	11.2	positional variants	46	4.1	adpbefx	4.5
829.17	4	-1.2	Z20170518-33b_filtered	59.417	1	LLTQGFTNWNK(1835.8730)R	849	snf2h	snf2h_sant	47.3	TPEEVIE(1458.7732)YSAVFWER	884	snf2h	snf2h_sant	44.8	unique	39.5	4.1	adpbefx	4
689.919	5	0.5	Z20170518-31a_filtered	49.008	1	NFTMDTESSVYNFE(1140.6192)GEDYR+Incorrect Mono 1Da	717	snf2h	snf2h4	14.4	YK(2284.9219)APFHQLR+Incorrect Mono 1Da	931	snf2h	snf2h_slide	11.3	unique	53.4	4.1	adpbefx	6
1069.01	4	0.1	Z20170518-31a_filtered	43.372	1	926.4458-GSMSSAAEPPPPPPPESAPSKPAASIASGGSNSSNK	1	snf2h	snf2h1	72.8	D(3327.5677)DIENIAR	865	snf2h	snf2h_sant	8.6	positional variants	36.5	4.1	adpbefx	13.2
1069.01	4	0.1	Z20170518-31a_filtered	43.372	1	926.4458-GSMSSAAEPPPPPPPESAPSKPAASIASGGSNSSNK	1	snf2h	snf2h1	72.8	DD(3327.5677)IENIAR	866	snf2h	snf2h_sant	8.6	positional variants	36.5	4	adpbefx	7.2
994.233	4	0.5	Z20170518-33b_filtered	39.677	1	627.3228-GSMSSAAEPPPPPPPESAPSKPAASIASGGSNSSNK	1	snf2h	snf2h1	75.8	E(3327.5677)EQLK	817	snf2h	snf2h_hand	7.1	unique	35.3	4	adpbefx	12.5
1100.52	4	0.3	Z20170518-31a_filtered	42.198	1	1052.4815-GSMSSAAEPPPPPPPESAPSKPAASIASGGSNSSNK	1	snf2h	snf2h1	69.4	FE(3327.5677)DSPSYVK	171	snf2h	snf2h2	11.3	positional variants	37.1	4	adpbefx	17.5
960.856	6	0.5	Z20170518-31a_filtered	81.463	1	VGAGAPVYLAAVLEYLTAE(2844.5075)ILELAGNAAR	61	h2a	h2a_ap	67.2	ANRFEYLLK(2896.5698)QTELFAHFIQPAAQK	99	snf2h	snf2h_auton	36.3	unique	43.6	4	adpbefx	3
1032.5	4	0.6	Z20170518-33b_filtered	51.413	1	GGPEGVAAQAVASAASAGPAD(836.4756)AEM(Oxidation)EEIFDDASPGK+Incorrect Mono 1Da	57	snf2h	snf2h1	46.1	VSEPK(3270.4623)APK+Incorrect Mono 1Da	760	snf2h	snf2h_hand	-1.7	positional variants	43.9	4	adpbefx	3.2
765.913	4	0.2	Z20170518-33b_filtered	52.56	1	APRPPK(793.4374)QPNVQDFQFFPPR+Incorrect Mono 1Da	769	snf2h	snf2h_hand	39.9	FE(2247.1701)YLLK+Incorrect Mono 1Da	95	snf2h	snf2h_auton	5.2	unique	39.9	4	adpbefx	7
767.361	4	-1	Z20170518-33b_filtered	46.377	1	TEQEED(1298.6408)EELLTESSK+Incorrect Mono 1Da	153	snf2h	snf2h_auton	32.4	K(1747.7636)ANYAVDAYFR+Incorrect Mono 1Da	741	snf2h	snf2h_hand	30	positional variants	45.5	4	adpbefx	1.9
1114.81	4	0.4	Z20170518-31a_filtered	44.217	1	1109.6193-GSMSSAAEPPPPPPPESAPSKPAASIASGGSNSSNK	1	snf2h	snf2h1	67.8	LD(3327.5677)SIVIQQGR	630	snf2h	snf2h_reca2	11.7	unique	40.7	4	adpbefx	11
1130.04	4	-0.6	Z20170518-31a_filtered	45.955	1	1170.5458-GSMSSAAEPPPPPPPESAPSKPAASIASGGSNSSNK	1	snf2h	snf2h1	71.4	ANYAVD(3327.5677)AYFR	747	snf2h	snf2h_hand	12.4	unique	38.1	4	adpbefx	13
792.65	5	0.5	Z20170518-31a_filtered	79.931	1	VGAGAPVYLAAVLEYLTAE(1042.6287)ILELAGNAAR+Incorrect Mono 1Da	61	h2a	h2a_ap	49.9	K(2896.5698)TIGYKVPR+Incorrect Mono 1Da	796	snf2h	snf2h_hand	-0.4	positional variants	48.9	4	adpbefx	10.5
680.716	6	1.2	Z20170518-31a_filtered	65.657	1	RK(2483.3536)TVTAMDVVYALK+Incorrect Mono 1Da	79	h4	h4	28.1	GVLKVFLENVIRDAVTYTE(1575.8807)HAK+Incorrect Mono 1Da	74	h4	h4	17.8	unique	43.7	4	adpbefx	40.3
677.091	4	1.1	Z20170518-33a_filtered	42.165	1	NPE(1423.6772)LPNAAQAQK+Incorrect Mono 1Da	807	snf2h	snf2h_hand	22.8	FEDSPSYVK(1261.6415)WGK+Incorrect Mono 1Da	178	snf2h	snf2h2	13.5	unique	48.5	4	adpbefx	4
1027.52	4	-5.7	Z20170518-31a_filtered	66.731	1	FEYLLK(1583.7521)QTELFAHFIQPAAQK+Incorrect Mono 1Da	99	snf2h	snf2h_auton	42.1	Q(Gln->pyro-Glu)PNVQD(2503.3264)FQFFPPR+Incorrect Mono 1Da	775	snf2h	snf2h_hand	25.9	unique	44.7	4	adpbefx	6
681.361	5	0.8	Z20170518-33b_filtered	49.602	1	TPEEVIE(1546.8766)YSAVFWER+Incorrect Mono 1Da	884	snf2h	snf2h_sant	33.5	TPTSPLK(1835.8730)MKPGRPR+Incorrect Mono 1Da	121	snf2h	snf2h_auton	10.6	positional variants	45.5	4	adpbefx	5.5
841.654	4	-0.5	Z20170518-33b_filtered	50.291	1	TEQEEDEELLTESSK(793.4374)ATNVC(Carbamidomethyl)TR+Incorrect Mono 1Da	162	snf2h	snf2h2	29.8	FE(2550.1392)YLLK+Incorrect Mono 1Da	95	snf2h	snf2h_auton	0.8	unique	48.2	4	adpbefx	2
1029.73	4	1.1	Z20170518-33b_filtered	58.169	1	GGPEGVAAQAVASAASAGPAD(841.4195)AEMEEIFDDASPGK+Incorrect Mono 1Da	57	snf2h	snf2h1	48.8	ANEK(3254.4674)WGR+Incorrect Mono 1Da	861	snf2h	snf2h_sant	0.8	unique	45.4	4	adpbefx	3
904.133	3	-2.2	Z20170518-33b_filtered	55.43	1	TPEEVIE(854.4974)YSAVFWER+Incorrect Mono 1Da	884	snf2h	snf2h_sant	34.7	ALDTK(1835.8730)IGR+Incorrect Mono 1Da	926	snf2h	snf2h_slide	5.2	unique	43.2	4	adpbefx	6
913.814	3	-1.4	Z20170518-33a_filtered	43.907	1	LLTQGFTNWNK(1261.6415)R	849	snf2h	snf2h_sant	40.9	NPE(1458.7732)LPNAAQAQK	807	snf2h	snf2h_hand	39.6	unique	43.4	4	adpbefx	3.5
1206.06	4	0.6	Z20170518-31a_filtered	41.237	1	1458.6515-GSM(Oxidation)SSAAEPPPPPPPESAPSKPAASIASGGSNSSNK	1	snf2h	snf2h1	64.7	E(3343.5627)IQEPDPTYEEK	74	snf2h	snf2h1	24.2	unique	39.3	4	adpbefx	30
796.194	4	0	Z20170518-33b_filtered	63.847	1	LFELLEK(1467.7874)EILFYR+Incorrect Mono 1Da	789	snf2h	snf2h_hand	23.6	IAFTE(1693.9443)WIEPPKR+Incorrect Mono 1Da	731	snf2h	snf2h4	17.3	unique	46.7	3.9	adpbefx	6
758.867	4	-0.3	Z20170518-33a_filtered	54.948	1	ESEITDEDIDGILE(1298.6408)R	681	snf2h	snf2h_negc	43.8	K(1714.7897)ANYAVDAYFR	741	snf2h	snf2h_hand	34.1	unique	38.6	3.9	adpbefx	2
747.083	4	-1.5	Z20170518-33a_filtered	38.599	1	IDE(1221.5262)AESLNDEELEEK+Incorrect Mono 1Da	824	snf2h	snf2h_hand	49	GK(1743.7687)NYTEEEDR+Incorrect Mono 1Da	947	snf2h	snf2h_slide	31.9	positional variants	43.6	3.9	adpbefx	2
1055.76	4	0.8	Z20170518-31a_filtered	39.443	1	857.4429-GSM(Oxidation)SSAAEPPPPPPPESAPSKPAASIASGGSNSSNK	1	snf2h	snf2h1	61.7	IM(Oxidation)AQIE(3343.5627)R	907	snf2h	snf2h_slide	1.6	unique	34.8	3.9	adpbefx	26.5
995.059	5	0.6	Z20170518-31a_filtered	61.441	1	GGPEGVAAQAVASAASAGPADAEMEEIFDD(1697.7784)ASPGK	66	snf2h	snf2h1	85.3	Q(Gln->pyro-Glu)K(3254.4674)EIQEPDPTYEEK	73	snf2h	snf2h1	31.2	positional variants	34.1	3.9	adpbefx	12.6
995.059	5	0.6	Z20170518-31a_filtered	61.441	1	GGPEGVAAQAVASAASAGPADAEMEE(1697.7784)IFDDASPGK	62	snf2h	snf2h1	85.3	Q(Gln->pyro-Glu)K(3254.4674)EIQEPDPTYEEK	73	snf2h	snf2h1	31.2	positional variants	34.1	3.9	adpbefx	11.2
676.361	4	-0.9	Z20170518-33b_filtered	45.783	1	NPELPNAAQAQK(793.4374)EEQLK+Incorrect Mono 1Da	816	snf2h	snf2h_hand	35.8	FE(1888.9643)YLLK+Incorrect Mono 1Da	95	snf2h	snf2h_auton	4.5	unique	44	3.9	adpbefx	2
829.029	5	0.9	Z20170518-31a_filtered	67.811	1	FQSSAVM(Oxidation)ALQEASEAYLVALFE(685.3871)DTNLAAIHAK+Incorrect Mono 1Da	105	h3	h3	32	TK(3435.7021)QTAR+Incorrect Mono 1Da	4	h3	h3_tail	1.8	positional variants	46.4	3.9	adpbefx	1.5
915.478	4	-1.2	Z20170518-33b_filtered	51.073	1	QTELFAHFIQPAAQK(1204.5724)TPTSPLK+Incorrect Mono 1Da	114	snf2h	snf2h_auton	22.9	FITDNTVE(2434.3009)ER+Incorrect Mono 1Da	616	snf2h	snf2h_reca2	6.5	positional variants	44	3.9	adpbefx	6
915.478	4	-1.2	Z20170518-33b_filtered	51.073	1	QTELFAHFIQPAAQK(1204.5724)TPTSPLK+Incorrect Mono 1Da	114	snf2h	snf2h_auton	22.9	FITDNTVEE(2434.3009)R+Incorrect Mono 1Da	617	snf2h	snf2h_reca2	6.5	positional variants	44	3.9	adpbefx	3
829.029	5	0.9	Z20170518-31a_filtered	67.811	1	FQSSAVM(Oxidation)ALQEASEAYLVALFED(685.3871)TNLAAIHAK+Incorrect Mono 1Da	106	h3	h3	32	TK(3435.7021)QTAR+Incorrect Mono 1Da	4	h3	h3_tail	1.8	positional variants	46.4	3.9	adpbefx	1.5
1202.81	4	0.5	Z20170518-31a_filtered	58.372	1	GGPEGVAAQAVASAASAGPADAE(1517.7474)M(Oxidation)EEIFDDASPGK+Incorrect Mono 1Da	59	snf2h	snf2h1	63.1	DEK(3270.4623)QNLLSVGDYR+Incorrect Mono 1Da	134	snf2h	snf2h_auton	18.9	unique	37.4	3.9	adpbefx	4
980.149	3	-0.4	Z20170518-33b_filtered	46.955	1	IDEAESLNDE(1175.6485)ELEEK	831	snf2h	snf2h_hand	60.6	IYVGLSK(1743.7687)MQR	420	snf2h	snf2h_reca2	32.9	positional variants	34.5	3.9	adpbefx	1.1
980.149	3	-0.4	Z20170518-33b_filtered	46.955	1	IDEAESLNDEE(1175.6485)LEEK	832	snf2h	snf2h_hand	60.6	IYVGLSK(1743.7687)MQR	420	snf2h	snf2h_reca2	32.9	positional variants	34.5	3.9	adpbefx	1.1
980.715	4	0.4	Z20170518-31a_filtered	36.285	1	557.2558-GSM(Oxidation)SSAAEPPPPPPPESAPSKPAASIASGGSNSSNK	1	snf2h	snf2h1	72.2	E(3343.5627)QGSR	499	snf2h	snf2h_reca2	0.8	unique	34.6	3.9	adpbefx	18.5
578.069	4	0.9	Z20170518-33b_filtered	56.581	1	IAFTEWIEPPK(821.4436)R+Incorrect Mono 1Da	737	snf2h	snf2h_hand	12.1	E(1467.7874)ILFYR+Incorrect Mono 1Da	790	snf2h	snf2h_hand	6.4	unique	39.8	3.9	adpbefx	2
660.513	6	0.8	Z20170518-31a_filtered	66.234	1	FQSSAVMALQEASEAYLVALFE(518.3077)DTNLAAIHAK+Incorrect Mono 1Da	105	h3	h3	41	K(3419.7071)PHR+Incorrect Mono 1Da	37	h3	h3_tail	1.4	unique	49.5	3.9	adpbefx	11.7
1040.5	5	0.9	Z20170518-32b_filtered	53.069	1	1835.8730-GSM(Oxidation)SSAAEPPPPPPPESAPSKPAASIASGGSNSSNK	1	snf2h	snf2h1	66.2	TPEE(3343.5627)VIEYSAVFWER	881	snf2h	snf2h_sant	30.6	positional variants	40.1	3.9	adpbefx	8.3
1040.5	5	0.9	Z20170518-32b_filtered	53.069	1	1835.8730-GSM(Oxidation)SSAAEPPPPPPPESAPSKPAASIASGGSNSSNK	1	snf2h	snf2h1	66.2	TPE(3343.5627)EVIEYSAVFWER	880	snf2h	snf2h_sant	30	positional variants	40.1	3.9	adpbefx	8.8
1148.05	4	0.7	Z20170518-31a_filtered	64.206	1	GGPEGVAAQAVASAASAGPAD(1314.6788)AEMEEIFDDASPGK+Incorrect Mono 1Da	57	snf2h	snf2h1	68.8	IGK(3254.4674)DEMLQMIR+Incorrect Mono 1Da	649	snf2h	snf2h_negc	1.4	positional variants	39.7	3.9	adpbefx	2.5
1148.05	4	0.7	Z20170518-31a_filtered	64.206	1	GGPEGVAAQAVASAASAGPADAE(1314.6788)MEEIFDDASPGK+Incorrect Mono 1Da	59	snf2h	snf2h1	65.8	IGK(3254.4674)DEMLQMIR+Incorrect Mono 1Da	649	snf2h	snf2h_negc	1.4	positional variants	39.7	3.9	adpbefx	1.5
792.65	5	0.5	Z20170518-31a_filtered	79.931	1	VGAGAPVYLAAVLEYLTAE(1042.6287)ILELAGNAAR+Incorrect Mono 1Da	61	h2a	h2a_ap	49.9	KTIGYK(2896.5698)VPR+Incorrect Mono 1Da	801	snf2h	snf2h_hand	-0.8	positional variants	48.9	3.9	adpbefx	4
1142.54	4	-0.7	Z20170518-31a_filtered	41.2	1	1204.5724-GSM(Oxidation)SSAAEPPPPPPPESAPSKPAASIASGGSNSSNK	1	snf2h	snf2h1	64.8	FITD(3343.5627)NTVEER	612	snf2h	snf2h_reca2	12.8	unique	36.9	3.8	adpbefx	27.5
1003.49	4	-0.9	Z20170518-33b_filtered	51.075	1	APRPPK(1743.7687)QPNVQDFQFFPPR+Incorrect Mono 1Da	769	snf2h	snf2h_hand	37.9	IDEAESLNDE(2247.1701)ELEEK+Incorrect Mono 1Da	831	snf2h	snf2h_hand	17.6	positional variants	43.1	3.8	adpbefx	4.5
1003.49	4	-0.9	Z20170518-33b_filtered	51.075	1	APRPPK(1743.7687)QPNVQDFQFFPPR+Incorrect Mono 1Da	769	snf2h	snf2h_hand	37.9	IDEAESLND(2247.1701)EELEEK+Incorrect Mono 1Da	830	snf2h	snf2h_hand	17.6	positional variants	43.1	3.8	adpbefx	4.2
1003.49	4	-0.9	Z20170518-33b_filtered	51.075	1	APRPPK(1743.7687)QPNVQDFQFFPPR+Incorrect Mono 1Da	769	snf2h	snf2h_hand	37.9	IDEAESLNDEE(2247.1701)LEEK+Incorrect Mono 1Da	832	snf2h	snf2h_hand	17.1	positional variants	43.1	3.8	adpbefx	1.7
1012.79	4	0.7	Z20170518-31a_filtered	83.292	1	VGAGAPVYLAAVLEYLTAE(1131.5594)ILELAGNAAR+Incorrect Mono 1Da	61	h2a	h2a_ap	66	TAEMNEK(2896.5698)LSK+Incorrect Mono 1Da	693	snf2h	snf2h_negc	4.3	unique	38.1	3.8	adpbefx	5
1243.57	4	0.9	Z20170518-31a_filtered	60.597	1	GGPEGVAAQAVASAASAGPAD(1697.7784)AEMEEIFDDASPGK	57	snf2h	snf2h1	74.2	Q(Gln->pyro-Glu)K(3254.4674)EIQEPDPTYEEK	73	snf2h	snf2h1	28.1	positional variants	31	3.8	adpbefx	6.9
808.728	3	-0.2	Z20170518-33a_filtered	37.017	1	TEQEEDE(656.3857)ELLTESSK+Incorrect Mono 1Da	154	snf2h	snf2h_auton	26.8	K(1747.7636)ALDTK+Incorrect Mono 1Da	921	snf2h	snf2h_slide	7.8	positional variants	42.8	3.8	adpbefx	1.1
1186.32	4	-1.7	Z20170518-31a_filtered	64.239	1	GGPEGVAAQAVASAASAGPAD(1467.7874)AEMEEIFDDASPGK+Incorrect Mono 1Da	57	snf2h	snf2h1	47.5	IAFTEWIEPPK(3254.4674)R+Incorrect Mono 1Da	737	snf2h	snf2h_hand	10	unique	38.5	3.8	adpbefx	5
1243.57	4	0.9	Z20170518-31a_filtered	60.597	1	GGPEGVAAQAVASAASAGPADAE(1697.7784)MEEIFDDASPGK	59	snf2h	snf2h1	74.2	Q(Gln->pyro-Glu)K(3254.4674)EIQEPDPTYEEK	73	snf2h	snf2h1	28.1	positional variants	31	3.8	adpbefx	8.1
1128.56	6	2.1	Z20170518-31a_filtered	68.305	1	3419.7071-GSMSSAAEPPPPPPPESAPSKPAASIASGGSNSSNK	1	snf2h	snf2h1	62	FQSSAVMALQEASEAYLVALFE(3327.5677)DTNLAAIHAK	105	h3	h3	34.2	positional variants	42	3.8	adpbefx	1.5
1033	4	1.4	Z20170518-31a_filtered	58.763	1	GGPEGVAAQAVASAASAGPADAEME(854.4974)EIFDDASPGK+Incorrect Mono 1Da	61	snf2h	snf2h1	44.5	ALDTK(3254.4674)IGR+Incorrect Mono 1Da	926	snf2h	snf2h_slide	0.8	positional variants	46	3.8	adpbefx	2.1
1068.53	4	-0.3	Z20170518-31a_filtered	40.67	1	924.5029-GSMSSAAEPPPPPPPESAPSKPAASIASGGSNSSNK	1	snf2h	snf2h1	84.3	LVD(3327.5677)QNLNK	641	snf2h	snf2h_reca2	10.8	unique	32.2	3.8	adpbefx	11
767.361	4	-1	Z20170518-33b_filtered	46.377	1	TEQEE(1298.6408)DEELLTESSK+Incorrect Mono 1Da	152	snf2h	snf2h_auton	30.8	K(1747.7636)ANYAVDAYFR+Incorrect Mono 1Da	741	snf2h	snf2h_hand	30	positional variants	43.9	3.8	adpbefx	1.7
721.716	3	-0.7	Z20170518-33a_filtered	60.464	1	TVTAMDVVYALK(695.3279)R+Incorrect Mono 1Da	91	h4	h4	8.3	TLYGFGG-1447.7857+Incorrect Mono 1Da	102	h4	h4	1.5	unique	42.5	3.8	adpbefx	7
948.453	3	-0.6	Z20170518-33b_filtered	52.495	1	IDEAESLND(1079.5553)EELEEK+Incorrect Mono 1Da	830	snf2h	snf2h_hand	21.3	FDWFLK(1743.7687)SR+Incorrect Mono 1Da	992	snf2h	snf2h_slide	3.7	positional variants	45.9	3.8	adpbefx	2.8
1092.01	4	-0.9	Z20170518-31a_filtered	40.11	1	1002.4328-GSM(Oxidation)SSAAEPPPPPPPESAPSKPAASIASGGSNSSNK	1	snf2h	snf2h1	76	ENME(3343.5627)LEEK	1016	snf2h	snf2h5	10.3	unique	33.9	3.8	adpbefx	6.5
789.138	4	-0.4	Z20170518-33b_filtered	58.574	1	TPE(1298.6408)EVIEYSAVFWER	880	snf2h	snf2h_sant	42.7	K(1835.8730)ANYAVDAYFR	741	snf2h	snf2h_hand	37.6	unique	40.1	3.8	adpbefx	1.8
650.31	5	0.1	Z20170518-33a_filtered	43.937	1	NFTMDTESSVYNFEGED(942.5763)YR+Incorrect Mono 1Da	720	snf2h	snf2h4	12.9	APK(2284.9219)APRPPK+Incorrect Mono 1Da	763	snf2h	snf2h_hand	0.8	positional variants	47.6	3.8	adpbefx	1.7
1042.76	4	-0.5	Z20170518-31a_filtered	46.358	1	821.4436-GSMSSAAEPPPPPPPESAPSKPAASIASGGSNSSNK	1	snf2h	snf2h1	68	E(3327.5677)ILFYR	790	snf2h	snf2h_hand	7	unique	35	3.8	adpbefx	12
650.31	5	0.1	Z20170518-33a_filtered	43.937	1	NFTMDTESSVYNFEGE(942.5763)DYR+Incorrect Mono 1Da	719	snf2h	snf2h4	12.9	APK(2284.9219)APRPPK+Incorrect Mono 1Da	763	snf2h	snf2h_hand	0.8	positional variants	47.6	3.8	adpbefx	2.7
790.747	3	-0.7	Z20170518-33a_filtered	36.677	1	NPE(1088.5648)LPNAAQAQK+Incorrect Mono 1Da	807	snf2h	snf2h_hand	24.7	LSK(1261.6415)MGESSLR+Incorrect Mono 1Da	696	snf2h	snf2h_negc	10.4	unique	45.6	3.8	adpbefx	8
694.758	5	0.5	Z20170518-33b_filtered	37.088	1	RTEQEEDE(1546.8766)ELLTESSK	154	snf2h	snf2h_auton	47	TPTSPLK(1903.8647)MKPGRPR	121	snf2h	snf2h_auton	32.5	unique	37.6	3.8	adpbefx	8.8
962.763	4	-1.1	Z20170518-31a_filtered	82.875	1	VGAGAPVYLAAVLEYLTAE(931.4433)ILELAGNAAR+Incorrect Mono 1Da	61	h2a	h2a_ap	49.2	K(2896.5698)TAEMNEK+Incorrect Mono 1Da	686	snf2h	snf2h_negc	3.9	unique	41.3	3.8	adpbefx	6
1206.07	4	1.5	Z20170518-33b_filtered	40.864	1	1458.6515-GSM(Oxidation)SSAAEPPPPPPPESAPSKPAASIASGGSNSSNK	1	snf2h	snf2h1	71.8	EIQE(3343.5627)PDPTYEEK	77	snf2h	snf2h1	23	positional variants	37.7	3.8	adpbefx	9.9
789.389	4	0.3	Z20170518-33b_filtered	58.863	1	K(1835.8730)ANYAVDAYFR+Incorrect Mono 1Da	741	snf2h	snf2h_hand	31.2	TPEE(1298.6408)VIEYSAVFWER+Incorrect Mono 1Da	881	snf2h	snf2h_sant	30.8	positional variants	40.4	3.8	adpbefx	1.8
676.96	5	0.3	Z20170518-31a_filtered	51.78	1	QTELFAHFIQPAAQK(926.4458)TPTSPLK+Incorrect Mono 1Da	114	snf2h	snf2h_auton	35.5	D(2434.3009)DIENIAR+Incorrect Mono 1Da	865	snf2h	snf2h_sant	13.7	unique	40.4	3.7	adpbefx	4.5
679.015	3	-1.2	Z20170518-33a_filtered	40.14	1	LSK(926.4458)MGESSLR+Incorrect Mono 1Da	696	snf2h	snf2h_negc	11.7	DDIE(1088.5648)NIAR+Incorrect Mono 1Da	868	snf2h	snf2h_sant	8.1	unique	49.7	3.7	adpbefx	3.3
1235.83	4	0.1	Z20170518-31a_filtered	54.121	1	1593.7320-GSMSSAAEPPPPPPPESAPSKPAASIASGGSNSSNK	1	snf2h	snf2h1	72.8	VLDILED(3327.5677)YC(Carbamidomethyl)MWR	519	snf2h	snf2h_reca2	15.8	positional variants	35	3.7	adpbefx	6.8
915.707	4	-0.4	Z20170518-33b_filtered	57.974	1	EVEGK(1261.6415)TPEEVIEYSAVFWER+Incorrect Mono 1Da	877	snf2h	snf2h_sant	44.6	NPE(2378.1430)LPNAAQAQK+Incorrect Mono 1Da	807	snf2h	snf2h_hand	21	unique	38.1	3.7	adpbefx	3
954.782	3	-0.3	Z20170518-33a_filtered	47.229	1	Q(Gln->pyro-Glu)DSINAYNE(1298.6408)PNSTK	549	snf2h	snf2h_reca2	58.6	K(1544.6743)ANYAVDAYFR	741	snf2h	snf2h_hand	29.7	unique	37.1	3.7	adpbefx	3
1055.53	4	0.6	Z20170518-31a_filtered	47.768	1	872.5008-GSMSSAAEPPPPPPPESAPSKPAASIASGGSNSSNK	1	snf2h	snf2h1	84	LFE(3327.5677)LLEK	785	snf2h	snf2h_hand	7.1	unique	31	3.7	adpbefx	17.5
948.657	6	1.4	Z20170518-31a_filtered	69.889	1	FQSSAVMALQEASEAYLVALFE(2247.1701)DTNLAAIHAK+Incorrect Mono 1Da	105	h3	h3	34.5	APRPPK(3419.7071)QPNVQDFQFFPPR+Incorrect Mono 1Da	769	snf2h	snf2h_hand	21.3	positional variants	46.7	3.7	adpbefx	3.5
1027.49	4	0.7	Z20170518-33b_filtered	40.76	1	760.3538-GSMSSAAEPPPPPPPESAPSKPAASIASGGSNSSNK	1	snf2h	snf2h1	78.5	MGE(3327.5677)SSLR	699	snf2h	snf2h_negc	3.9	unique	34	3.7	adpbefx	19
948.657	6	1.4	Z20170518-31a_filtered	69.889	1	FQSSAVMALQEASEAYLVALFED(2247.1701)TNLAAIHAK+Incorrect Mono 1Da	106	h3	h3	34.5	APRPPK(3419.7071)QPNVQDFQFFPPR+Incorrect Mono 1Da	769	snf2h	snf2h_hand	21.3	positional variants	46.7	3.7	adpbefx	1.5
976.209	3	0.7	Z20170518-33b_filtered	67.075	1	LFELLEK(1213.6489)EILFYR	789	snf2h	snf2h_hand	38	C(Carbamidomethyl)NTLITLIE(1693.9443)R	1011	snf2h	snf2h_slide	35.1	unique	39.5	3.7	adpbefx	2
1033.29	4	-0.7	Z20170518-31a_filtered	63.709	1	Q(Gln->pyro-Glu)TE(2417.2743)LFAHFIQPAAQK+Incorrect Mono 1Da	102	snf2h	snf2h_auton	34.7	Q(Gln->pyro-Glu)TELFAHFIQPAAQK(1692.8624)TPTSPLK+Incorrect Mono 1Da	114	snf2h	snf2h_auton	27.3	unique	42.8	3.7	adpbefx	5
777.052	3	-2.4	Z20170518-33a_filtered	41.402	1	STLHNWMSE(948.5029)FK+Incorrect Mono 1Da	249	snf2h	snf2h_reca1	10.8	ISYGTNK(1360.6234)GK+Incorrect Mono 1Da	945	snf2h	snf2h_slide	2.5	unique	46.9	3.7	adpbefx	2
1093.84	3	2.2	Z20170518-33b_filtered	42.503	1	Q(Gln->pyro-Glu)K(1561.7009)EIQEPDPTYEEK+Incorrect Mono 1Da	73	snf2h	snf2h1	22.2	QDSINAYNE(1697.7784)PNSTK+Incorrect Mono 1Da	549	snf2h	snf2h_reca2	12.3	unique	44.9	3.7	adpbefx	2.5
1255.25	3	2.3	Z20170518-33b_filtered	54.403	1	NFTMDTESSVYNFE(1458.7732)GEDYR+Incorrect Mono 1Da	717	snf2h	snf2h4	23	LLTQGFTNWNK(2284.9219)R+Incorrect Mono 1Da	849	snf2h	snf2h_sant	8.6	unique	43.2	3.7	adpbefx	3.5
822.636	5	1.5	Z20170518-32b_filtered	69.229	1	FQSSAVMALQEASEAYLVALFED(669.4174)TNLAAIHAK+Incorrect Mono 1Da	106	h3	h3	42.2	K(3419.7071)QLATK+Incorrect Mono 1Da	18	h3	h3_tail	6.3	positional variants	40.5	3.7	adpbefx	2
924.098	3	-0.2	Z20170518-33a_filtered	43.046	1	Q(Gln->pyro-Glu)K(1052.4815)EIQEPDPTYEEK+Incorrect Mono 1Da	73	snf2h	snf2h1	41	FE(1697.7784)DSPSYVK+Incorrect Mono 1Da	171	snf2h	snf2h2	11.3	unique	38	3.7	adpbefx	4
822.636	5	1.5	Z20170518-32b_filtered	69.229	1	FQSSAVMALQEASEAYLVALFE(669.4174)DTNLAAIHAK+Incorrect Mono 1Da	105	h3	h3	42.2	K(3419.7071)QLATK+Incorrect Mono 1Da	18	h3	h3_tail	6.3	positional variants	40.5	3.7	adpbefx	3
808.728	3	-0.2	Z20170518-33a_filtered	37.017	1	TEQEED(656.3857)EELLTESSK+Incorrect Mono 1Da	153	snf2h	snf2h_auton	26.8	K(1747.7636)ALDTK+Incorrect Mono 1Da	921	snf2h	snf2h_slide	7.8	positional variants	41.3	3.7	adpbefx	1.8
800.102	4	0.4	Z20170518-33b_filtered	45.283	1	NFTM(Oxidation)DTESSVYNFE(876.4454)GEDYR+Incorrect Mono 1Da	717	snf2h	snf2h4	17.7	EFK(2300.9168)TTNR+Incorrect Mono 1Da	330	snf2h	snf2h_reca1	3	unique	46	3.7	adpbefx	3.5
1033	4	1.4	Z20170518-31a_filtered	58.763	1	GGPEGVAAQAVASAASAGPADAE(854.4974)MEEIFDDASPGK+Incorrect Mono 1Da	59	snf2h	snf2h1	44	ALDTK(3254.4674)IGR+Incorrect Mono 1Da	926	snf2h	snf2h_slide	0.8	positional variants	45.3	3.7	adpbefx	2.6
571.11	5	0.4	Z20170518-33b_filtered	57.218	1	TLQTISLLGYMK(1026.5346)HYR+Incorrect Mono 1Da	225	snf2h	snf2h_reca1	13.4	D(1804.9658)IDILNSAGK+Incorrect Mono 1Da	433	snf2h	snf2h_reca2	10.8	positional variants	50	3.7	adpbefx	2
1018.88	5	-0.1	Z20170518-31a_filtered	44.892	1	1743.7687-GSMSSAAEPPPPPPPESAPSKPAASIASGGSNSSNK	1	snf2h	snf2h1	76.2	IDEAESLNDE(3327.5677)ELEEK	831	snf2h	snf2h_hand	20.6	positional variants	33	3.7	adpbefx	3.5
1018.88	5	-0.1	Z20170518-31a_filtered	44.892	1	1743.7687-GSMSSAAEPPPPPPPESAPSKPAASIASGGSNSSNK	1	snf2h	snf2h1	76.2	IDEAESLNDEE(3327.5677)LEEK	832	snf2h	snf2h_hand	20.6	positional variants	33	3.7	adpbefx	2.3
706.372	5	1.1	Z20170518-33b_filtered	47.24	1	APRPPK(1261.6415)QPNVQDFQFFPPR	769	snf2h	snf2h_hand	55.1	NPE(2247.1701)LPNAAQAQK	807	snf2h	snf2h_hand	31.2	unique	38.4	3.7	adpbefx	14
803.394	3	0.2	Z20170518-33a_filtered	41.595	1	TEQEE(640.3809)DEELLTESSK+Incorrect Mono 1Da	152	snf2h	snf2h_auton	30.1	WGK(1747.7636)LR+Incorrect Mono 1Da	181	snf2h	snf2h2	-2.3	unique	47.7	3.7	adpbefx	1.8
540.303	5	-1.2	Z20170518-33b_filtered	56.721	1	TLQTISLLGYMK(872.5008)HYR+Incorrect Mono 1Da	225	snf2h	snf2h_reca1	12.5	LFE(1804.9658)LLEK+Incorrect Mono 1Da	785	snf2h	snf2h_hand	9.6	unique	46.1	3.7	adpbefx	2
789.389	4	0.3	Z20170518-33b_filtered	58.863	1	TPEEVIE(1298.6408)YSAVFWER+Incorrect Mono 1Da	884	snf2h	snf2h_sant	31.4	K(1835.8730)ANYAVDAYFR+Incorrect Mono 1Da	741	snf2h	snf2h_hand	31.2	positional variants	38.8	3.7	adpbefx	2.3
1197.11	4	-0.5	Z20170518-31a_filtered	69.753	1	DVLLPGE(2417.2743)WDVC(Carbamidomethyl)VTSYEMLIK+Incorrect Mono 1Da	281	snf2h	snf2h_reca1	45.8	Q(Gln->pyro-Glu)TELFAHFIQPAAQK(2348.1432)TPTSPLK+Incorrect Mono 1Da	114	snf2h	snf2h_auton	29.1	unique	40.3	3.7	adpbefx	3
958.717	4	0.7	Z20170518-31a_filtered	37.921	1	469.2649-GSM(Oxidation)SSAAEPPPPPPPESAPSKPAASIASGGSNSSNK	1	snf2h	snf2h1	62.9	E(3343.5627)ALR	752	snf2h	snf2h_hand	0.8	unique	31.8	3.6	adpbefx	13.5
797.006	5	1.5	Z20170518-31a_filtered	58.452	1	FEYLLK(1458.6515)QTELFAHFIQPAAQK	99	snf2h	snf2h_auton	56.5	E(2503.3264)IQEPDPTYEEK	74	snf2h	snf2h1	39	unique	37.9	3.6	adpbefx	2.5
793.148	4	0	Z20170518-33b_filtered	61.872	1	TPEEVIE(1314.6788)YSAVFWER	884	snf2h	snf2h_sant	58.3	IGK(1835.8730)DEMLQMIR	649	snf2h	snf2h_negc	31.7	unique	36.2	3.6	adpbefx	2.5
737.106	4	1.9	Z20170518-33b_filtered	39.056	1	NPELPNAAQAQK(1036.4098)EEQLK+Incorrect Mono 1Da	816	snf2h	snf2h_hand	28.3	NYTE(1888.9643)EEDR+Incorrect Mono 1Da	951	snf2h	snf2h_slide	9.7	unique	41.1	3.6	adpbefx	2
797.002	5	0.9	Z20170518-31a_filtered	55.96	1	APRPPK(1714.7897)QPNVQDFQFFPPR	769	snf2h	snf2h_hand	53.4	ESE(2247.1701)ITDEDIDGILER	670	snf2h	snf2h_negc	34	positional variants	35.9	3.6	adpbefx	5.7
797.002	5	0.9	Z20170518-31a_filtered	55.96	1	APRPPK(1714.7897)QPNVQDFQFFPPR	769	snf2h	snf2h_hand	53.4	E(2247.1701)SEITDEDIDGILER	668	snf2h	snf2h_negc	33.1	positional variants	35.1	3.6	adpbefx	3.9
959.742	4	-1.1	Z20170518-31a_filtered	67.9	1	DVLLPGE(1467.7874)WDVC(Carbamidomethyl)VTSYEMLIK+Incorrect Mono 1Da	281	snf2h	snf2h_reca1	37	IAFTEWIEPPK(2348.1432)R+Incorrect Mono 1Da	737	snf2h	snf2h_hand	13.7	unique	37.2	3.6	adpbefx	2
1156.37	5	-0.3	Z20170518-31a_filtered	67.928	1	GGPEGVAAQAVASAASAGPADAEME(2503.3264)EIFDDASPGK+Incorrect Mono 1Da	61	snf2h	snf2h1	65.9	FEYLLK(3254.4674)QTELFAHFIQPAAQK+Incorrect Mono 1Da	99	snf2h	snf2h_auton	8.1	positional variants	36.6	3.6	adpbefx	2
911.027	5	-1.3	Z20170518-31a_filtered	55.26	1	NFTMDTESSVYNFE(2247.1701)GEDYR	717	snf2h	snf2h4	40.1	APRPPK(2284.9219)QPNVQDFQFFPPR	769	snf2h	snf2h_hand	33.5	unique	41.1	3.6	adpbefx	10.2
1156.37	5	-0.3	Z20170518-31a_filtered	67.928	1	GGPEGVAAQAVASAASAGPADAEMEE(2503.3264)IFDDASPGK+Incorrect Mono 1Da	62	snf2h	snf2h1	65.3	FEYLLK(3254.4674)QTELFAHFIQPAAQK+Incorrect Mono 1Da	99	snf2h	snf2h_auton	8.1	positional variants	36.6	3.6	adpbefx	2
1058.74	4	-1	Z20170518-31a_filtered	40.609	1	885.3439-GSMSSAAEPPPPPPPESAPSKPAASIASGGSNSSNK	1	snf2h	snf2h1	80.2	NYE(3327.5677)YC(Carbamidomethyl)R	527	snf2h	snf2h_reca2	3	unique	30.9	3.6	adpbefx	8
911.227	5	-1.7	Z20170518-31a_filtered	55.039	1	NFTMDTE(2247.1701)SSVYNFEGEDYR+Incorrect Mono 1Da	710	snf2h	snf2h4	32.1	APRPPK(2284.9219)QPNVQDFQFFPPR+Incorrect Mono 1Da	769	snf2h	snf2h_hand	30.6	unique	42.8	3.6	adpbefx	6.8
913.693	4	0.4	Z20170518-33b_filtered	46.323	1	EEQLK(1261.6415)IDEAESLNDEELEEK	821	snf2h	snf2h_hand	79.8	NPE(2371.0915)LPNAAQAQK	807	snf2h	snf2h_hand	25.1	unique	28.2	3.6	adpbefx	4.5
767.874	4	0.8	Z20170518-33b_filtered	55.418	1	ESEITD(1334.6619)EDIDGILER	673	snf2h	snf2h_negc	33.2	DFNQFIK(1714.7897)ANEK	857	snf2h	snf2h_sant	31.9	unique	40	3.6	adpbefx	3.5
947.936	4	-0.5	Z20170518-33b_filtered	56.234	1	NFTM(Oxidation)DTE(1467.7874)SSVYNFEGEDYR+Incorrect Mono 1Da	710	snf2h	snf2h4	25.7	IAFTEWIEPPK(2300.9168)R+Incorrect Mono 1Da	737	snf2h	snf2h_hand	18.6	positional variants	40.8	3.6	adpbefx	2
1095.52	4	-2.1	Z20170518-31a_filtered	44.901	1	1032.4732-GSMSSAAEPPPPPPPESAPSKPAASIASGGSNSSNK	1	snf2h	snf2h1	68.5	DE(3327.5677)MLQM(Oxidation)IR	651	snf2h	snf2h_negc	10.1	positional variants	36.3	3.6	adpbefx	7.5
1095.52	4	-2.1	Z20170518-31a_filtered	44.901	1	1032.4732-GSMSSAAEPPPPPPPESAPSKPAASIASGGSNSSNK	1	snf2h	snf2h1	68.5	D(3327.5677)EMLQM(Oxidation)IR	650	snf2h	snf2h_negc	10.1	positional variants	36.3	3.6	adpbefx	9.5
583.3	4	-1.7	Z20170518-33a_filtered	50.033	1	STLHNWMSEFK(793.4374)R+Incorrect Mono 1Da	251	snf2h	snf2h_reca1	12.4	FE(1516.7245)YLLK+Incorrect Mono 1Da	95	snf2h	snf2h_auton	8.6	unique	45	3.6	adpbefx	8
947.936	4	-0.5	Z20170518-33b_filtered	56.234	1	NFTM(Oxidation)D(1467.7874)TESSVYNFEGEDYR+Incorrect Mono 1Da	708	snf2h	snf2h4	25.7	IAFTEWIEPPK(2300.9168)R+Incorrect Mono 1Da	737	snf2h	snf2h_hand	18.6	positional variants	40.8	3.6	adpbefx	2
771.141	4	0.3	Z20170518-33b_filtered	63.839	1	VLDILE(1467.7874)DYC(Carbamidomethyl)MWR+Incorrect Mono 1Da	518	snf2h	snf2h_reca2	13.9	IAFTEWIEPPK(1593.7320)R+Incorrect Mono 1Da	737	snf2h	snf2h_hand	12.4	unique	41.1	3.6	adpbefx	2
766.113	4	0.9	Z20170518-33b_filtered	47.55	1	IDE(1298.6408)AESLNDEELEEK	824	snf2h	snf2h_hand	44.1	K(1743.7687)ANYAVDAYFR	741	snf2h	snf2h_hand	37.3	unique	38.6	3.6	adpbefx	2.2
647.319	4	-0.2	Z20170518-33a_filtered	35.466	1	IDEAE(822.4647)SLNDEELEEK+Incorrect Mono 1Da	826	snf2h	snf2h_hand	33.1	MK(1743.7687)PGRPR+Incorrect Mono 1Da	123	snf2h	snf2h_auton	2.4	unique	41.4	3.6	adpbefx	3.8
1003.47	4	1.4	Z20170518-33b_filtered	60.061	1	NFTMDTESSVYNFE(1706.9144)GEDYR	717	snf2h	snf2h4	58.2	Q(Gln->pyro-Glu)K(2284.9219)IAFTEWIEPPKR	726	snf2h	snf2h4	34.2	unique	37.8	3.6	adpbefx	2.5
1039.76	4	0.1	Z20170518-33b_filtered	44.291	1	793.4374-GSM(Oxidation)SSAAEPPPPPPPESAPSKPAASIASGGSNSSNK	1	snf2h	snf2h1	75.7	FE(3343.5627)YLLK	95	snf2h	snf2h_auton	3.9	unique	30.5	3.6	adpbefx	22
810.416	5	-0.7	Z20170518-31a_filtered	60.093	1	QTELFAHFIQPAAQK(1593.7320)TPTSPLK+Incorrect Mono 1Da	114	snf2h	snf2h_auton	20.9	VLDILED(2434.3009)YC(Carbamidomethyl)MWR+Incorrect Mono 1Da	519	snf2h	snf2h_reca2	18.1	unique	41.1	3.5	adpbefx	3
1068.8	4	3.5	Z20170518-31a_filtered	65.883	1	Q(Gln->pyro-Glu)TELFAHFIQPAAQK(1835.8730)TPTSPLK	114	snf2h	snf2h_auton	40	TPE(2417.2743)EVIEYSAVFWER	880	snf2h	snf2h_sant	33.9	positional variants	40.2	3.5	adpbefx	2
837.749	3	-1.6	Z20170518-33a_filtered	48.18	1	Q(Gln->pyro-Glu)K(793.4374)EIQEPDPTYEEK+Incorrect Mono 1Da	73	snf2h	snf2h1	43.4	FE(1697.7784)YLLK+Incorrect Mono 1Da	95	snf2h	snf2h_auton	4.5	unique	33.1	3.5	adpbefx	8
978.997	4	-1.9	Z20170518-31a_filtered	49.676	1	QTELFAHFIQPAAQK(1458.6515)TPTSPLK+Incorrect Mono 1Da	114	snf2h	snf2h_auton	25.9	E(2434.3009)IQEPDPTYEEK+Incorrect Mono 1Da	74	snf2h	snf2h1	25.9	unique	40.7	3.5	adpbefx	2
918.507	4	1.8	Z20170518-33b_filtered	83.166	1	VGAGAPVYLAAVLEYLTAEILE(754.4086)LAGNAAR+Incorrect Mono 1Da	64	h2a	h2a_ap	43.5	STGGK(2896.5698)APR+Incorrect Mono 1Da	14	h3	h3_tail	-2.3	unique	52.2	3.5	adpbefx	2
551.093	5	1.4	Z20170518-33b_filtered	54.18	1	TLQTISLLGYMK(926.4458)HYR+Incorrect Mono 1Da	225	snf2h	snf2h_reca1	16.4	D(1804.9658)DIENIAR+Incorrect Mono 1Da	865	snf2h	snf2h_sant	4.8	positional variants	46.8	3.5	adpbefx	1.8
749.609	4	-0.7	Z20170518-33b_filtered	47.621	1	E(1517.7474)IQEPDPTYEEK	74	snf2h	snf2h1	35.6	DEK(1458.6515)QNLLSVGDYR	134	snf2h	snf2h_auton	33	unique	40	3.5	adpbefx	3.2
551.093	5	1.4	Z20170518-33b_filtered	54.18	1	TLQTISLLGYMK(926.4458)HYR+Incorrect Mono 1Da	225	snf2h	snf2h_reca1	16.4	DDIE(1804.9658)NIAR+Incorrect Mono 1Da	868	snf2h	snf2h_sant	4.5	positional variants	46.8	3.5	adpbefx	1.3
551.093	5	1.4	Z20170518-33b_filtered	54.18	1	TLQTISLLGYMK(926.4458)HYR+Incorrect Mono 1Da	225	snf2h	snf2h_reca1	16.4	DD(1804.9658)IENIAR+Incorrect Mono 1Da	866	snf2h	snf2h_sant	4.5	positional variants	46.8	3.5	adpbefx	1.8
1181.31	4	-0.5	Z20170518-31a_filtered	60.521	1	Q(Gln->pyro-Glu)TELFAHFIQPAAQK(2284.9219)TPTSPLK+Incorrect Mono 1Da	114	snf2h	snf2h_auton	30.4	NFTMD(2417.2743)TESSVYNFEGEDYR+Incorrect Mono 1Da	708	snf2h	snf2h4	30.3	unique	42.8	3.5	adpbefx	2.5
707.581	5	0.5	Z20170518-31a_filtered	54.81	1	TLQTISLLGYMK(1709.8889)HYR	225	snf2h	snf2h_reca1	48.9	QTE(1804.9658)LFAHFIQPAAQK	102	snf2h	snf2h_auton	31.1	unique	37.4	3.5	adpbefx	7
948.267	4	-0.2	Z20170518-31a_filtered	62.301	1	VTIAQGGVLPNIQSVLLPK(1714.7897)K	118	h2a	h2a_ctail	56.5	ESE(2056.2408)ITDEDIDGILER	670	snf2h	snf2h_negc	30.4	positional variants	31.1	3.5	adpbefx	1.2
1068.28	4	1.2	Z20170518-31a_filtered	60.627	1	FEYLLK(1747.7636)QTELFAHFIQPAAQK	99	snf2h	snf2h_auton	39.8	TEQEE(2503.3264)DEELLTESSK	152	snf2h	snf2h_auton	38.8	unique	43.2	3.5	adpbefx	2.8
1019.9	5	-0.3	Z20170518-31a_filtered	59.716	1	GGPEGVAAQAVASAASAGPADAEM(Oxidation)E(1804.9658)EIFDDASPGK+Incorrect Mono 1Da	61	snf2h	snf2h1	47	TLQTISLLGYMK(3270.4623)HYR+Incorrect Mono 1Da	225	snf2h	snf2h_reca1	9.9	positional variants	36.3	3.5	adpbefx	2.1
1018.88	5	-0.1	Z20170518-31a_filtered	44.892	1	1743.7687-GSMSSAAEPPPPPPPESAPSKPAASIASGGSNSSNK	1	snf2h	snf2h1	76.2	IDEAESLND(3327.5677)EELEEK	830	snf2h	snf2h_hand	19.1	positional variants	31.3	3.5	adpbefx	2.9
1243.83	4	3.2	Z20170518-33b_filtered	61.81	1	GGPEGVAAQAVASAASAGPADAEMEEIFD(1697.7784)DASPGK+Incorrect Mono 1Da	65	snf2h	snf2h1	41.5	Q(Gln->pyro-Glu)K(3254.4674)EIQEPDPTYEEK+Incorrect Mono 1Da	73	snf2h	snf2h1	14.2	positional variants	33.7	3.5	adpbefx	8.1
1019.9	5	-0.3	Z20170518-31a_filtered	59.716	1	GGPEGVAAQAVASAASAGPADAEM(Oxidation)EE(1804.9658)IFDDASPGK+Incorrect Mono 1Da	62	snf2h	snf2h1	46	TLQTISLLGYMK(3270.4623)HYR+Incorrect Mono 1Da	225	snf2h	snf2h_reca1	9.9	positional variants	36.3	3.5	adpbefx	1.7
1025.94	5	-0.8	Z20170518-31a_filtered	71.934	1	GLNWLISLYENGINGILAD(2434.3009)EMGLGK+Incorrect Mono 1Da	207	snf2h	snf2h_reca1	42	QTELFAHFIQPAAQK(2671.3680)TPTSPLK+Incorrect Mono 1Da	114	snf2h	snf2h_auton	18.4	unique	33	3.5	adpbefx	3.7
968.143	3	0	Z20170518-33a_filtered	58.395	1	K(1583.7521)ANYAVDAYFR+Incorrect Mono 1Da	741	snf2h	snf2h_hand	23.1	Q(Gln->pyro-Glu)PNVQD(1298.6408)FQFFPPR+Incorrect Mono 1Da	775	snf2h	snf2h_hand	20.1	unique	43.5	3.5	adpbefx	6
1019.9	5	-0.3	Z20170518-31a_filtered	59.716	1	GGPEGVAAQAVASAASAGPAD(1804.9658)AEM(Oxidation)EEIFDDASPGK+Incorrect Mono 1Da	57	snf2h	snf2h1	45.4	TLQTISLLGYMK(3270.4623)HYR+Incorrect Mono 1Da	225	snf2h	snf2h_reca1	9.9	positional variants	36.3	3.5	adpbefx	3.4
1019.9	5	-0.3	Z20170518-31a_filtered	59.716	1	GGPEGVAAQAVASAASAGPADAE(1804.9658)M(Oxidation)EEIFDDASPGK+Incorrect Mono 1Da	59	snf2h	snf2h1	45.4	TLQTISLLGYMK(3270.4623)HYR+Incorrect Mono 1Da	225	snf2h	snf2h_reca1	9.9	positional variants	36.3	3.5	adpbefx	3.6
848.432	5	-2	Z20170518-31a_filtered	64.56	1	FEYLLK(1714.7897)QTELFAHFIQPAAQK+Incorrect Mono 1Da	99	snf2h	snf2h_auton	52.5	ESE(2503.3264)ITDEDIDGILER+Incorrect Mono 1Da	670	snf2h	snf2h_negc	25.3	positional variants	37.1	3.5	adpbefx	1.7
747.085	4	0.9	Z20170518-33b_filtered	40.202	1	GK(1743.7687)NYTEEEDR+Incorrect Mono 1Da	947	snf2h	snf2h_slide	22.9	IDEAESLNDEE(1221.5262)LEEK+Incorrect Mono 1Da	832	snf2h	snf2h_hand	11.3	positional variants	39.2	3.5	adpbefx	1.1
747.085	4	0.9	Z20170518-33b_filtered	40.202	1	GK(1743.7687)NYTEEEDR+Incorrect Mono 1Da	947	snf2h	snf2h_slide	22.9	IDEAESLNDE(1221.5262)ELEEK+Incorrect Mono 1Da	831	snf2h	snf2h_hand	11.3	positional variants	39.2	3.5	adpbefx	1.1
1231.83	4	1.1	Z20170518-31a_filtered	39.802	1	1561.7009-GSM(Oxidation)SSAAEPPPPPPPESAPSKPAASIASGGSNSSNK	1	snf2h	snf2h1	54.6	QD(3343.5627)SINAYNEPNSTK	542	snf2h	snf2h_reca2	22.3	unique	34	3.5	adpbefx	8
635.573	4	-0.6	Z20170518-33a_filtered	50.221	1	IGK(1204.5724)DEMLQMIR+Incorrect Mono 1Da	649	snf2h	snf2h_negc	21.6	FITD(1314.6788)NTVEER+Incorrect Mono 1Da	612	snf2h	snf2h_reca2	18.6	unique	44	3.5	adpbefx	4
848.432	5	-2	Z20170518-31a_filtered	64.56	1	FEYLLK(1714.7897)QTELFAHFIQPAAQK+Incorrect Mono 1Da	99	snf2h	snf2h_auton	52.5	E(2503.3264)SEITDEDIDGILER+Incorrect Mono 1Da	668	snf2h	snf2h_negc	24.4	positional variants	36.2	3.4	adpbefx	1.7
665.579	4	0.5	Z20170518-33b_filtered	37.926	1	IDE(896.5080)AESLNDEELEEK	824	snf2h	snf2h_hand	65.4	K(1743.7687)SAPATGGVK	27	h3	h3_tail	25.8	unique	31.4	3.4	adpbefx	2.5
784.632	4	-0.8	Z20170518-33b_filtered	57.254	1	ESE(1400.6970)ITDEDIDGILER+Incorrect Mono 1Da	670	snf2h	snf2h_negc	41.1	DIDILNSAGK(1714.7897)MDK+Incorrect Mono 1Da	442	snf2h	snf2h_reca2	6.8	positional variants	38.4	3.4	adpbefx	1.5
748.083	4	-0.5	Z20170518-33a_filtered	37.333	1	TEQEEDE(1221.5262)ELLTESSK+Incorrect Mono 1Da	154	snf2h	snf2h_auton	35.6	GK(1747.7636)NYTEEEDR+Incorrect Mono 1Da	947	snf2h	snf2h_slide	24.9	positional variants	38.2	3.4	adpbefx	1.3
1274.59	4	-1.5	Z20170518-33b_filtered	44.372	1	1747.7636-GSMSSAAEPPPPPPPESAPSKPAASIASGGSNSSNK+Incorrect Mono 1Da	1	snf2h	snf2h1	76.5	TE(3327.5677)QEEDEELLTESSK+Incorrect Mono 1Da	149	snf2h	snf2h_auton	26.9	positional variants	31.2	3.4	adpbefx	5
790.616	4	0	Z20170518-33b_filtered	50.357	1	NFTMDTESSVYNFE(854.4974)GEDYR+Incorrect Mono 1Da	717	snf2h	snf2h4	21.5	ALDTK(2284.9219)IGR+Incorrect Mono 1Da	926	snf2h	snf2h_slide	-2.9	positional variants	41.4	3.4	adpbefx	1.8
790.616	4	0	Z20170518-33b_filtered	50.357	1	NFTMDTESSVYNFEGED(854.4974)YR+Incorrect Mono 1Da	720	snf2h	snf2h4	17.8	ALDTK(2284.9219)IGR+Incorrect Mono 1Da	926	snf2h	snf2h_slide	-2.9	positional variants	41.4	3.4	adpbefx	1.3
585.117	5	0.4	Z20170518-33b_filtered	52.102	1	TLQTISLLGYMK(1096.5665)HYR+Incorrect Mono 1Da	225	snf2h	snf2h_reca1	19.9	YLVIDE(1804.9658)AHR+Incorrect Mono 1Da	311	snf2h	snf2h_reca1	4.6	positional variants	42.6	3.4	adpbefx	4.5
585.117	5	0.4	Z20170518-33b_filtered	52.102	1	TLQTISLLGYMK(1096.5665)HYR+Incorrect Mono 1Da	225	snf2h	snf2h_reca1	19.9	YLVID(1804.9658)EAHR+Incorrect Mono 1Da	310	snf2h	snf2h_reca1	4.6	positional variants	42.6	3.4	adpbefx	7.5
1051.99	4	-0.8	Z20170518-33b_filtered	38	1	842.3770-GSM(Oxidation)SSAAEPPPPPPPESAPSKPAASIASGGSNSSNK	1	snf2h	snf2h1	72.8	ND(3343.5627)EELNK	90	h2a	h2a_ap	5.5	positional variants	29	3.4	adpbefx	4.7
1051.99	4	-0.8	Z20170518-33b_filtered	38	1	842.3770-GSM(Oxidation)SSAAEPPPPPPPESAPSKPAASIASGGSNSSNK	1	snf2h	snf2h1	72.8	NDE(3343.5627)ELNK	91	h2a	h2a_ap	5.5	positional variants	29	3.4	adpbefx	4.7
1055.53	4	0	Z20170518-31a_filtered	48.511	1	872.5008-GSMSSAAEPPPPPPPESAPSKPAASIASGGSNSSNK	1	snf2h	snf2h1	80.9	LFELLE(3327.5677)K	788	snf2h	snf2h_hand	2.8	unique	27.9	3.4	adpbefx	12
948.267	4	-0.2	Z20170518-31a_filtered	62.301	1	VTIAQGGVLPNIQSVLLPK(1714.7897)K	118	h2a	h2a_ctail	56.5	E(2056.2408)SEITDEDIDGILER	668	snf2h	snf2h_negc	29.5	positional variants	29.9	3.4	adpbefx	1.4
1011.75	4	-0.1	Z20170518-31a_filtered	41.94	1	697.4123-GSMSSAAEPPPPPPPESAPSKPAASIASGGSNSSNK	1	snf2h	snf2h1	74.3	LSE(3327.5677)IVR	324	snf2h	snf2h_reca1	0.8	unique	30.9	3.4	adpbefx	17
1077.22	4	0.3	Z20170518-33b_filtered	51.887	1	NFTMDTE(2000.9062)SSVYNFEGEDYR+Incorrect Mono 1Da	710	snf2h	snf2h4	33.7	IDEAESLNDEELEEK(2284.9219)EK+Incorrect Mono 1Da	836	snf2h	snf2h_hand	24.1	unique	37.5	3.4	adpbefx	3
953.723	4	1.2	Z20170518-33b_filtered	51.449	1	APRPPK(1544.6743)QPNVQDFQFFPPR+Incorrect Mono 1Da	769	snf2h	snf2h_hand	39.5	Q(Gln->pyro-Glu)DSINAYNE(2247.1701)PNSTK+Incorrect Mono 1Da	549	snf2h	snf2h_reca2	15.7	unique	37.6	3.4	adpbefx	3
727.728	3	-0.2	Z20170518-33a_filtered	44.085	1	C(Carbamidomethyl)NTLITLIE(948.5029)R	1011	snf2h	snf2h_slide	45.5	ISYGTNK(1213.6489)GK	945	snf2h	snf2h_slide	27.1	unique	35.7	3.4	adpbefx	3
793.911	4	2.1	Z20170518-33b_filtered	62.16	1	E(1693.9443)IQEPDPTYEEK+Incorrect Mono 1Da	74	snf2h	snf2h1	31.3	LFELLEK(1458.6515)EILFYR+Incorrect Mono 1Da	789	snf2h	snf2h_hand	20.1	unique	40.5	3.4	adpbefx	1.5
913.944	4	0.2	Z20170518-33b_filtered	44.344	1	NPELPNAAQAQK(1743.7687)EEQLK+Incorrect Mono 1Da	816	snf2h	snf2h_hand	37.8	IDEAESLND(1888.9643)EELEEK+Incorrect Mono 1Da	830	snf2h	snf2h_hand	16.3	positional variants	32.2	3.4	adpbefx	1.5
749.633	4	0.1	Z20170518-33b_filtered	52.768	1	TPEEVIE(1140.6192)YSAVFWER	884	snf2h	snf2h_sant	62.8	YK(1835.8730)APFHQLR	931	snf2h	snf2h_slide	27.5	unique	32.2	3.3	adpbefx	4.5
784.632	4	-0.8	Z20170518-33b_filtered	57.254	1	E(1400.6970)SEITDEDIDGILER+Incorrect Mono 1Da	668	snf2h	snf2h_negc	40.1	DIDILNSAGK(1714.7897)MDK+Incorrect Mono 1Da	442	snf2h	snf2h_reca2	6.8	positional variants	37.4	3.3	adpbefx	1.5
882.665	4	-2.1	Z20170518-33b_filtered	50.387	1	NFTMDTESSVYNFE(1222.7034)GEDYR+Incorrect Mono 1Da	717	snf2h	snf2h4	22.3	LVDQNLNK(2284.9219)IGK+Incorrect Mono 1Da	646	snf2h	snf2h_negc	9.3	unique	40.2	3.3	adpbefx	1.2
1000.25	4	-1.5	Z20170518-31a_filtered	54.452	1	Q(Gln->pyro-Glu)TELFAHFIQPAAQK(1561.7009)TPTSPLK	114	snf2h	snf2h_auton	44	QD(2417.2743)SINAYNEPNSTK	542	snf2h	snf2h_reca2	29.7	unique	36.3	3.3	adpbefx	3
1006.04	4	-0.2	Z20170518-32b_filtered	83.309	1	VGAGAPVYLAAVLEYLTAE(1104.5597)ILELAGNAAR+Incorrect Mono 1Da	61	h2a	h2a_ap	42.2	LSK(2896.5698)M(Oxidation)GESSLR+Incorrect Mono 1Da	696	snf2h	snf2h_negc	2.5	unique	39.5	3.3	adpbefx	3
901.308	7	2	Z20170518-31a_filtered	78.5	1	K(2896.5698)C(Carbamidomethyl)C(Carbamidomethyl)NHPYLFDGAEPGPPYTTDMHLVTNSGK	457	snf2h	snf2h_reca2	51.5	VGAGAPVYLAAVLE(3387.5111)YLTAEILELAGNAAR	56	h2a	h2a_ap	37.7	positional variants	42.7	3.3	adpbefx	3
727.203	6	-0.6	Z20170518-31a_filtered	49.226	1	QTELFAHFIQPAAQK(1903.8647)TPTSPLK+Incorrect Mono 1Da	114	snf2h	snf2h_auton	35.8	RTEQEEDEE(2434.3009)LLTESSK+Incorrect Mono 1Da	155	snf2h	snf2h_auton	14.5	positional variants	36.2	3.3	adpbefx	3.7
837.416	3	-2.1	Z20170518-33a_filtered	42.389	1	SVC(Carbamidomethyl)LIGDK(1204.5724)EQR+Incorrect Mono 1Da	266	snf2h	snf2h_reca1	12.6	FITDNTVEE(1285.6449)R+Incorrect Mono 1Da	617	snf2h	snf2h_reca2	2.5	unique	45	3.3	adpbefx	1.5
1016.48	5	-2.2	Z20170518-31a_filtered	48.834	1	1714.7897-GSM(Oxidation)SSAAEPPPPPPPESAPSKPAASIASGGSNSSNK+Incorrect Mono 1Da	1	snf2h	snf2h1	75.9	ESE(3343.5627)ITDEDIDGILER+Incorrect Mono 1Da	670	snf2h	snf2h_negc	25.4	positional variants	33.5	3.3	adpbefx	8.1
704.346	4	-0.7	Z20170518-33a_filtered	59.144	1	ESEITDEDIDGILE(1079.5553)R+Incorrect Mono 1Da	681	snf2h	snf2h_negc	17.1	FDWFLK(1714.7897)SR+Incorrect Mono 1Da	992	snf2h	snf2h_slide	1.1	unique	37.6	3.3	adpbefx	1.5
1004.5	5	1.2	Z20170518-31a_filtered	61.383	1	GGPEGVAAQAVASAASAGPAD(1743.9883)AEMEEIFDDASPGK+Incorrect Mono 1Da	57	snf2h	snf2h1	39.3	LLLPGELAK(3254.4674)HAVSEGTK+Incorrect Mono 1Da	105	h2b	h2b_ap	7.9	positional variants	37.9	3.3	adpbefx	1.3
1004.5	5	1.2	Z20170518-31a_filtered	61.383	1	GGPEGVAAQAVASAASAGPADAE(1743.9883)MEEIFDDASPGK+Incorrect Mono 1Da	59	snf2h	snf2h1	39.3	LLLPGELAK(3254.4674)HAVSEGTK+Incorrect Mono 1Da	105	h2b	h2b_ap	7.9	positional variants	37.9	3.3	adpbefx	1.5
1004.5	5	1.2	Z20170518-31a_filtered	61.383	1	GGPEGVAAQAVASAASAGPADAEME(1743.9883)EIFDDASPGK+Incorrect Mono 1Da	61	snf2h	snf2h1	39.3	LLLPGELAK(3254.4674)HAVSEGTK+Incorrect Mono 1Da	105	h2b	h2b_ap	7.9	positional variants	37.9	3.3	adpbefx	1.5
1002.73	4	-0.7	Z20170518-31a_filtered	40.332	1	661.3184-GSMSSAAEPPPPPPPESAPSKPAASIASGGSNSSNK	1	snf2h	snf2h1	63.2	D(3327.5677)YQVR	184	snf2h	snf2h_reca1	3.9	unique	30.3	3.3	adpbefx	11.5
974.492	4	0.5	Z20170518-33b_filtered	55.874	1	Q(Gln->pyro-Glu)TELFAHFIQPAAQK(1458.6515)TPTSPLK	114	snf2h	snf2h_auton	45.6	EIQEPDPTYEE(2417.2743)K	84	snf2h	snf2h_auton	31.1	unique	32.1	3.3	adpbefx	1.5
613.569	4	-0.3	Z20170518-33a_filtered	36.715	1	NPELPNAAQAQK(542.2700)EEQLK+Incorrect Mono 1Da	816	snf2h	snf2h_hand	26.9	E(1888.9643)VEGK+Incorrect Mono 1Da	873	snf2h	snf2h_sant	-2.9	positional variants	40	3.3	adpbefx	2.5
873.201	4	1.4	Z20170518-33b_filtered	55.359	1	Q(Gln->pyro-Glu)TELFAHFIQPAAQK(1052.4815)TPTSPLK+Incorrect Mono 1Da	114	snf2h	snf2h_auton	42.7	FE(2417.2743)DSPSYVK+Incorrect Mono 1Da	171	snf2h	snf2h2	-1.7	positional variants	41.9	3.3	adpbefx	4.5
873.201	4	1.4	Z20170518-33b_filtered	55.359	1	Q(Gln->pyro-Glu)TELFAHFIQPAAQK(1052.4815)TPTSPLK+Incorrect Mono 1Da	114	snf2h	snf2h_auton	42.7	FED(2417.2743)SPSYVK+Incorrect Mono 1Da	172	snf2h	snf2h2	-1.7	positional variants	41.9	3.3	adpbefx	5.5
913.24	4	-0.4	Z20170518-31a_filtered	61.398	1	Q(Gln->pyro-Glu)TELFAHFIQPAAQK(1213.6489)TPTSPLK	114	snf2h	snf2h_auton	61	C(Carbamidomethyl)NTLITLIE(2417.2743)R	1011	snf2h	snf2h_slide	28.6	unique	29.6	3.3	adpbefx	8
1004.5	5	1.2	Z20170518-31a_filtered	61.383	1	GGPEGVAAQAVASAASAGPADAEMEE(1743.9883)IFDDASPGK+Incorrect Mono 1Da	62	snf2h	snf2h1	38.7	LLLPGELAK(3254.4674)HAVSEGTK+Incorrect Mono 1Da	105	h2b	h2b_ap	7.9	positional variants	37.9	3.3	adpbefx	1.2
644.85	4	1	Z20170518-33b_filtered	46.629	1	IAFTE(1088.5648)WIEPPKR+Incorrect Mono 1Da	731	snf2h	snf2h4	24.9	LSK(1467.7874)MGESSLR+Incorrect Mono 1Da	696	snf2h	snf2h_negc	16	unique	41.9	3.3	adpbefx	5.5
1252.64	5	1.2	Z20170518-32b_filtered	82.007	1	VGAGAPVYLAAVLE(3343.5627)YLTAEILELAGNAAR	56	h2a	h2a_ap	30.9	2896.5698-GSM(Oxidation)SSAAEPPPPPPPESAPSKPAASIASGGSNSSNK	1	snf2h	snf2h1	24.9	positional variants	28	3.3	adpbefx	1.8
993.485	3	0.6	Z20170518-33b_filtered	42.189	1	NPE(1697.7784)LPNAAQAQK	807	snf2h	snf2h_hand	39.4	Q(Gln->pyro-Glu)K(1261.6415)EIQEPDPTYEEK	73	snf2h	snf2h1	35.9	unique	39.7	3.3	adpbefx	5
979.155	3	0.6	Z20170518-33b_filtered	62.864	1	TPEEVIE(1079.5553)YSAVFWER+Incorrect Mono 1Da	884	snf2h	snf2h_sant	37.4	FDWFLK(1835.8730)SR+Incorrect Mono 1Da	992	snf2h	snf2h_slide	2.7	unique	36.4	3.3	adpbefx	3
602.817	4	1	Z20170518-33b_filtered	54.379	1	STLHNWMSEFK(872.5008)R	251	snf2h	snf2h_reca1	36.5	LFELLE(1516.7245)K	788	snf2h	snf2h_hand	28.9	unique	35.6	3.3	adpbefx	3
641.008	3	-0.9	Z20170518-35_filtered	37.81	1	LLTQGFTNWNK(442.2176)R+Incorrect Mono 1Da	849	snf2h	snf2h_sant	4.3	ANE(1458.7732)K+Incorrect Mono 1Da	860	snf2h	snf2h_sant	-3.8	unique	49.6	3.3	adpbefx	5
955.795	3	1.7	Z20170518-33b_filtered	48.298	1	E(1131.5594)SEITDEDIDGILER	668	snf2h	snf2h_negc	50.9	TAEMNEK(1714.7897)LSK	693	snf2h	snf2h_negc	25	unique	33.4	3.3	adpbefx	1.5
655.083	4	-2.2	Z20170518-33a_filtered	51.227	1	IAFTEWIEPPK(1129.5074)R+Incorrect Mono 1Da	737	snf2h	snf2h_hand	12.2	C(Carbamidomethyl)NELQDIE(1467.7874)K+Incorrect Mono 1Da	900	snf2h	snf2h_slide	-0.9	unique	45.7	3.3	adpbefx	3
984.671	5	-0.5	Z20170518-31a_filtered	60.328	1	GGPEGVAAQAVASAASAGPADAEME(1645.8424)EIFDDASPGK	61	snf2h	snf2h1	102.1	KDEK(3254.4674)QNLLSVGDYR	134	snf2h	snf2h_auton	16.1	positional variants	23.3	3.3	adpbefx	2.4
700.837	4	-1.5	Z20170518-33a_filtered	35.079	1	RTEQEEDEE(876.4454)LLTESSK+Incorrect Mono 1Da	155	snf2h	snf2h_auton	24.8	EFK(1903.8647)TTNR+Incorrect Mono 1Da	330	snf2h	snf2h_reca1	5.7	unique	40.7	3.2	adpbefx	2
985.877	5	0.4	Z20170518-31a_filtered	46.293	1	1578.7678-GSMSSAAEPPPPPPPESAPSKPAASIASGGSNSSNK	1	snf2h	snf2h1	72.4	LGFDKENVYD(3327.5677)ELR	973	snf2h	snf2h_slide	4.5	positional variants	26.4	3.2	adpbefx	7.6
985.877	5	0.4	Z20170518-31a_filtered	46.293	1	1578.7678-GSMSSAAEPPPPPPPESAPSKPAASIASGGSNSSNK	1	snf2h	snf2h1	72.4	LGFDKENVYDE(3327.5677)LR	974	snf2h	snf2h_slide	4.5	positional variants	26.4	3.2	adpbefx	8.2
748.083	4	-0.5	Z20170518-33a_filtered	37.333	1	TEQEED(1221.5262)EELLTESSK+Incorrect Mono 1Da	153	snf2h	snf2h_auton	29.9	GK(1747.7636)NYTEEEDR+Incorrect Mono 1Da	947	snf2h	snf2h_slide	24.9	positional variants	36.6	3.2	adpbefx	1.3
628.06	4	-2.1	Z20170518-33a_filtered	31.35	1	TEQEEDEE(741.4385)LLTESSK+Incorrect Mono 1Da	155	snf2h	snf2h_auton	22.1	IK(1747.7636)KDEK+Incorrect Mono 1Da	130	snf2h	snf2h_auton	0.8	positional variants	43.5	3.2	adpbefx	1.2
628.06	4	-2.1	Z20170518-33a_filtered	31.35	1	TEQEEDEE(741.4385)LLTESSK+Incorrect Mono 1Da	155	snf2h	snf2h_auton	22.1	IKK(1747.7636)DEK+Incorrect Mono 1Da	131	snf2h	snf2h_auton	0.8	positional variants	43.5	3.2	adpbefx	3.1
573.8	4	-1.6	Z20170518-33a_filtered	48.573	1	SK(1360.6234)LSEIVR	321	snf2h	snf2h_reca1	38.9	STLHNWMSE(912.5393)FK	249	snf2h	snf2h_reca1	30.1	unique	34.6	3.2	adpbefx	3
638.342	5	0.6	Z20170518-33b_filtered	51.72	1	QTE(1458.7732)LFAHFIQPAAQK	102	snf2h	snf2h_auton	37.2	LLTQGFTNWNK(1709.8889)R	849	snf2h	snf2h_sant	29.9	unique	35.6	3.2	adpbefx	2
653.668	3	-0.5	Z20170518-33a_filtered	49.11	1	K(695.3279)ESYAIYVYK	31	h2b	h2b_tail	29.5	TLYGFGG-1244.6441	102	h4	h4	2.1	unique	36.4	3.2	adpbefx	2
1040.52	4	0.7	Z20170518-33b_filtered	44.56	1	812.4756-GSMSSAAEPPPPPPPESAPSKPAASIASGGSNSSNK	1	snf2h	snf2h1	70.5	STE(3327.5677)LLIR	59	h3	h3	3.9	unique	28.3	3.2	adpbefx	7
1197.34	4	-1.1	Z20170518-31a_filtered	63.905	1	GGPEGVAAQAVASAASAGPAD(1511.8381)AEMEEIFDDASPGK+Incorrect Mono 1Da	57	snf2h	snf2h1	73.4	ILMK(3254.4674)DIDILNSAGK+Incorrect Mono 1Da	432	snf2h	snf2h_reca2	13.2	unique	30.6	3.2	adpbefx	3.6
967.786	3	-0.7	Z20170518-33b_filtered	45.035	1	E(1423.6772)IQEPDPTYEEK	74	snf2h	snf2h1	33	FEDSPSYVK(1458.6515)WGK	178	snf2h	snf2h2	32.4	unique	35.2	3.2	adpbefx	3
941.435	4	0.9	Z20170518-33b_filtered	54.247	1	NFTMDTE(1458.7732)SSVYNFEGEDYR	710	snf2h	snf2h4	48.4	LLTQGFTNWNK(2284.9219)R	849	snf2h	snf2h_sant	28.9	unique	31.7	3.2	adpbefx	3.5
1095.52	4	1.3	Z20170518-31a_filtered	53.74	1	GGPEGVAAQAVASAASAGPADAE(1088.5648)M(Oxidation)EEIFDDASPGK+Incorrect Mono 1Da	59	snf2h	snf2h1	51.6	LSK(3270.4623)MGESSLR+Incorrect Mono 1Da	696	snf2h	snf2h_negc	-0.7	unique	37.4	3.2	adpbefx	2
1064.16	3	2.5	Z20170518-33b_filtered	47.073	1	TEQEEDEELLTE(1423.6772)SSK	159	snf2h	snf2h_auton	46.4	FEDSPSYVK(1747.7636)WGK	178	snf2h	snf2h2	28.7	unique	31.1	3.2	adpbefx	2
1243.57	4	1	Z20170518-32b_filtered	61.659	1	GGPEGVAAQAVASAASAGPADAEME(1697.7784)EIFDDASPGK	61	snf2h	snf2h1	86.8	Q(Gln->pyro-Glu)K(3254.4674)EIQEPDPTYEEK	73	snf2h	snf2h1	21.6	positional variants	24.2	3.2	adpbefx	8.3
731.565	5	-1.8	Z20170518-31a_filtered	43.972	1	TEQE(1887.0214)EDEELLTESSK	151	snf2h	snf2h_auton	35.9	IKK(1747.7636)DEKQNLLSVGDYR	131	snf2h	snf2h_auton	33	positional variants	39.9	3.2	adpbefx	4.1
731.565	5	-1.8	Z20170518-31a_filtered	43.972	1	TEQE(1887.0214)EDEELLTESSK	151	snf2h	snf2h_auton	35.9	IKKDEK(1747.7636)QNLLSVGDYR	134	snf2h	snf2h_auton	33	positional variants	39.9	3.2	adpbefx	4.1
1099.91	3	0.7	Z20170518-33b_filtered	71.25	1	LFELLEK(1583.7521)EILFYR+Incorrect Mono 1Da	789	snf2h	snf2h_hand	23.9	Q(Gln->pyro-Glu)PNVQD(1693.9443)FQFFPPR+Incorrect Mono 1Da	775	snf2h	snf2h_hand	23.4	unique	37.4	3.2	adpbefx	7
787.343	4	-1.6	Z20170518-33b_filtered	40.455	1	EIQEPDPTYEEK(1036.4098)MQTDR+Incorrect Mono 1Da	85	snf2h	snf2h_auton	21.6	NYTE(2089.9262)EEDR+Incorrect Mono 1Da	951	snf2h	snf2h_slide	3.6	positional variants	40.1	3.2	adpbefx	2
628.744	5	0.2	Z20170518-33b_filtered	53.949	1	APRPPK(872.5008)QPNVQDFQFFPPR+Incorrect Mono 1Da	769	snf2h	snf2h_hand	22.4	LFE(2247.1701)LLEK+Incorrect Mono 1Da	785	snf2h	snf2h_hand	4.5	unique	34.5	3.2	adpbefx	14
886.25	5	1.9	Z20170518-31a_filtered	57.693	1	FEYLLK(1903.8647)QTELFAHFIQPAAQK+Incorrect Mono 1Da	99	snf2h	snf2h_auton	46	RTEQE(2503.3264)EDEELLTESSK+Incorrect Mono 1Da	151	snf2h	snf2h_auton	18.6	positional variants	37.9	3.2	adpbefx	2.8
837.079	3	0	Z20170518-33b_filtered	23.911	1	TEQEEDE(741.4385)ELLTESSK+Incorrect Mono 1Da	154	snf2h	snf2h_auton	25.6	IK(1747.7636)KDEK+Incorrect Mono 1Da	130	snf2h	snf2h_auton	9.3	unique	32.7	3.2	adpbefx	6.7
1235.88	3	-2.5	Z20170518-33b_filtered	55.919	1	NFTMDTE(1400.6970)SSVYNFEGEDYR+Incorrect Mono 1Da	710	snf2h	snf2h4	32.8	DIDILNSAGK(2284.9219)MDK+Incorrect Mono 1Da	442	snf2h	snf2h_reca2	4.6	unique	38	3.2	adpbefx	1.5
790.071	3	-1.4	Z20170518-33a_filtered	41.497	1	FEDSPSYVK(924.5029)WGK+Incorrect Mono 1Da	178	snf2h	snf2h2	14.5	LVD(1423.6772)QNLNK+Incorrect Mono 1Da	641	snf2h	snf2h_reca2	7	unique	42	3.2	adpbefx	2
731.565	5	-1.8	Z20170518-31a_filtered	43.972	1	TEQEE(1887.0214)DEELLTESSK	152	snf2h	snf2h_auton	34.7	IKK(1747.7636)DEKQNLLSVGDYR	131	snf2h	snf2h_auton	33	positional variants	38.8	3.1	adpbefx	3.8
731.565	5	-1.8	Z20170518-31a_filtered	43.972	1	TEQEE(1887.0214)DEELLTESSK	152	snf2h	snf2h_auton	34.7	IKKDEK(1747.7636)QNLLSVGDYR	134	snf2h	snf2h_auton	33	positional variants	38.8	3.1	adpbefx	3.7
621.061	4	-1.4	Z20170518-33a_filtered	44.622	1	LLTQGFTNWNK(1002.4328)R+Incorrect Mono 1Da	849	snf2h	snf2h_sant	7.2	ENME(1458.7732)LEEK+Incorrect Mono 1Da	1016	snf2h	snf2h5	4	positional variants	41.5	3.1	adpbefx	3.5
897.742	3	-1	Z20170518-33b_filtered	39.218	1	IDE(927.4232)AESLNDEELEEK+Incorrect Mono 1Da	824	snf2h	snf2h_hand	31.9	K(1743.7687)MDGAPDGR+Incorrect Mono 1Da	1038	snf2h	snf2h5	12.5	unique	36	3.1	adpbefx	2
821.148	4	1	Z20170518-33b_filtered	42.775	1	IDEAESLNDEELEEK(1261.6415)EK	836	snf2h	snf2h_hand	73	NPE(2000.9062)LPNAAQAQK	807	snf2h	snf2h_hand	24.2	unique	26.5	3.1	adpbefx	1.5
569.497	5	-1.4	Z20170518-33b_filtered	53.438	1	E(1804.9658)NVYDELR+Incorrect Mono 1Da	969	snf2h	snf2h_slide	14.5	TLQTISLLGYMK(1018.4720)HYR+Incorrect Mono 1Da	225	snf2h	snf2h_reca1	13.4	unique	41.8	3.1	adpbefx	5.3
923.673	5	0.6	Z20170518-31a_filtered	63.953	1	DVLLPGE(2247.1701)WDVC(Carbamidomethyl)VTSYEMLIK	281	snf2h	snf2h_reca1	38.2	APRPPK(2348.1432)QPNVQDFQFFPPR	769	snf2h	snf2h_hand	30.6	unique	39.1	3.1	adpbefx	2
628.06	4	-2.1	Z20170518-33a_filtered	31.35	1	TEQEEDE(741.4385)ELLTESSK+Incorrect Mono 1Da	154	snf2h	snf2h_auton	22.1	IKK(1747.7636)DEK+Incorrect Mono 1Da	131	snf2h	snf2h_auton	0.8	positional variants	42	3.1	adpbefx	5.9
996.251	4	0.3	Z20170518-33b_filtered	56.131	1	APRPPK(1714.7897)QPNVQDFQFFPPR+Incorrect Mono 1Da	769	snf2h	snf2h_hand	22.8	ESEITDE(2247.1701)DIDGILER+Incorrect Mono 1Da	674	snf2h	snf2h_negc	18.3	positional variants	41.5	3.1	adpbefx	2.9
813.894	4	-0.7	Z20170518-33b_filtered	56.697	1	DEK(1714.7897)QNLLSVGDYR+Incorrect Mono 1Da	134	snf2h	snf2h_auton	26.9	ESEITD(1517.7474)EDIDGILER+Incorrect Mono 1Da	673	snf2h	snf2h_negc	25.1	positional variants	37.8	3.1	adpbefx	1.8
893.446	3	0.2	Z20170518-33b_filtered	43.002	1	IDE(914.5338)AESLNDEELEEK+Incorrect Mono 1Da	824	snf2h	snf2h_hand	37.1	TIGYK(1743.7687)VPR+Incorrect Mono 1Da	801	snf2h	snf2h_hand	5.2	unique	36.6	3.1	adpbefx	3
1408.88	4	0.3	Z20170518-31a_filtered	50.248	1	2284.9219-GSMSSAAEPPPPPPPESAPSKPAASIASGGSNSSNK+Incorrect Mono 1Da	1	snf2h	snf2h1	53.9	NFTMDTESSVYNFE(3327.5677)GEDYR+Incorrect Mono 1Da	717	snf2h	snf2h4	29.6	positional variants	35	3.1	adpbefx	2.7
655.959	5	-0.4	Z20170518-33b_filtered	53.903	1	QTELFAHFIQPAAQK(821.4436)TPTSPLK+Incorrect Mono 1Da	114	snf2h	snf2h_auton	30.1	E(2434.3009)ILFYR+Incorrect Mono 1Da	790	snf2h	snf2h_hand	4.8	unique	35	3.1	adpbefx	7
675.127	4	-0.1	Z20170518-33a_filtered	58.361	1	TLQTISLLGYMK(872.5008)HYR+Incorrect Mono 1Da	225	snf2h	snf2h_reca1	11.8	LFELLE(1804.9658)K+Incorrect Mono 1Da	788	snf2h	snf2h_hand	1.3	unique	41.7	3.1	adpbefx	8
895.113	3	-1.6	Z20170518-33a_filtered	63.257	1	Q(Gln->pyro-Glu)PNVQD(1079.5553)FQFFPPR+Incorrect Mono 1Da	775	snf2h	snf2h_hand	17.9	FDWFLK(1583.7521)SR+Incorrect Mono 1Da	992	snf2h	snf2h_slide	6.2	unique	40.7	3.1	adpbefx	5
613.049	4	-1.2	Z20170518-33a_filtered	34.542	1	IDE(685.3871)AESLNDEELEEK+Incorrect Mono 1Da	824	snf2h	snf2h_hand	39.2	TK(1743.7687)QTAR+Incorrect Mono 1Da	4	h3	h3_tail	5.7	positional variants	30.8	3.1	adpbefx	3.3
640.569	4	-1	Z20170518-33a_filtered	46.111	1	DFNQFIK(1204.5724)ANEK+Incorrect Mono 1Da	857	snf2h	snf2h_sant	16.9	FITD(1334.6619)NTVEER+Incorrect Mono 1Da	612	snf2h	snf2h_reca2	10.5	unique	40.3	3.1	adpbefx	2
613.049	4	-1.2	Z20170518-33a_filtered	34.542	1	ID(685.3871)EAESLNDEELEEK+Incorrect Mono 1Da	823	snf2h	snf2h_hand	39.2	TK(1743.7687)QTAR+Incorrect Mono 1Da	4	h3	h3_tail	5.7	positional variants	30.8	3.1	adpbefx	1.3
889.422	3	-0.7	Z20170518-33b_filtered	45.615	1	ESEITD(931.4433)EDIDGILER+Incorrect Mono 1Da	673	snf2h	snf2h_negc	21.4	K(1714.7897)TAEMNEK+Incorrect Mono 1Da	686	snf2h	snf2h_negc	12.7	positional variants	39.4	3.1	adpbefx	2.5
585.953	3	0.2	Z20170518-33a_filtered	23.072	1	K(809.4032)MDGAPDGR	1038	snf2h	snf2h5	34.5	HAVSE(927.4232)GTK	110	h2b	h2b_ap	26.1	unique	33.8	3.1	adpbefx	3
789.075	3	-0.7	Z20170518-33a_filtered	38.437	1	FITD(1140.6192)NTVEER+Incorrect Mono 1Da	612	snf2h	snf2h_reca2	15.1	YK(1204.5724)APFHQLR+Incorrect Mono 1Da	931	snf2h	snf2h_slide	13.8	unique	41.8	3.1	adpbefx	3
1025.94	5	-2.3	Z20170518-31a_filtered	71.263	1	GLNWLISLYE(2434.3009)NGINGILADEMGLGK+Incorrect Mono 1Da	198	snf2h	snf2h_reca1	47.9	QTELFAHFIQPAAQK(2671.3680)TPTSPLK+Incorrect Mono 1Da	114	snf2h	snf2h_auton	26.1	unique	29.2	3.1	adpbefx	3.7
899.101	5	2.1	Z20170518-31a_filtered	83.25	1	VGAGAPVYLAAVLEYLTAE(1575.8807)ILELAGNAAR	61	h2a	h2a_ap	84.1	RK(2896.5698)TVTAMDVVYALK	79	h4	h4	17	unique	28.6	3.1	adpbefx	8
665.861	6	-0.4	Z20170518-31a_filtered	60.402	1	FEYLLK(1467.7874)QTELFAHFIQPAAQK	99	snf2h	snf2h_auton	60.7	IAFTE(2503.3264)WIEPPKR	731	snf2h	snf2h4	27.6	unique	33.8	3.1	adpbefx	5.5
1060.51	4	-1.3	Z20170518-31a_filtered	45.461	1	892.4443-GSMSSAAEPPPPPPPESAPSKPAASIASGGSNSSNK	1	snf2h	snf2h1	70.5	D(3327.5677)FNQFIK	851	snf2h	snf2h_sant	10.1	unique	29.7	3.1	adpbefx	6
1144.79	4	-0.3	Z20170518-31a_filtered	54.848	1	GGPEGVAAQAVASAASAGPAD(1285.6449)AEM(Oxidation)EEIFDDASPGK+Incorrect Mono 1Da	57	snf2h	snf2h1	58.9	SVC(Carbamidomethyl)LIGDK(3270.4623)EQR+Incorrect Mono 1Da	266	snf2h	snf2h_reca1	1.2	unique	32.7	3.1	adpbefx	2
886.25	5	1.9	Z20170518-31a_filtered	57.693	1	FEYLLK(1903.8647)QTELFAHFIQPAAQK+Incorrect Mono 1Da	99	snf2h	snf2h_auton	46	RTE(2503.3264)QEEDEELLTESSK+Incorrect Mono 1Da	149	snf2h	snf2h_auton	17.6	positional variants	37.3	3.1	adpbefx	1.1
1033.36	5	0.9	Z20170518-31a_filtered	82.326	1	VGAGAPVYLAAVLEYLTAE(2247.1701)ILELAGNAAR	61	h2a	h2a_ap	90.5	APRPPK(2896.5698)QPNVQDFQFFPPR	769	snf2h	snf2h_hand	23.7	unique	28.5	3.1	adpbefx	2
950.783	4	-1.2	Z20170518-33b_filtered	83.46	1	VGAGAPVYLAAVLEYLTAE(883.5240)ILELAGNAAR+Incorrect Mono 1Da	61	h2a	h2a_ap	50.2	IGQTK(2896.5698)TVR+Incorrect Mono 1Da	602	snf2h	snf2h_reca2	1.4	unique	37.6	3.1	adpbefx	13.3
886.249	5	1.2	Z20170518-31a_filtered	58.944	1	FEYLLK(1903.8647)QTELFAHFIQPAAQK+Incorrect Mono 1Da	99	snf2h	snf2h_auton	47.1	RTEQEEDEELLTE(2503.3264)SSK+Incorrect Mono 1Da	159	snf2h	snf2h_auton	16.2	unique	33.9	3	adpbefx	4
886.25	5	1.9	Z20170518-31a_filtered	57.693	1	FEYLLK(1903.8647)QTELFAHFIQPAAQK+Incorrect Mono 1Da	99	snf2h	snf2h_auton	46	RTEQEEDE(2503.3264)ELLTESSK+Incorrect Mono 1Da	154	snf2h	snf2h_auton	17.1	positional variants	36.4	3	adpbefx	1.1
745.974	5	-0.5	Z20170518-33b_filtered	48.703	1	APRPPK(1458.6515)QPNVQDFQFFPPR+Incorrect Mono 1Da	769	snf2h	snf2h_hand	29.1	E(2247.1701)IQEPDPTYEEK+Incorrect Mono 1Da	74	snf2h	snf2h1	27.7	unique	37.8	3	adpbefx	5.5
443.229	5	-0.4	Z20170518-33a_filtered	37.982	1	YK(1052.4815)APFHQLR	931	snf2h	snf2h_slide	30.8	FE(1140.6192)DSPSYVK	171	snf2h	snf2h2	26.4	unique	31	3	adpbefx	2
798.393	4	-1.6	Z20170518-33b_filtered	61.016	1	TPEE(1334.6619)VIEYSAVFWER+Incorrect Mono 1Da	881	snf2h	snf2h_sant	35.1	DFNQFIK(1835.8730)ANEK+Incorrect Mono 1Da	857	snf2h	snf2h_sant	13.7	unique	36.4	3	adpbefx	1.5
1213.82	4	0.7	Z20170518-31a_filtered	63.385	1	GGPEGVAAQAVASAASAGPAD(1578.7678)AEMEEIFDDASPGK	57	snf2h	snf2h1	105.7	LGFDK(3254.4674)ENVYDELR	968	snf2h	snf2h_slide	13.2	positional variants	21.7	3	adpbefx	1.5
662.739	5	0.7	Z20170518-33b_filtered	39.417	1	IDEAE(1546.8766)SLNDEELEEK	826	snf2h	snf2h_hand	58.5	TPTSPLK(1743.7687)MKPGRPR	121	snf2h	snf2h_auton	21.1	unique	28	3	adpbefx	4.5
797.205	5	-0.8	Z20170518-31a_filtered	59.978	1	FEYLLK(1458.6515)QTELFAHFIQPAAQK+Incorrect Mono 1Da	99	snf2h	snf2h_auton	53.1	EIQEPDPTYE(2503.3264)EK+Incorrect Mono 1Da	83	snf2h	snf2h1	8.2	positional variants	33.4	3	adpbefx	5.9
797.205	5	-0.8	Z20170518-31a_filtered	59.978	1	FEYLLK(1458.6515)QTELFAHFIQPAAQK+Incorrect Mono 1Da	99	snf2h	snf2h_auton	53.1	EIQEPDPTYEE(2503.3264)K+Incorrect Mono 1Da	84	snf2h	snf2h_auton	8.2	positional variants	33.4	3	adpbefx	5.7
639.079	4	1.6	Z20170518-33b_filtered	35.05	1	NPE(1271.6258)LPNAAQAQK+Incorrect Mono 1Da	807	snf2h	snf2h_hand	27.2	DAVTYTEHAK(1261.6415)R+Incorrect Mono 1Da	77	h4	h4	9.9	unique	36.8	3	adpbefx	2
1063.16	3	1.7	Z20170518-33b_filtered	47.199	1	IDE(1423.6772)AESLNDEELEEK+Incorrect Mono 1Da	824	snf2h	snf2h_hand	22.3	FEDSPSYVK(1743.7687)WGK+Incorrect Mono 1Da	178	snf2h	snf2h2	10.4	unique	36.1	3	adpbefx	1.5
859.878	4	-3.5	Z20170518-33b_filtered	48.778	1	NFTMDTESSVYNFE(1131.5594)GEDYR+Incorrect Mono 1Da	717	snf2h	snf2h4	25.5	TAEMNEK(2284.9219)LSK+Incorrect Mono 1Da	693	snf2h	snf2h_negc	2.5	unique	38.1	3	adpbefx	1.5
658.092	4	0.5	Z20170518-33b_filtered	55.7	1	K(1311.6863)ANYAVDAYFR	741	snf2h	snf2h_hand	36	IAFTEWIE(1298.6408)PPK	734	snf2h	snf2h4	25.6	unique	32	3	adpbefx	8.5
1233.34	4	-0.5	Z20170518-31a_filtered	53.847	1	1583.7521-GSMSSAAEPPPPPPPESAPSKPAASIASGGSNSSNK	1	snf2h	snf2h1	71.1	Q(Gln->pyro-Glu)PNVQD(3327.5677)FQFFPPR	775	snf2h	snf2h_hand	20.8	unique	30.6	3	adpbefx	9
1175.3	4	0.9	Z20170518-31a_filtered	60.998	1	GGPEGVAAQAVASAASAGPADAEMEE(1423.6772)IFDDASPGK+Incorrect Mono 1Da	62	snf2h	snf2h1	59.6	FEDSPSYVK(3254.4674)WGK+Incorrect Mono 1Da	178	snf2h	snf2h2	-2.2	positional variants	32.7	3	adpbefx	1.8
731.565	5	-1.8	Z20170518-31a_filtered	43.972	1	TEQE(1887.0214)EDEELLTESSK	151	snf2h	snf2h_auton	35.9	IK(1747.7636)KDEKQNLLSVGDYR	130	snf2h	snf2h_auton	31.4	positional variants	38.3	3	adpbefx	5
1156.17	5	1.3	Z20170518-31a_filtered	67.232	1	GGPEGVAAQAVASAASAGPADAE(2503.3264)MEEIFDDASPGK	59	snf2h	snf2h1	105.8	FEYLLK(3254.4674)QTELFAHFIQPAAQK	99	snf2h	snf2h_auton	14.8	unique	21.7	3	adpbefx	2.5
590.833	4	0.8	Z20170518-33b_filtered	58.224	1	IAFTEWIEPPK(872.5008)R+Incorrect Mono 1Da	737	snf2h	snf2h_hand	10.7	LFELLE(1467.7874)K+Incorrect Mono 1Da	788	snf2h	snf2h_hand	1.9	unique	37.4	3	adpbefx	2
972.97	4	0.4	Z20170518-33b_filtered	38.403	1	542.2700-GSMSSAAEPPPPPPPESAPSKPAASIASGGSNSSNK	1	snf2h	snf2h1	64.1	E(3327.5677)VEGK	873	snf2h	snf2h_sant	3.9	unique	24.7	3	adpbefx	12.8
1175.3	4	0.9	Z20170518-31a_filtered	60.998	1	GGPEGVAAQAVASAASAGPADAEME(1423.6772)EIFDDASPGK+Incorrect Mono 1Da	61	snf2h	snf2h1	56.5	FEDSPSYVK(3254.4674)WGK+Incorrect Mono 1Da	178	snf2h	snf2h2	-2.2	positional variants	32.7	3	adpbefx	1.8
802.797	5	0.2	Z20170518-31a_filtered	51.198	1	APRPPK(1743.7687)QPNVQDFQFFPPR	769	snf2h	snf2h_hand	47.4	IDEAE(2247.1701)SLNDEELEEK	826	snf2h	snf2h_hand	24.6	unique	32.5	3	adpbefx	5
963.681	5	0.3	Z20170518-33b_filtered	48.277	1	1467.7874-GSMSSAAEPPPPPPPESAPSKPAASIASGGSNSSNK	1	snf2h	snf2h1	74.2	IAFTE(3327.5677)WIEPPKR	731	snf2h	snf2h4	11.7	unique	25.6	3	adpbefx	19
678.329	4	-0.9	Z20170518-33a_filtered	31.783	1	IDEAE(946.5084)SLNDEELEEK+Incorrect Mono 1Da	826	snf2h	snf2h_hand	38.4	KTESSK(1743.7687)SAK+Incorrect Mono 1Da	124	h2a	h2a_ctail	14.8	unique	35.3	3	adpbefx	4
836.145	4	1.2	Z20170518-33b_filtered	52.344	1	IDEAESLND(1578.7678)EELEEK	830	snf2h	snf2h_hand	70	LGFDK(1743.7687)ENVYDELR	968	snf2h	snf2h_slide	22.6	positional variants	27.2	3	adpbefx	1.5
1021.5	4	0.2	Z20170518-33b_filtered	61.56	1	DVLLPGE(1714.8050)WDVC(Carbamidomethyl)VTSYEMLIK+Incorrect Mono 1Da	281	snf2h	snf2h_reca1	40.3	QK(2348.1432)EIQEPDPTYEEK+Incorrect Mono 1Da	73	snf2h	snf2h1	32.5	unique	36.4	3	adpbefx	2.5
1015.24	4	-1.2	Z20170518-31a_filtered	56.221	1	GGPEGVAAQAVASAASAGPADAE(783.4491)MEEIFDDASPGK+Incorrect Mono 1Da	59	snf2h	snf2h1	52.9	IK(3254.4674)ADVEK+Incorrect Mono 1Da	399	snf2h	snf2h_reca1	-1.4	unique	40.3	3	adpbefx	2.1
705.604	4	1.2	Z20170518-33b_filtered	36.018	1	RTEQEEDEELLTE(896.5080)SSK	159	snf2h	snf2h_auton	57.9	K(1903.8647)SAPATGGVK	27	h3	h3_tail	23.6	unique	28.9	3	adpbefx	2
554.9	5	0.8	Z20170518-33b_filtered	36.584	1	FITD(1546.8766)NTVEER	612	snf2h	snf2h_reca2	32.4	TPTSPLK(1204.5724)MKPGRPR	121	snf2h	snf2h_auton	29.4	unique	34.8	3	adpbefx	4.5
726.859	4	1.9	Z20170518-33b_filtered	42.237	1	IDE(1140.6192)AESLNDEELEEK+Incorrect Mono 1Da	824	snf2h	snf2h_hand	38.9	YK(1743.7687)APFHQLR+Incorrect Mono 1Da	931	snf2h	snf2h_slide	10.7	positional variants	35.3	3	adpbefx	2.3
999.818	3	0.1	Z20170518-33b_filtered	51.925	1	NFTMDTESSVYNFE(692.4949)GEDYR+Incorrect Mono 1Da	717	snf2h	snf2h4	19.2	LLPK(2284.9219)LK+Incorrect Mono 1Da	496	snf2h	snf2h_reca2	-1.7	unique	43.5	3	adpbefx	6
774.37	3	-0.3	Z20170518-33a_filtered	43.042	1	K(1002.4328)ANYAVDAYFR+Incorrect Mono 1Da	741	snf2h	snf2h_hand	25.8	E(1298.6408)NMELEEK+Incorrect Mono 1Da	1013	snf2h	snf2h_slide	18.9	unique	34.9	3	adpbefx	3
1055.51	4	0.8	Z20170518-31a_filtered	43.621	1	872.4426-GSMSSAAEPPPPPPPESAPSKPAASIASGGSNSSNK	1	snf2h	snf2h1	67	SVC(Carbamidomethyl)LIGD(3327.5677)K	265	snf2h	snf2h_reca1	2.4	unique	25.2	3	adpbefx	6
1121.2	5	-0.7	Z20170518-31a_filtered	68.795	1	Q(Gln->pyro-Glu)PNVQDFQFFPPRLFELLEKE(2304.2702)ILFYR+Incorrect Mono 1Da	790	snf2h	snf2h_hand	31.9	K(3277.6964)TIGYKVPRNPELPNAAQAQK+Incorrect Mono 1Da	796	snf2h	snf2h_hand	18.2	positional variants	36.1	3	adpbefx	37.6
674.34	3	-0.6	Z20170518-33a_filtered	34.482	1	FE(948.5029)DSPSYVK+Incorrect Mono 1Da	171	snf2h	snf2h2	11.7	ISYGTNK(1052.4815)GK+Incorrect Mono 1Da	945	snf2h	snf2h_slide	3.2	unique	40.4	3	adpbefx	3.5
1121.2	5	-0.7	Z20170518-31a_filtered	68.795	1	Q(Gln->pyro-Glu)PNVQDFQFFPPRLFELLEKE(2304.2702)ILFYR+Incorrect Mono 1Da	790	snf2h	snf2h_hand	31.9	KTIGYK(3277.6964)VPRNPELPNAAQAQK+Incorrect Mono 1Da	801	snf2h	snf2h_hand	17.9	positional variants	36.1	3	adpbefx	13.7
869.036	5	-2	Z20170518-31a_filtered	54.205	1	Q(Gln->pyro-Glu)TELFAHFIQPAAQK(1903.8647)TPTSPLK+Incorrect Mono 1Da	114	snf2h	snf2h_auton	23.6	RTEQE(2417.2743)EDEELLTESSK+Incorrect Mono 1Da	151	snf2h	snf2h_auton	9.8	positional variants	37.3	2.9	adpbefx	2.6
869.036	5	-2	Z20170518-31a_filtered	54.205	1	Q(Gln->pyro-Glu)TELFAHFIQPAAQK(1903.8647)TPTSPLK+Incorrect Mono 1Da	114	snf2h	snf2h_auton	23.6	RTEQEE(2417.2743)DEELLTESSK+Incorrect Mono 1Da	152	snf2h	snf2h_auton	9.2	positional variants	37.3	2.9	adpbefx	3.6
779.73	3	0.6	Z20170518-33a_filtered	38.948	1	TEQEE(569.3901)DEELLTESSK+Incorrect Mono 1Da	152	snf2h	snf2h_auton	28.9	ISIK(1747.7636)K+Incorrect Mono 1Da	920	snf2h	snf2h_slide	-2.6	positional variants	43	2.9	adpbefx	2.5
789.137	4	-1.5	Z20170518-33b_filtered	59.834	1	K(1835.8730)ANYAVDAYFR	741	snf2h	snf2h_hand	36.4	TPEEVIEYSAVFWE(1298.6408)R	891	snf2h	snf2h_sant	32.5	unique	31.8	2.9	adpbefx	2
774.084	3	-1.8	Z20170518-33a_filtered	45.25	1	LLTQGFTNWNK(841.4480)R+Incorrect Mono 1Da	849	snf2h	snf2h_sant	6.3	IMAQIE(1458.7732)R+Incorrect Mono 1Da	907	snf2h	snf2h_slide	-2.5	unique	46.9	2.9	adpbefx	8
1111.86	4	-0.3	Z20170518-31a_filtered	83.472	1	VGAGAPVYLAAVLEYLTAE(1527.8331)ILELAGNAAR+Incorrect Mono 1Da	61	h2a	h2a_ap	50.5	ILM(Oxidation)K(2896.5698)DIDILNSAGK+Incorrect Mono 1Da	432	snf2h	snf2h_reca2	16.9	unique	33.5	2.9	adpbefx	4.5
821.219	5	0.9	Z20170518-33b_filtered	59.766	1	APRPPK(1835.8730)QPNVQDFQFFPPR	769	snf2h	snf2h_hand	50.3	TPEE(2247.1701)VIEYSAVFWER	881	snf2h	snf2h_sant	30.7	unique	33.3	2.9	adpbefx	5.8
572.075	4	0.4	Z20170518-33b_filtered	39.542	1	RC(Carbamidomethyl)NTLITLIE(896.5080)R	1011	snf2h	snf2h_slide	29.1	K(1369.7500)SAPATGGVK	27	h3	h3_tail	25	unique	33.4	2.9	adpbefx	5
665.345	4	2	Z20170518-33a_filtered	54.623	1	IAFTEWIEPPK(1170.5458)R+Incorrect Mono 1Da	737	snf2h	snf2h_hand	11.9	ANYAVD(1467.7874)AYFR+Incorrect Mono 1Da	747	snf2h	snf2h_hand	6.8	unique	36	2.9	adpbefx	6.3
958.455	4	-0.4	Z20170518-33b_filtered	44.979	1	TEQEEDEELLTESSK(1261.6415)ATNVC(Carbamidomethyl)TR	162	snf2h	snf2h2	81.2	NPE(2550.1392)LPNAAQAQK	807	snf2h	snf2h_hand	18.2	unique	26.5	2.9	adpbefx	2
739.363	4	-0.4	Z20170518-33b_filtered	44.733	1	IYVGLSK(1743.7687)M(Oxidation)QR	420	snf2h	snf2h_reca2	37.8	IDEAE(1191.6434)SLNDEELEEK	826	snf2h	snf2h_hand	35.5	unique	35	2.9	adpbefx	2
650.31	5	0	Z20170518-33b_filtered	44.335	1	NFTMDTESSVYNFE(942.5763)GEDYR+Incorrect Mono 1Da	717	snf2h	snf2h4	20.9	APK(2284.9219)APRPPK+Incorrect Mono 1Da	763	snf2h	snf2h_hand	-1.7	unique	44.1	2.9	adpbefx	6.7
642.347	4	1.7	Z20170518-33b_filtered	56.151	1	IAFTE(1079.5553)WIEPPKR	731	snf2h	snf2h4	38.9	FDWFLK(1467.7874)SR	992	snf2h	snf2h_slide	30.1	unique	34.9	2.9	adpbefx	4
1038.24	4	-0.1	Z20170518-31a_filtered	38.95	1	803.3484-GSMSSAAEPPPPPPPESAPSKPAASIASGGSNSSNK	1	snf2h	snf2h1	62.5	TAE(3327.5677)MNEK	689	snf2h	snf2h_negc	3.9	unique	25.6	2.9	adpbefx	11.8
731.767	5	0.4	Z20170518-31a_filtered	44.439	1	IK(1747.7636)KDEKQNLLSVGDYR+Incorrect Mono 1Da	130	snf2h	snf2h_auton	25.1	TEQEE(1887.0214)DEELLTESSK+Incorrect Mono 1Da	152	snf2h	snf2h_auton	23.6	positional variants	40	2.9	adpbefx	4.9
734.866	4	0.5	Z20170518-33b_filtered	46.354	1	LLTQGFTNWNK(1458.6515)R	849	snf2h	snf2h_sant	29.1	E(1458.7732)IQEPDPTYEEK	74	snf2h	snf2h1	25.5	positional variants	33.6	2.9	adpbefx	1.8
942.248	5	0.2	Z20170518-31a_filtered	46.136	1	1360.6234-GSMSSAAEPPPPPPPESAPSKPAASIASGGSNSSNK	1	snf2h	snf2h1	83.9	STLHNWMSE(3327.5677)FK	249	snf2h	snf2h_reca1	2.5	unique	21.7	2.9	adpbefx	5.5
798.144	4	0	Z20170518-33b_filtered	60.397	1	TPEEVIE(1334.6619)YSAVFWER	884	snf2h	snf2h_sant	29.1	DFNQFIK(1835.8730)ANEK	857	snf2h	snf2h_sant	27.3	unique	34.7	2.9	adpbefx	3
561.103	5	0.5	Z20170518-33b_filtered	55.18	1	IAFTE(1314.6788)WIEPPKR	731	snf2h	snf2h4	47	IGK(1467.7874)DEMLQMIR	649	snf2h	snf2h_negc	31.4	unique	33.8	2.9	adpbefx	4
807.201	5	-0.4	Z20170518-31a_filtered	47.808	1	HGATHVFASK(1261.6415)ESEITDEDIDGILER+Incorrect Mono 1Da	667	snf2h	snf2h_negc	48.6	NPE(2750.3148)LPNAAQAQK+Incorrect Mono 1Da	807	snf2h	snf2h_hand	14.8	unique	35.1	2.9	adpbefx	4
1027.82	3	0.8	Z20170518-33b_filtered	50.011	1	DEK(1544.6743)QNLLSVGDYR	134	snf2h	snf2h_auton	30.7	Q(Gln->pyro-Glu)DSINAYNE(1517.7474)PNSTK	549	snf2h	snf2h_reca2	30.2	unique	36.2	2.9	adpbefx	1.5
747.649	4	-0.5	Z20170518-33b_filtered	51.556	1	Q(Gln->pyro-Glu)K(1261.6415)IAFTEWIEPPKR	726	snf2h	snf2h4	40.2	NPE(1706.9144)LPNAAQAQK	807	snf2h	snf2h_hand	26.6	unique	34.8	2.9	adpbefx	3
687.361	3	0.7	Z20170518-33a_filtered	33.69	1	FITD(836.4756)NTVEER	612	snf2h	snf2h_reca2	36.2	VSEPK(1204.5724)APK	760	snf2h	snf2h_hand	26.4	unique	34.3	2.9	adpbefx	5
808.156	7	-2.2	Z20170518-31a_filtered	77.437	1	VGAGAPVYLAAVLEYLTAE(2734.4694)ILELAGNAAR+Incorrect Mono 1Da	61	h2a	h2a_ap	52.7	KESYAIYVYK(2896.5698)VLKQVHPDTGISSK+Incorrect Mono 1Da	40	h2b	h2b	20.6	unique	31.8	2.9	adpbefx	5.3
861.189	4	2.6	Z20170518-33b_filtered	61.092	1	ESE(1706.9144)ITDEDIDGILER+Incorrect Mono 1Da	670	snf2h	snf2h_negc	32.9	Q(Gln->pyro-Glu)K(1714.7897)IAFTEWIEPPKR+Incorrect Mono 1Da	726	snf2h	snf2h4	24.1	positional variants	35.3	2.9	adpbefx	2.2
1198.56	4	-1.7	Z20170518-31a_filtered	63.512	1	GGPEGVAAQAVASAASAGPADAEMEEIFD(1517.7474)DASPGK	65	snf2h	snf2h1	88.7	DEK(3254.4674)QNLLSVGDYR	134	snf2h	snf2h_auton	13.6	positional variants	21.6	2.9	adpbefx	1.4
918.405	3	-1.8	Z20170518-33a_filtered	39.496	1	Q(Gln->pyro-Glu)K(1036.4098)EIQEPDPTYEEK	73	snf2h	snf2h1	58.1	NYTE(1697.7784)EEDR	951	snf2h	snf2h_slide	18.1	positional variants	25.5	2.9	adpbefx	1.8
937.751	4	0.8	Z20170518-33b_filtered	62.743	1	Q(Gln->pyro-Glu)TELFAHFIQPAAQK(1311.6863)TPTSPLK	114	snf2h	snf2h_auton	56.4	IAFTEWIE(2417.2743)PPK	734	snf2h	snf2h4	27.1	unique	30.7	2.9	adpbefx	1.5
623.169	6	0.6	Z20170518-31a_filtered	53.475	1	APRPPK(1467.7874)QPNVQDFQFFPPR	769	snf2h	snf2h_hand	31.4	IAFTE(2247.1701)WIEPPKR	731	snf2h	snf2h4	29.3	unique	33.2	2.9	adpbefx	13
1103.55	4	0.2	Z20170518-31a_filtered	64.541	1	GGPE(1136.6991)GVAAQAVASAASAGPADAEMEEIFDDASPGK+Incorrect Mono 1Da	40	snf2h	snf2h1	58.4	MVVLDK(3254.4674)LLPK+Incorrect Mono 1Da	492	snf2h	snf2h_reca2	4.5	unique	27.3	2.8	adpbefx	3
1052.01	4	-0.4	Z20170518-31a_filtered	53.566	1	GGPEGVAAQAVASAASAGPAD(914.5338)AEM(Oxidation)EEIFDDASPGK+Incorrect Mono 1Da	57	snf2h	snf2h1	39.5	TIGYK(3270.4623)VPR+Incorrect Mono 1Da	801	snf2h	snf2h_hand	1.4	positional variants	36.2	2.8	adpbefx	1.3
929.154	3	0.9	Z20170518-33b_filtered	51.26	1	IAFTE(1298.6408)WIEPPKR	731	snf2h	snf2h4	47	K(1467.7874)ANYAVDAYFR	741	snf2h	snf2h_hand	27.9	unique	32.7	2.8	adpbefx	11.5
640.073	4	-1.4	Z20170518-33b_filtered	43.117	1	E(822.4647)SEITDEDIDGILER+Incorrect Mono 1Da	668	snf2h	snf2h_negc	36.1	MK(1714.7897)PGRPR+Incorrect Mono 1Da	123	snf2h	snf2h_auton	1.4	positional variants	30.7	2.8	adpbefx	1.3
955.513	4	0.4	Z20170518-31a_filtered	57.161	1	VTIAQGGVLPNIQSVLLPK(1743.7687)K	118	h2a	h2a_ctail	66.5	IDEAESLNDE(2056.2408)ELEEK	831	snf2h	snf2h_hand	18.4	positional variants	21.9	2.8	adpbefx	1.1
955.513	4	0.4	Z20170518-31a_filtered	57.161	1	VTIAQGGVLPNIQSVLLPK(1743.7687)K	118	h2a	h2a_ctail	66.5	IDEAESLNDEE(2056.2408)LEEK	832	snf2h	snf2h_hand	18.4	positional variants	21.9	2.8	adpbefx	1.1
600.736	5	0.6	Z20170518-33b_filtered	55.978	1	ILMK(1467.7874)DIDILNSAGK+Incorrect Mono 1Da	432	snf2h	snf2h_reca2	26.3	IAFTE(1511.8381)WIEPPKR+Incorrect Mono 1Da	731	snf2h	snf2h4	24.6	unique	40.1	2.8	adpbefx	2.5
695.101	4	0.3	Z20170518-33b_filtered	39.346	1	RTEQEEDEE(854.4974)LLTESSK	155	snf2h	snf2h_auton	39.6	ALDTK(1903.8647)IGR	926	snf2h	snf2h_slide	23.8	unique	30.2	2.8	adpbefx	1.3
905.65	4	0.2	Z20170518-33b_filtered	51.598	1	NFTM(Oxidation)DTE(1298.6408)SSVYNFEGEDYR+Incorrect Mono 1Da	710	snf2h	snf2h4	43	K(2300.9168)ANYAVDAYFR+Incorrect Mono 1Da	741	snf2h	snf2h_hand	26.9	positional variants	34.9	2.8	adpbefx	2
821.218	5	0.2	Z20170518-31a_filtered	59.473	1	APRPPK(1835.8730)QPNVQDFQFFPPR	769	snf2h	snf2h_hand	46.8	TPE(2247.1701)EVIEYSAVFWER	880	snf2h	snf2h_sant	28.9	positional variants	32.2	2.8	adpbefx	2
1028.23	4	0.4	Z20170518-31a_filtered	58.325	1	NFTMDTESSVYNFE(1804.9658)GEDYR+Incorrect Mono 1Da	717	snf2h	snf2h4	12.4	TLQTISLLGYMK(2284.9219)HYR+Incorrect Mono 1Da	225	snf2h	snf2h_reca1	9.2	unique	37.7	2.8	adpbefx	3
865.188	4	-0.9	Z20170518-31a_filtered	63.9	1	IDE(1693.9443)AESLNDEELEEK+Incorrect Mono 1Da	824	snf2h	snf2h_hand	33.2	LFELLEK(1743.7687)EILFYR+Incorrect Mono 1Da	789	snf2h	snf2h_hand	22.1	positional variants	36.2	2.8	adpbefx	1.3
1021.24	4	0.9	Z20170518-33b_filtered	42.815	1	735.3340-GSMSSAAEPPPPPPPESAPSKPAASIASGGSNSSNK	1	snf2h	snf2h1	60.1	E(3327.5677)WYTR	424	snf2h	snf2h_reca2	3.9	unique	26	2.8	adpbefx	4
869.036	5	-2	Z20170518-31a_filtered	54.205	1	Q(Gln->pyro-Glu)TELFAHFIQPAAQK(1903.8647)TPTSPLK+Incorrect Mono 1Da	114	snf2h	snf2h_auton	23.6	RTE(2417.2743)QEEDEELLTESSK+Incorrect Mono 1Da	149	snf2h	snf2h_auton	8.9	positional variants	36.6	2.8	adpbefx	2.1
732.778	5	1.5	Z20170518-33b_filtered	61.591	1	TPEEVIE(1804.9658)YSAVFWER	884	snf2h	snf2h_sant	30.8	TLQTISLLGYMK(1835.8730)HYR	225	snf2h	snf2h_reca1	29.9	unique	34.2	2.8	adpbefx	3.3
843.909	4	-1.6	Z20170518-33b_filtered	59.226	1	TPEEVIE(1516.7245)YSAVFWER+Incorrect Mono 1Da	884	snf2h	snf2h_sant	31.5	STLHNWMSEFK(1835.8730)R+Incorrect Mono 1Da	251	snf2h	snf2h_reca1	4.9	unique	32.9	2.8	adpbefx	2
602.02	3	0.7	Z20170518-33a_filtered	23.887	1	APK(841.4480)APRPPK+Incorrect Mono 1Da	763	snf2h	snf2h_hand	9.5	IMAQIE(942.5763)R+Incorrect Mono 1Da	907	snf2h	snf2h_slide	1.8	unique	39.1	2.8	adpbefx	5
618.327	4	0.2	Z20170518-33b_filtered	57.559	1	LGFDK(872.5008)ENVYDELR	968	snf2h	snf2h_slide	33.6	LFELLE(1578.7678)K	788	snf2h	snf2h_hand	30.1	unique	33.3	2.8	adpbefx	2.5
647.812	4	0.7	Z20170518-33b_filtered	45.665	1	STLHNWMSEFK(1052.4815)R	251	snf2h	snf2h_reca1	33.2	FE(1516.7245)DSPSYVK	171	snf2h	snf2h2	24.6	positional variants	32.5	2.8	adpbefx	1.5
713.033	3	-1.4	Z20170518-33a_filtered	41.119	1	EK(557.2558)LLTQGFTNWNK+Incorrect Mono 1Da	838	snf2h	snf2h_hand	39.2	E(1559.8096)QGSR+Incorrect Mono 1Da	499	snf2h	snf2h_reca2	2.4	unique	28.8	2.8	adpbefx	2
1028.99	4	-0.9	Z20170518-33b_filtered	65.788	1	EVEGK(1714.7897)TPEEVIEYSAVFWER+Incorrect Mono 1Da	877	snf2h	snf2h_sant	37	E(2378.1430)SEITDEDIDGILER+Incorrect Mono 1Da	668	snf2h	snf2h_negc	26.3	positional variants	33.7	2.8	adpbefx	2.5
721.362	3	0.8	Z20170518-33a_filtered	37.233	1	YK(1002.4328)APFHQLR	931	snf2h	snf2h_slide	33.5	E(1140.6192)NMELEEK	1013	snf2h	snf2h_slide	26.6	unique	34.5	2.8	adpbefx	6.5
715.972	5	0	Z20170518-33b_filtered	58.674	1	FEYLLK(1052.4815)QTELFAHFIQPAAQK+Incorrect Mono 1Da	99	snf2h	snf2h_auton	58.6	FE(2503.3264)DSPSYVK+Incorrect Mono 1Da	171	snf2h	snf2h2	13.8	unique	32	2.8	adpbefx	4
1049.25	4	-0.3	Z20170518-31a_filtered	40.37	1	831.4127-GSM(Oxidation)SSAAEPPPPPPPESAPSKPAASIASGGSNSSNK	1	snf2h	snf2h1	72.8	EIAQD(3343.5627)FK	77	h3	h3	2.1	unique	23.7	2.8	adpbefx	10.5
726.859	4	1.9	Z20170518-33b_filtered	42.237	1	ID(1140.6192)EAESLNDEELEEK+Incorrect Mono 1Da	823	snf2h	snf2h_hand	37.2	YK(1743.7687)APFHQLR+Incorrect Mono 1Da	931	snf2h	snf2h_slide	10.7	positional variants	33.8	2.8	adpbefx	1.8
600.124	5	-0.1	Z20170518-33b_filtered	46.476	1	QTELFAHFIQPAAQK(542.2700)TPTSPLK+Incorrect Mono 1Da	114	snf2h	snf2h_auton	36	E(2434.3009)VEGK+Incorrect Mono 1Da	873	snf2h	snf2h_sant	-0.1	unique	33.5	2.8	adpbefx	7
797.202	5	0.2	Z20170518-31a_filtered	56.572	1	APRPPK(1714.7897)QPNVQDFQFFPPR+Incorrect Mono 1Da	769	snf2h	snf2h_hand	31.6	ESEITDEDID(2247.1701)GILER+Incorrect Mono 1Da	677	snf2h	snf2h_negc	19.3	positional variants	35.2	2.8	adpbefx	1.3
798.901	4	0.2	Z20170518-33b_filtered	55.337	1	ESEITD(1458.7732)EDIDGILER	673	snf2h	snf2h_negc	47.4	LLTQGFTNWNK(1714.7897)R	849	snf2h	snf2h_sant	29.4	unique	28.4	2.8	adpbefx	1.7
768.637	4	0.5	Z20170518-33b_filtered	59.727	1	VLDILED(1458.7732)YC(Carbamidomethyl)MWR	519	snf2h	snf2h_reca2	30	LLTQGFTNWNK(1593.7320)R	849	snf2h	snf2h_sant	29.9	unique	29.6	2.8	adpbefx	1.5
654.358	6	1.1	Z20170518-31a_filtered	54.427	1	QTELFAHFIQPAAQK(1467.7874)TPTSPLK	114	snf2h	snf2h_auton	51.2	IAFTE(2434.3009)WIEPPKR	731	snf2h	snf2h4	22	unique	29	2.8	adpbefx	12.5
861.189	4	2.6	Z20170518-33b_filtered	61.092	1	E(1706.9144)SEITDEDIDGILER+Incorrect Mono 1Da	668	snf2h	snf2h_negc	31.6	Q(Gln->pyro-Glu)K(1714.7897)IAFTEWIEPPKR+Incorrect Mono 1Da	726	snf2h	snf2h4	24.1	positional variants	34.1	2.8	adpbefx	2.2
522.276	4	0.1	Z20170518-33b_filtered	40.618	1	D(1140.6192)DIENIAR	865	snf2h	snf2h_sant	33.8	YK(926.4458)APFHQLR	931	snf2h	snf2h_slide	25	unique	27.6	2.8	adpbefx	6.5
689.174	5	0.6	Z20170518-31a_filtered	58.855	1	E(1175.6485)WYTRILMKDIDILNSAGK	424	snf2h	snf2h_reca2	36.7	IYVGLSK(2247.1722)MQR	420	snf2h	snf2h_reca2	28.9	positional variants	33.9	2.8	adpbefx	24
1075.05	4	-1	Z20170518-31a_filtered	45.32	1	934.5852-GSM(Oxidation)SSAAEPPPPPPPESAPSKPAASIASGGSNSSNK	1	snf2h	snf2h1	77	LLLPGE(3343.5627)LAK	102	h2b	h2b_ap	8.3	unique	26.3	2.8	adpbefx	14.3
596.68	3	0	Z20170518-33a_filtered	41.255	1	K(872.5008)SAPATGGVK	27	h3	h3_tail	27.4	LFELLE(896.5080)K	788	snf2h	snf2h_hand	27.1	unique	32.4	2.8	adpbefx	2
702.161	5	0.8	Z20170518-31a_filtered	50.104	1	LLLPGELAK(1743.7687)HAVSEGTK	105	h2b	h2b_ap	33.9	IDEAE(1743.9883)SLNDEELEEK	826	snf2h	snf2h_hand	32.4	positional variants	36.1	2.8	adpbefx	2.2
913.694	4	0.9	Z20170518-33b_filtered	44.443	1	NPELPNAAQAQK(1743.7687)EEQLK	816	snf2h	snf2h_hand	57.1	IDEAE(1888.9643)SLNDEELEEK	826	snf2h	snf2h_hand	36.5	positional variants	23.7	2.7	adpbefx	5
983.709	5	-0.7	Z20170518-33b_filtered	63.453	1	DVLLPGEWDVC(Carbamidomethyl)VTSYEMLIKEK(1827.9533)SVFK+Incorrect Mono 1Da	296	snf2h	snf2h_reca1	14.8	KFNWRYLVID(3066.5446)EAHR+Incorrect Mono 1Da	310	snf2h	snf2h_reca1	9	unique	41.5	2.7	adpbefx	6.8
988.514	5	-3.9	Z20170518-31a_filtered	71.704	1	GLNWLISLYE(2247.1701)NGINGILADEMGLGK+Incorrect Mono 1Da	198	snf2h	snf2h_reca1	45.8	APRPPK(2671.3680)QPNVQDFQFFPPR+Incorrect Mono 1Da	769	snf2h	snf2h_hand	25.9	unique	30.9	2.7	adpbefx	2
871.154	4	2.1	Z20170518-33b_filtered	42.447	1	QK(1747.7636)EIQEPDPTYEEK	73	snf2h	snf2h1	41	TEQE(1714.8050)EDEELLTESSK	151	snf2h	snf2h_auton	29.1	unique	33	2.7	adpbefx	1.7
475.463	5	0.1	Z20170518-33b_filtered	47.012	1	C(Carbamidomethyl)NTLITLIE(1140.6192)R	1011	snf2h	snf2h_slide	34.1	YK(1213.6489)APFHQLR	931	snf2h	snf2h_slide	29.7	unique	35.1	2.7	adpbefx	7
718.602	4	0.5	Z20170518-33b_filtered	36.206	1	RTEQEEDE(948.5029)ELLTESSK	154	snf2h	snf2h_auton	32.6	ISYGTNK(1903.8647)GK	945	snf2h	snf2h_slide	28.9	positional variants	31.8	2.7	adpbefx	1.3
629.328	5	-1	Z20170518-33b_filtered	46.159	1	TPEEVIE(1286.7208)YSAVFWER+Incorrect Mono 1Da	884	snf2h	snf2h_sant	38.5	SAPATGGVK(1835.8730)KPHR+Incorrect Mono 1Da	36	h3	h3_tail	8.7	unique	31.2	2.7	adpbefx	2.2
734.866	4	0.5	Z20170518-33b_filtered	46.354	1	LLTQGFTNWNK(1458.6515)R	849	snf2h	snf2h_sant	29.1	EIQEPD(1458.7732)PTYEEK	79	snf2h	snf2h1	25.4	positional variants	32.9	2.7	adpbefx	1.7
835.231	4	-0.5	Z20170518-33a_filtered	54.23	1	VTIAQGGVLPNIQSVLLPK(1261.6415)K+Incorrect Mono 1Da	118	h2a	h2a_ctail	17.6	NPE(2056.2408)LPNAAQAQK+Incorrect Mono 1Da	807	snf2h	snf2h_hand	2.8	unique	36.2	2.7	adpbefx	5
1012.99	4	0.1	Z20170518-31a_filtered	55.307	1	NFTMDTESSVYNFE(1743.9883)GEDYR+Incorrect Mono 1Da	717	snf2h	snf2h4	14.9	LLLPGELAK(2284.9219)HAVSEGTK+Incorrect Mono 1Da	105	h2b	h2b_ap	7.4	unique	37	2.7	adpbefx	2.3
973.105	3	-0.7	Z20170518-33b_filtered	45.095	1	NFTMDTESSVYNFE(612.3595)GEDYR+Incorrect Mono 1Da	717	snf2h	snf2h4	11.7	IK(2284.9219)NEK+Incorrect Mono 1Da	316	snf2h	snf2h_reca1	-2.3	positional variants	42.2	2.7	adpbefx	2.5
701.391	6	-0.3	Z20170518-31a_filtered	76.011	1	VGAGAPVYLAAVLEYLTAEILE(1286.7208)LAGNAAR+Incorrect Mono 1Da	64	h2a	h2a_ap	38.7	SAPATGGVK(2896.5698)KPHR+Incorrect Mono 1Da	36	h3	h3_tail	3	positional variants	34.2	2.7	adpbefx	1.8
701.391	6	-0.3	Z20170518-31a_filtered	76.011	1	VGAGAPVYLAAVLEYLTAEILE(1286.7208)LAGNAAR+Incorrect Mono 1Da	64	h2a	h2a_ap	38.7	SAPATGGVKK(2896.5698)PHR+Incorrect Mono 1Da	37	h3	h3_tail	3	positional variants	34.2	2.7	adpbefx	3.8
905.66	4	-1.4	Z20170518-31a_filtered	58.24	1	IGK(2284.9219)DEMLQMIR+Incorrect Mono 1Da	649	snf2h	snf2h_negc	16.2	NFTMDTESSVYNFE(1314.6788)GEDYR+Incorrect Mono 1Da	717	snf2h	snf2h4	13.3	unique	38.5	2.7	adpbefx	1.5
539.523	5	0.4	Z20170518-31a_filtered	54.818	1	D(1367.8289)NIQGITKPAIR	24	h4	h4_tail	38.5	GVLK(1306.7357)VFLENVIR	59	h4	h4	35.7	unique	32.6	2.7	adpbefx	7
906.165	4	-0.3	Z20170518-33b_filtered	46.079	1	TEQEEDEELLTESSK(1052.4815)ATNVC(Carbamidomethyl)TR	162	snf2h	snf2h2	99	FE(2550.1392)DSPSYVK	171	snf2h	snf2h2	12	unique	19.2	2.7	adpbefx	7
917.513	4	0.1	Z20170518-31a_filtered	82.943	1	VGAGAPVYLAAVLEYLTAE(750.4388)ILELAGNAAR+Incorrect Mono 1Da	61	h2a	h2a_ap	53.4	2896.5698-AKSAPAPK+Incorrect Mono 1Da	1	h2b	h2b_tail	5.8	positional variants	27.9	2.7	adpbefx	2.3
917.513	4	0.1	Z20170518-31a_filtered	82.943	1	VGAGAPVYLAAVLEYLTAE(750.4388)ILELAGNAAR+Incorrect Mono 1Da	61	h2a	h2a_ap	53.4	AK(2896.5698)SAPAPK+Incorrect Mono 1Da	2	h2b	h2b_tail	5.8	positional variants	27.9	2.7	adpbefx	2.3
639.145	5	-0.1	Z20170518-33b_filtered	46.734	1	APRPPK(924.5029)QPNVQDFQFFPPR+Incorrect Mono 1Da	769	snf2h	snf2h_hand	18.7	LVD(2247.1701)QNLNK+Incorrect Mono 1Da	641	snf2h	snf2h_reca2	8.6	unique	34.5	2.7	adpbefx	3
655.962	5	0	Z20170518-31a_filtered	41.766	1	QTE(1546.8766)LFAHFIQPAAQK	102	snf2h	snf2h_auton	44.7	TPTSPLK(1709.8889)MKPGRPR	121	snf2h	snf2h_auton	20.3	unique	28.8	2.7	adpbefx	8
1008.16	3	-1.5	Z20170518-33b_filtered	48.447	1	LLTQGFTNWNK(1544.6743)R	849	snf2h	snf2h_sant	44.5	Q(Gln->pyro-Glu)DSINAYNE(1458.7732)PNSTK	549	snf2h	snf2h_reca2	21.8	unique	29.8	2.7	adpbefx	2
473.648	5	0.1	Z20170518-33b_filtered	41.457	1	FITDNTVEE(1140.6192)R	617	snf2h	snf2h_reca2	38.1	YK(1204.5724)APFHQLR	931	snf2h	snf2h_slide	30.9	unique	34.8	2.7	adpbefx	2
1028.99	4	-0.9	Z20170518-33b_filtered	65.788	1	EVEGK(1714.7897)TPEEVIEYSAVFWER+Incorrect Mono 1Da	877	snf2h	snf2h_sant	37	ESE(2378.1430)ITDEDIDGILER+Incorrect Mono 1Da	670	snf2h	snf2h_negc	25.9	positional variants	33.3	2.7	adpbefx	1.7
982.446	3	-0.2	Z20170518-33a_filtered	50.51	1	NFTMDTESSVYNFE(640.3809)GEDYR+Incorrect Mono 1Da	717	snf2h	snf2h4	15.8	WGK(2284.9219)LR+Incorrect Mono 1Da	181	snf2h	snf2h2	-4.3	unique	42.9	2.7	adpbefx	3.5
821.42	5	1.3	Z20170518-33b_filtered	58.881	1	APRPPK(1835.8730)QPNVQDFQFFPPR+Incorrect Mono 1Da	769	snf2h	snf2h_hand	29.4	TPEEVIE(2247.1701)YSAVFWER+Incorrect Mono 1Da	884	snf2h	snf2h_sant	25.1	positional variants	34.7	2.7	adpbefx	6.8
612.037	3	0.3	Z20170518-33a_filtered	39.214	1	APK(872.5008)APRPPK	763	snf2h	snf2h_hand	31.3	LFELLE(942.5763)K	788	snf2h	snf2h_hand	27.9	unique	26.9	2.7	adpbefx	4
771.39	3	-0.3	Z20170518-33a_filtered	38.858	1	FITD(1088.5648)NTVEER	612	snf2h	snf2h_reca2	40.4	LSK(1204.5724)MGESSLR	696	snf2h	snf2h_negc	28.9	unique	32.1	2.7	adpbefx	4
654.329	4	0.2	Z20170518-33b_filtered	37.244	1	RTEQEEDE(690.4065)ELLTESSK+Incorrect Mono 1Da	154	snf2h	snf2h_auton	26.5	K(1903.8647)TIGYK+Incorrect Mono 1Da	796	snf2h	snf2h_hand	8.9	unique	33.1	2.7	adpbefx	2.5
801.77	3	-1	Z20170518-33a_filtered	43.114	1	LVD(1458.7732)QNLNK+Incorrect Mono 1Da	641	snf2h	snf2h_reca2	6.1	LLTQGFTNWNK(924.5029)R+Incorrect Mono 1Da	849	snf2h	snf2h_sant	4	unique	41.2	2.7	adpbefx	4
640.073	4	-1.4	Z20170518-33b_filtered	43.117	1	ESE(822.4647)ITDEDIDGILER+Incorrect Mono 1Da	670	snf2h	snf2h_negc	37	MK(1714.7897)PGRPR+Incorrect Mono 1Da	123	snf2h	snf2h_auton	1.4	positional variants	30	2.7	adpbefx	2.3
556.644	3	-0.4	Z20170518-33a_filtered	23.114	1	QLATK(809.4032)AAR	23	h3	h3_tail	32.5	HAVSE(839.4977)GTK	110	h2b	h2b_ap	29.8	unique	32.2	2.7	adpbefx	6
654.731	5	0.1	Z20170518-33b_filtered	47.954	1	APRPPK(1002.4328)QPNVQDFQFFPPR+Incorrect Mono 1Da	769	snf2h	snf2h_hand	28.9	E(2247.1701)NMELEEK+Incorrect Mono 1Da	1013	snf2h	snf2h_slide	6.7	unique	32.2	2.7	adpbefx	3
759.162	5	-0.3	Z20170518-33b_filtered	42.615	1	C(Carbamidomethyl)C(Carbamidomethyl)NHPYLFD(496.3486)GAEPGPPYTTDM(Oxidation)HLVTNSGK+Incorrect Mono 1Da	466	snf2h	snf2h_reca2	81.3	K(3275.4111)VLR+Incorrect Mono 1Da	20	h4	h4_tail	0.8	unique	27	2.7	adpbefx	10
702.161	5	0.8	Z20170518-31a_filtered	50.104	1	LLLPGELAK(1743.7687)HAVSEGTK	105	h2b	h2b_ap	33.9	IDE(1743.9883)AESLNDEELEEK	824	snf2h	snf2h_hand	32.3	positional variants	35.7	2.7	adpbefx	2.2
841.414	3	-0.9	Z20170518-33a_filtered	46.711	1	FITDNTVEE(1298.6408)R	617	snf2h	snf2h_reca2	42.1	K(1204.5724)ANYAVDAYFR	741	snf2h	snf2h_hand	29	unique	27.5	2.7	adpbefx	2
756.918	4	0.6	Z20170518-33b_filtered	45.2	1	LLLPGELAK(1261.6415)HAVSEGTK	105	h2b	h2b_ap	31.8	NPE(1743.9883)LPNAAQAQK	807	snf2h	snf2h_hand	31.1	unique	35.3	2.7	adpbefx	7
858.01	5	0	Z20170518-31a_filtered	52.726	1	NFTMDTESSVYNFEGEDYREK(1467.7874)QK+Incorrect Mono 1Da	724	snf2h	snf2h4	23.4	IAFTE(2798.2130)WIEPPKR+Incorrect Mono 1Da	731	snf2h	snf2h4	5.5	positional variants	35.9	2.6	adpbefx	6.4
955.513	4	0.4	Z20170518-31a_filtered	57.161	1	VTIAQGGVLPNIQSVLLPK(1743.7687)K	118	h2a	h2a_ctail	66.5	IDEAESLND(2056.2408)EELEEK	830	snf2h	snf2h_hand	16.5	positional variants	20.3	2.6	adpbefx	1.1
762.877	4	0.1	Z20170518-33b_filtered	57.943	1	E(1314.6788)SEITDEDIDGILER	668	snf2h	snf2h_negc	70	IGK(1714.7897)DEMLQMIR	649	snf2h	snf2h_negc	16.4	unique	20.2	2.6	adpbefx	3.9
710.872	4	-1	Z20170518-33a_filtered	45.64	1	EK(1261.6415)LLTQGFTNWNK	838	snf2h	snf2h_hand	54.1	NPE(1559.8096)LPNAAQAQK	807	snf2h	snf2h_hand	21.9	unique	26.9	2.6	adpbefx	2.5
743.726	3	0.5	Z20170518-33a_filtered	33.296	1	NPE(948.5029)LPNAAQAQK	807	snf2h	snf2h_hand	36	ISYGTNK(1261.6415)GK	945	snf2h	snf2h_slide	28.9	unique	32.8	2.6	adpbefx	3
1341.61	4	1.2	Z20170518-31a_filtered	59.589	1	GGPEGVAAQAVASAASAGPADAE(2089.9262)MEEIFDDASPGK	59	snf2h	snf2h1	67	EIQEPDPTYEEK(3254.4674)MQTDR	85	snf2h	snf2h_auton	19.2	positional variants	23.2	2.6	adpbefx	4
647.165	5	-0.2	Z20170518-31a_filtered	52.127	1	IAFTE(1743.9883)WIEPPKR+Incorrect Mono 1Da	731	snf2h	snf2h4	20.2	LLLPGELAK(1467.7874)HAVSEGTK+Incorrect Mono 1Da	105	h2b	h2b_ap	16.8	unique	36.4	2.6	adpbefx	11.5
855.412	5	-0.3	Z20170518-31a_filtered	43.657	1	926.4458-GSMSSAAEPPPPPPPESAPSKPAASIASGGSNSSNK	1	snf2h	snf2h1	86.2	DDIE(3327.5677)NIAR	868	snf2h	snf2h_sant	3.9	positional variants	22.6	2.6	adpbefx	1.7
944.702	4	0.7	Z20170518-33b_filtered	36.253	1	413.2023-GSM(Oxidation)SSAAEPPPPPPPESAPSKPAASIASGGSNSSNK	1	snf2h	snf2h1	70	GE(3343.5627)AR	910	snf2h	snf2h_slide	-2.3	protein variants	25.7	2.6	adpbefx	12
1103	5	0.9	Z20170518-31a_filtered	73.62	1	FQSSAVM(Oxidation)ALQEASE(2056.2408)AYLVALFEDTNLAAIHAK	97	h3	h3	34.6	VTIAQGGVLPNIQSVLLPK(3435.7021)K	118	h2a	h2a_ctail	22.6	positional variants	27.6	2.6	adpbefx	6.8
552.556	4	0	Z20170518-33a_filtered	58.292	1	IGK(872.5008)DEMLQMIR+Incorrect Mono 1Da	649	snf2h	snf2h_negc	23.2	LFELLE(1314.6788)K+Incorrect Mono 1Da	788	snf2h	snf2h_hand	2.9	unique	36.9	2.6	adpbefx	3
1354.27	5	1.1	Z20170518-31a_filtered	68.165	1	FQSSAVMALQEASE(3327.5677)AYLVALFEDTNLAAIHAK+Incorrect Mono 1Da	97	h3	h3	53.6	3419.7071-GSMSSAAEPPPPPPPESAPSKPAASIASGGSNSSNK+Incorrect Mono 1Da	1	snf2h	snf2h1	44.8	positional variants	29.4	2.6	adpbefx	1.5
480.675	5	0.5	Z20170518-33b_filtered	49.987	1	IAFTE(912.5393)WIEPPKR	731	snf2h	snf2h4	34	SK(1467.7874)LSEIVR	321	snf2h	snf2h_reca1	26.8	unique	31.2	2.6	adpbefx	2
942.684	6	0.9	Z20170518-31a_filtered	77.32	1	VGAGAPVYLAAVLEYLTAE(2734.4694)ILELAGNAAR+Incorrect Mono 1Da	61	h2a	h2a_ap	37.6	KESYAIYVYKVLK(2896.5698)QVHPDTGISSK+Incorrect Mono 1Da	43	h2b	h2b	4.1	positional variants	36.4	2.6	adpbefx	17.8
880.782	3	0.6	Z20170518-33b_filtered	60.342	1	FLIC(Carbamidomethyl)MLHK(1018.4720)LGFDK	963	snf2h	snf2h_slide	50	ENVYDE(1602.8415)LR	974	snf2h	snf2h_slide	27.1	unique	28.6	2.6	adpbefx	6.5
904.405	3	-1	Z20170518-33a_filtered	43.808	1	TEQEEDEE(943.4182)LLTESSK+Incorrect Mono 1Da	155	snf2h	snf2h_auton	12.3	K(1747.7636)M(Oxidation)DGAPDGR+Incorrect Mono 1Da	1038	snf2h	snf2h5	0.1	positional variants	33.6	2.6	adpbefx	2.6
685.855	4	0.2	Z20170518-33a_filtered	41.168	1	NPELPNAAQAQK(831.4127)EEQLK+Incorrect Mono 1Da	816	snf2h	snf2h_hand	27.9	EIAQD(1888.9643)FK+Incorrect Mono 1Da	77	h3	h3	2.7	unique	33.5	2.6	adpbefx	3.5
575.515	5	-0.6	Z20170518-33b_filtered	38.973	1	VFRFITD(1247.7211)NTVEER	612	snf2h	snf2h_reca2	56.2	AHRIGQTK(1606.8104)TVR	602	snf2h	snf2h_reca2	29.3	unique	26	2.6	adpbefx	24
978.747	4	-1.1	Z20170518-31a_filtered	49.968	1	QTELFAHFIQPAAQK(1458.6515)TPTSPLK	114	snf2h	snf2h_auton	43.4	EIQEPD(2434.3009)PTYEEK	79	snf2h	snf2h1	25.2	positional variants	25.1	2.6	adpbefx	1.5
932.909	4	-1.5	Z20170518-33a_filtered	52.962	1	NFTMDTESSVYNFE(1423.6772)GEDYR+Incorrect Mono 1Da	717	snf2h	snf2h4	14.5	FEDSPSYVK(2284.9219)WGK+Incorrect Mono 1Da	178	snf2h	snf2h2	12.2	unique	35.3	2.6	adpbefx	2
989.068	5	-2.1	Z20170518-31a_filtered	54.359	1	1593.7320-GSMSSAAEPPPPPPPESAPSKPAASIASGGSNSSNK+Incorrect Mono 1Da	1	snf2h	snf2h1	75.7	VLD(3327.5677)ILEDYC(Carbamidomethyl)MWR+Incorrect Mono 1Da	515	snf2h	snf2h_reca2	19.4	unique	27.3	2.6	adpbefx	5.8
1175.3	4	-0.7	Z20170518-31a_filtered	60.269	1	GGPEGVAAQAVASAASAGPADAE(1423.6772)MEEIFDDASPGK+Incorrect Mono 1Da	59	snf2h	snf2h1	73.4	FEDSPSYVK(3254.4674)WGK+Incorrect Mono 1Da	178	snf2h	snf2h2	6.8	unique	23.4	2.6	adpbefx	4.8
1103	5	0.9	Z20170518-31a_filtered	73.62	1	FQSSAVM(Oxidation)ALQEASEAYLVALFE(2056.2408)DTNLAAIHAK	105	h3	h3	34.1	VTIAQGGVLPNIQSVLLPK(3435.7021)K	118	h2a	h2a_ctail	22.6	positional variants	27.2	2.6	adpbefx	5.3
983.475	4	0.6	Z20170518-33b_filtered	56.879	1	GGPEGVAAQAVASAASAGPADAE(656.3857)MEEIFDDASPGK+Incorrect Mono 1Da	59	snf2h	snf2h1	58.8	K(3254.4674)ALDTK+Incorrect Mono 1Da	921	snf2h	snf2h_slide	-0.7	positional variants	33.6	2.6	adpbefx	2.7
903.026	5	-0.3	Z20170518-31a_filtered	36.538	1	1148.5210-GSM(Oxidation)SSAAEPPPPPPPESAPSKPAASIASGGSNSSNK	1	snf2h	snf2h1	69.8	LD(3343.5627)GQTPHDER	532	snf2h	snf2h_reca2	4.5	unique	18.4	2.6	adpbefx	4.7
747.807	5	0.3	Z20170518-33b_filtered	82.995	1	VGAGAPVYLAAVLEYLTAE(818.4134)ILELAGNAAR+Incorrect Mono 1Da	61	h2a	h2a_ap	42.4	TESSK(2896.5698)SAK+Incorrect Mono 1Da	124	h2a	h2a_ctail	0.4	unique	36.3	2.6	adpbefx	3
689.174	5	0.6	Z20170518-31a_filtered	58.855	1	ILMK(1910.9825)DIDILNSAGK	432	snf2h	snf2h_reca2	38	IYVGLSKMQRE(1511.8381)WYTR	424	snf2h	snf2h_reca2	32	positional variants	32.1	2.6	adpbefx	14
938.088	5	-0.5	Z20170518-32b_filtered	70.234	1	FQSSAVM(Oxidation)ALQE(1231.6925)ASEAYLVALFEDTNLAAIHAK	94	h3	h3	82.2	YQK(3435.7021)STELLIR	56	h3	h3	17.9	unique	26.4	2.6	adpbefx	7.5
587.676	3	-0.5	Z20170518-33a_filtered	41.153	1	C(Carbamidomethyl)NTLITLIE(527.3431)R+Incorrect Mono 1Da	1011	snf2h	snf2h_slide	5	K(1213.6489)AVTK+Incorrect Mono 1Da	13	h2b	h2b_tail	2.1	unique	36.5	2.6	adpbefx	3
704.101	4	0.4	Z20170518-33b_filtered	38.345	1	LDGQTPHDE(1645.8424)R	539	snf2h	snf2h_reca2	37.9	K(1148.5210)DEKQNLLSVGDYR	131	snf2h	snf2h_auton	23.7	positional variants	28.5	2.6	adpbefx	3
704.101	4	0.4	Z20170518-33b_filtered	38.345	1	LDGQTPHDE(1645.8424)R	539	snf2h	snf2h_reca2	37.9	KDEK(1148.5210)QNLLSVGDYR	134	snf2h	snf2h_auton	23.1	positional variants	28.5	2.6	adpbefx	2
899.775	3	-1	Z20170518-33a_filtered	54.421	1	TPEEVIE(841.4195)YSAVFWER+Incorrect Mono 1Da	884	snf2h	snf2h_sant	28.4	ANEK(1835.8730)WGR+Incorrect Mono 1Da	861	snf2h	snf2h_sant	0.8	unique	32.8	2.6	adpbefx	2
572.664	3	-0.1	Z20170518-33a_filtered	39.339	1	GPK(872.5008)PSTQK+Incorrect Mono 1Da	1031	snf2h	snf2h5	14.5	LFELLE(823.4552)K+Incorrect Mono 1Da	788	snf2h	snf2h_hand	2.2	unique	35.4	2.6	adpbefx	4
562.797	4	0.9	Z20170518-35_filtered	48.939	1	IAFTEWIEPPK(760.3538)R+Incorrect Mono 1Da	737	snf2h	snf2h_hand	13.8	MGE(1467.7874)SSLR+Incorrect Mono 1Da	699	snf2h	snf2h_negc	-1.7	unique	34.5	2.6	adpbefx	5
644.692	3	-1	Z20170518-33a_filtered	36.489	1	1161.6030-AKSAPAPK+Incorrect Mono 1Da	1	h2b	h2b_tail	8	ISGLIYE(750.4388)ETR+Incorrect Mono 1Da	52	h4	h4	2.9	positional variants	37.3	2.6	adpbefx	1.3
714.549	5	-2.8	Z20170518-31a_filtered	43.971	1	KDEK(1903.8647)QNLLSVGDYR	134	snf2h	snf2h_auton	29.4	RTEQEEDE(1645.8424)ELLTESSK	154	snf2h	snf2h_auton	25	positional variants	33.1	2.5	adpbefx	1.6
1070.78	5	-0.4	Z20170518-31a_filtered	82.303	1	VGAGAPVYLAAVLEYLTAE(2434.3009)ILELAGNAAR	61	h2a	h2a_ap	92.8	QTELFAHFIQPAAQK(2896.5698)TPTSPLK	114	snf2h	snf2h_auton	15.7	unique	20	2.5	adpbefx	2
765.022	5	0.1	Z20170518-33b_filtered	69.599	1	GVLK(1317.7041)VFLENVIRDAVTYTEHAK+Incorrect Mono 1Da	59	h4	h4	48.1	RISGLIYEE(2483.3536)TR+Incorrect Mono 1Da	53	h4	h4	2	unique	30.1	2.5	adpbefx	79.3
757.394	4	-1.3	Z20170518-33b_filtered	60.244	1	Q(Gln->pyro-Glu)TE(1314.6788)LFAHFIQPAAQK	102	snf2h	snf2h_auton	34.9	IGK(1692.8624)DEMLQMIR	649	snf2h	snf2h_negc	30.2	unique	32.8	2.5	adpbefx	2
853.42	3	0.4	Z20170518-33b_filtered	43.423	1	Q(Gln->pyro-Glu)K(841.4480)EIQEPDPTYEEK	73	snf2h	snf2h1	47.5	IMAQIE(1697.7784)R	907	snf2h	snf2h_slide	18.9	unique	26.8	2.5	adpbefx	4
612.034	4	-0.2	Z20170518-33a_filtered	36.838	1	FITDNTVE(1221.5262)ER	616	snf2h	snf2h_reca2	30.3	GK(1204.5724)NYTEEEDR	947	snf2h	snf2h_slide	27.7	unique	31.4	2.5	adpbefx	1.5
1041.24	4	3.9	Z20170518-31a_filtered	39.217	1	799.3283-GSM(Oxidation)SSAAEPPPPPPPESAPSKPAASIASGGSNSSNK	1	snf2h	snf2h1	57.5	MD(3343.5627)GAPDGR	1040	snf2h	snf2h5	5	unique	25.4	2.5	adpbefx	9.8
670.159	5	-0.4	Z20170518-33b_filtered	52.67	1	QTELFAHFIQPAAQK(892.4443)TPTSPLK+Incorrect Mono 1Da	114	snf2h	snf2h_auton	33.4	D(2434.3009)FNQFIK+Incorrect Mono 1Da	851	snf2h	snf2h_sant	8	unique	29.2	2.5	adpbefx	2
731.06	3	1.6	Z20170518-33a_filtered	51.543	1	K(872.5008)ANYAVDAYFR+Incorrect Mono 1Da	741	snf2h	snf2h_hand	19.4	LFE(1298.6408)LLEK+Incorrect Mono 1Da	785	snf2h	snf2h_hand	11.4	unique	32.9	2.5	adpbefx	4.5
670.092	4	1.7	Z20170518-33b_filtered	54.172	1	LGFDKENVYD(1079.5553)ELR	973	snf2h	snf2h_slide	31.7	FDWFLK(1578.7678)SR	992	snf2h	snf2h_slide	30.3	positional variants	34.5	2.5	adpbefx	2.5
670.092	4	1.7	Z20170518-33b_filtered	54.172	1	LGFDKENVYDE(1079.5553)LR	974	snf2h	snf2h_slide	31.7	FDWFLK(1578.7678)SR	992	snf2h	snf2h_slide	30.3	positional variants	34.5	2.5	adpbefx	2.5
763.131	4	-1.9	Z20170518-33b_filtered	34.868	1	IDEAE(1286.7208)SLNDEELEEK	826	snf2h	snf2h_hand	44.1	SAPATGGVK(1743.7687)KPHR	36	h3	h3_tail	21.9	positional variants	30.4	2.5	adpbefx	2.5
763.131	4	-1.9	Z20170518-33b_filtered	34.868	1	IDEAE(1286.7208)SLNDEELEEK	826	snf2h	snf2h_hand	44.1	SAPATGGVKK(1743.7687)PHR	37	h3	h3_tail	21.9	positional variants	30.4	2.5	adpbefx	2.5
861.215	4	-0.1	Z20170518-31a_filtered	58.887	1	ILMKD(1910.9825)IDILNSAGK	433	snf2h	snf2h_reca2	35.1	IYVGLSK(1511.8381)MQREWYTR	420	snf2h	snf2h_reca2	35	positional variants	32.4	2.5	adpbefx	11.8
578.811	4	0.7	Z20170518-33a_filtered	58.304	1	C(Carbamidomethyl)NTLITLIE(1079.5553)R	1011	snf2h	snf2h_slide	25.9	FDWFLK(1213.6489)SR	992	snf2h	snf2h_slide	25	unique	30.3	2.5	adpbefx	4.3
673.596	4	-0.8	Z20170518-33a_filtered	51.248	1	TPEEVIE(836.4756)YSAVFWER	884	snf2h	snf2h_sant	42.7	VSEPK(1835.8730)APK	760	snf2h	snf2h_hand	18.1	unique	26.6	2.5	adpbefx	2.3
913.482	4	1.4	Z20170518-31a_filtered	65.442	1	FEYLLK(1128.5564)QTELFAHFIQPAAQK	99	snf2h	snf2h_auton	54	Q(Gln->pyro-Glu)NLLSVGD(2503.3264)YR	142	snf2h	snf2h_auton	18.7	unique	26.6	2.5	adpbefx	3
650.33	4	-1.2	Z20170518-33a_filtered	51.001	1	EK(1018.4720)LLTQGFTNWNK+Incorrect Mono 1Da	838	snf2h	snf2h_hand	41.4	E(1559.8096)NVYDELR+Incorrect Mono 1Da	969	snf2h	snf2h_slide	8.6	unique	29.7	2.5	adpbefx	3
796.391	3	-0.3	Z20170518-33a_filtered	33.338	1	Q(Gln->pyro-Glu)DSINAYNE(822.4647)PNSTK+Incorrect Mono 1Da	549	snf2h	snf2h_reca2	11.6	MK(1544.6743)PGRPR+Incorrect Mono 1Da	123	snf2h	snf2h_auton	-0.1	unique	36.1	2.5	adpbefx	7.5
785.429	4	1.4	Z20170518-33b_filtered	54.868	1	APRPPK(872.5008)QPNVQDFQFFPPR	769	snf2h	snf2h_hand	69.2	LFELLE(2247.1701)K	788	snf2h	snf2h_hand	12.4	unique	20.4	2.5	adpbefx	17
614.662	3	-0.4	Z20170518-33a_filtered	33.981	1	D(896.5080)DIENIAR	865	snf2h	snf2h_sant	27.9	K(926.4458)SAPATGGVK	27	h3	h3_tail	23.6	unique	30	2.5	adpbefx	3
777.74	3	-0.2	Z20170518-33b_filtered	52.662	1	DEK(793.4374)QNLLSVGDYR+Incorrect Mono 1Da	134	snf2h	snf2h_auton	30.6	FE(1517.7474)YLLK+Incorrect Mono 1Da	95	snf2h	snf2h_auton	5.7	unique	30.1	2.5	adpbefx	6.8
734.367	4	0.8	Z20170518-33b_filtered	64.172	1	TPEEVIEYSAVFWE(1079.5553)R	891	snf2h	snf2h_sant	60.2	FDWFLK(1835.8730)SR	992	snf2h	snf2h_slide	13	unique	17.8	2.5	adpbefx	2
724.702	3	-0.9	Z20170518-33a_filtered	35.106	1	ISYGTNK(1204.5724)GK	945	snf2h	snf2h_slide	40.2	FITD(948.5029)NTVEER	612	snf2h	snf2h_reca2	22.1	unique	29.3	2.5	adpbefx	3
543.771	4	-1.2	Z20170518-33a_filtered	50.19	1	VLDILED(558.3126)YC(Carbamidomethyl)MWR+Incorrect Mono 1Da	519	snf2h	snf2h_reca2	25.1	K(1593.7320)STGGK+Incorrect Mono 1Da	9	h3	h3_tail	0.8	unique	35.7	2.5	adpbefx	6.5
1424.69	4	-0.8	Z20170518-31a_filtered	60.536	1	2348.1432-GSMSSAAEPPPPPPPESAPSKPAASIASGGSNSSNK+Incorrect Mono 1Da	1	snf2h	snf2h1	30.2	DVLLPGEWD(3327.5677)VC(Carbamidomethyl)VTSYEMLIK+Incorrect Mono 1Da	283	snf2h	snf2h_reca1	23	unique	31.9	2.5	adpbefx	2
905.765	3	-0.9	Z20170518-33a_filtered	37.901	1	TEQEE(948.5029)DEELLTESSK	152	snf2h	snf2h_auton	38.9	ISYGTNK(1747.7636)GK	945	snf2h	snf2h_slide	25.9	unique	30.3	2.5	adpbefx	3.4
781.087	3	-1.3	Z20170518-33a_filtered	46.499	1	EVK(1204.5724)IYVGLSK+Incorrect Mono 1Da	413	snf2h	snf2h_reca2	6	FITDNTVEE(1116.6543)R+Incorrect Mono 1Da	617	snf2h	snf2h_reca2	1.8	unique	38.7	2.5	adpbefx	1.5
760.619	5	-1.7	Z20170518-31a_filtered	79.285	1	VGAGAPVYLAAVLEYLTAE(882.4824)ILELAGNAAR+Incorrect Mono 1Da	61	h2a	h2a_ap	63.1	LAHYNK(2896.5698)R+Incorrect Mono 1Da	82	h2b	h2b	-2.2	unique	43.9	2.5	adpbefx	7.5
957.511	3	4.1	Z20170518-33b_filtered	60.217	1	MVVLDK(1714.7897)LLPK	492	snf2h	snf2h_reca2	25.6	ESEITDE(1136.6991)DIDGILER	674	snf2h	snf2h_negc	25	unique	33.5	2.5	adpbefx	1.8
644.692	3	-1	Z20170518-33a_filtered	36.489	1	AK(1161.6030)SAPAPK+Incorrect Mono 1Da	2	h2b	h2b_tail	9.2	ISGLIYE(750.4388)ETR+Incorrect Mono 1Da	52	h4	h4	2.9	positional variants	37	2.5	adpbefx	1.3
690.595	4	-0.1	Z20170518-33b_filtered	34.281	1	RTEQEED(836.4756)EELLTESSK	153	snf2h	snf2h_auton	37.5	VSEPK(1903.8647)APK	760	snf2h	snf2h_hand	22.9	unique	25.3	2.5	adpbefx	2.4
633.832	4	-1.9	Z20170518-33a_filtered	52.968	1	K(1213.6489)ANYAVDAYFR+Incorrect Mono 1Da	741	snf2h	snf2h_hand	26.2	C(Carbamidomethyl)NTLITLIE(1298.6408)R+Incorrect Mono 1Da	1011	snf2h	snf2h_slide	10.9	unique	27.1	2.5	adpbefx	3
661.031	3	-4.1	Z20170518-33a_filtered	47.123	1	LSK(872.5008)MGESSLR+Incorrect Mono 1Da	696	snf2h	snf2h_negc	19.6	LFELLE(1088.5648)K+Incorrect Mono 1Da	788	snf2h	snf2h_hand	2.5	unique	34.9	2.5	adpbefx	5
713.593	4	-0.8	Z20170518-33a_filtered	42.193	1	IDEAE(1088.5648)SLNDEELEEK	826	snf2h	snf2h_hand	70.2	LSK(1743.7687)MGESSLR	696	snf2h	snf2h_negc	21.1	unique	24.5	2.5	adpbefx	2
804.744	3	-0.6	Z20170518-33a_filtered	35.206	1	NPE(1131.5594)LPNAAQAQK	807	snf2h	snf2h_hand	43.3	TAEMNEK(1261.6415)LSK	693	snf2h	snf2h_negc	26.5	unique	30.3	2.5	adpbefx	4.5
880.803	3	-1.3	Z20170518-33a_filtered	49.451	1	LLTQGFTNWNK(1161.6030)R+Incorrect Mono 1Da	849	snf2h	snf2h_sant	7.5	ISGLIYEE(1458.7732)TR+Incorrect Mono 1Da	53	h4	h4	0.6	positional variants	38	2.5	adpbefx	1.5
880.803	3	-1.3	Z20170518-33a_filtered	49.451	1	LLTQGFTNWNK(1161.6030)R+Incorrect Mono 1Da	849	snf2h	snf2h_sant	7.5	ISGLIYE(1458.7732)ETR+Incorrect Mono 1Da	52	h4	h4	0.6	positional variants	38	2.5	adpbefx	2.5
547.991	3	0.1	Z20170518-33a_filtered	38.512	1	AK(872.5008)SAPAPK	2	h2b	h2b_tail	29.9	LFE(750.4388)LLEK	785	snf2h	snf2h_hand	27.1	unique	30.9	2.5	adpbefx	1.5
904.405	3	-1	Z20170518-33a_filtered	43.808	1	TEQEEDEELLTE(943.4182)SSK+Incorrect Mono 1Da	159	snf2h	snf2h_auton	10.4	K(1747.7636)M(Oxidation)DGAPDGR+Incorrect Mono 1Da	1038	snf2h	snf2h5	0.1	positional variants	31.7	2.5	adpbefx	4.3
646.333	3	-1.1	Z20170518-33a_filtered	37.474	1	ENME(914.5338)LEEK+Incorrect Mono 1Da	1016	snf2h	snf2h5	9.1	TIGYK(1002.4328)VPR+Incorrect Mono 1Da	801	snf2h	snf2h_hand	4.5	unique	38	2.5	adpbefx	2.5
991.98	4	1.2	Z20170518-31a_filtered	57.153	1	GGPEGVAAQAVASAASAGPADAE(690.4065)MEEIFDDASPGK+Incorrect Mono 1Da	59	snf2h	snf2h1	46.5	K(3254.4674)TIGYK+Incorrect Mono 1Da	796	snf2h	snf2h_hand	-3.4	positional variants	36.5	2.5	adpbefx	1.5
798.874	4	-0.2	Z20170518-33b_filtered	41.016	1	QK(1458.6515)EIQEPDPTYEEK	73	snf2h	snf2h1	56.9	EIQEPDPTYE(1714.8050)EK	83	snf2h	snf2h1	26.4	positional variants	24.3	2.5	adpbefx	2.6
694.833	4	-0.4	Z20170518-33a_filtered	44.479	1	E(1298.6408)IQEPDPTYEEK	74	snf2h	snf2h1	40.1	K(1458.6515)ANYAVDAYFR	741	snf2h	snf2h_hand	24.8	unique	31.3	2.5	adpbefx	3
798.874	4	-0.2	Z20170518-33b_filtered	41.016	1	QK(1458.6515)EIQEPDPTYEEK	73	snf2h	snf2h1	56.9	EIQEPDPTYEE(1714.8050)K	84	snf2h	snf2h_auton	23.4	positional variants	24.3	2.5	adpbefx	2.6
792.209	5	0.7	Z20170518-33b_filtered	68.174	1	FQSSAVM(Oxidation)ALQEASEAYLVALFE(501.2911)DTNLAAIHAK+Incorrect Mono 1Da	105	h3	h3	37.4	SAK(3435.7021)SK+Incorrect Mono 1Da	127	h2a	h2a_ctail	-2.3	unique	44.2	2.5	adpbefx	2
1095.05	4	2.1	Z20170518-31a_filtered	59.692	1	VTIAQGGVLPNIQSVLLPK(2300.9168)K+Incorrect Mono 1Da	118	h2a	h2a_ctail	15.9	NFTM(Oxidation)DTE(2056.2408)SSVYNFEGEDYR+Incorrect Mono 1Da	710	snf2h	snf2h4	5.2	positional variants	32.3	2.5	adpbefx	1.3
1242.86	4	-0.4	Z20170518-31a_filtered	70.568	1	GGPE(1693.9443)GVAAQAVASAASAGPADAEMEEIFDDASPGK+Incorrect Mono 1Da	40	snf2h	snf2h1	45.7	LFELLEK(3254.4674)EILFYR+Incorrect Mono 1Da	789	snf2h	snf2h_hand	10.1	unique	29.4	2.5	adpbefx	2
709.715	3	0.2	Z20170518-33a_filtered	23.974	1	ISGLIYE(946.5084)ETR	52	h4	h4	55.7	KTESSK(1161.6030)SAK	124	h2a	h2a_ctail	22.4	unique	26.5	2.5	adpbefx	4.3
1095.05	4	2.1	Z20170518-31a_filtered	59.692	1	VTIAQGGVLPNIQSVLLPK(2300.9168)K+Incorrect Mono 1Da	118	h2a	h2a_ctail	15.9	NFTM(Oxidation)D(2056.2408)TESSVYNFEGEDYR+Incorrect Mono 1Da	708	snf2h	snf2h4	5.2	positional variants	32.3	2.5	adpbefx	1.3
485.062	5	0.3	Z20170518-33b_filtered	37.259	1	NPE(1140.6192)LPNAAQAQK	807	snf2h	snf2h_hand	40.1	YK(1261.6415)APFHQLR	931	snf2h	snf2h_slide	24.1	unique	32.6	2.5	adpbefx	7
793.161	4	-0.5	Z20170518-33b_filtered	40.831	1	NPELPNAAQAQK(1261.6415)EEQLK	816	snf2h	snf2h_hand	72.2	NPE(1888.9643)LPNAAQAQK	807	snf2h	snf2h_hand	29.7	unique	24.8	2.5	adpbefx	3.5
1023.49	3	-0.8	Z20170518-33a_filtered	55.094	1	DFNQFIK(1714.7897)ANEK	857	snf2h	snf2h_sant	27.8	ESE(1334.6619)ITDEDIDGILER	670	snf2h	snf2h_negc	23.9	positional variants	32	2.5	adpbefx	1.5
983.475	4	0.6	Z20170518-33b_filtered	56.879	1	GGPEGVAAQAVASAASAGPADAEME(656.3857)EIFDDASPGK+Incorrect Mono 1Da	61	snf2h	snf2h1	58.8	K(3254.4674)ALDTK+Incorrect Mono 1Da	921	snf2h	snf2h_slide	-0.7	positional variants	32.9	2.5	adpbefx	1.7
994.481	4	-1.3	Z20170518-31a_filtered	49.496	1	HGATHVFASK(1204.5724)ESEITDEDIDGILER+Incorrect Mono 1Da	667	snf2h	snf2h_negc	56.9	FITD(2750.3148)NTVEER+Incorrect Mono 1Da	612	snf2h	snf2h_reca2	11.4	unique	27.5	2.5	adpbefx	4.5
980.505	5	-1	Z20170518-31a_filtered	71.146	1	FQSSAVMALQEASEAYLVALFE(1458.7732)DTNLAAIHAK+Incorrect Mono 1Da	105	h3	h3	48.4	LLTQGFTNWNK(3419.7071)R+Incorrect Mono 1Da	849	snf2h	snf2h_sant	0.2	unique	37.1	2.5	adpbefx	4.5
945.085	5	-0.2	Z20170518-33b_filtered	72.704	1	FQSSAVMALQEASEAYLVALFE(1281.6677)DTNLAAIHAK+Incorrect Mono 1Da	105	h3	h3	31.1	NDEELNK(3419.7071)LLGR+Incorrect Mono 1Da	95	h2a	h2a_ap	1.1	unique	41.5	2.5	adpbefx	5.5
1245.67	3	-2.3	Z20170518-31a_filtered	83.12	1	VGAGAPVYLAAVLEYLTAE(818.4035)ILELAGNAAR+Incorrect Mono 1Da	61	h2a	h2a_ap	43	K(2896.5698)GNYAER+Incorrect Mono 1Da	36	h2a	h2a	-1	unique	45.9	2.5	adpbefx	5
1131.8	4	0.7	Z20170518-32b_filtered	43.72	1	1161.6030-GSM(Oxidation)SSAAEPPPPPPPESAPSKPAASIASGGSNSSNK	1	snf2h	snf2h1	38.8	ISGLIYEE(3343.5627)TR	53	h4	h4	6.7	positional variants	19.6	2.5	adpbefx	3
983.475	4	0.6	Z20170518-33b_filtered	56.879	1	GGPEGVAAQAVASAASAGPADAEMEE(656.3857)IFDDASPGK+Incorrect Mono 1Da	62	snf2h	snf2h1	58.1	K(3254.4674)ALDTK+Incorrect Mono 1Da	921	snf2h	snf2h_slide	-0.7	positional variants	32.9	2.5	adpbefx	1.3
714.549	5	-2.8	Z20170518-31a_filtered	43.971	1	K(1903.8647)DEKQNLLSVGDYR	131	snf2h	snf2h_auton	29.4	RTEQEED(1645.8424)EELLTESSK	153	snf2h	snf2h_auton	24.4	positional variants	32.5	2.4	adpbefx	4.4
936.72	4	0.6	Z20170518-33b_filtered	55.591	1	NPELPNAAQAQK(1835.8730)EEQLK	816	snf2h	snf2h_hand	38.8	TPEEVIE(1888.9643)YSAVFWER	884	snf2h	snf2h_sant	32.8	positional variants	27.8	2.4	adpbefx	1.3
704.01	3	-0.6	Z20170518-33a_filtered	37.299	1	LSK(1002.4328)MGESSLR	696	snf2h	snf2h_negc	31.1	ENMELE(1088.5648)EK	1018	snf2h	snf2h5	22.6	unique	28.7	2.4	adpbefx	1.5
956.178	4	0.8	Z20170518-33b_filtered	56.193	1	NFTMDTESSVYNFE(1517.7474)GEDYR	717	snf2h	snf2h4	64.7	DEK(2284.9219)QNLLSVGDYR	134	snf2h	snf2h_auton	23.8	unique	23.3	2.4	adpbefx	1.6
949.451	3	0.8	Z20170518-33a_filtered	51.771	1	TEQEEDE(1079.5553)ELLTESSK	154	snf2h	snf2h_auton	39.3	FDWFLK(1747.7636)SR	992	snf2h	snf2h_slide	21.3	unique	29.8	2.4	adpbefx	1.5
677.307	4	0.3	Z20170518-33b_filtered	37.811	1	IDEAE(943.4182)SLNDEELEEK	826	snf2h	snf2h_hand	44.2	K(1743.7687)M(Oxidation)DGAPDGR	1038	snf2h	snf2h5	19.1	positional variants	27	2.4	adpbefx	1.5
957.844	3	2.3	Z20170518-33b_filtered	60.332	1	ESE(1136.6991)ITDEDIDGILER+Incorrect Mono 1Da	670	snf2h	snf2h_negc	28.5	MVVLDK(1714.7897)LLPK+Incorrect Mono 1Da	492	snf2h	snf2h_reca2	11.2	positional variants	33.5	2.4	adpbefx	1.6
726.857	4	-0.7	Z20170518-33a_filtered	41.853	1	IDEAE(1140.6192)SLNDEELEEK+Incorrect Mono 1Da	826	snf2h	snf2h_hand	21.6	YK(1743.7687)APFHQLR+Incorrect Mono 1Da	931	snf2h	snf2h_slide	13.8	unique	36.3	2.4	adpbefx	2.8
522.273	4	-0.9	Z20170518-33a_filtered	37.951	1	ANYAVD(896.5080)AYFR	747	snf2h	snf2h_hand	33.5	K(1170.5458)SAPATGGVK	27	h3	h3_tail	25.6	unique	29.4	2.4	adpbefx	2
917.207	4	1	Z20170518-33b_filtered	64.821	1	DVLLPGE(1298.6408)WDVC(Carbamidomethyl)VTSYEMLIK	281	snf2h	snf2h_reca1	40.4	K(2348.1432)ANYAVDAYFR	741	snf2h	snf2h_hand	24.4	positional variants	31.9	2.4	adpbefx	1.5
702.373	3	1.5	Z20170518-33a_filtered	42.961	1	ANYAVD(914.5338)AYFR+Incorrect Mono 1Da	747	snf2h	snf2h_hand	16.2	TIGYK(1170.5458)VPR+Incorrect Mono 1Da	801	snf2h	snf2h_hand	6.8	unique	34.8	2.4	adpbefx	5
959.243	4	0.3	Z20170518-33b_filtered	61.066	1	DVLLPGEWDVC(Carbamidomethyl)VTSYE(1192.6505)M(Oxidation)LIKEK+Incorrect Mono 1Da	290	snf2h	snf2h_reca1	10	SVFK(2621.2757)KFNWR+Incorrect Mono 1Da	300	snf2h	snf2h_reca1	3.4	positional variants	39.9	2.4	adpbefx	4.3
493.244	4	-0.1	Z20170518-33a_filtered	33.144	1	ISYGTNK(1002.4328)GK	945	snf2h	snf2h_slide	34.2	E(948.5029)NMELEEK	1013	snf2h	snf2h_slide	26.9	unique	32.3	2.4	adpbefx	1.5
610.564	4	0.8	Z20170518-33b_filtered	49.871	1	LGFDK(841.4480)ENVYDELR	968	snf2h	snf2h_slide	36.5	IMAQIE(1578.7678)R	907	snf2h	snf2h_slide	27.5	unique	28.6	2.4	adpbefx	4
647.69	3	0	Z20170518-33a_filtered	42.749	1	K(485.2598)TVTAM(Oxidation)DVVYALK+Incorrect Mono 1Da	79	h4	h4	42.4	TD(1435.7745)LR+Incorrect Mono 1Da	81	h3	h3	-1.6	unique	26.6	2.4	adpbefx	17.5
495.07	5	-0.4	Z20170518-33b_filtered	49.285	1	IAFTEWIE(1140.6192)PPK	734	snf2h	snf2h4	41.5	YK(1311.6863)APFHQLR	931	snf2h	snf2h_slide	25.3	unique	30.8	2.4	adpbefx	2.5
610.131	5	3.2	Z20170518-33b_filtered	53.707	1	EK(1467.7874)LLTQGFTNWNK	838	snf2h	snf2h_hand	46.1	IAFTE(1559.8096)WIEPPKR	731	snf2h	snf2h4	20.5	unique	27.5	2.4	adpbefx	1.5
579.043	4	-3	Z20170518-33a_filtered	40.914	1	LSK(1204.5724)MGESSLR+Incorrect Mono 1Da	696	snf2h	snf2h_negc	18.1	FITDNTVEE(1088.5648)R+Incorrect Mono 1Da	617	snf2h	snf2h_reca2	5	positional variants	33.5	2.4	adpbefx	2
579.043	4	-3	Z20170518-33a_filtered	40.914	1	LSK(1204.5724)MGESSLR+Incorrect Mono 1Da	696	snf2h	snf2h_negc	18.1	FITDNTVE(1088.5648)ER+Incorrect Mono 1Da	616	snf2h	snf2h_reca2	5	positional variants	33.5	2.4	adpbefx	3
553.533	4	-0.5	Z20170518-33a_filtered	52.649	1	VLDILED(597.3598)YC(Carbamidomethyl)MWR+Incorrect Mono 1Da	519	snf2h	snf2h_reca2	22.4	GGK(1593.7320)GLGK+Incorrect Mono 1Da	8	h4	h4_tail	0.8	unique	35.7	2.4	adpbefx	3
488.485	5	-0.1	Z20170518-33b_filtered	43.012	1	TPTSPLK(872.5008)MKPGRPR	121	snf2h	snf2h_auton	24.5	LFELLE(1546.8766)K	788	snf2h	snf2h_hand	23.3	unique	30.2	2.4	adpbefx	2
1098.29	4	2.5	Z20170518-31a_filtered	44.632	1	1026.5346-GSM(Oxidation)SSAAEPPPPPPPESAPSKPAASIASGGSNSSNK+Incorrect Mono 1Da	1	snf2h	snf2h1	94.2	DID(3343.5627)ILNSAGK+Incorrect Mono 1Da	435	snf2h	snf2h_reca2	13.9	positional variants	19.1	2.4	adpbefx	4.5
984.872	5	0.2	Z20170518-32b_filtered	60.778	1	GGPEGVAAQAVASAASAGPAD(1645.8424)AEMEEIFDDASPGK+Incorrect Mono 1Da	57	snf2h	snf2h1	33.8	KDEK(3254.4674)QNLLSVGDYR+Incorrect Mono 1Da	134	snf2h	snf2h_auton	3.9	positional variants	27.8	2.4	adpbefx	1.7
689.717	5	-0.4	Z20170518-33b_filtered	49.608	1	NFTMDTESSVYNFEGE(1140.6192)DYR	719	snf2h	snf2h4	76	YK(2284.9219)APFHQLR	931	snf2h	snf2h_slide	13.8	unique	21.8	2.4	adpbefx	1.5
751.368	3	1.2	Z20170518-33a_filtered	34.622	1	TE(484.3009)QEEDEELLTESSK+Incorrect Mono 1Da	149	snf2h	snf2h_auton	42.8	K(1747.7636)EVK+Incorrect Mono 1Da	410	snf2h	snf2h_reca2	2.9	unique	27	2.4	adpbefx	2
700.588	4	0.8	Z20170518-33b_filtered	36.043	1	RTEQE(876.4454)EDEELLTESSK	151	snf2h	snf2h_auton	58.9	EFK(1903.8647)TTNR	330	snf2h	snf2h_reca1	13.2	unique	20.4	2.4	adpbefx	1.5
671.584	4	0.1	Z20170518-33a_filtered	46.466	1	ESEITD(948.5029)EDIDGILER+Incorrect Mono 1Da	673	snf2h	snf2h_negc	30.6	ISYGTNK(1714.7897)GK+Incorrect Mono 1Da	945	snf2h	snf2h_slide	0.6	positional variants	32.2	2.4	adpbefx	1.2
784.381	4	-0.7	Z20170518-33b_filtered	56.862	1	ESEITDE(1400.6970)DIDGILER	674	snf2h	snf2h_negc	31.9	DIDILNSAGK(1714.7897)MDK	442	snf2h	snf2h_reca2	24.4	unique	28.9	2.4	adpbefx	1.3
671.584	4	0.1	Z20170518-33a_filtered	46.466	1	ESEITDE(948.5029)DIDGILER+Incorrect Mono 1Da	674	snf2h	snf2h_negc	30.6	ISYGTNK(1714.7897)GK+Incorrect Mono 1Da	945	snf2h	snf2h_slide	0.6	positional variants	32.2	2.4	adpbefx	1.2
984.872	5	0.2	Z20170518-32b_filtered	60.778	1	GGPEGVAAQAVASAASAGPAD(1645.8424)AEMEEIFDDASPGK+Incorrect Mono 1Da	57	snf2h	snf2h1	33.8	K(3254.4674)DEKQNLLSVGDYR+Incorrect Mono 1Da	131	snf2h	snf2h_auton	3.3	positional variants	27.8	2.4	adpbefx	1.3
701.605	4	1.3	Z20170518-33b_filtered	52.841	1	TPEEVIE(948.5029)YSAVFWER	884	snf2h	snf2h_sant	42.5	ISYGTNK(1835.8730)GK	945	snf2h	snf2h_slide	18.6	unique	26.4	2.4	adpbefx	3
647.373	4	1.2	Z20170518-33a_filtered	66.672	1	LFE(1693.9443)LLEK+Incorrect Mono 1Da	785	snf2h	snf2h_hand	10.8	LFELLEK(872.5008)EILFYR+Incorrect Mono 1Da	789	snf2h	snf2h_hand	9.6	unique	37	2.4	adpbefx	2.5
1156.37	5	3.6	Z20170518-31a_filtered	66.915	1	GGPEGVAAQAVASAASAGPAD(2503.3264)AEMEEIFDDASPGK+Incorrect Mono 1Da	57	snf2h	snf2h1	73.2	FEYLLK(3254.4674)QTELFAHFIQPAAQK+Incorrect Mono 1Da	99	snf2h	snf2h_auton	2.5	unique	24.2	2.4	adpbefx	2.2
1039.75	4	0.1	Z20170518-31a_filtered	36.603	1	809.4032-GSMSSAAEPPPPPPPESAPSKPAASIASGGSNSSNK	1	snf2h	snf2h1	63.8	HAVSE(3327.5677)GTK	110	h2b	h2b_ap	-0.2	unique	20.3	2.4	adpbefx	8.3
732.38	3	-1.4	Z20170518-33a_filtered	45.366	1	DFNQFIK(841.4480)ANEK	857	snf2h	snf2h_sant	41.2	IMAQIE(1334.6619)R	907	snf2h	snf2h_slide	19.6	unique	26.6	2.4	adpbefx	2
832.422	3	-0.9	Z20170518-33a_filtered	37.724	1	QDSINAYNE(914.5338)PNSTK	549	snf2h	snf2h_reca2	57.9	TIGYK(1561.7009)VPR	801	snf2h	snf2h_hand	13.6	unique	22.1	2.4	adpbefx	3
601.814	4	-0.5	Z20170518-33a_filtered	48.637	1	LLTQGFTNWNK(926.4458)R	849	snf2h	snf2h_sant	38.9	D(1458.7732)DIENIAR	865	snf2h	snf2h_sant	22.3	unique	27.3	2.4	adpbefx	2.7
484.455	5	-0.3	Z20170518-33b_filtered	42.463	1	IAFTE(931.4433)WIEPPKR	731	snf2h	snf2h4	28.6	K(1467.7874)TAEMNEK	686	snf2h	snf2h_negc	24.1	unique	32.6	2.4	adpbefx	4
757.604	5	0.9	Z20170518-31a_filtered	56.691	1	FEYLLK(1261.6415)QTELFAHFIQPAAQK	99	snf2h	snf2h_auton	67.8	NPE(2503.3264)LPNAAQAQK	807	snf2h	snf2h_hand	26.6	unique	23.8	2.4	adpbefx	2
728.414	3	-1	Z20170518-33a_filtered	61.807	1	LFELLEK(469.2649)EILFYR+Incorrect Mono 1Da	789	snf2h	snf2h_hand	20.1	E(1693.9443)ALR+Incorrect Mono 1Da	752	snf2h	snf2h_hand	-2.3	unique	34.5	2.4	adpbefx	5
810.654	4	1.6	Z20170518-33b_filtered	61.262	1	AM(Oxidation)SIM(Oxidation)NSFVND(1447.7857)VFER	65	h2b	h2b	25.7	TVTAMDVVYALK(1772.7862)R	91	h4	h4	24.4	positional variants	24.8	2.4	adpbefx	10
781.413	5	0.1	Z20170518-31a_filtered	49.987	1	TVTAMD(1399.7208)VVYALKRQGRTLYGFGG	85	h4	h4	39	DAVTYTEHAK(2484.2947)RK	77	h4	h4	25.2	unique	28.8	2.4	adpbefx	18.5
457.24	6	-0.1	Z20170518-33b_filtered	45.341	1	LGFDKENVYDE(1140.6192)LR	974	snf2h	snf2h_slide	41.4	YK(1578.7678)APFHQLR	931	snf2h	snf2h_slide	31.2	unique	32.8	2.4	adpbefx	7.5
957.844	3	2.3	Z20170518-33b_filtered	60.332	1	E(1136.6991)SEITDEDIDGILER+Incorrect Mono 1Da	668	snf2h	snf2h_negc	27.5	MVVLDK(1714.7897)LLPK+Incorrect Mono 1Da	492	snf2h	snf2h_reca2	11.2	positional variants	32.5	2.3	adpbefx	1.6
791.052	3	-1.1	Z20170518-33a_filtered	43.832	1	K(1052.4815)ANYAVDAYFR+Incorrect Mono 1Da	741	snf2h	snf2h_hand	26.2	FE(1298.6408)DSPSYVK+Incorrect Mono 1Da	171	snf2h	snf2h2	13.8	unique	30.1	2.3	adpbefx	3.5
687.107	4	-0.5	Z20170518-33b_filtered	55.911	1	Q(Gln->pyro-Glu)K(1018.4720)IAFTEWIEPPKR+Incorrect Mono 1Da	726	snf2h	snf2h4	33.5	E(1706.9144)NVYDELR+Incorrect Mono 1Da	969	snf2h	snf2h_slide	15.4	unique	31.6	2.3	adpbefx	2
896.225	4	0.8	Z20170518-31a_filtered	58.455	1	Q(Gln->pyro-Glu)TELFAHFIQPAAQK(1145.5829)TPTSPLK	114	snf2h	snf2h_auton	46.2	QNLLSVGD(2417.2743)YR	142	snf2h	snf2h_auton	18.1	unique	24.6	2.3	adpbefx	2
1000.26	4	3.2	Z20170518-31a_filtered	51.745	1	QTELFAHFIQPAAQK(1544.6743)TPTSPLK	114	snf2h	snf2h_auton	66.8	Q(Gln->pyro-Glu)DSINAYNE(2434.3009)PNSTK	549	snf2h	snf2h_reca2	20.6	unique	20.7	2.3	adpbefx	5
930.05	5	-2.2	Z20170518-31a_filtered	44.102	1	GSMSSAAE(1298.6408)PPPPPPPESAPSKPAASIASGGSNSSNK+Incorrect Mono 1Da	8	snf2h	snf2h1	50	K(3327.5677)ANYAVDAYFR+Incorrect Mono 1Da	741	snf2h	snf2h_hand	16.6	unique	26	2.3	adpbefx	4
589.922	5	1.1	Z20170518-33b_filtered	53.001	1	IAFTE(1458.7732)WIEPPKR	731	snf2h	snf2h4	30.5	LLTQGFTNWNK(1467.7874)R	849	snf2h	snf2h_sant	24.9	unique	27.8	2.3	adpbefx	6
755.359	5	-1.2	Z20170518-31a_filtered	48.837	1	HGATHVFASK(1002.4328)ESEITDEDIDGILER+Incorrect Mono 1Da	667	snf2h	snf2h_negc	42.5	ENMELE(2750.3148)EK+Incorrect Mono 1Da	1018	snf2h	snf2h5	6.8	unique	25.4	2.3	adpbefx	2.8
694.758	5	0.2	Z20170518-31a_filtered	37.005	1	RTEQEEDEE(1546.8766)LLTESSK	155	snf2h	snf2h_auton	37	TPTSPLK(1903.8647)MKPGRPR	121	snf2h	snf2h_auton	25.2	positional variants	27	2.3	adpbefx	4.7
963.68	5	-0.2	Z20170518-31a_filtered	48.817	1	1467.7874-GSMSSAAEPPPPPPPESAPSKPAASIASGGSNSSNK	1	snf2h	snf2h1	75.5	IAFTEWIE(3327.5677)PPKR	734	snf2h	snf2h4	7.5	unique	18.9	2.3	adpbefx	10
846.88	4	0	Z20170518-33a_filtered	57.903	1	NFTMDTESSVYNFE(1079.5553)GEDYR+Incorrect Mono 1Da	717	snf2h	snf2h4	24.4	FDWFLK(2284.9219)SR+Incorrect Mono 1Da	992	snf2h	snf2h_slide	-2.5	unique	30.2	2.3	adpbefx	3.3
825.653	5	-0.3	Z20170518-31a_filtered	79.281	1	VGAGAPVYLAAVLEYLTAE(1208.6513)ILELAGNAAR	61	h2a	h2a_ap	93.2	HAVSEGTK(2896.5698)AVTK	113	h2b	h2b_ap	9.9	unique	18.5	2.3	adpbefx	5
683.84	4	-0.4	Z20170518-33a_filtered	53.006	1	TPEEVIE(876.4454)YSAVFWER+Incorrect Mono 1Da	884	snf2h	snf2h_sant	38	EFK(1835.8730)TTNR+Incorrect Mono 1Da	330	snf2h	snf2h_reca1	4.5	unique	24.4	2.3	adpbefx	3
979.677	6	0	Z20170518-31a_filtered	70.269	1	FQSSAVMALQEASEAYLVALFE(2434.3009)DTNLAAIHAK	105	h3	h3	64.1	QTELFAHFIQPAAQK(3419.7071)TPTSPLK	114	snf2h	snf2h_auton	17.9	unique	20.6	2.3	adpbefx	3
574.053	4	0.3	Z20170518-33b_filtered	37.389	1	YK(1132.5513)APFHQLR+Incorrect Mono 1Da	931	snf2h	snf2h_slide	23.7	Q(Gln->pyro-Glu)VHPD(1140.6192)TGISSK+Incorrect Mono 1Da	48	h2b	h2b	2	unique	33.1	2.3	adpbefx	8
508.79	4	-0.4	Z20170518-33b_filtered	44.85	1	YK(872.5008)APFHQLR	931	snf2h	snf2h_slide	31.7	LFE(1140.6192)LLEK	785	snf2h	snf2h_hand	28.1	unique	28.1	2.3	adpbefx	3
531.775	6	0.9	Z20170518-31a_filtered	54.328	1	TLQTISLLGYMK(1360.6234)HYR+Incorrect Mono 1Da	225	snf2h	snf2h_reca1	11.2	STLHNWMSE(1804.9658)FK+Incorrect Mono 1Da	249	snf2h	snf2h_reca1	6	unique	28.2	2.3	adpbefx	7
700.588	4	0.3	Z20170518-33b_filtered	36.639	1	RTEQEE(876.4454)DEELLTESSK	152	snf2h	snf2h_auton	52.9	EFK(1903.8647)TTNR	330	snf2h	snf2h_reca1	14.3	positional variants	21.6	2.3	adpbefx	1.5
627.336	5	1	Z20170518-33b_filtered	50.694	1	K(1467.7874)DEKQNLLSVGDYR	131	snf2h	snf2h_auton	31.8	IAFTE(1645.8424)WIEPPKR	731	snf2h	snf2h4	24.6	positional variants	30	2.3	adpbefx	2
438.744	6	0.4	Z20170518-31a_filtered	45.709	1	IAFTE(1140.6192)WIEPPKR	731	snf2h	snf2h4	28.1	YK(1467.7874)APFHQLR	931	snf2h	snf2h_slide	27.4	unique	24.4	2.3	adpbefx	4.5
1016.28	5	-0.1	Z20170518-31a_filtered	39.413	1	1714.8050-GSM(Oxidation)SSAAEPPPPPPPESAPSKPAASIASGGSNSSNK	1	snf2h	snf2h1	70.2	QKEIQEPDPTYE(3343.5627)EK	83	snf2h	snf2h1	10.5	positional variants	18.5	2.3	adpbefx	2.9
615.99	3	-1.4	Z20170518-35_filtered	33.402	1	SVC(Carbamidomethyl)LIGDK(540.2908)EQR+Incorrect Mono 1Da	266	snf2h	snf2h_reca1	13.4	VSE(1285.6449)PK+Incorrect Mono 1Da	758	snf2h	snf2h_hand	-0.1	unique	35.7	2.3	adpbefx	4
472.873	5	0.7	Z20170518-31a_filtered	40.16	1	FE(1546.8766)YLLK+Incorrect Mono 1Da	95	snf2h	snf2h_auton	7.5	TPTSPLK(793.4374)MKPGRPR+Incorrect Mono 1Da	121	snf2h	snf2h_auton	6.9	unique	35.4	2.3	adpbefx	11.5
466.843	5	0.8	Z20170518-33b_filtered	43.179	1	ANYAVD(1140.6192)AYFR	747	snf2h	snf2h_hand	32.4	YK(1170.5458)APFHQLR	931	snf2h	snf2h_slide	28.8	unique	31.9	2.3	adpbefx	4
956.427	4	-1.3	Z20170518-33b_filtered	55.889	1	NFTMDTE(1517.7474)SSVYNFEGEDYR+Incorrect Mono 1Da	710	snf2h	snf2h4	41.8	DEK(2284.9219)QNLLSVGDYR+Incorrect Mono 1Da	134	snf2h	snf2h_auton	29.1	unique	29.2	2.3	adpbefx	1.5
714.552	5	1.7	Z20170518-33b_filtered	45.177	1	RTEQEEDEELLTE(1645.8424)SSK	159	snf2h	snf2h_auton	38.8	K(1903.8647)DEKQNLLSVGDYR	131	snf2h	snf2h_auton	19.7	positional variants	27.5	2.2	adpbefx	1.8
731.813	5	1.8	Z20170518-32b_filtered	58.297	1	VTIAQGGVLPNIQSVLLPK(1578.7678)K+Incorrect Mono 1Da	118	h2a	h2a_ctail	8.3	LGFDKENVYDE(2056.2408)LR+Incorrect Mono 1Da	974	snf2h	snf2h_slide	1.7	unique	31.8	2.2	adpbefx	1.6
732.383	5	-1	Z20170518-31a_filtered	50.117	1	QTELFAHFIQPAAQK(1204.5724)TPTSPLK	114	snf2h	snf2h_auton	51.2	FITD(2434.3009)NTVEER	612	snf2h	snf2h_reca2	17.7	unique	24.3	2.2	adpbefx	7
663.538	5	0.7	Z20170518-31a_filtered	39.167	1	TEQEE(1546.8766)DEELLTESSK	152	snf2h	snf2h_auton	40.1	TPTSPLK(1747.7636)MKPGRPR	121	snf2h	snf2h_auton	18.2	positional variants	26.8	2.2	adpbefx	3.1
576.672	3	-0.6	Z20170518-33a_filtered	34.036	1	K(812.4756)SAPATGGVK	27	h3	h3_tail	35	STE(896.5080)LLIR	59	h3	h3	19.9	unique	26.2	2.2	adpbefx	2
1374.5	4	1.4	Z20170518-31a_filtered	74.334	1	FQSSAVMALQE(2056.2408)ASEAYLVALFEDTNLAAIHAK	94	h3	h3	26.8	VTIAQGGVLPNIQSVLLPK(3419.7071)K	118	h2a	h2a_ctail	19.9	positional variants	24.6	2.2	adpbefx	5.8
479.094	6	1.2	Z20170518-33b_filtered	44.273	1	QTE(1140.6192)LFAHFIQPAAQK	102	snf2h	snf2h_auton	27.2	YK(1709.8889)APFHQLR	931	snf2h	snf2h_slide	22.5	unique	28.3	2.2	adpbefx	3
532.547	4	-1.7	Z20170518-33a_filtered	60.235	1	LFELLEK(413.2023)EILFYR+Incorrect Mono 1Da	789	snf2h	snf2h_hand	32.5	GE(1693.9443)AR+Incorrect Mono 1Da	910	snf2h	snf2h_slide	-2.3	protein variants	30.6	2.2	adpbefx	4.5
698.877	6	2.4	Z20170518-31a_filtered	81.88	1	VGAGAPVYLAAVLEYLTAE(1271.6258)ILELAGNAAR+Incorrect Mono 1Da	61	h2a	h2a_ap	51.8	DAVTYTEHAK(2896.5698)R+Incorrect Mono 1Da	77	h4	h4	1.6	unique	27.3	2.2	adpbefx	5
711.342	4	1.6	Z20170518-33b_filtered	52.343	1	IDEAE(1079.5553)SLNDEELEEK	826	snf2h	snf2h_hand	41.2	FDWFLK(1743.7687)SR	992	snf2h	snf2h_slide	19.8	positional variants	27.7	2.2	adpbefx	1.3
580.531	4	0	Z20170518-33b_filtered	34.945	1	IDEAESLNDE(555.3129)ELEEK+Incorrect Mono 1Da	831	snf2h	snf2h_hand	24.8	GK(1743.7687)QGGK+Incorrect Mono 1Da	5	h2a	h2a_ntail	3.4	unique	26.4	2.2	adpbefx	1.3
633.324	4	1.4	Z20170518-33b_filtered	46.044	1	LLTQGFTNWNK(1052.4815)R	849	snf2h	snf2h_sant	45	FE(1458.7732)DSPSYVK	171	snf2h	snf2h2	16.6	unique	24.4	2.2	adpbefx	2
695.186	5	-0.3	Z20170518-33b_filtered	83.13	1	VGAGAPVYLAAVLEYLTAE(555.3129)ILELAGNAAR+Incorrect Mono 1Da	61	h2a	h2a_ap	49.1	GK(2896.5698)QGGK+Incorrect Mono 1Da	5	h2a	h2a_ntail	-1.3	unique	31.1	2.2	adpbefx	3
507.788	4	2.4	Z20170518-33b_filtered	44.127	1	YLVIDE(912.5393)AHR	311	snf2h	snf2h_reca1	29.3	SK(1096.5665)LSEIVR	321	snf2h	snf2h_reca1	28.9	unique	30.2	2.2	adpbefx	5
1045.25	4	-0.6	Z20170518-33b_filtered	42.368	1	831.4127-GSMSSAAEPPPPPPPESAPSKPAASIASGGSNSSNK	1	snf2h	snf2h1	58.8	E(3327.5677)IAQDFK	73	h3	h3	1.4	positional variants	21.7	2.2	adpbefx	2.5
1120.54	4	0.5	Z20170518-31a_filtered	41.569	1	1132.5513-GSMSSAAEPPPPPPPESAPSKPAASIASGGSNSSNK	1	snf2h	snf2h1	79.8	Q(Gln->pyro-Glu)VHPD(3327.5677)TGISSK	48	h2b	h2b	3.6	unique	18.1	2.2	adpbefx	12
797.005	5	0.5	Z20170518-31a_filtered	59.413	1	FEYLLK(1458.6515)QTELFAHFIQPAAQK	99	snf2h	snf2h_auton	59.7	EIQE(2503.3264)PDPTYEEK	77	snf2h	snf2h1	20.1	positional variants	24.5	2.2	adpbefx	1.5
524.464	5	0.7	Z20170518-33b_filtered	39.803	1	EIQE(1140.6192)PDPTYEEK	77	snf2h	snf2h1	39.9	YK(1458.6515)APFHQLR	931	snf2h	snf2h_slide	20.1	unique	27.6	2.2	adpbefx	4.5
489.025	4	1.9	Z20170518-33b_filtered	42.861	1	YK(793.4374)APFHQLR	931	snf2h	snf2h_slide	30.1	FE(1140.6192)YLLK	95	snf2h	snf2h_auton	24.4	unique	30	2.2	adpbefx	5
1061.52	3	-2.4	Z20170518-33b_filtered	61.66	1	Q(Gln->pyro-Glu)PNVQD(1578.7678)FQFFPPR+Incorrect Mono 1Da	775	snf2h	snf2h_hand	21.4	LGFDK(1583.7521)ENVYDELR+Incorrect Mono 1Da	968	snf2h	snf2h_slide	19.4	unique	29.3	2.2	adpbefx	1.5
878.739	3	3	Z20170518-33a_filtered	46.713	1	LGFDK(1036.4098)ENVYDELR	968	snf2h	snf2h_slide	49.2	NYTEE(1578.7678)EDR	952	snf2h	snf2h_slide	22.8	positional variants	25	2.2	adpbefx	1.5
663.573	4	-0.4	Z20170518-33b_filtered	49.679	1	LGFDK(1052.4815)ENVYDELR+Incorrect Mono 1Da	968	snf2h	snf2h_slide	18.9	FE(1578.7678)DSPSYVK+Incorrect Mono 1Da	171	snf2h	snf2h2	14.8	unique	34.6	2.2	adpbefx	1.5
759.861	4	-1.3	Z20170518-33a_filtered	58.112	1	FEDSPSYVK(1593.7320)WGK	178	snf2h	snf2h2	24.2	VLDILE(1423.6772)DYC(Carbamidomethyl)MWR	518	snf2h	snf2h_reca2	21.7	positional variants	30.2	2.2	adpbefx	2
717.572	5	0.6	Z20170518-33b_filtered	50.642	1	QTELFAHFIQPAAQK(1129.5074)TPTSPLK+Incorrect Mono 1Da	114	snf2h	snf2h_auton	25.1	C(Carbamidomethyl)NE(2434.3009)LQDIEK+Incorrect Mono 1Da	895	snf2h	snf2h_slide	7.5	unique	29.5	2.2	adpbefx	4
731.018	3	-2.1	Z20170518-33a_filtered	34.134	1	IDE(427.2543)AESLNDEELEEK+Incorrect Mono 1Da	824	snf2h	snf2h_hand	35.6	GK(1743.7687)GGK+Incorrect Mono 1Da	5	h4	h4_tail	0.8	unique	28.6	2.2	adpbefx	2
962.051	5	-2.8	Z20170518-31a_filtered	42.597	1	1458.6515-GSMSSAAEPPPPPPPESAPSKPAASIASGGSNSSNK+Incorrect Mono 1Da	1	snf2h	snf2h1	94	EIQEPD(3327.5677)PTYEEK+Incorrect Mono 1Da	79	snf2h	snf2h1	14.4	positional variants	17.3	2.2	adpbefx	6.7
826.415	6	0.6	Z20170518-31a_filtered	59.608	1	ANRFEYLLK(2089.9262)QTELFAHFIQPAAQK	99	snf2h	snf2h_auton	35.3	EIQEPDPTYEEKMQTD(2844.5075)R	89	snf2h	snf2h_auton	24.2	positional variants	30.7	2.2	adpbefx	4.2
705.603	4	0.5	Z20170518-33b_filtered	34.87	1	RTEQEE(896.5080)DEELLTESSK	152	snf2h	snf2h_auton	38.5	K(1903.8647)SAPATGGVK	27	h3	h3_tail	19.9	unique	24	2.2	adpbefx	2.3
657.696	3	0.3	Z20170518-33a_filtered	58.238	1	FDWFLK(872.5008)SR	992	snf2h	snf2h_slide	24.9	LFELLE(1079.5553)K	788	snf2h	snf2h_hand	21.4	unique	28.4	2.2	adpbefx	4
724.022	3	-0.5	Z20170518-33a_filtered	39.766	1	E(1131.5594)NVYDELR+Incorrect Mono 1Da	969	snf2h	snf2h_slide	14.2	TAEMNEK(1018.4720)LSK+Incorrect Mono 1Da	693	snf2h	snf2h_negc	6.8	unique	33.7	2.2	adpbefx	2
578.306	5	0.1	Z20170518-33b_filtered	55.152	1	DIDILNSAGK(1467.7874)MDK	442	snf2h	snf2h_reca2	38.4	IAFTE(1400.6970)WIEPPKR	731	snf2h	snf2h4	20.5	unique	29	2.2	adpbefx	3
841.704	4	1.1	Z20170518-33b_filtered	58.939	1	FEYLLK(841.4480)QTELFAHFIQPAAQK	99	snf2h	snf2h_auton	57.4	IMAQIE(2503.3264)R	907	snf2h	snf2h_slide	14.6	unique	23.1	2.2	adpbefx	4
892.635	5	-0.1	Z20170518-31a_filtered	41.365	1	1096.5665-GSM(Oxidation)SSAAEPPPPPPPESAPSKPAASIASGGSNSSNK	1	snf2h	snf2h1	88	YLVIDE(3343.5627)AHR	311	snf2h	snf2h_reca1	0.2	positional variants	15.8	2.2	adpbefx	4.5
766.665	4	0.2	Z20170518-33b_filtered	56.642	1	FEYLLK(540.2908)QTELFAHFIQPAAQK+Incorrect Mono 1Da	99	snf2h	snf2h_auton	50.7	VSE(2503.3264)PK+Incorrect Mono 1Da	758	snf2h	snf2h_hand	1.5	unique	27.7	2.2	adpbefx	8
602.028	4	-0.6	Z20170518-33b_filtered	36.24	1	E(927.4232)IQEPDPTYEEK	74	snf2h	snf2h1	49	K(1458.6515)MDGAPDGR	1038	snf2h	snf2h5	21.6	unique	25.6	2.2	adpbefx	3
575.648	3	-0.5	Z20170518-33a_filtered	22.96	1	K(809.4032)SAPATGGVK	27	h3	h3_tail	34.5	HAVSE(896.5080)GTK	110	h2b	h2b_ap	24.1	unique	26.4	2.2	adpbefx	3
932.922	5	0.5	Z20170518-33b_filtered	82.266	1	VGAGAPVYLAAVLEYLTAE(1743.9883)ILELAGNAAR+Incorrect Mono 1Da	61	h2a	h2a_ap	48.8	LLLPGELAK(2896.5698)HAVSEGTK+Incorrect Mono 1Da	105	h2b	h2b_ap	6.8	unique	27	2.2	adpbefx	5
678.354	4	1	Z20170518-33a_filtered	55.603	1	TPE(854.4974)EVIEYSAVFWER+Incorrect Mono 1Da	880	snf2h	snf2h_sant	31.4	ALDTK(1835.8730)IGR+Incorrect Mono 1Da	926	snf2h	snf2h_slide	4	positional variants	26.4	2.1	adpbefx	1.5
748.012	5	1.2	Z20170518-31a_filtered	63.845	1	ANRFEYLLK(872.5008)QTELFAHFIQPAAQK	99	snf2h	snf2h_auton	62.3	LFELLE(2844.5075)K	788	snf2h	snf2h_hand	21.9	unique	23.2	2.1	adpbefx	5
678.354	4	1	Z20170518-33a_filtered	55.603	1	TPEE(854.4974)VIEYSAVFWER+Incorrect Mono 1Da	881	snf2h	snf2h_sant	31.4	ALDTK(1835.8730)IGR+Incorrect Mono 1Da	926	snf2h	snf2h_slide	4	positional variants	26.4	2.1	adpbefx	1.5
724.702	3	-0.6	Z20170518-33a_filtered	36.802	1	FITDNTVEE(948.5029)R	617	snf2h	snf2h_reca2	34.6	ISYGTNK(1204.5724)GK	945	snf2h	snf2h_slide	19.3	unique	26.9	2.1	adpbefx	1.5
1074.52	3	0.1	Z20170518-33b_filtered	49.188	1	IDEAESLNDEELEE(1458.7732)K	835	snf2h	snf2h_hand	42.8	LLTQGFTNWNK(1743.7687)R	849	snf2h	snf2h_sant	18	unique	22.7	2.1	adpbefx	1.2
642.314	4	0.5	Z20170518-33b_filtered	39.454	1	E(1088.5648)IQEPDPTYEEK	74	snf2h	snf2h1	56	LSK(1458.6515)MGESSLR	696	snf2h	snf2h_negc	17.9	unique	24.9	2.1	adpbefx	2
637.519	6	1	Z20170518-31a_filtered	69.537	1	GVLK(1317.7041)VFLENVIRDAVTYTEHAK	59	h4	h4	78.7	RISGLIYE(2483.3536)ETR	52	h4	h4	8.8	positional variants	15.3	2.1	adpbefx	37.8
500.019	4	0.8	Z20170518-33a_filtered	21.9	1	NDE(1135.6574)ELNK	91	h2a	h2a_ap	21.9	RGPKPSTQK(842.3770)R	1036	snf2h	snf2h5	21.4	unique	26.7	2.1	adpbefx	1.3
618.573	4	-0.2	Z20170518-33a_filtered	51.196	1	EK(892.4443)LLTQGFTNWNK	838	snf2h	snf2h_hand	58.4	D(1559.8096)FNQFIK	851	snf2h	snf2h_sant	12.9	unique	17.6	2.1	adpbefx	3
621.53	5	2.2	Z20170518-33b_filtered	55.78	1	APRPPK(836.4221)QPNVQDFQFFPPR+Incorrect Mono 1Da	769	snf2h	snf2h_hand	16.3	FD(2247.1701)WFLK+Incorrect Mono 1Da	988	snf2h	snf2h_slide	5.5	unique	30.6	2.1	adpbefx	3
526.006	4	-0.8	Z20170518-33a_filtered	49.133	1	FDWFLK(1002.4328)SR	992	snf2h	snf2h_slide	29.4	E(1079.5553)NMELEEK	1013	snf2h	snf2h_slide	20.3	unique	28.8	2.1	adpbefx	3.3
648.083	4	0.1	Z20170518-33b_filtered	50.217	1	ESEITD(854.4974)EDIDGILER+Incorrect Mono 1Da	673	snf2h	snf2h_negc	33	ALDTK(1714.7897)IGR+Incorrect Mono 1Da	926	snf2h	snf2h_slide	6.8	unique	27.7	2.1	adpbefx	2
588.797	4	-1.6	Z20170518-33a_filtered	52.08	1	IGK(1018.4720)DEMLQMIR	649	snf2h	snf2h_negc	35.5	E(1314.6788)NVYDELR	969	snf2h	snf2h_slide	27.7	unique	29.4	2.1	adpbefx	2
560.282	5	-0.3	Z20170518-33b_filtered	44.311	1	NPE(1516.7245)LPNAAQAQK	807	snf2h	snf2h_hand	36.3	STLHNWMSEFK(1261.6415)R	251	snf2h	snf2h_reca1	19.6	unique	27.4	2.1	adpbefx	2
900.476	4	1.2	Z20170518-31a_filtered	60.739	1	LLLPGELAK(1835.8730)HAVSEGTK	105	h2b	h2b_ap	24.6	TPEEVIE(1743.9883)YSAVFWER	884	snf2h	snf2h_sant	22.8	unique	29.3	2.1	adpbefx	3
791.761	3	-0.3	Z20170518-33b_filtered	52.57	1	EK(793.4374)LLTQGFTNWNK+Incorrect Mono 1Da	838	snf2h	snf2h_hand	28.9	FE(1559.8096)YLLK+Incorrect Mono 1Da	95	snf2h	snf2h_auton	5.5	unique	25.3	2.1	adpbefx	4
1073.69	5	1.5	Z20170518-31a_filtered	58.921	1	GGPEGVAAQAVASAASAGPAD(2089.9262)AEMEEIFDDASPGK+Incorrect Mono 1Da	57	snf2h	snf2h1	60	EIQEPDPTYEEK(3254.4674)MQTDR+Incorrect Mono 1Da	85	snf2h	snf2h_auton	8.6	positional variants	19.9	2.1	adpbefx	2
657.658	3	0.5	Z20170518-33a_filtered	33.146	1	ENME(948.5029)LEEK+Incorrect Mono 1Da	1016	snf2h	snf2h5	7.4	ISYGTNK(1002.4328)GK+Incorrect Mono 1Da	945	snf2h	snf2h_slide	0.2	unique	34.6	2.1	adpbefx	1.5
614.548	4	-1.4	Z20170518-33a_filtered	54.753	1	VLDILED(841.4195)YC(Carbamidomethyl)MWR+Incorrect Mono 1Da	519	snf2h	snf2h_reca2	17	ANEK(1593.7320)WGR+Incorrect Mono 1Da	861	snf2h	snf2h_sant	3.4	unique	31.1	2.1	adpbefx	2
979.153	3	-1.5	Z20170518-33a_filtered	64.369	1	TPE(1079.5553)EVIEYSAVFWER+Incorrect Mono 1Da	880	snf2h	snf2h_sant	32.6	FDWFLK(1835.8730)SR+Incorrect Mono 1Da	992	snf2h	snf2h_slide	4.6	unique	29.4	2.1	adpbefx	1.5
812.737	3	6.4	Z20170518-33b_filtered	36.843	1	TEQEEDE(668.3970)ELLTESSK+Incorrect Mono 1Da	154	snf2h	snf2h_auton	28.1	GLGK(1747.7636)GGAK+Incorrect Mono 1Da	12	h4	h4_tail	0.6	positional variants	27.2	2.1	adpbefx	1.5
627.791	4	0.2	Z20170518-33a_filtered	32.952	1	QDSINAYNE(927.4232)PNSTK	549	snf2h	snf2h_reca2	40.1	K(1561.7009)MDGAPDGR	1038	snf2h	snf2h5	25.9	unique	27.1	2.1	adpbefx	2
1025.24	4	0	Z20170518-31a_filtered	56.77	1	GGPEGVAAQAVASAASAGPADAEME(823.4552)EIFDDASPGK+Incorrect Mono 1Da	61	snf2h	snf2h1	47.7	GPK(3254.4674)PSTQK+Incorrect Mono 1Da	1031	snf2h	snf2h5	0.6	positional variants	27.1	2.1	adpbefx	1.3
810.415	5	-2.3	Z20170518-32b_filtered	60.46	1	VLDILE(2434.3009)DYC(Carbamidomethyl)MWR+Incorrect Mono 1Da	518	snf2h	snf2h_reca2	17.4	QTELFAHFIQPAAQK(1593.7320)TPTSPLK+Incorrect Mono 1Da	114	snf2h	snf2h_auton	15.2	positional variants	27.4	2.1	adpbefx	2.5
632.827	4	-0.7	Z20170518-33a_filtered	54.689	1	VLDILED(914.5338)YC(Carbamidomethyl)MWR+Incorrect Mono 1Da	519	snf2h	snf2h_reca2	16.2	TIGYK(1593.7320)VPR+Incorrect Mono 1Da	801	snf2h	snf2h_hand	5.2	unique	30.5	2.1	adpbefx	2
1004.3	5	0	Z20170518-31a_filtered	62.121	1	GGPEGVAAQAVASAASAGPADAEMEEIFDD(1743.9883)ASPGK	66	snf2h	snf2h1	83.2	LLLPGELAK(3254.4674)HAVSEGTK	105	h2b	h2b_ap	8.8	unique	14.6	2.1	adpbefx	1.2
765.115	4	-0.4	Z20170518-33b_filtered	50.349	1	LGFDK(1458.6515)ENVYDELR+Incorrect Mono 1Da	968	snf2h	snf2h_slide	17.3	EIQEPDPTYE(1578.7678)EK+Incorrect Mono 1Da	83	snf2h	snf2h1	2.7	unique	33.5	2.1	adpbefx	1.5
861.493	4	6	Z20170518-31a_filtered	82.695	1	VGAGAPVYLAAVLEYLTAE(527.3431)ILELAGNAAR	61	h2a	h2a_ap	103	K(2896.5698)AVTK	13	h2b	h2b_tail	4.6	unique	13.1	2.1	adpbefx	2
1042.49	4	2.2	Z20170518-31a_filtered	51.458	1	GGPE(876.4454)GVAAQAVASAASAGPADAEM(Oxidation)EEIFDDASPGK+Incorrect Mono 1Da	40	snf2h	snf2h1	42.1	EFK(3270.4623)TTNR+Incorrect Mono 1Da	330	snf2h	snf2h_reca1	1.4	unique	27.6	2.1	adpbefx	2
881.889	5	1	Z20170518-32b_filtered	80.838	1	VGAGAPVYLAAVLEYLTAEILE(1489.8253)LAGNAAR	64	h2a	h2a_ap	100.8	VLK(2896.5698)QVHPDTGISSK	43	h2b	h2b	6.8	unique	14.2	2.1	adpbefx	2
678.578	4	1	Z20170518-33b_filtered	39.414	1	IDEAESLND(948.5029)EELEEK	830	snf2h	snf2h_hand	46.2	ISYGTNK(1743.7687)GK	945	snf2h	snf2h_slide	23.9	positional variants	23.2	2.1	adpbefx	2
832.874	5	0.8	Z20170518-31a_filtered	80.657	1	VGAGAPVYLAAVLEYLTAE(1244.7493)ILELAGNAAR	61	h2a	h2a_ap	97.7	K(2896.5698)EVKIYVGLSK	410	snf2h	snf2h_reca2	9.5	positional variants	15.5	2.1	adpbefx	6.3
832.874	5	0.8	Z20170518-31a_filtered	80.657	1	VGAGAPVYLAAVLEYLTAE(1244.7493)ILELAGNAAR	61	h2a	h2a_ap	97.7	KEVK(2896.5698)IYVGLSK	413	snf2h	snf2h_reca2	9.5	positional variants	15.5	2.1	adpbefx	2.3
826.415	6	0.6	Z20170518-31a_filtered	59.608	1	ANRFEYLLKQTE(2089.9262)LFAHFIQPAAQK	102	snf2h	snf2h_auton	34.4	EIQEPDPTYEEK(2844.5075)MQTDR	85	snf2h	snf2h_auton	24.2	positional variants	30.1	2.1	adpbefx	1.6
1185.32	4	0	Z20170518-31a_filtered	55.713	1	NFTMDTESSVYNFE(2434.3009)GEDYR	717	snf2h	snf2h4	31.5	QTELFAHFIQPAAQK(2284.9219)TPTSPLK	114	snf2h	snf2h_auton	17.8	unique	25.6	2.1	adpbefx	5.8
900.23	4	1.1	Z20170518-33b_filtered	58.386	1	Q(Gln->pyro-Glu)TELFAHFIQPAAQK(1161.6030)TPTSPLK	114	snf2h	snf2h_auton	29.6	ISGLIYE(2417.2743)ETR	52	h4	h4	18.4	positional variants	25.3	2.1	adpbefx	2.5
900.23	4	1.1	Z20170518-33b_filtered	58.386	1	Q(Gln->pyro-Glu)TELFAHFIQPAAQK(1161.6030)TPTSPLK	114	snf2h	snf2h_auton	29.6	ISGLIYEE(2417.2743)TR	53	h4	h4	18.4	positional variants	25.3	2.1	adpbefx	1.5
619.567	4	0.3	Z20170518-33b_filtered	42.212	1	ESE(741.4385)ITDEDIDGILER	670	snf2h	snf2h_negc	72.8	IK(1714.7897)KDEK	130	snf2h	snf2h_auton	6.5	unique	13.6	2.1	adpbefx	1.3
848.883	4	1.4	Z20170518-33b_filtered	48.656	1	NFTMD(1088.5648)TESSVYNFEGEDYR	708	snf2h	snf2h4	63.1	LSK(2284.9219)MGESSLR	696	snf2h	snf2h_negc	13.2	positional variants	18.7	2	adpbefx	1.5
810.216	5	-0.6	Z20170518-31a_filtered	60.376	1	QTELFAHFIQPAAQK(1593.7320)TPTSPLK	114	snf2h	snf2h_auton	29.6	VLD(2434.3009)ILEDYC(Carbamidomethyl)MWR	515	snf2h	snf2h_reca2	20.4	unique	28.9	2	adpbefx	1.5
758.391	4	0.3	Z20170518-33b_filtered	59.207	1	TPEEVIEYSAVFWE(1175.6485)R	891	snf2h	snf2h_sant	36	IYVGLSK(1835.8730)MQR	420	snf2h	snf2h_reca2	16.2	unique	21.1	2	adpbefx	1.5
684.186	6	2	Z20170518-31a_filtered	68.455	1	FQSSAVMALQEASEAYLVALFE(660.3443)DTNLAAIHAK+Incorrect Mono 1Da	105	h3	h3	36.9	K(3419.7071)TESSK+Incorrect Mono 1Da	119	h2a	h2a_ctail	-0.3	positional variants	38.8	2	adpbefx	3.5
714.806	5	-0.3	Z20170518-33b_filtered	80.1	1	VGAGAPVYLAAVLEYLTAE(653.4085)ILELAGNAAR+Incorrect Mono 1Da	61	h2a	h2a_ap	38.5	RGGVK(2896.5698)R+Incorrect Mono 1Da	44	h4	h4	-0.8	unique	33.5	2	adpbefx	3.5
996.001	4	1	Z20170518-31a_filtered	56.319	1	APRPPK(1714.7897)QPNVQDFQFFPPR	769	snf2h	snf2h_hand	28.1	ESEITD(2247.1701)EDIDGILER	673	snf2h	snf2h_negc	25.9	positional variants	29.9	2	adpbefx	1.8
684.186	6	2	Z20170518-31a_filtered	68.455	1	FQSSAVMALQEASEAYLVALFED(660.3443)TNLAAIHAK+Incorrect Mono 1Da	106	h3	h3	36.9	K(3419.7071)TESSK+Incorrect Mono 1Da	119	h2a	h2a_ctail	-0.3	positional variants	38.8	2	adpbefx	3
663.538	5	0.7	Z20170518-31a_filtered	39.167	1	TEQE(1546.8766)EDEELLTESSK	151	snf2h	snf2h_auton	38.5	TPTSPLK(1747.7636)MKPGRPR	121	snf2h	snf2h_auton	18.2	positional variants	25.2	2	adpbefx	2.4
616.65	3	-0.2	Z20170518-33a_filtered	32.193	1	SVC(Carbamidomethyl)LIGDK(542.2700)EQR+Incorrect Mono 1Da	266	snf2h	snf2h_reca1	4.7	EVE(1285.6449)GK+Incorrect Mono 1Da	875	snf2h	snf2h_sant	-0.1	positional variants	33.6	2	adpbefx	2.5
393.621	5	-0.2	Z20170518-33a_filtered	20.762	1	RGPKPSTQK(809.4032)R	1036	snf2h	snf2h5	28	HAVSE(1135.6574)GTK	110	h2b	h2b_ap	17.2	unique	22.9	2	adpbefx	10
614.052	4	0.4	Z20170518-33a_filtered	33.485	1	SVC(Carbamidomethyl)LIGDK(1148.5210)EQR	266	snf2h	snf2h_reca1	29.6	LDGQTPHDE(1285.6449)R	539	snf2h	snf2h_reca2	19.9	unique	24.6	2	adpbefx	3.5
716.568	4	-2	Z20170518-33a_filtered	43.904	1	NFTMDTESSVYNFE(558.3126)GEDYR+Incorrect Mono 1Da	717	snf2h	snf2h4	10.4	K(2284.9219)STGGK+Incorrect Mono 1Da	9	h3	h3_tail	7	unique	33.8	2	adpbefx	2
914.456	4	-0.9	Z20170518-31a_filtered	44.088	1	TEQEED(1887.0214)EELLTESSK+Incorrect Mono 1Da	153	snf2h	snf2h_auton	23.6	IK(1747.7636)KDEKQNLLSVGDYR+Incorrect Mono 1Da	130	snf2h	snf2h_auton	19.6	positional variants	29.5	2	adpbefx	4.5
892.635	5	-0.1	Z20170518-31a_filtered	41.365	1	1096.5665-GSM(Oxidation)SSAAEPPPPPPPESAPSKPAASIASGGSNSSNK	1	snf2h	snf2h1	88	YLVID(3343.5627)EAHR	310	snf2h	snf2h_reca1	-0.1	positional variants	15.5	2	adpbefx	2.5
690.595	4	0.6	Z20170518-33b_filtered	35.013	1	RTEQEEDE(836.4756)ELLTESSK	154	snf2h	snf2h_auton	34	VSEPK(1903.8647)APK	760	snf2h	snf2h_hand	22.3	unique	26.1	2	adpbefx	2.1
524.097	5	-1.7	Z20170518-33b_filtered	55.497	1	QK(872.5008)IAFTEWIEPPKR+Incorrect Mono 1Da	726	snf2h	snf2h4	52.6	LFELLE(1723.9410)K+Incorrect Mono 1Da	788	snf2h	snf2h_hand	4.1	unique	20.3	2	adpbefx	4
772.99	5	-0.4	Z20170518-31a_filtered	59.659	1	APRPPK(1593.7320)QPNVQDFQFFPPR+Incorrect Mono 1Da	769	snf2h	snf2h_hand	32.2	VLD(2247.1701)ILEDYC(Carbamidomethyl)MWR+Incorrect Mono 1Da	515	snf2h	snf2h_reca2	19.4	positional variants	27.4	2	adpbefx	1.3
1044.75	4	-3.1	Z20170518-31a_filtered	41.644	1	829.4116-GSMSSAAEPPPPPPPESAPSKPAASIASGGSNSSNK	1	snf2h	snf2h1	64	TAME(3327.5677)LQR	998	snf2h	snf2h_slide	2.6	unique	18.4	2	adpbefx	4
547.99	3	-0.2	Z20170518-33a_filtered	40.178	1	LFELLE(750.4388)K	788	snf2h	snf2h_hand	25.6	AK(872.5008)SAPAPK	2	h2b	h2b_tail	22.3	unique	27.8	2	adpbefx	1.5
1157.04	4	-0.4	Z20170518-31a_filtered	57.335	1	GGPEGVAAQAVASAASAGPAD(1334.6619)AEM(Oxidation)EEIFDDASPGK+Incorrect Mono 1Da	57	snf2h	snf2h1	60.1	DFNQFIK(3270.4623)ANEK+Incorrect Mono 1Da	857	snf2h	snf2h_sant	0.9	unique	21.8	2	adpbefx	3
462.438	5	1.1	Z20170518-33b_filtered	32.365	1	LDGQTPHD(1140.6192)ER	538	snf2h	snf2h_reca2	29.1	YK(1148.5210)APFHQLR	931	snf2h	snf2h_slide	23.8	unique	25.4	2	adpbefx	2
616.65	3	-0.2	Z20170518-33a_filtered	32.193	1	SVC(Carbamidomethyl)LIGDK(542.2700)EQR+Incorrect Mono 1Da	266	snf2h	snf2h_reca1	4.7	E(1285.6449)VEGK+Incorrect Mono 1Da	873	snf2h	snf2h_sant	-0.3	positional variants	33.4	2	adpbefx	2.5
658.582	4	-0.8	Z20170518-33a_filtered	47.469	1	EK(1052.4815)LLTQGFTNWNK	838	snf2h	snf2h_hand	51.8	FE(1559.8096)DSPSYVK	171	snf2h	snf2h2	16.4	unique	20.5	2	adpbefx	2
809.396	3	0.4	Z20170518-33a_filtered	35.964	1	EIQE(948.5029)PDPTYEEK	77	snf2h	snf2h1	32	ISYGTNK(1458.6515)GK	945	snf2h	snf2h_slide	21.1	unique	26.5	2	adpbefx	1.3
829.169	4	-0.7	Z20170518-33b_filtered	38.636	1	TEQEEDE(1546.8766)ELLTESSK	154	snf2h	snf2h_auton	53.5	TPTSPLKMK(1747.7636)PGRPR	123	snf2h	snf2h_auton	24.2	positional variants	24.9	2	adpbefx	7.4
863.203	4	-0.3	Z20170518-33b_filtered	61.64	1	FEYLLK(926.4458)QTELFAHFIQPAAQK+Incorrect Mono 1Da	99	snf2h	snf2h_auton	56.9	DDIE(2503.3264)NIAR+Incorrect Mono 1Da	868	snf2h	snf2h_sant	3.9	unique	21.8	2	adpbefx	3.7
549.314	3	0.4	Z20170518-33a_filtered	39.22	1	LFELLE(754.4086)K	788	snf2h	snf2h_hand	26.5	STGGK(872.5008)APR	14	h3	h3_tail	19.1	unique	27.6	2	adpbefx	2
618.533	5	-0.4	Z20170518-31a_filtered	52.468	1	APRPPK(821.4436)QPNVQDFQFFPPR+Incorrect Mono 1Da	769	snf2h	snf2h_hand	20.6	E(2247.1701)ILFYR+Incorrect Mono 1Da	790	snf2h	snf2h_hand	8.9	unique	27.7	2	adpbefx	8
791.388	3	-0.5	Z20170518-33a_filtered	48.737	1	DFNQFIK(1018.4720)ANEK	857	snf2h	snf2h_sant	44.3	E(1334.6619)NVYDELR	969	snf2h	snf2h_slide	15.4	unique	23.9	2	adpbefx	2
508.79	4	0.6	Z20170518-33a_filtered	46.248	1	LFELLE(1140.6192)K	788	snf2h	snf2h_hand	35.5	YK(872.5008)APFHQLR	931	snf2h	snf2h_slide	20.6	unique	28.5	2	adpbefx	4
772.99	5	-0.4	Z20170518-31a_filtered	59.659	1	APRPPK(1593.7320)QPNVQDFQFFPPR+Incorrect Mono 1Da	769	snf2h	snf2h_hand	32.2	VLDILE(2247.1701)DYC(Carbamidomethyl)MWR+Incorrect Mono 1Da	518	snf2h	snf2h_reca2	17.6	positional variants	25.7	2	adpbefx	3.8
474.257	5	-1.6	Z20170518-33a_filtered	47.096	1	TLQTISLLGYMK(542.2700)HYR+Incorrect Mono 1Da	225	snf2h	snf2h_reca1	14.7	E(1804.9658)VEGK+Incorrect Mono 1Da	873	snf2h	snf2h_sant	2.8	unique	31.1	2	adpbefx	5.5
657.008	3	-0.8	Z20170518-33a_filtered	32.01	1	K(1052.4815)SAPATGGVK+Incorrect Mono 1Da	27	h3	h3_tail	16.1	FE(896.5080)DSPSYVK+Incorrect Mono 1Da	171	snf2h	snf2h2	10.2	unique	28.1	2	adpbefx	2.5
673.832	4	0.3	Z20170518-33a_filtered	63.552	1	VLDILED(1079.5553)YC(Carbamidomethyl)MWR	519	snf2h	snf2h_reca2	46.9	FDWFLK(1593.7320)SR	992	snf2h	snf2h_slide	15.4	unique	20.9	2	adpbefx	2.5
757.641	4	-1.2	Z20170518-33b_filtered	47.084	1	APRPPK(760.3538)QPNVQDFQFFPPR+Incorrect Mono 1Da	769	snf2h	snf2h_hand	26.2	MGE(2247.1701)SSLR+Incorrect Mono 1Da	699	snf2h	snf2h_negc	1.1	unique	29.6	2	adpbefx	4
822.737	3	0	Z20170518-33a_filtered	51.917	1	ESE(731.3867)ITDEDIDGILER+Incorrect Mono 1Da	670	snf2h	snf2h_negc	28.9	K(1714.7897)FNWR+Incorrect Mono 1Da	301	snf2h	snf2h_reca1	4.8	unique	24.4	2	adpbefx	2
863.948	4	0.3	Z20170518-31a_filtered	60.895	1	Q(Gln->pyro-Glu)TELFAHFIQPAAQK(1016.4783)TPTSPLK	114	snf2h	snf2h_auton	55.7	D(2417.2743)EMLQMIR	650	snf2h	snf2h_negc	12.7	positional variants	20.8	2	adpbefx	3
650.572	4	0.9	Z20170518-33b_filtered	38.242	1	IDEAE(836.4756)SLNDEELEEK	826	snf2h	snf2h_hand	55.2	VSEPK(1743.7687)APK	760	snf2h	snf2h_hand	16.1	unique	20.8	2	adpbefx	4
638.598	4	0.3	Z20170518-33b_filtered	38.298	1	QTE(822.4647)LFAHFIQPAAQK	102	snf2h	snf2h_auton	63.8	MK(1709.8889)PGRPR	123	snf2h	snf2h_auton	7.1	unique	15.6	2	adpbefx	10
549.054	4	-1.2	Z20170518-33a_filtered	39.575	1	SK(1261.6415)LSEIVR	321	snf2h	snf2h_reca1	27.4	NPE(912.5393)LPNAAQAQK	807	snf2h	snf2h_hand	19.9	unique	26.5	2	adpbefx	3
581.487	5	0.8	Z20170518-33b_filtered	42.764	1	IDEAESLNDEE(1140.6192)LEEK	832	snf2h	snf2h_hand	66.5	YK(1743.7687)APFHQLR	931	snf2h	snf2h_slide	13.8	unique	22.3	2	adpbefx	1.3
586.329	3	-0.7	Z20170518-33a_filtered	31.172	1	K(841.4480)SAPATGGVK	27	h3	h3_tail	26.4	IMAQIE(896.5080)R	907	snf2h	snf2h_slide	20.7	unique	28.5	2	adpbefx	3
707.025	6	-0.9	Z20170518-31a_filtered	53.511	1	HGATHVFASK(1467.7874)ESEITDEDIDGILER	667	snf2h	snf2h_negc	44.5	IAFTE(2750.3148)WIEPPKR	731	snf2h	snf2h4	20.8	unique	25.7	2	adpbefx	3.5
967.034	4	0.5	Z20170518-33b_filtered	83.063	1	VGAGAPVYLAAVLEYLTAE(949.5233)ILELAGNAAR	61	h2a	h2a_ap	100.5	AVTK(2896.5698)YTSAK	117	h2b	h2b_ap	4.8	unique	13.4	2	adpbefx	5.5
529.958	3	0	Z20170518-33a_filtered	22.813	1	KGNYAE(750.4388)R	41	h2a	h2a	15.2	818.4035-AKSAPAPK	1	h2b	h2b_tail	11.9	unique	24.3	1.9	adpbefx	2.5
953.779	4	-0.1	Z20170518-31a_filtered	82.253	1	VGAGAPVYLAAVLEYLTAE(896.5080)ILELAGNAAR	61	h2a	h2a_ap	111.1	K(2896.5698)SAPATGGVK	27	h3	h3_tail	6.3	unique	12.4	1.9	adpbefx	3
806.735	3	-0.2	Z20170518-33a_filtered	41.281	1	Q(Gln->pyro-Glu)DSINAYNE(854.4974)PNSTK	549	snf2h	snf2h_reca2	40.9	ALDTK(1544.6743)IGR	926	snf2h	snf2h_slide	15.8	unique	23.9	1.9	adpbefx	2
606.985	3	-0.2	Z20170518-33a_filtered	43.534	1	K(872.5008)MDGAPDGR	1038	snf2h	snf2h5	25.5	LFELLE(927.4232)K	788	snf2h	snf2h_hand	19.2	unique	27.7	1.9	adpbefx	2
730.725	3	1.1	Z20170518-33a_filtered	52.721	1	K(872.5008)ANYAVDAYFR	741	snf2h	snf2h_hand	33.7	LFELLE(1298.6408)K	788	snf2h	snf2h_hand	17.1	unique	23.4	1.9	adpbefx	4.5
554.903	5	0.9	Z20170518-33b_filtered	36.024	1	NPE(1489.8253)LPNAAQAQK	807	snf2h	snf2h_hand	36.7	VLK(1261.6415)QVHPDTGISSK	43	h2b	h2b	21.4	unique	21.8	1.9	adpbefx	2
671.345	4	-1.5	Z20170518-33a_filtered	46.157	1	LLTQGFTNWNK(1204.5724)R	849	snf2h	snf2h_sant	45	FITD(1458.7732)NTVEER	612	snf2h	snf2h_reca2	19.4	unique	22.2	1.9	adpbefx	3
581.717	5	0.8	Z20170518-33b_filtered	49.218	1	QTE(1175.6485)LFAHFIQPAAQK	102	snf2h	snf2h_auton	33.2	IYVGLSK(1709.8889)MQR	420	snf2h	snf2h_reca2	19.3	unique	27.5	1.9	adpbefx	3
779.717	3	0.7	Z20170518-33a_filtered	47.427	1	K(1018.4720)ANYAVDAYFR+Incorrect Mono 1Da	741	snf2h	snf2h_hand	25.9	E(1298.6408)NVYDELR+Incorrect Mono 1Da	969	snf2h	snf2h_slide	13.2	unique	26.5	1.9	adpbefx	2.5
1074.32	5	1.6	Z20170518-31a_filtered	54.797	1	NPELPNAAQAQKEEQLK(1714.7897)IDEAESLNDEELEEK+Incorrect Mono 1Da	821	snf2h	snf2h_hand	35.8	E(3632.7330)SEITDEDIDGILER+Incorrect Mono 1Da	668	snf2h	snf2h_negc	21.1	positional variants	27.9	1.9	adpbefx	2
694.757	5	-1.2	Z20170518-31a_filtered	36.488	1	RTEQEED(1546.8766)EELLTESSK	153	snf2h	snf2h_auton	38.3	TPTSPLK(1903.8647)MKPGRPR	121	snf2h	snf2h_auton	22.3	positional variants	23.7	1.9	adpbefx	3.9
795.404	5	-0.3	Z20170518-31a_filtered	57.083	1	LVDQNLNK(1714.7897)IGKDEMLQMIR	646	snf2h	snf2h_negc	28.9	ESEITD(2239.1817)EDIDGILER	673	snf2h	snf2h_negc	28.9	positional variants	28.1	1.9	adpbefx	1.8
624.81	4	-0.1	Z20170518-33a_filtered	42.362	1	LLTQGFTNWNK(1018.4277)R	849	snf2h	snf2h_sant	38.1	E(1458.7732)NM(Oxidation)ELEEK	1013	snf2h	snf2h_slide	14.6	unique	22.8	1.9	adpbefx	3
1010.27	4	-0.1	Z20170518-33b_filtered	61.351	1	Q(Gln->pyro-Glu)PNVQD(2434.3009)FQFFPPR+Incorrect Mono 1Da	775	snf2h	snf2h_hand	20.9	QTELFAHFIQPAAQK(1583.7521)TPTSPLK+Incorrect Mono 1Da	114	snf2h	snf2h_auton	17.4	unique	25.4	1.9	adpbefx	3
679.829	4	2.1	Z20170518-33b_filtered	38.401	1	TEQE(948.5029)EDEELLTESSK+Incorrect Mono 1Da	151	snf2h	snf2h_auton	32.4	ISYGTNK(1747.7636)GK+Incorrect Mono 1Da	945	snf2h	snf2h_slide	2	positional variants	27.5	1.9	adpbefx	3.4
659.11	4	0.8	Z20170518-33b_filtered	50.462	1	TLQTISLLGYM(Oxidation)K(793.4374)HYR	225	snf2h	snf2h_reca1	63.6	FE(1820.9607)YLLK	95	snf2h	snf2h_auton	10.2	unique	17.8	1.9	adpbefx	6
660.341	3	0.5	Z20170518-33a_filtered	32.983	1	K(660.3443)ANYAVDAYFR+Incorrect Mono 1Da	741	snf2h	snf2h_hand	20.4	KTE(1298.6408)SSK+Incorrect Mono 1Da	121	h2a	h2a_ctail	-0.4	unique	26.1	1.9	adpbefx	1.5
663.519	6	0.5	Z20170518-31a_filtered	52.295	1	APRPPK(1709.8889)QPNVQDFQFFPPR	769	snf2h	snf2h_hand	29.6	QTE(2247.1701)LFAHFIQPAAQK	102	snf2h	snf2h_auton	23.7	unique	28.4	1.9	adpbefx	3
545.567	4	0.7	Z20170518-33b_filtered	37.174	1	SAPATGGVK(872.5008)KPHR+Incorrect Mono 1Da	36	h3	h3_tail	13.8	LFE(1286.7208)LLEK+Incorrect Mono 1Da	785	snf2h	snf2h_hand	2.1	unique	31.6	1.9	adpbefx	3.5
868.099	3	-0.2	Z20170518-33a_filtered	38.435	1	IDEAE(839.4977)SLNDEELEEK	826	snf2h	snf2h_hand	47.4	QLATK(1743.7687)AAR	23	h3	h3_tail	14.2	positional variants	20.5	1.9	adpbefx	5
535.557	4	-0.9	Z20170518-33a_filtered	38.095	1	RC(Carbamidomethyl)NTLITLIE(750.4388)R	1011	snf2h	snf2h_slide	32.2	1369.7500-AKSAPAPK	1	h2b	h2b_tail	11.1	positional variants	25	1.9	adpbefx	1.5
550.64	3	-1	Z20170518-33a_filtered	23.929	1	STE(818.4134)LLIR	59	h3	h3	23.6	TESSK(812.4756)SAK	124	h2a	h2a_ctail	20.2	unique	27.8	1.9	adpbefx	2
889.434	3	-0.2	Z20170518-33b_filtered	47.447	1	SVC(Carbamidomethyl)LIGDK(1360.6234)EQR+Incorrect Mono 1Da	266	snf2h	snf2h_reca1	7.2	STLHNWMSE(1285.6449)FK+Incorrect Mono 1Da	249	snf2h	snf2h_reca1	2.1	unique	31.5	1.9	adpbefx	3
596.681	3	0.3	Z20170518-33b_filtered	40.313	1	K(872.5008)SAPATGGVK	27	h3	h3_tail	29.4	LFE(896.5080)LLEK	785	snf2h	snf2h_hand	17.4	unique	22.8	1.9	adpbefx	2
510.627	3	0	Z20170518-35_filtered	30.947	1	GLGK(841.4480)GGAK+Incorrect Mono 1Da	12	h4	h4_tail	2	IMAQIE(668.3970)R+Incorrect Mono 1Da	907	snf2h	snf2h_slide	0.6	unique	33.9	1.9	adpbefx	4
600.082	4	-1	Z20170518-33b_filtered	36.001	1	TPTSPLK(831.4127)MKPGRPR	121	snf2h	snf2h_auton	31.4	EIAQD(1546.8766)FK	77	h3	h3	16.9	unique	25.1	1.9	adpbefx	1.5
764.38	4	-2.2	Z20170518-33b_filtered	33.122	1	TEQEEDE(1286.7208)ELLTESSK+Incorrect Mono 1Da	154	snf2h	snf2h_auton	8.3	SAPATGGVK(1747.7636)KPHR+Incorrect Mono 1Da	36	h3	h3_tail	4	positional variants	30.5	1.9	adpbefx	1.1
637.328	4	1.1	Z20170518-33b_filtered	42.912	1	LGFDKENVYDE(948.5029)LR	974	snf2h	snf2h_slide	37.9	ISYGTNK(1578.7678)GK	945	snf2h	snf2h_slide	22.9	unique	25.9	1.9	adpbefx	2.5
663.696	6	-0.1	Z20170518-31a_filtered	57.084	1	IVERAEM(Oxidation)K(1606.8104)LRLDSIVIQQGR	626	snf2h	snf2h_reca2	33	VFRFITDNTVEE(2351.3107)R	617	snf2h	snf2h_reca2	23.4	positional variants	26.9	1.9	adpbefx	40.2
670.379	6	1.6	Z20170518-33b_filtered	57.597	1	TIGYK(1822.0393)VPRNPELPNAAQAQK	801	snf2h	snf2h_hand	55.1	LFELLE(2176.1753)KEILFYRK	788	snf2h	snf2h_hand	24.4	positional variants	22.9	1.9	adpbefx	7.6
812.737	3	6.4	Z20170518-33b_filtered	36.843	1	TEQEED(668.3970)EELLTESSK+Incorrect Mono 1Da	153	snf2h	snf2h_auton	29.6	GLGK(1747.7636)GGAK+Incorrect Mono 1Da	12	h4	h4_tail	0.6	positional variants	25.6	1.9	adpbefx	1.5
868.875	5	-0.3	Z20170518-31a_filtered	71.76	1	Q(Gln->pyro-Glu)PNVQDFQFFPPRLFELLE(1864.0723)K+Incorrect Mono 1Da	788	snf2h	snf2h_hand	15.9	EILFYRK(2456.2529)TIGYKVPR+Incorrect Mono 1Da	796	snf2h	snf2h_hand	3.6	positional variants	30.4	1.9	adpbefx	12.5
870.203	4	-1.7	Z20170518-31a_filtered	55.613	1	LLLPGELAK(1714.7897)HAVSEGTK	105	h2b	h2b_ap	29.9	E(1743.9883)SEITDEDIDGILER	668	snf2h	snf2h_negc	22.6	positional variants	29.7	1.9	adpbefx	2.3
870.203	4	-1.7	Z20170518-31a_filtered	55.613	1	LLLPGELAK(1714.7897)HAVSEGTK	105	h2b	h2b_ap	29.9	ESE(1743.9883)ITDEDIDGILER	670	snf2h	snf2h_negc	22.6	positional variants	29.7	1.9	adpbefx	2
1160.87	3	-0.8	Z20170518-33b_filtered	53.603	1	NFTMDTESSVYNFE(1175.6485)GEDYR+Incorrect Mono 1Da	717	snf2h	snf2h4	9.3	IYVGLSK(2284.9219)MQR+Incorrect Mono 1Da	420	snf2h	snf2h_reca2	2.2	positional variants	29.5	1.9	adpbefx	1.7
690.595	4	0.6	Z20170518-33b_filtered	35.812	1	RTEQE(836.4756)EDEELLTESSK	151	snf2h	snf2h_auton	36.8	VSEPK(1903.8647)APK	760	snf2h	snf2h_hand	21.1	positional variants	25.2	1.9	adpbefx	1.3
549.468	6	0.4	Z20170518-33b_filtered	55.638	1	TLQTISLLGYMK(1467.7874)HYR	225	snf2h	snf2h_reca1	32.9	IAFTE(1804.9658)WIEPPKR	731	snf2h	snf2h4	22.7	unique	28.4	1.9	adpbefx	7
893.748	4	-0.5	Z20170518-33b_filtered	83.332	1	VGAGAPVYLAAVLEYLTAE(656.3857)ILELAGNAAR	61	h2a	h2a_ap	103.8	K(2896.5698)ALDTK	921	snf2h	snf2h_slide	3.9	unique	12.4	1.9	adpbefx	7
690.595	4	0.6	Z20170518-33b_filtered	35.812	1	RTEQEE(836.4756)DEELLTESSK	152	snf2h	snf2h_auton	36.8	VSEPK(1903.8647)APK	760	snf2h	snf2h_hand	21.1	positional variants	25.2	1.9	adpbefx	1.6
659.304	4	0.1	Z20170518-33a_filtered	46.633	1	LGFDK(1036.4098)ENVYDELR	968	snf2h	snf2h_slide	29.9	NYTEEE(1578.7678)DR	953	snf2h	snf2h_slide	22.1	unique	27.1	1.9	adpbefx	1.5
1160.87	3	-0.8	Z20170518-33b_filtered	53.603	1	NFTMDTESSVYNFEGE(1175.6485)DYR+Incorrect Mono 1Da	719	snf2h	snf2h4	8.7	IYVGLSK(2284.9219)MQR+Incorrect Mono 1Da	420	snf2h	snf2h_reca2	2.2	positional variants	29.5	1.9	adpbefx	1.7
709.362	4	0.1	Z20170518-33b_filtered	43.53	1	NPELPNAAQAQK(926.4458)EEQLK	816	snf2h	snf2h_hand	65.2	D(1888.9643)DIENIAR	865	snf2h	snf2h_sant	11.1	positional variants	19.1	1.9	adpbefx	1.7
465.054	5	0.1	Z20170518-33b_filtered	42.481	1	ISGLIYE(1140.6192)ETR	52	h4	h4	36.8	YK(1161.6030)APFHQLR	931	snf2h	snf2h_slide	22.6	unique	28	1.9	adpbefx	1.5
782.607	4	-0.2	Z20170518-33b_filtered	43.629	1	NFTMDTE(822.4647)SSVYNFEGEDYR+Incorrect Mono 1Da	710	snf2h	snf2h4	40	MK(2284.9219)PGRPR+Incorrect Mono 1Da	123	snf2h	snf2h_auton	-0.1	unique	24.9	1.9	adpbefx	2
646.857	4	0.1	Z20170518-33b_filtered	46.056	1	QTE(854.4974)LFAHFIQPAAQK+Incorrect Mono 1Da	102	snf2h	snf2h_auton	11.5	ALDTK(1709.8889)IGR+Incorrect Mono 1Da	926	snf2h	snf2h_slide	9.9	unique	31	1.9	adpbefx	2
939.022	4	-0.2	Z20170518-33b_filtered	83.029	1	VGAGAPVYLAAVLEYLTAE(836.4756)ILELAGNAAR+Incorrect Mono 1Da	61	h2a	h2a_ap	53.1	VSEPK(2896.5698)APK+Incorrect Mono 1Da	760	snf2h	snf2h_hand	-2.3	unique	38.2	1.9	adpbefx	4
804.875	4	0.3	Z20170518-33b_filtered	53.149	1	NFTMDTESSVYNFE(912.5393)GEDYR	717	snf2h	snf2h4	71.3	SK(2284.9219)LSEIVR	321	snf2h	snf2h_reca1	9.2	unique	17.1	1.9	adpbefx	2.8
663.696	6	-0.1	Z20170518-31a_filtered	57.084	1	AEM(Oxidation)K(2104.1065)LRLDSIVIQQGR	626	snf2h	snf2h_reca2	32.8	VFRFITDNTVEERIVE(1854.0146)R	621	snf2h	snf2h_reca2	23.7	positional variants	26.6	1.9	adpbefx	22.4
709.716	3	0.3	Z20170518-33a_filtered	53.541	1	IGK(793.4374)DEMLQMIR	649	snf2h	snf2h_negc	43.4	FE(1314.6788)YLLK	95	snf2h	snf2h_auton	12.1	unique	20	1.9	adpbefx	3.5
848.883	4	1.4	Z20170518-33b_filtered	48.656	1	NFTMDTE(1088.5648)SSVYNFEGEDYR	710	snf2h	snf2h4	61.5	LSK(2284.9219)MGESSLR	696	snf2h	snf2h_negc	13.2	positional variants	17.1	1.9	adpbefx	4.5
626.326	5	1.4	Z20170518-33b_filtered	35.435	1	QDSINAYNE(1546.8766)PNSTK	549	snf2h	snf2h_reca2	44.5	TPTSPLK(1561.7009)MKPGRPR	121	snf2h	snf2h_auton	15.6	unique	22.8	1.9	adpbefx	4
501.027	4	0.3	Z20170518-33b_filtered	38.431	1	YK(841.4480)APFHQLR	931	snf2h	snf2h_slide	34	IMAQIE(1140.6192)R	907	snf2h	snf2h_slide	30.1	unique	26.9	1.9	adpbefx	9
643.327	4	1.3	Z20170518-33b_filtered	44.853	1	ESEITDED(836.4756)IDGILER	675	snf2h	snf2h_negc	47.9	VSEPK(1714.7897)APK	760	snf2h	snf2h_hand	14.5	unique	21.3	1.9	adpbefx	1.3
1009.68	5	2.4	Z20170518-31a_filtered	43.306	1	1697.7784-GSMSSAAEPPPPPPPESAPSKPAASIASGGSNSSNK	1	snf2h	snf2h1	75.3	Q(Gln->pyro-Glu)KEIQEPDPTYEE(3327.5677)K	84	snf2h	snf2h_auton	7.3	positional variants	16.8	1.9	adpbefx	1.1
1080.04	4	-0.9	Z20170518-31a_filtered	47.089	1	970.5600-GSMSSAAEPPPPPPPESAPSKPAASIASGGSNSSNK	1	snf2h	snf2h1	70.6	VFLE(3327.5677)NVIR	63	h4	h4	3.9	unique	19	1.8	adpbefx	2
660.838	4	-0.4	Z20170518-33a_filtered	60.454	1	FLIC(Carbamidomethyl)MLHK(1018.4720)LGFDK	963	snf2h	snf2h_slide	45.8	ENVYD(1602.8415)ELR	973	snf2h	snf2h_slide	18.3	positional variants	22.4	1.8	adpbefx	4
685.63	4	0.7	Z20170518-33b_filtered	65.337	1	LFELLEK(1026.5346)EILFYR	789	snf2h	snf2h_hand	41	D(1693.9443)IDILNSAGK	433	snf2h	snf2h_reca2	21.1	unique	27.5	1.8	adpbefx	1.5
1043.25	4	-0.3	Z20170518-33b_filtered	57.078	1	GGPEGVAAQAVASAASAGPADAEMEE(896.5080)IFDDASPGK	62	snf2h	snf2h1	96.8	K(3254.4674)SAPATGGVK	27	h3	h3_tail	3	unique	9.2	1.8	adpbefx	2.3
1140.54	4	-1.6	Z20170518-31a_filtered	59.229	1	GGPEGVAAQAVASAASAGPADAE(1285.6449)MEEIFDDASPGK	59	snf2h	snf2h1	90.3	SVC(Carbamidomethyl)LIGDK(3254.4674)EQR	266	snf2h	snf2h_reca1	4	positional variants	12.5	1.8	adpbefx	2.3
688.117	4	-1.1	Z20170518-33b_filtered	64.199	1	VLDILE(1136.6991)DYC(Carbamidomethyl)MWR	518	snf2h	snf2h_reca2	34.1	MVVLDK(1593.7320)LLPK	492	snf2h	snf2h_reca2	21.6	unique	26	1.8	adpbefx	3
885.448	4	-1.2	Z20170518-33b_filtered	59.03	1	TLQTISLLGYMK(1714.7897)HYR	225	snf2h	snf2h_reca1	41.6	E(1804.9658)SEITDEDIDGILER	668	snf2h	snf2h_negc	20.9	positional variants	25.4	1.8	adpbefx	1.3
885.448	4	-1.2	Z20170518-33b_filtered	59.03	1	TLQTISLLGYMK(1714.7897)HYR	225	snf2h	snf2h_reca1	41.6	ESE(1804.9658)ITDEDIDGILER	670	snf2h	snf2h_negc	20.9	positional variants	25.4	1.8	adpbefx	1.3
713.394	5	0.1	Z20170518-31a_filtered	51.53	1	QTELFAHFIQPAAQK(1109.6193)TPTSPLK	114	snf2h	snf2h_auton	30.8	LD(2434.3009)SIVIQQGR	630	snf2h	snf2h_reca2	17.2	unique	25.7	1.8	adpbefx	3
1217.92	3	-0.5	Z20170518-33b_filtered	44.798	1	NPELPNAAQAQK(1743.7687)EEQLK	816	snf2h	snf2h_hand	65.6	ID(1888.9643)EAESLNDEELEEK	823	snf2h	snf2h_hand	28.1	positional variants	12.4	1.8	adpbefx	4
1218.26	3	0.6	Z20170518-33b_filtered	44.825	1	IDE(1888.9643)AESLNDEELEEK+Incorrect Mono 1Da	824	snf2h	snf2h_hand	25.8	NPELPNAAQAQK(1743.7687)EEQLK+Incorrect Mono 1Da	816	snf2h	snf2h_hand	25.7	positional variants	10.5	1.8	adpbefx	5.5
846.4	5	-3.6	Z20170518-31a_filtered	49.51	1	HGATHVFASK(1458.6515)ESEITDEDIDGILER	667	snf2h	snf2h_negc	46.2	E(2750.3148)IQEPDPTYEEK	74	snf2h	snf2h1	15.1	positional variants	23.3	1.8	adpbefx	1.5
1120.03	4	-3.5	Z20170518-31a_filtered	42.714	1	1129.5074-GSMSSAAEPPPPPPPESAPSKPAASIASGGSNSSNK+Incorrect Mono 1Da	1	snf2h	snf2h1	86.3	C(Carbamidomethyl)NELQD(3327.5677)IEK+Incorrect Mono 1Da	898	snf2h	snf2h_slide	8.8	unique	14.2	1.8	adpbefx	2.8
782.854	4	-0.8	Z20170518-33b_filtered	45.033	1	NFTMDTESSVYNFE(823.4552)GEDYR+Incorrect Mono 1Da	717	snf2h	snf2h4	12.8	GPK(2284.9219)PSTQK+Incorrect Mono 1Da	1031	snf2h	snf2h5	0.2	unique	34.2	1.8	adpbefx	1.5
688.367	3	-0.9	Z20170518-33a_filtered	34.103	1	FITD(839.4977)NTVEER	612	snf2h	snf2h_reca2	33.6	QLATK(1204.5724)AAR	23	h3	h3_tail	20.7	unique	25.5	1.8	adpbefx	3
1107.55	4	1	Z20170518-31a_filtered	63.589	1	GGPEGVAAQAVASAASAGPADAEM(Oxidation)E(1136.6991)EIFDDASPGK+Incorrect Mono 1Da	61	snf2h	snf2h1	50.4	MVVLDK(3270.4623)LLPK+Incorrect Mono 1Da	492	snf2h	snf2h_reca2	1.4	positional variants	22.3	1.8	adpbefx	1.1
1209.33	4	-1.4	Z20170518-31a_filtered	62.554	1	GGPEGVAAQAVASAASAGPAD(1559.8096)AEMEEIFDDASPGK+Incorrect Mono 1Da	57	snf2h	snf2h1	64.5	EK(3254.4674)LLTQGFTNWNK+Incorrect Mono 1Da	838	snf2h	snf2h_hand	5	positional variants	16.9	1.8	adpbefx	1.2
712.39	3	-0.3	Z20170518-33a_filtered	36.815	1	NPE(854.4974)LPNAAQAQK	807	snf2h	snf2h_hand	33.3	ALDTK(1261.6415)IGR	926	snf2h	snf2h_slide	15.7	unique	23.6	1.8	adpbefx	2
1277.92	4	-0.1	Z20170518-31a_filtered	77.465	1	GLNWLISLYENGINGILADE(2417.2743)MGLGK+Incorrect Mono 1Da	208	snf2h	snf2h_reca1	27.1	Q(Gln->pyro-Glu)TELFAHFIQPAAQK(2671.3680)TPTSPLK+Incorrect Mono 1Da	114	snf2h	snf2h_auton	10.1	positional variants	23.2	1.8	adpbefx	2.7
1209.33	4	-1.4	Z20170518-31a_filtered	62.554	1	GGPEGVAAQAVASAASAGPADAE(1559.8096)MEEIFDDASPGK+Incorrect Mono 1Da	59	snf2h	snf2h1	64.5	EK(3254.4674)LLTQGFTNWNK+Incorrect Mono 1Da	838	snf2h	snf2h_hand	5	positional variants	16.9	1.8	adpbefx	1.2
1013.2	3	4.2	Z20170518-33b_filtered	60.305	1	DVLLPGE(669.4174)WDVC(Carbamidomethyl)VTSYEMLIK+Incorrect Mono 1Da	281	snf2h	snf2h_reca1	36	K(2348.1432)QLATK+Incorrect Mono 1Da	18	h3	h3_tail	6.5	unique	25	1.8	adpbefx	3
867.853	5	0.5	Z20170518-31a_filtered	68.071	1	FQSSAVMALQEASEAYLVALFE(896.5080)DTNLAAIHAK	105	h3	h3	106.5	K(3419.7071)SAPATGGVK	27	h3	h3_tail	5	unique	9.6	1.8	adpbefx	3
685.07	4	-0.4	Z20170518-33b_filtered	39.197	1	QK(1002.4328)EIQEPDPTYEEK+Incorrect Mono 1Da	73	snf2h	snf2h1	28.6	E(1714.8050)NMELEEK+Incorrect Mono 1Da	1013	snf2h	snf2h_slide	13.3	unique	23.2	1.8	adpbefx	3
615.311	3	-2.5	Z20170518-33a_filtered	37.993	1	ENMELE(822.4712)EK	1018	snf2h	snf2h5	28.1	Q(Gln->pyro-Glu)LATK(1002.4328)AAR	23	h3	h3_tail	18.2	unique	23.5	1.8	adpbefx	1.8
547.299	4	1.2	Z20170518-33b_filtered	42.825	1	D(1140.6192)IDILNSAGK	433	snf2h	snf2h_reca2	28.6	YK(1026.5346)APFHQLR	931	snf2h	snf2h_slide	19.8	unique	24.7	1.8	adpbefx	3
576.039	4	-2	Z20170518-33a_filtered	32.93	1	EIQEPDPTYE(822.4647)EK+Incorrect Mono 1Da	83	snf2h	snf2h1	3.9	MK(1458.6515)PGRPR+Incorrect Mono 1Da	123	snf2h	snf2h_auton	1.1	positional variants	36.8	1.8	adpbefx	5.8
576.039	4	-2	Z20170518-33a_filtered	32.93	1	EIQEPDPTYEE(822.4647)K+Incorrect Mono 1Da	84	snf2h	snf2h_auton	3.9	MK(1458.6515)PGRPR+Incorrect Mono 1Da	123	snf2h	snf2h_auton	1.1	positional variants	36.8	1.8	adpbefx	3.3
515.881	5	1.5	Z20170518-33b_filtered	47.289	1	IAFTEWIE(1088.5648)PPKR	734	snf2h	snf2h4	38.1	LSK(1467.7874)MGESSLR	696	snf2h	snf2h_negc	22.2	unique	24.5	1.8	adpbefx	3.5
709.415	5	0.5	Z20170518-32b_filtered	60.696	1	VTIAQGGVLPNIQSVLLPK(1467.7874)K	118	h2a	h2a_ctail	49.2	IAFTE(2056.2408)WIEPPKR	731	snf2h	snf2h4	16.2	unique	21.5	1.8	adpbefx	3
863.948	4	0.3	Z20170518-31a_filtered	60.895	1	Q(Gln->pyro-Glu)TELFAHFIQPAAQK(1016.4783)TPTSPLK	114	snf2h	snf2h_auton	55.7	DE(2417.2743)MLQMIR	651	snf2h	snf2h_negc	11.1	positional variants	19.2	1.8	adpbefx	3
614.012	3	-0.7	Z20170518-33a_filtered	42.889	1	LFELLE(948.5029)K	788	snf2h	snf2h_hand	27.6	ISYGTNK(872.5008)GK	945	snf2h	snf2h_slide	24.2	unique	25	1.8	adpbefx	2
732.688	3	0.7	Z20170518-33a_filtered	34.203	1	NYTE(1140.6192)EEDR	951	snf2h	snf2h_slide	27.1	YK(1036.4098)APFHQLR	931	snf2h	snf2h_slide	24.9	unique	28	1.8	adpbefx	7.5
639.308	4	-1.5	Z20170518-33a_filtered	48.026	1	STLHNWMSEFK(1018.4720)R	251	snf2h	snf2h_reca1	23.4	ENVYDE(1516.7245)LR	974	snf2h	snf2h_slide	19.2	unique	24.6	1.8	adpbefx	1.5
726.607	4	0.7	Z20170518-33b_filtered	42.434	1	IDEAESLND(1140.6192)EELEEK	830	snf2h	snf2h_hand	56.4	YK(1743.7687)APFHQLR	931	snf2h	snf2h_slide	13.8	unique	22.3	1.8	adpbefx	1.8
544.274	5	0.3	Z20170518-33b_filtered	43.7	1	KDEK(1052.4815)QNLLSVGDYR	134	snf2h	snf2h_auton	34.5	FE(1645.8424)DSPSYVK	171	snf2h	snf2h2	18.5	positional variants	27	1.8	adpbefx	3
452.046	5	-0.6	Z20170518-33a_filtered	39.212	1	YLVIDE(1140.6192)AHR	311	snf2h	snf2h_reca1	29.4	YK(1096.5665)APFHQLR	931	snf2h	snf2h_slide	25.6	unique	30.5	1.8	adpbefx	2
711.099	4	2.1	Z20170518-33b_filtered	48.81	1	IDEAESLNDEELEEK(821.4436)EK	836	snf2h	snf2h_hand	78.8	E(2000.9062)ILFYR	790	snf2h	snf2h_hand	4.5	unique	13	1.8	adpbefx	2
540.771	4	-0.7	Z20170518-33a_filtered	37.857	1	LSK(1052.4815)MGESSLR	696	snf2h	snf2h_negc	26.4	FED(1088.5648)SPSYVK	172	snf2h	snf2h2	20.4	unique	28.9	1.8	adpbefx	2
780.035	5	0.1	Z20170518-33b_filtered	78.348	1	VGAGAPVYLAAVLEYLTAE(979.5563)ILELAGNAAR+Incorrect Mono 1Da	61	h2a	h2a_ap	51.8	GPK(2896.5698)PSTQKR+Incorrect Mono 1Da	1031	snf2h	snf2h5	-0.8	unique	28.9	1.8	adpbefx	3.3
625.733	5	0.8	Z20170518-33b_filtered	46.794	1	APRPPK(857.4429)QPNVQDFQFFPPR+Incorrect Mono 1Da	769	snf2h	snf2h_hand	23.7	IM(Oxidation)AQIE(2247.1701)R+Incorrect Mono 1Da	907	snf2h	snf2h_slide	0	unique	27.8	1.8	adpbefx	10
899.827	5	-0.1	Z20170518-31a_filtered	38.44	1	1148.5210-GSMSSAAEPPPPPPPESAPSKPAASIASGGSNSSNK	1	snf2h	snf2h1	80.1	LDGQTPHDE(3327.5677)R	539	snf2h	snf2h_reca2	-3.1	unique	14.6	1.8	adpbefx	3.7
684.348	5	-0.6	Z20170518-31a_filtered	62.271	1	TLQTISLLGYMK(1593.7320)HYR	225	snf2h	snf2h_reca1	48	VLDILE(1804.9658)DYC(Carbamidomethyl)MWR	518	snf2h	snf2h_reca2	16.8	unique	21.5	1.7	adpbefx	9
883.67	4	0.7	Z20170518-33b_filtered	46.013	1	IDEAE(1767.8652)SLNDEELEEK+Incorrect Mono 1Da	826	snf2h	snf2h_hand	33.5	ANEK(1743.7687)WGRDDIENIAR+Incorrect Mono 1Da	861	snf2h	snf2h_sant	4.5	unique	28	1.7	adpbefx	3
1038.49	4	-0.4	Z20170518-33b_filtered	56.915	1	GGPEGVAAQAVASAASAGPAD(876.4454)AEMEEIFDDASPGK+Incorrect Mono 1Da	57	snf2h	snf2h1	71.1	EFK(3254.4674)TTNR+Incorrect Mono 1Da	330	snf2h	snf2h_reca1	-1.9	positional variants	30.5	1.7	adpbefx	2.7
508.286	5	0.7	Z20170518-33b_filtered	52.564	1	QK(793.4374)IAFTEWIEPPKR+Incorrect Mono 1Da	726	snf2h	snf2h4	48.4	FE(1723.9410)YLLK+Incorrect Mono 1Da	95	snf2h	snf2h_auton	5.3	unique	20.5	1.7	adpbefx	3
637.08	4	-0.3	Z20170518-33b_filtered	53.374	1	TPEEVIE(690.4065)YSAVFWER	884	snf2h	snf2h_sant	49.2	K(1835.8730)TIGYK	796	snf2h	snf2h_hand	7.5	unique	12.8	1.7	adpbefx	3
767.207	5	-0.6	Z20170518-31a_filtered	66.115	1	GLNWLISLYENGINGILADE(1140.6192)MGLGK+Incorrect Mono 1Da	208	snf2h	snf2h_reca1	57.6	YK(2671.3680)APFHQLR+Incorrect Mono 1Da	931	snf2h	snf2h_slide	13.8	positional variants	16.5	1.7	adpbefx	1.5
720.596	4	0.8	Z20170518-33b_filtered	42.831	1	K(1561.7009)ANYAVDAYFR	741	snf2h	snf2h_hand	29.2	QD(1298.6408)SINAYNEPNSTK	542	snf2h	snf2h_reca2	19.8	unique	26.3	1.7	adpbefx	2
477.469	5	0.7	Z20170518-33b_filtered	42.317	1	K(1467.7874)SAPATGGVK	27	h3	h3_tail	28.1	IAFTE(896.5080)WIEPPKR	731	snf2h	snf2h4	19.4	unique	25.4	1.7	adpbefx	3.5
790.628	4	0.9	Z20170518-33b_filtered	48.71	1	QDSINAYNE(1578.7678)PNSTK	549	snf2h	snf2h_reca2	29.6	LGFDK(1561.7009)ENVYDELR	968	snf2h	snf2h_slide	18.5	unique	26.1	1.7	adpbefx	2
469.743	4	0.2	Z20170518-33a_filtered	37.394	1	ALDTK(1002.4328)IGR	926	snf2h	snf2h_slide	27.1	E(854.4974)NMELEEK	1013	snf2h	snf2h_slide	20.3	unique	23.8	1.7	adpbefx	2
535.557	4	-0.9	Z20170518-33a_filtered	38.095	1	RC(Carbamidomethyl)NTLITLIE(750.4388)R	1011	snf2h	snf2h_slide	32.2	AK(1369.7500)SAPAPK	2	h2b	h2b_tail	15.5	positional variants	24	1.7	adpbefx	1.5
637.593	4	1.9	Z20170518-33b_filtered	58.883	1	C(Carbamidomethyl)NTLITLIE(1314.6788)R	1011	snf2h	snf2h_slide	33.6	IGK(1213.6489)DEMLQMIR	649	snf2h	snf2h_negc	21.4	unique	25.9	1.7	adpbefx	2
819.927	6	0.7	Z20170518-31a_filtered	76.424	1	DVLLPGEWDVC(Carbamidomethyl)VTSYEMLIK(1827.9533)EKSVFK+Incorrect Mono 1Da	294	snf2h	snf2h_reca1	9.4	KFNWRYLVID(3066.5446)EAHR+Incorrect Mono 1Da	310	snf2h	snf2h_reca1	5.3	positional variants	33.7	1.7	adpbefx	3.3
437.259	4	-0.5	Z20170518-33a_filtered	47.542	1	ALDTK(872.5008)IGR	926	snf2h	snf2h_slide	26.8	LFELLE(854.4974)K	788	snf2h	snf2h_hand	16.1	unique	24.6	1.7	adpbefx	2
614.327	3	0	Z20170518-33a_filtered	31.779	1	ISGLIYE(660.3443)ETR	52	h4	h4	52.9	K(1161.6030)TESSK	119	h2a	h2a_ctail	9.8	unique	15.5	1.7	adpbefx	3.8
788.046	3	-1.5	Z20170518-33a_filtered	33.392	1	Q(Gln->pyro-Glu)D(798.4348)SINAYNEPNSTK	542	snf2h	snf2h_reca2	44.8	LK(1544.6743)EQGSR	498	snf2h	snf2h_reca2	9.1	unique	15.4	1.7	adpbefx	2
648.067	4	0.8	Z20170518-33b_filtered	35.383	1	TE(822.4647)QEEDEELLTESSK	149	snf2h	snf2h_auton	77.7	MK(1747.7636)PGRPR	123	snf2h	snf2h_auton	0.1	unique	6.2	1.7	adpbefx	1.5
599.057	4	0.3	Z20170518-33b_filtered	39.958	1	E(914.5338)IQEPDPTYEEK+Incorrect Mono 1Da	74	snf2h	snf2h1	33.4	TIGYK(1458.6515)VPR+Incorrect Mono 1Da	801	snf2h	snf2h_hand	4.5	unique	24.1	1.7	adpbefx	3
833.052	5	-1.3	Z20170518-31a_filtered	79.451	1	VGAGAPVYLAAVLEYLTAE(1244.6441)ILELAGNAAR+Incorrect Mono 1Da	61	h2a	h2a_ap	45.6	K(2896.5698)ESYAIYVYK+Incorrect Mono 1Da	31	h2b	h2b_tail	1.8	unique	26.4	1.7	adpbefx	4.5
663.696	6	-0.1	Z20170518-31a_filtered	57.084	1	IVERAEM(Oxidation)K(1606.8104)LRLDSIVIQQGR	626	snf2h	snf2h_reca2	33	VFRFITDNTVE(2351.3107)ER	616	snf2h	snf2h_reca2	21.1	positional variants	25.2	1.7	adpbefx	16.3
728.12	4	1.2	Z20170518-33b_filtered	53.843	1	ESE(1175.6485)ITDEDIDGILER	670	snf2h	snf2h_negc	41.1	IYVGLSK(1714.7897)MQR	420	snf2h	snf2h_reca2	17.2	positional variants	21.9	1.7	adpbefx	2.3
1190.2	3	-1	Z20170518-33b_filtered	43.806	1	EIQEPDPTYEEK(1458.6515)MQTDR+Incorrect Mono 1Da	85	snf2h	snf2h_auton	21.6	E(2089.9262)IQEPDPTYEEK+Incorrect Mono 1Da	74	snf2h	snf2h1	3.9	positional variants	20.9	1.7	adpbefx	1.5
489.272	3	-0.1	Z20170518-35_filtered	23.127	1	K(550.2751)SAPATGGVK	27	h3	h3_tail	27.5	YTSAK-896.5080	122	h2b	h2b_ap	-2.8	unique	22.5	1.7	adpbefx	2
655.328	4	0.6	Z20170518-33a_filtered	43.157	1	ALDTK(1743.7687)IGR+Incorrect Mono 1Da	926	snf2h	snf2h_slide	4.7	IDEAESLNDEELEE(854.4974)K+Incorrect Mono 1Da	835	snf2h	snf2h_hand	3.4	positional variants	30.8	1.7	adpbefx	1.5
877.407	5	2.9	Z20170518-33b_filtered	40.001	1	1036.4098-GSMSSAAEPPPPPPPESAPSKPAASIASGGSNSSNK	1	snf2h	snf2h1	63.1	NYTEE(3327.5677)EDR	952	snf2h	snf2h_slide	3	positional variants	19.4	1.7	adpbefx	3.6
737.799	5	-0.6	Z20170518-33b_filtered	61.548	1	ANRFEYLLK(821.4436)QTELFAHFIQPAAQK	99	snf2h	snf2h_auton	83	E(2844.5075)ILFYR	790	snf2h	snf2h_hand	9.5	unique	16.1	1.7	adpbefx	8
423.834	5	-0.3	Z20170518-33a_filtered	21.88	1	SAPATGGVK(809.4032)KPHR	36	h3	h3_tail	51	HAVSE(1286.7208)GTK	110	h2b	h2b_ap	13.5	unique	20.2	1.7	adpbefx	4.5
662.342	4	-0.7	Z20170518-33b_filtered	53.41	1	E(912.5393)SEITDEDIDGILER	668	snf2h	snf2h_negc	54.3	SK(1714.7897)LSEIVR	321	snf2h	snf2h_reca1	11.1	positional variants	15.5	1.7	adpbefx	2
602.024	3	0	Z20170518-33a_filtered	51.133	1	LFELLE(912.5393)K	788	snf2h	snf2h_hand	23.4	SK(872.5008)LSEIVR	321	snf2h	snf2h_reca1	16.6	unique	24	1.7	adpbefx	2
637.331	3	-0.8	Z20170518-33a_filtered	21.549	1	IK(1148.5210)KDEK+Incorrect Mono 1Da	130	snf2h	snf2h_auton	4.8	LDGQTPHDE(741.4385)R+Incorrect Mono 1Da	539	snf2h	snf2h_reca2	3	unique	29.4	1.7	adpbefx	2.7
819.735	3	1	Z20170518-33a_filtered	38.71	1	TEQEE(690.4065)DEELLTESSK	152	snf2h	snf2h_auton	65.2	K(1747.7636)TIGYK	796	snf2h	snf2h_hand	8.6	positional variants	14	1.7	adpbefx	1.5
447.747	4	-6.9	Z20170518-33a_filtered	45.083	1	IAFTEWIE(456.2696)PPK+Incorrect Mono 1Da	734	snf2h	snf2h4	3.9	AEK(1311.6863)K+Incorrect Mono 1Da	1025	snf2h	snf2h5	-8.5	unique	38.7	1.7	adpbefx	3
618.936	5	0.9	Z20170518-33b_filtered	60.182	1	IAFTE(1602.8415)WIEPPKR+Incorrect Mono 1Da	731	snf2h	snf2h4	17.3	FLIC(Carbamidomethyl)MLHK(1467.7874)LGFDK+Incorrect Mono 1Da	963	snf2h	snf2h_slide	7.1	unique	30.2	1.7	adpbefx	2
1069.26	4	-4	Z20170518-33b_filtered	44.496	1	GSMSSAAEPPPPPPPESAPSK(926.4458)PAASIASGGSNSSNK+Incorrect Mono 1Da	21	snf2h	snf2h1	30.1	D(3327.5677)DIENIAR+Incorrect Mono 1Da	865	snf2h	snf2h_sant	3.9	positional variants	27.5	1.7	adpbefx	1.3
1069.26	4	-4	Z20170518-33b_filtered	44.496	1	GSMSSAAEPPPPPPPESAPSK(926.4458)PAASIASGGSNSSNK+Incorrect Mono 1Da	21	snf2h	snf2h1	30.1	DD(3327.5677)IENIAR+Incorrect Mono 1Da	866	snf2h	snf2h_sant	3.9	positional variants	27.5	1.7	adpbefx	1.3
1102.53	3	6.2	Z20170518-33b_filtered	58.795	1	IDEAESLNDEELEEKE(1284.6357)K+Incorrect Mono 1Da	837	snf2h	snf2h_hand	20.4	M(Oxidation)DGAPDGRGRK(2000.9062)K+Incorrect Mono 1Da	1049	snf2h	snf2h5	-2.3	positional variants	30.3	1.7	adpbefx	1.1
454.657	5	-0.3	Z20170518-33b_filtered	40.351	1	LD(1140.6192)SIVIQQGR	630	snf2h	snf2h_reca2	26.8	YK(1109.6193)APFHQLR	931	snf2h	snf2h_slide	19.9	unique	17.6	1.7	adpbefx	3
1102.53	3	6.2	Z20170518-33b_filtered	58.795	1	IDEAESLNDEELEE(1284.6357)KEK+Incorrect Mono 1Da	835	snf2h	snf2h_hand	20.4	M(Oxidation)DGAPDGRGRK(2000.9062)K+Incorrect Mono 1Da	1049	snf2h	snf2h5	-2.3	positional variants	30.3	1.7	adpbefx	1.1
812.249	5	0.9	Z20170518-33b_filtered	80.804	1	VGAGAPVYLAAVLEYLTAE(1140.6192)ILELAGNAAR+Incorrect Mono 1Da	61	h2a	h2a_ap	39.5	YK(2896.5698)APFHQLR+Incorrect Mono 1Da	931	snf2h	snf2h_slide	2.5	unique	22.3	1.7	adpbefx	8
897.005	4	-1.3	Z20170518-31a_filtered	83.087	1	VGAGAPVYLAAVLEYLTAE(669.4174)ILELAGNAAR	61	h2a	h2a_ap	97.2	K(2896.5698)QLATK	18	h3	h3_tail	3.9	unique	12.4	1.7	adpbefx	1.5
750.054	3	-2.1	Z20170518-33a_filtered	42.442	1	IYVGLSK(1052.4815)MQR+Incorrect Mono 1Da	420	snf2h	snf2h_reca2	6	FED(1175.6485)SPSYVK+Incorrect Mono 1Da	172	snf2h	snf2h2	5.5	positional variants	29.2	1.7	adpbefx	2
418.223	5	-1	Z20170518-33a_filtered	39.388	1	YK(926.4458)APFHQLR+Incorrect Mono 1Da	931	snf2h	snf2h_slide	31.4	DD(1140.6192)IENIAR+Incorrect Mono 1Da	866	snf2h	snf2h_sant	15.4	positional variants	20.7	1.7	adpbefx	3.5
963.494	4	2.3	Z20170518-33b_filtered	58.945	1	APRPPK(1583.7521)QPNVQDFQFFPPR+Incorrect Mono 1Da	769	snf2h	snf2h_hand	40.5	Q(Gln->pyro-Glu)PNVQD(2247.1701)FQFFPPR+Incorrect Mono 1Da	775	snf2h	snf2h_hand	25.1	unique	21.5	1.7	adpbefx	4
739.773	5	-0.2	Z20170518-33b_filtered	47.559	1	HGATHVFASK(924.5029)ESEITDEDIDGILER+Incorrect Mono 1Da	667	snf2h	snf2h_negc	37.6	LVD(2750.3148)QNLNK+Incorrect Mono 1Da	641	snf2h	snf2h_reca2	9.6	unique	23.1	1.7	adpbefx	2
737.696	4	1.1	Z20170518-33b_filtered	61.773	1	VTIAQGGVLPNIQSVLLPK(872.5008)K	118	h2a	h2a_ctail	78.6	LFE(2056.2408)LLEK	785	snf2h	snf2h_hand	6.3	unique	10.5	1.7	adpbefx	2
399.84	5	0.1	Z20170518-33a_filtered	33.689	1	D(669.4174)NIQGITKPAIR	24	h4	h4_tail	49.8	K(1306.7357)QLATK	18	h3	h3_tail	14.9	unique	22.2	1.6	adpbefx	4
527.68	5	0.1	Z20170518-33b_filtered	33.195	1	TPTSPLK(1052.4815)M(Oxidation)KPGRPR	121	snf2h	snf2h_auton	19.2	FED(1562.8715)SPSYVK	172	snf2h	snf2h2	19.2	positional variants	21.7	1.6	adpbefx	5
527.68	5	0.1	Z20170518-33b_filtered	33.195	1	TPTSPLKM(Oxidation)K(1052.4815)PGRPR	123	snf2h	snf2h_auton	19.2	FED(1562.8715)SPSYVK	172	snf2h	snf2h2	19.2	positional variants	21.7	1.6	adpbefx	2
600.109	5	-0.1	Z20170518-33b_filtered	53.389	1	TPE(1140.6192)EVIEYSAVFWER+Incorrect Mono 1Da	880	snf2h	snf2h_sant	28.9	YK(1835.8730)APFHQLR+Incorrect Mono 1Da	931	snf2h	snf2h_slide	11.3	positional variants	24.7	1.6	adpbefx	1.5
723.001	3	-0.3	Z20170518-33a_filtered	35.894	1	GK(926.4458)NYTEEEDR	947	snf2h	snf2h_slide	39.6	D(1221.5262)DIENIAR	865	snf2h	snf2h_sant	16.8	unique	22.2	1.6	adpbefx	2.5
829.749	3	-1.3	Z20170518-33a_filtered	44.207	1	DFNQFIK(1132.5513)ANEK+Incorrect Mono 1Da	857	snf2h	snf2h_sant	14.8	Q(Gln->pyro-Glu)VHPD(1334.6619)TGISSK+Incorrect Mono 1Da	48	h2b	h2b	2.4	unique	26.7	1.6	adpbefx	2
657.696	3	-0.1	Z20170518-33a_filtered	57.163	1	FDWFLK(872.5008)SR	992	snf2h	snf2h_slide	33.6	LFE(1079.5553)LLEK	785	snf2h	snf2h_hand	15.2	unique	22.2	1.6	adpbefx	2
538.519	4	0.2	Z20170518-33a_filtered	49.056	1	FDWFLK(1052.4815)SR	992	snf2h	snf2h_slide	27.6	FED(1079.5553)SPSYVK	172	snf2h	snf2h2	21.3	unique	26.2	1.6	adpbefx	2
542.872	5	0.7	Z20170518-33b_filtered	38.544	1	IDEAE(690.4065)SLNDEELEEKEK	826	snf2h	snf2h_hand	72	K(2000.9062)TIGYK	796	snf2h	snf2h_hand	13.9	positional variants	17.3	1.6	adpbefx	2.3
397.022	5	1.5	Z20170518-33b_filtered	43.074	1	YK(821.4436)APFHQLR	931	snf2h	snf2h_slide	35	E(1140.6192)ILFYR	790	snf2h	snf2h_hand	20.1	unique	20.6	1.6	adpbefx	6
542.872	5	0.7	Z20170518-33b_filtered	38.544	1	ID(690.4065)EAESLNDEELEEKEK	823	snf2h	snf2h_hand	72	K(2000.9062)TIGYK	796	snf2h	snf2h_hand	13.9	positional variants	17.3	1.6	adpbefx	2.8
694.958	5	0.5	Z20170518-33b_filtered	48.75	1	APRPPK(1204.5724)QPNVQDFQFFPPR	769	snf2h	snf2h_hand	38.5	FITD(2247.1701)NTVEER	612	snf2h	snf2h_reca2	14.8	unique	19.6	1.6	adpbefx	2.5
514.472	5	1.4	Z20170518-33b_filtered	35.009	1	TPTSPLK(1002.4328)MKPGRPR	121	snf2h	snf2h_auton	23.1	ENME(1546.8766)LEEK	1016	snf2h	snf2h5	19.3	unique	25.8	1.6	adpbefx	2.2
670.593	4	0.9	Z20170518-33b_filtered	50.68	1	TPEEVIE(823.4552)YSAVFWER+Incorrect Mono 1Da	884	snf2h	snf2h_sant	24	GPK(1835.8730)PSTQK+Incorrect Mono 1Da	1031	snf2h	snf2h5	2.5	unique	25.2	1.6	adpbefx	4
679.353	3	-2.6	Z20170518-35_filtered	38.254	1	LLTQGFTNWNK(557.2558)R+Incorrect Mono 1Da	849	snf2h	snf2h_sant	4.4	E(1458.7732)QGSR+Incorrect Mono 1Da	499	snf2h	snf2h_reca2	-2.3	unique	34.3	1.6	adpbefx	4
[truncated: 460 more rows]

## Sheet: LANA peptide ADP-BeFx xlinks
m/z	z	ppm	Fraction	RT	Spectrum	Peptide 1	pep1.xlinked_aa	pep1.accession	pep1.modul	pep1.half_score	Peptide 2	pep2.xlinked_aa	pep2.accession	pep2.modul	pep2.half_score	ambig	scorediff	SVM score	source	spectral counts
[truncated: 1,102 more rows]
