# Supplementary figures and images for: The nucleosomal acidic patch relieves auto-inhibition by the ISWI remodeler SNF2h
Source: eLife journal article supplement (doi:10.7554/elife.35322), 2018-04-17

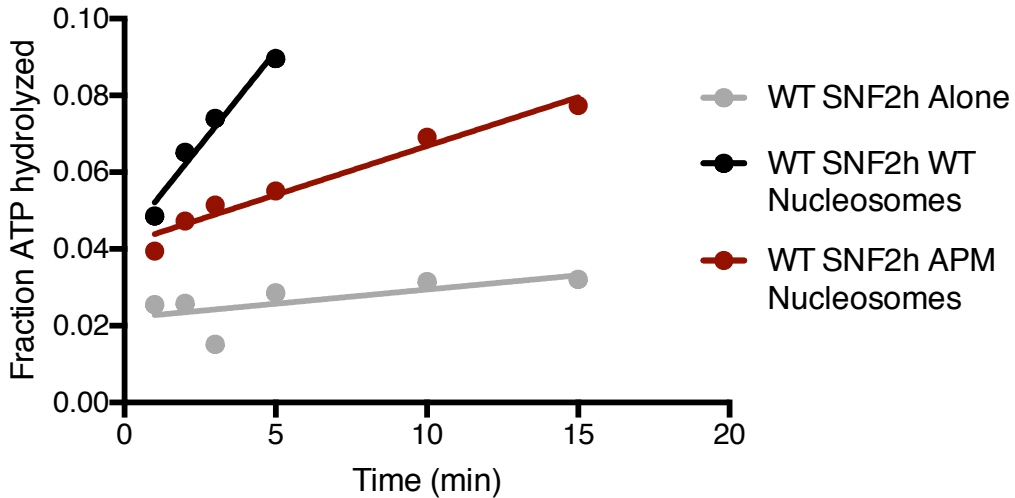

Supplement: supp [file elife_poa_e35322_Figure_1_figure_supplement_2.pdf › elife_poa_e35322_Figure_1_figure_supplement_2.pdf]

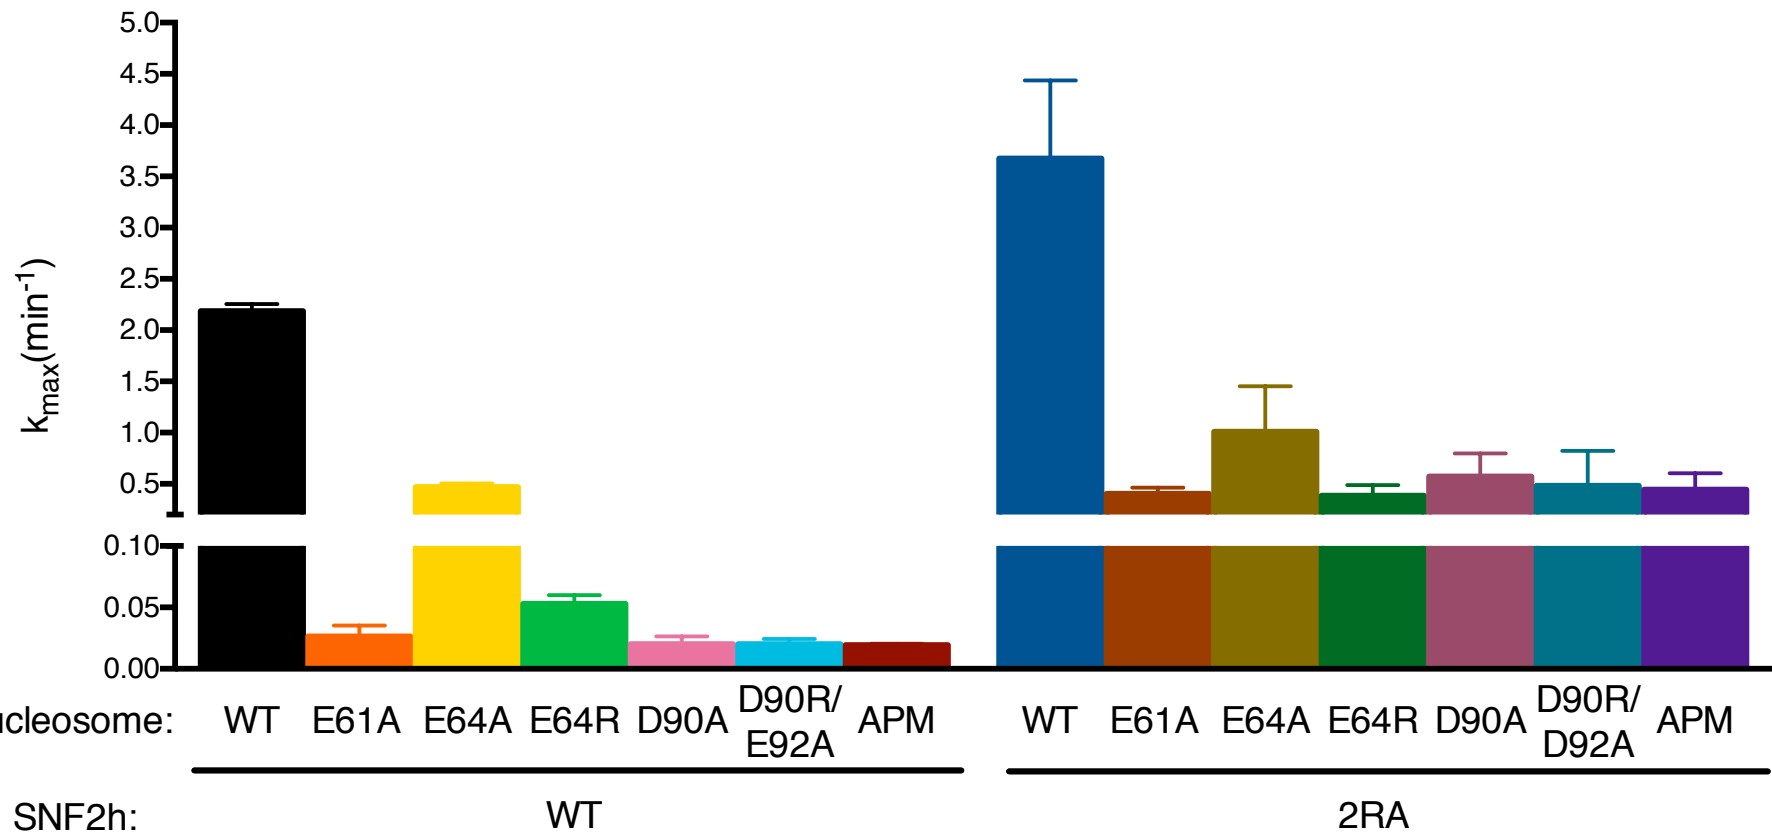

Supplement: supp [file elife_poa_e35322_Figure_1_figure_supplement_3.pdf › elife_poa_e35322_Figure_1_figure_supplement_3.pdf]

**A**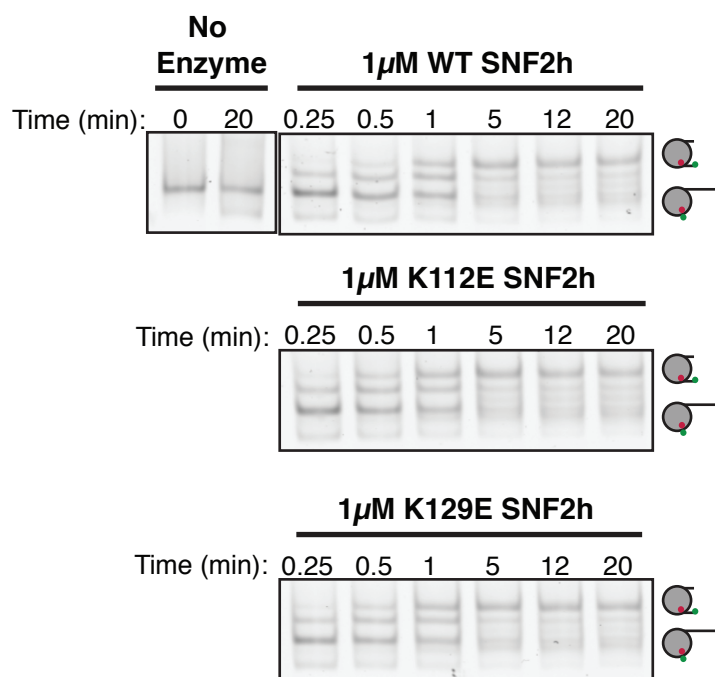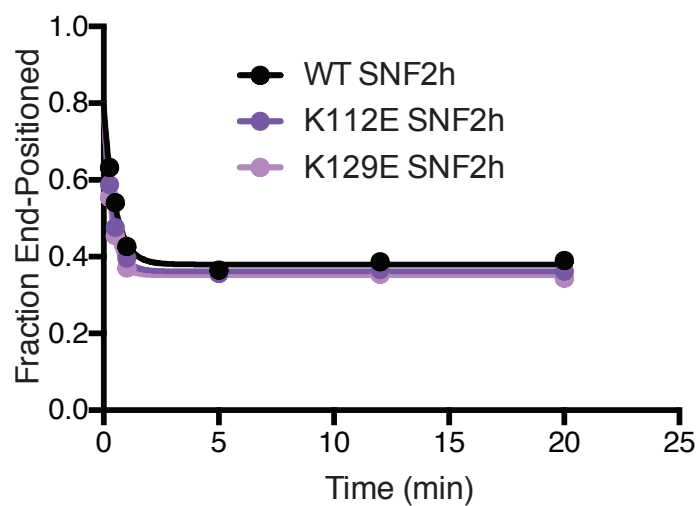**B**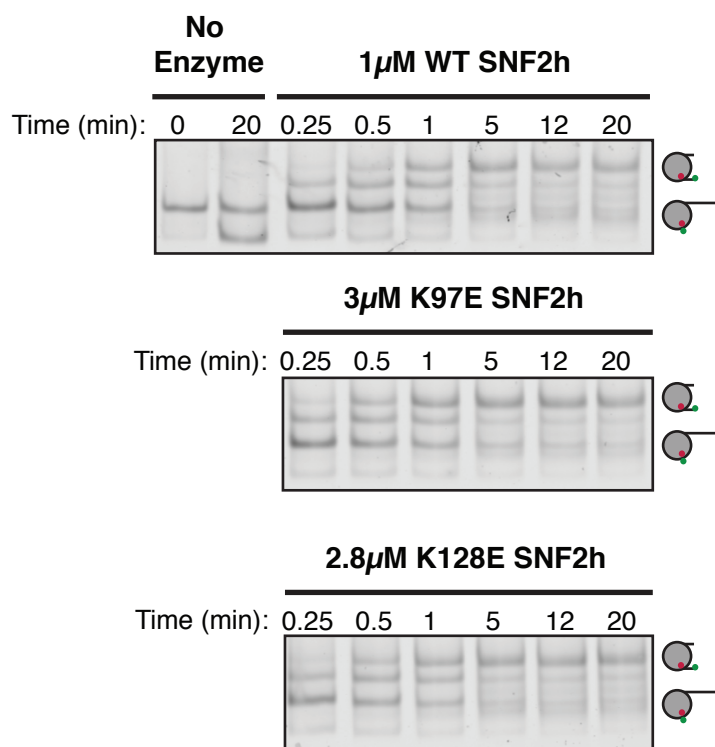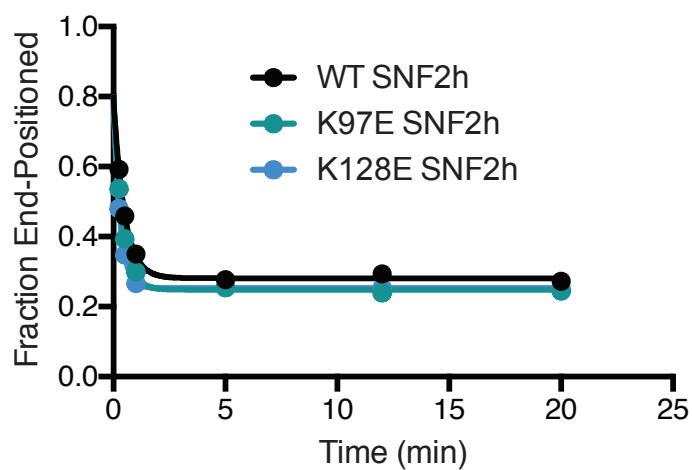

Supplement: supp [file elife_poa_e35322_Figure_2_figure_supplement_1.pdf › elife_poa_e35322_Figure_2_figure_supplement_1.pdf]

**A**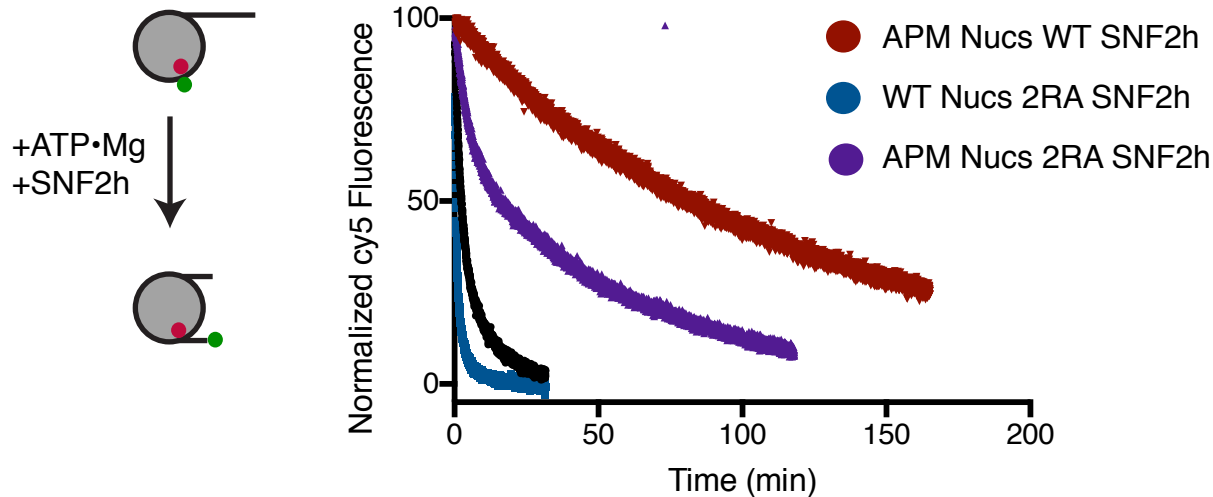**B**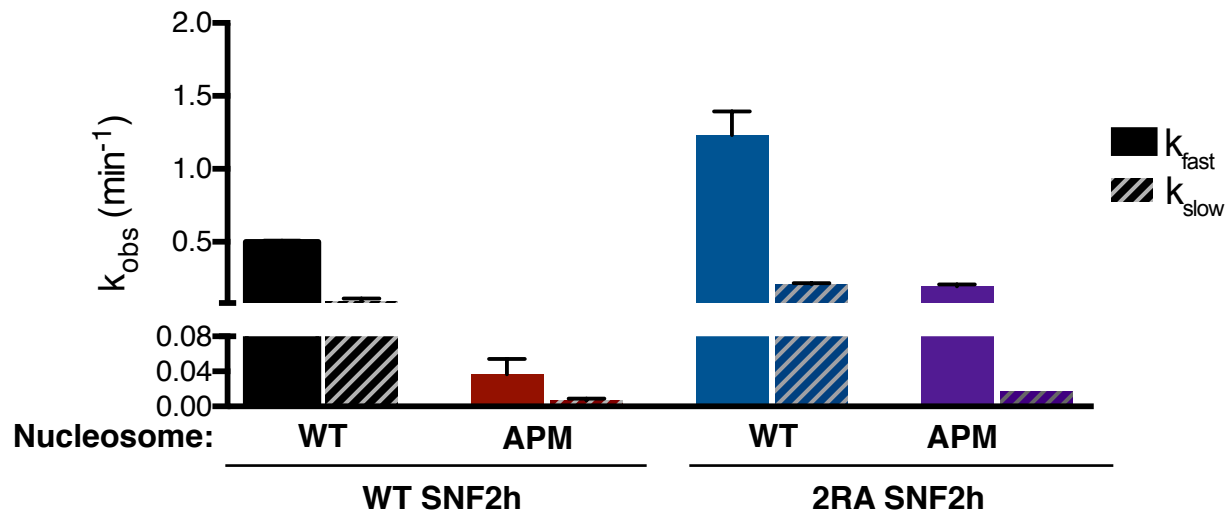

Supplement: supp [file elife_poa_e35322_Figure_2_figure_supplement_2.pdf › elife_poa_e35322_Figure_2_figure_supplement_2.pdf]

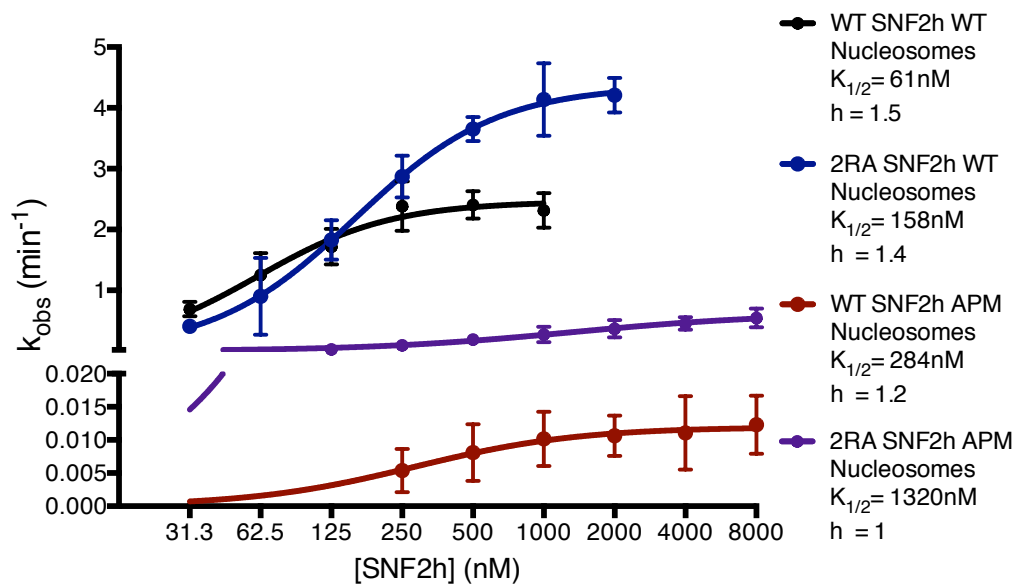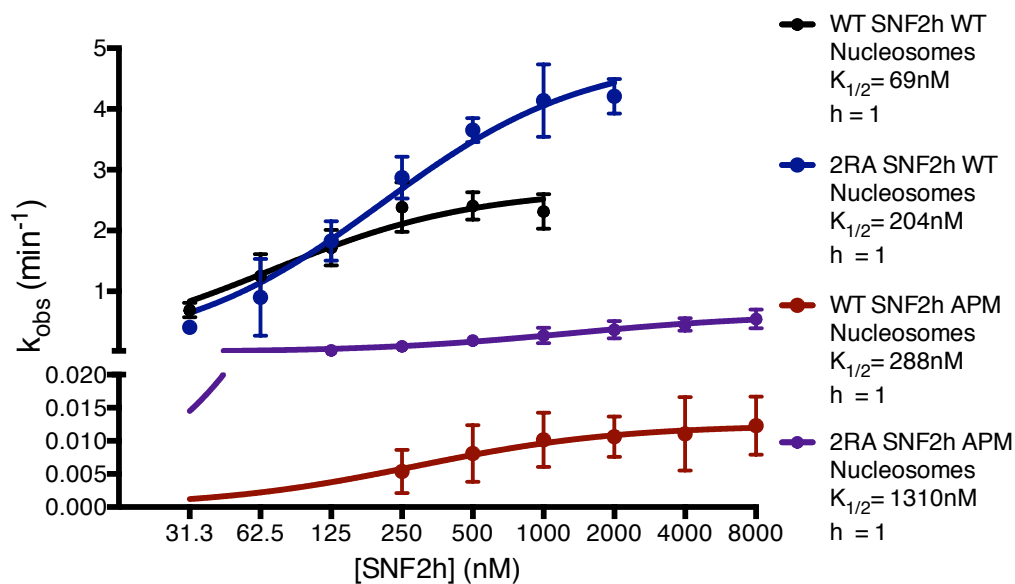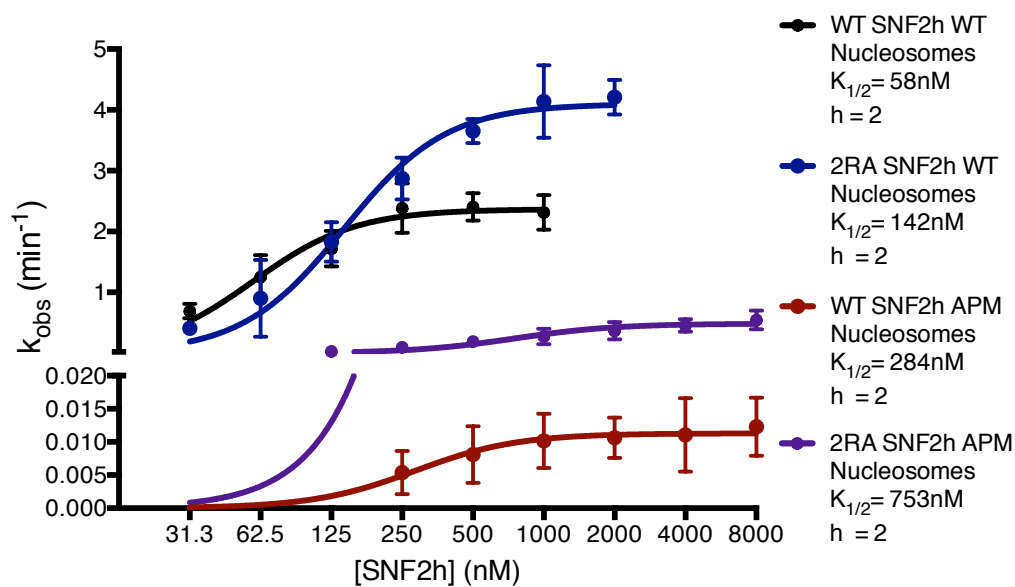

Supplement: supp [file elife_poa_e35322_Figure_2_figure_supplement_3.pdf › elife_poa_e35322_Figure_2_figure_supplement_3.pdf]

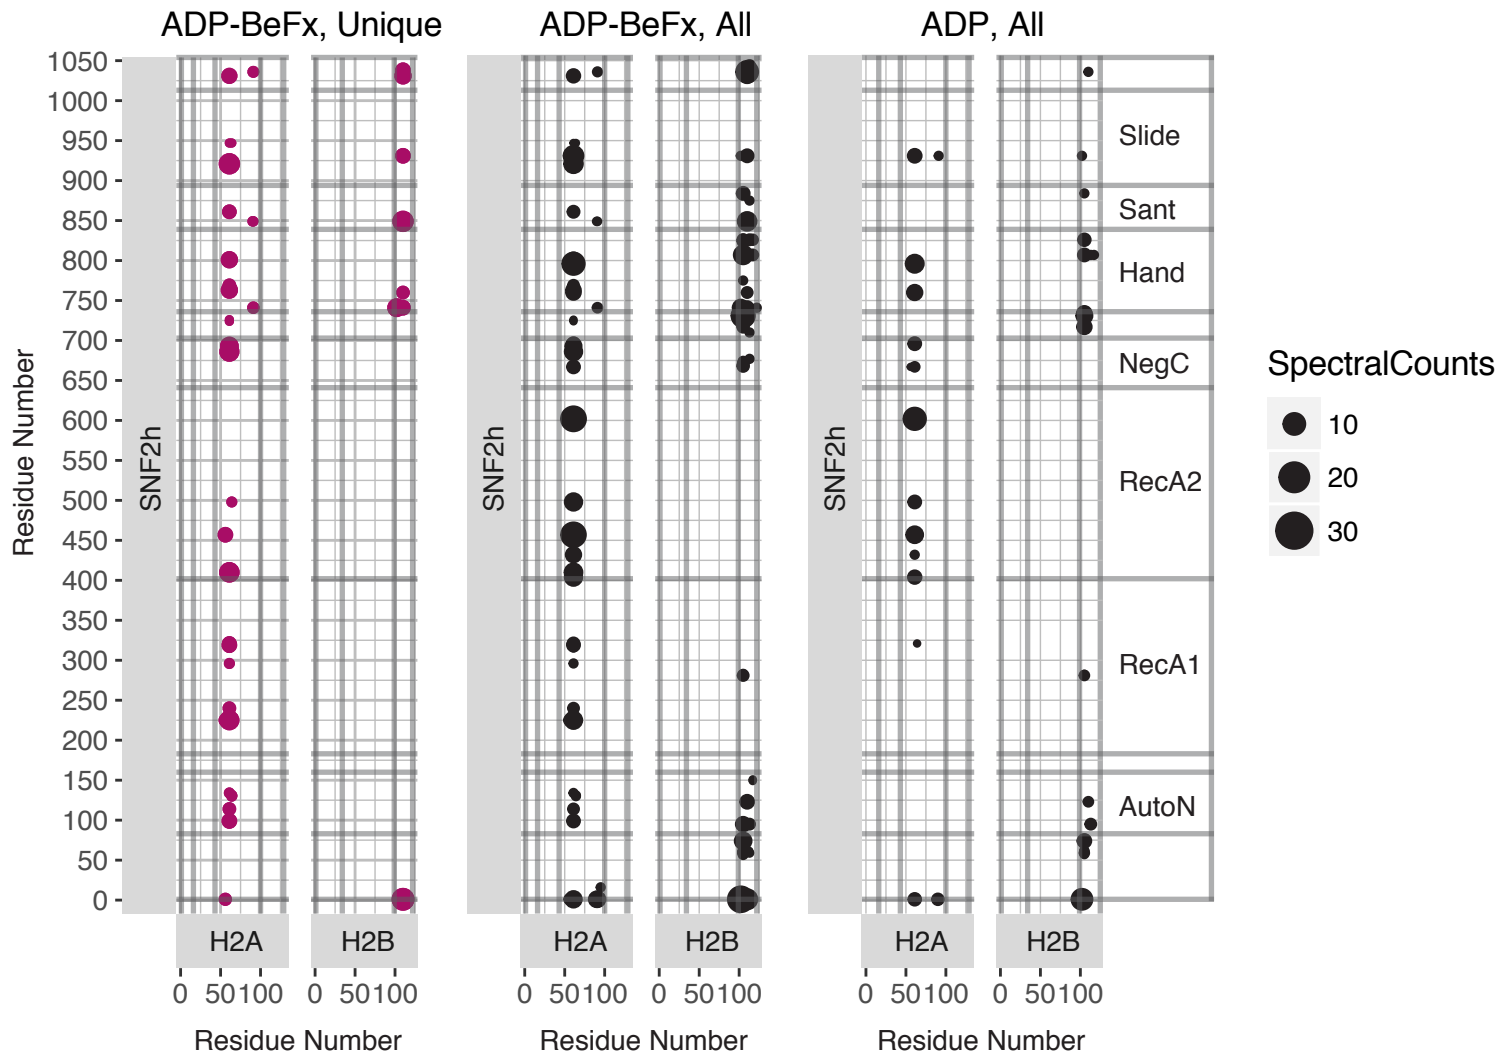

Supplement: supp [file elife_poa_e35322_Figure_2_figure_supplement_4.pdf › elife_poa_e35322_Figure_2_figure_supplement_4.pdf]

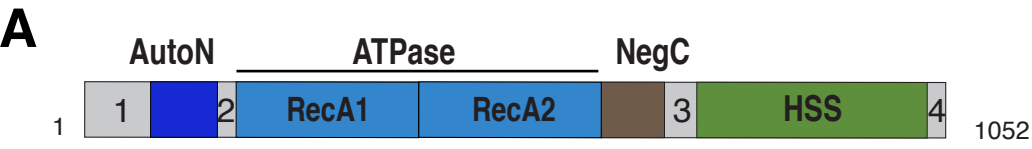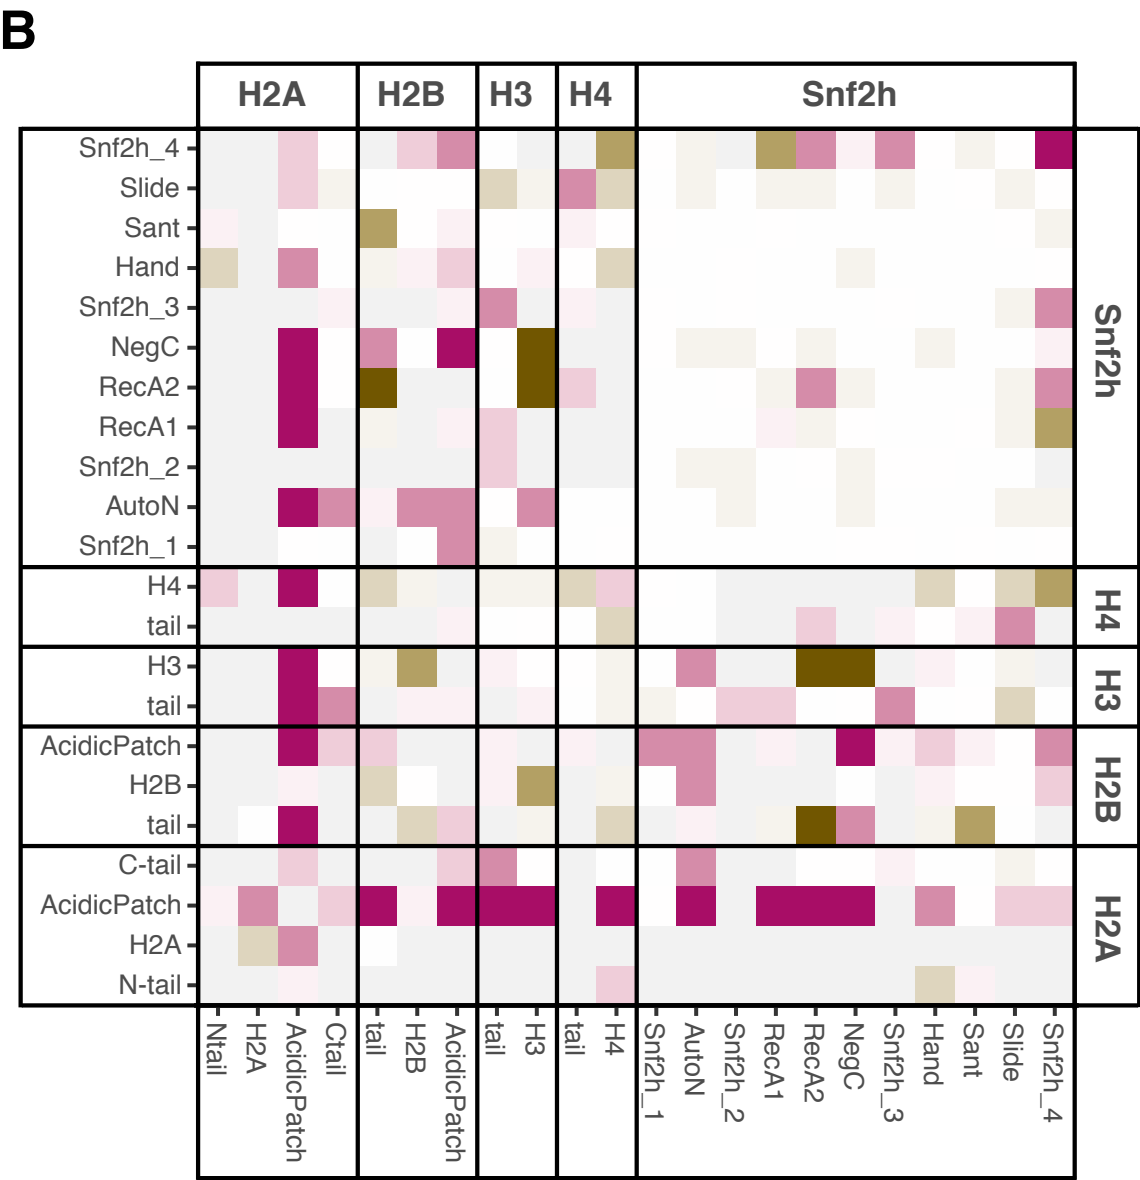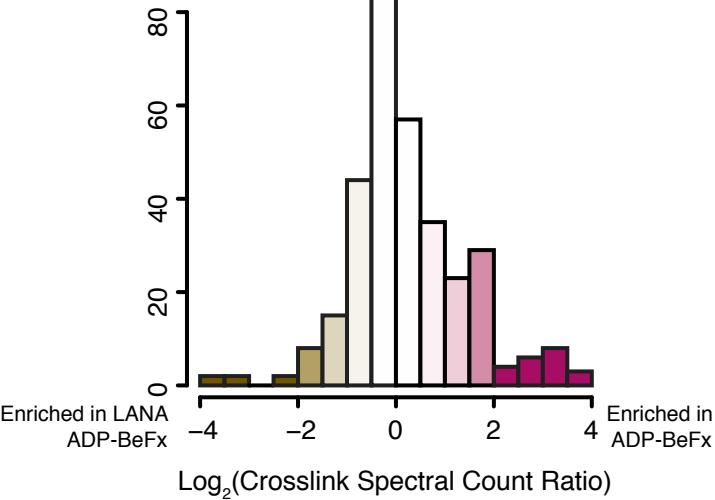

Supplement: supp [file elife_poa_e35322_Figure_2_figure_supplement_5.pdf › elife_poa_e35322_Figure_2_figure_supplement_5.pdf]

**A**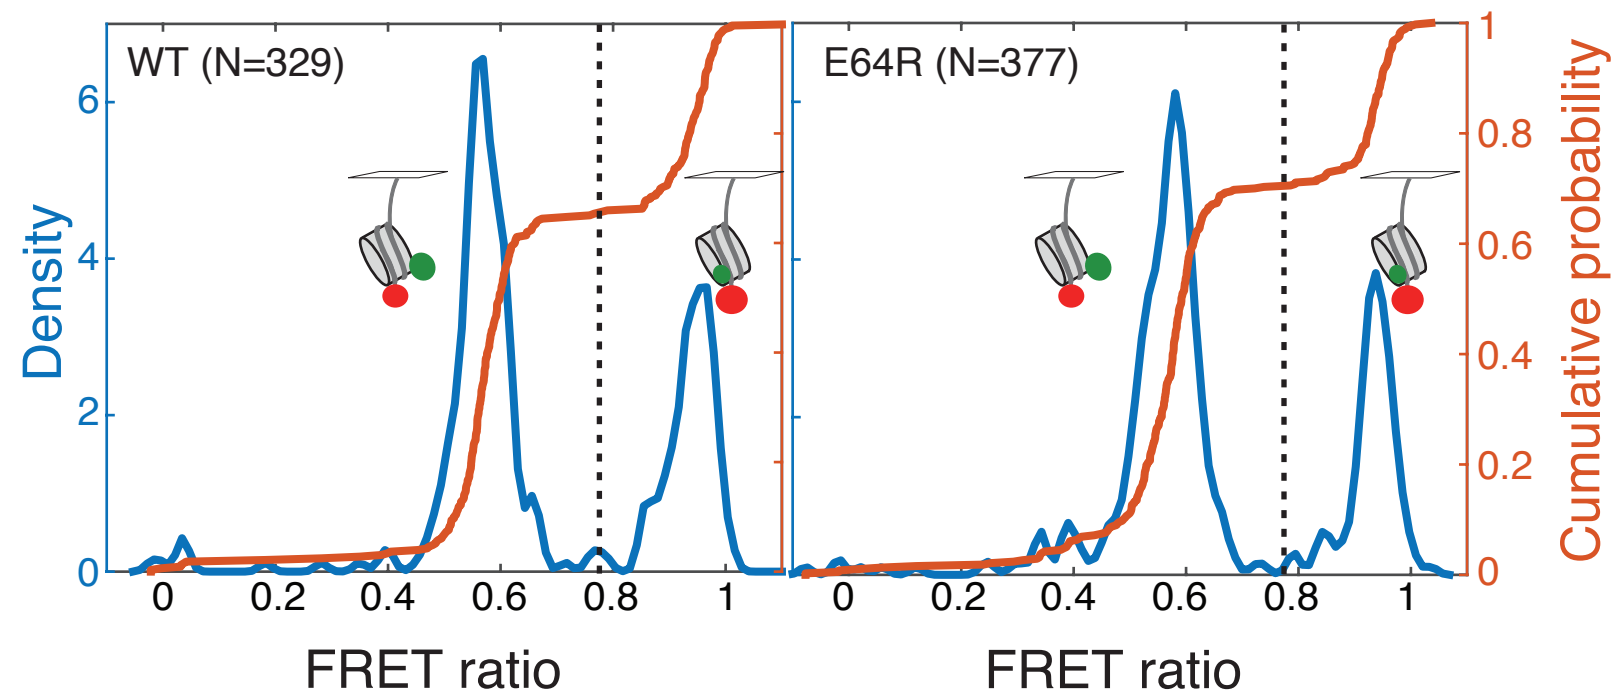**B**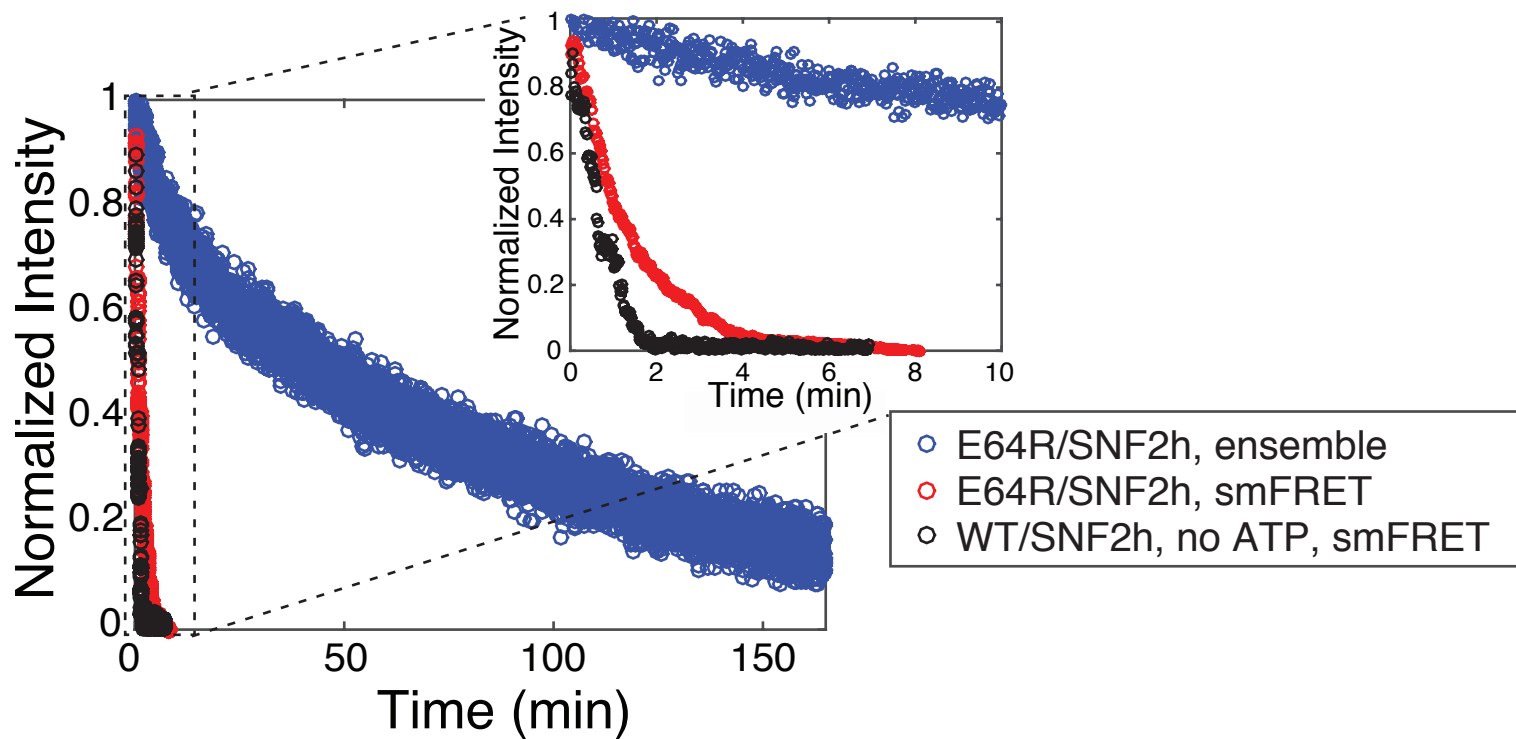

Supplement: supp [file elife_poa_e35322_Figure_3_figure_supplement_1.pdf › elife_poa_e35322_Figure_3_figure_supplement_1.pdf]

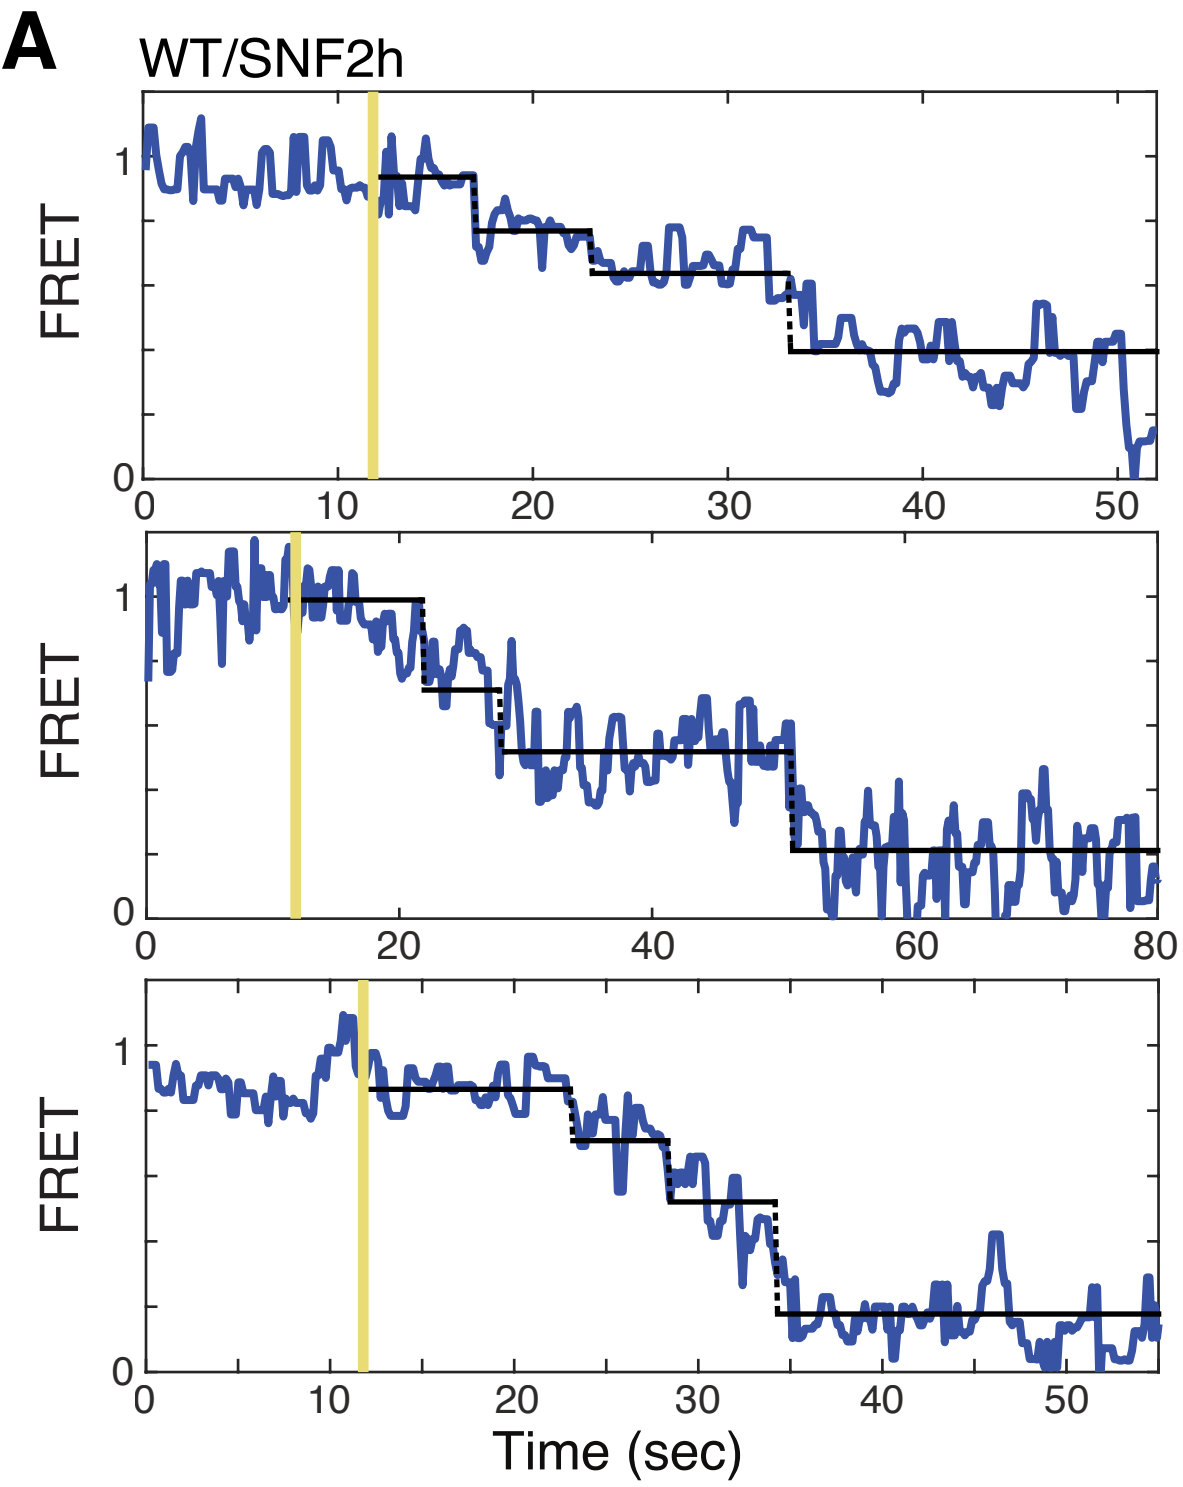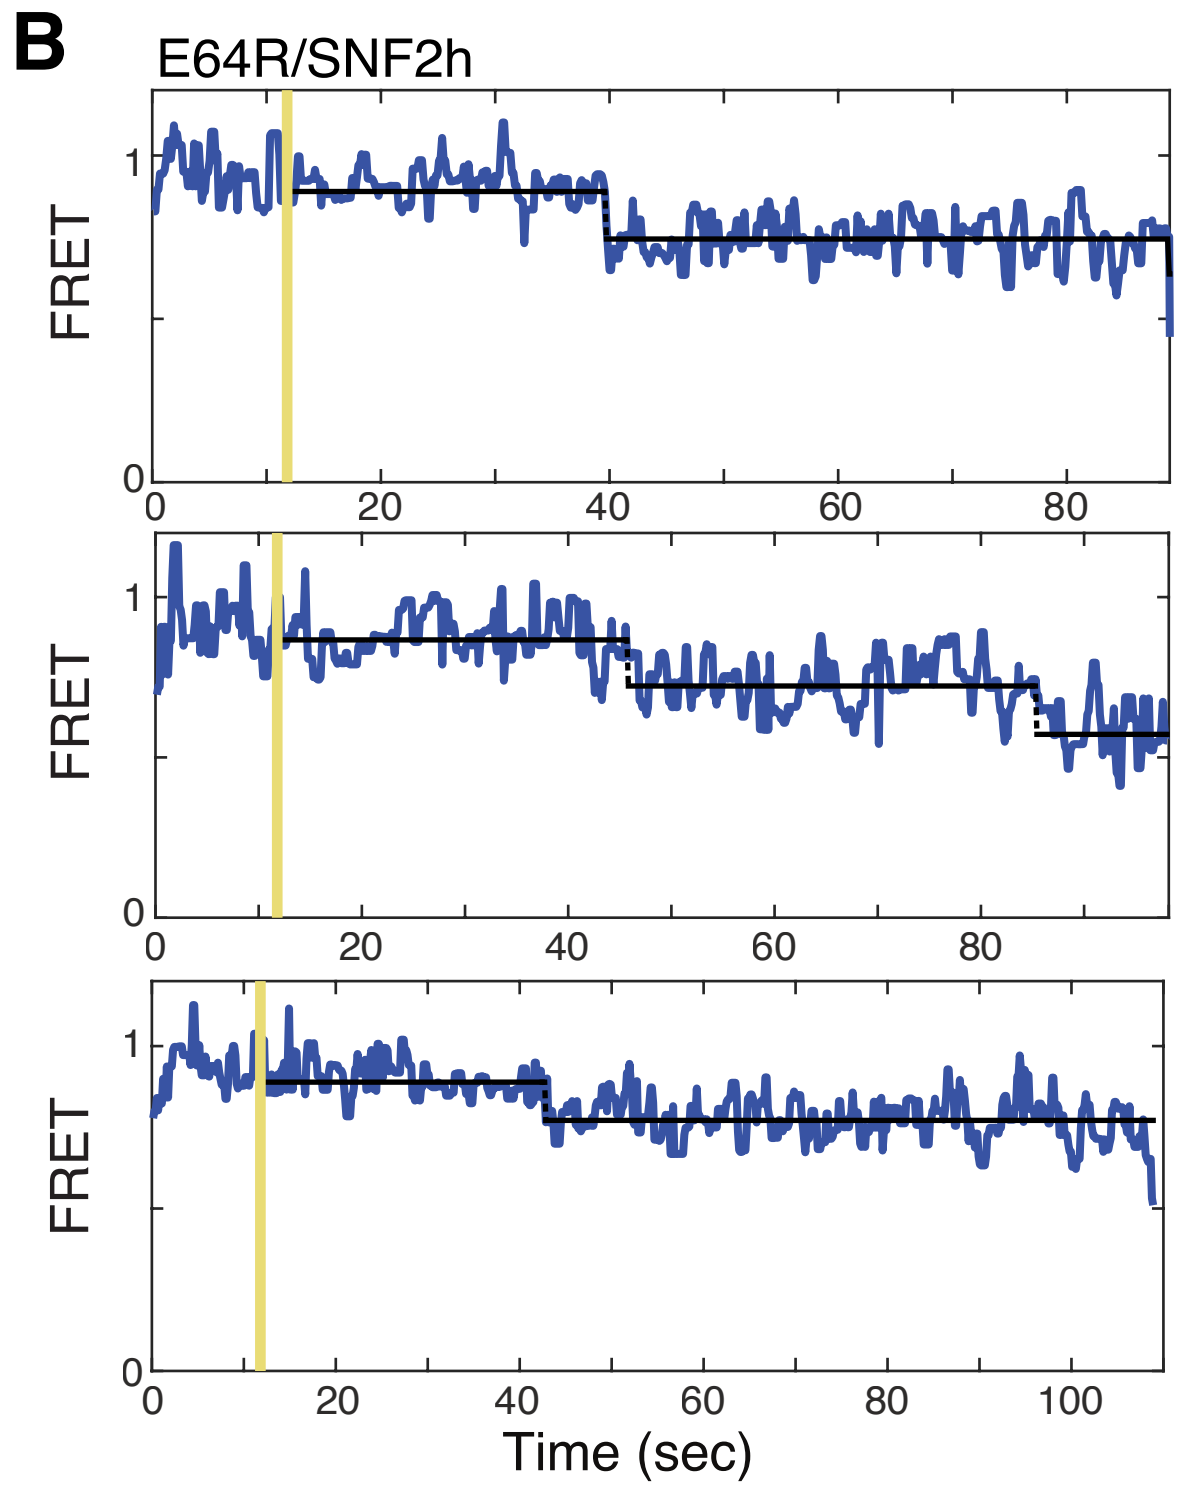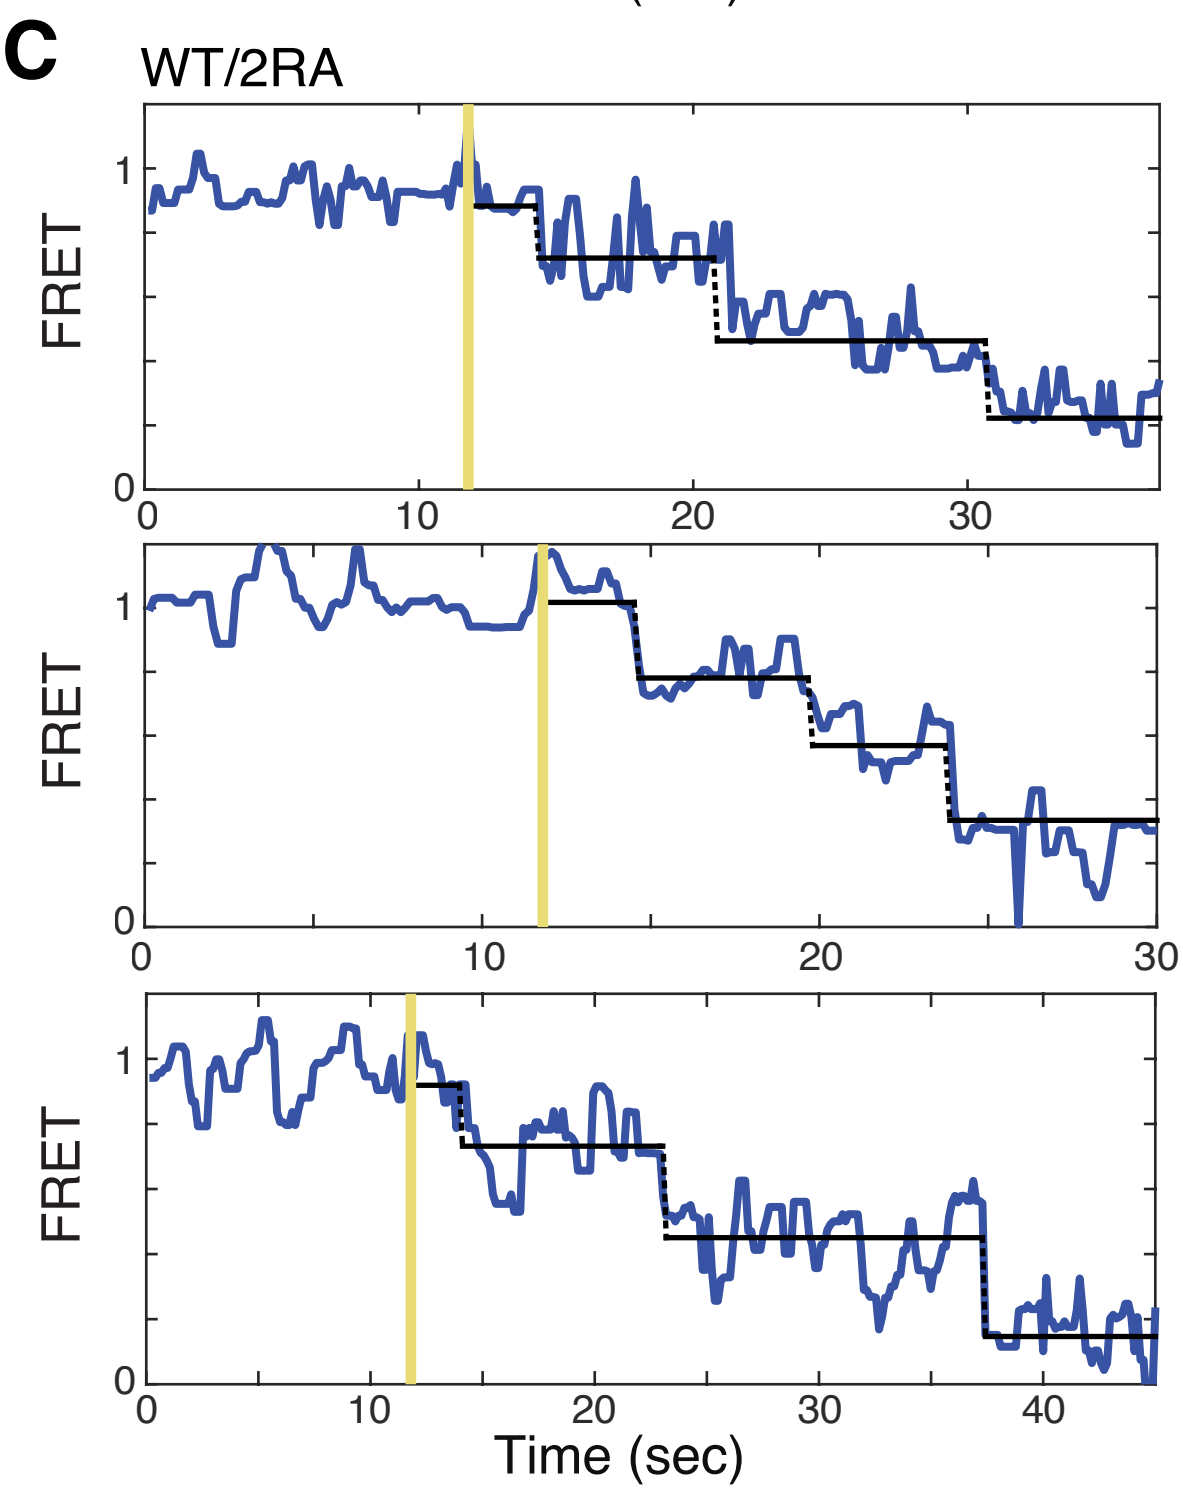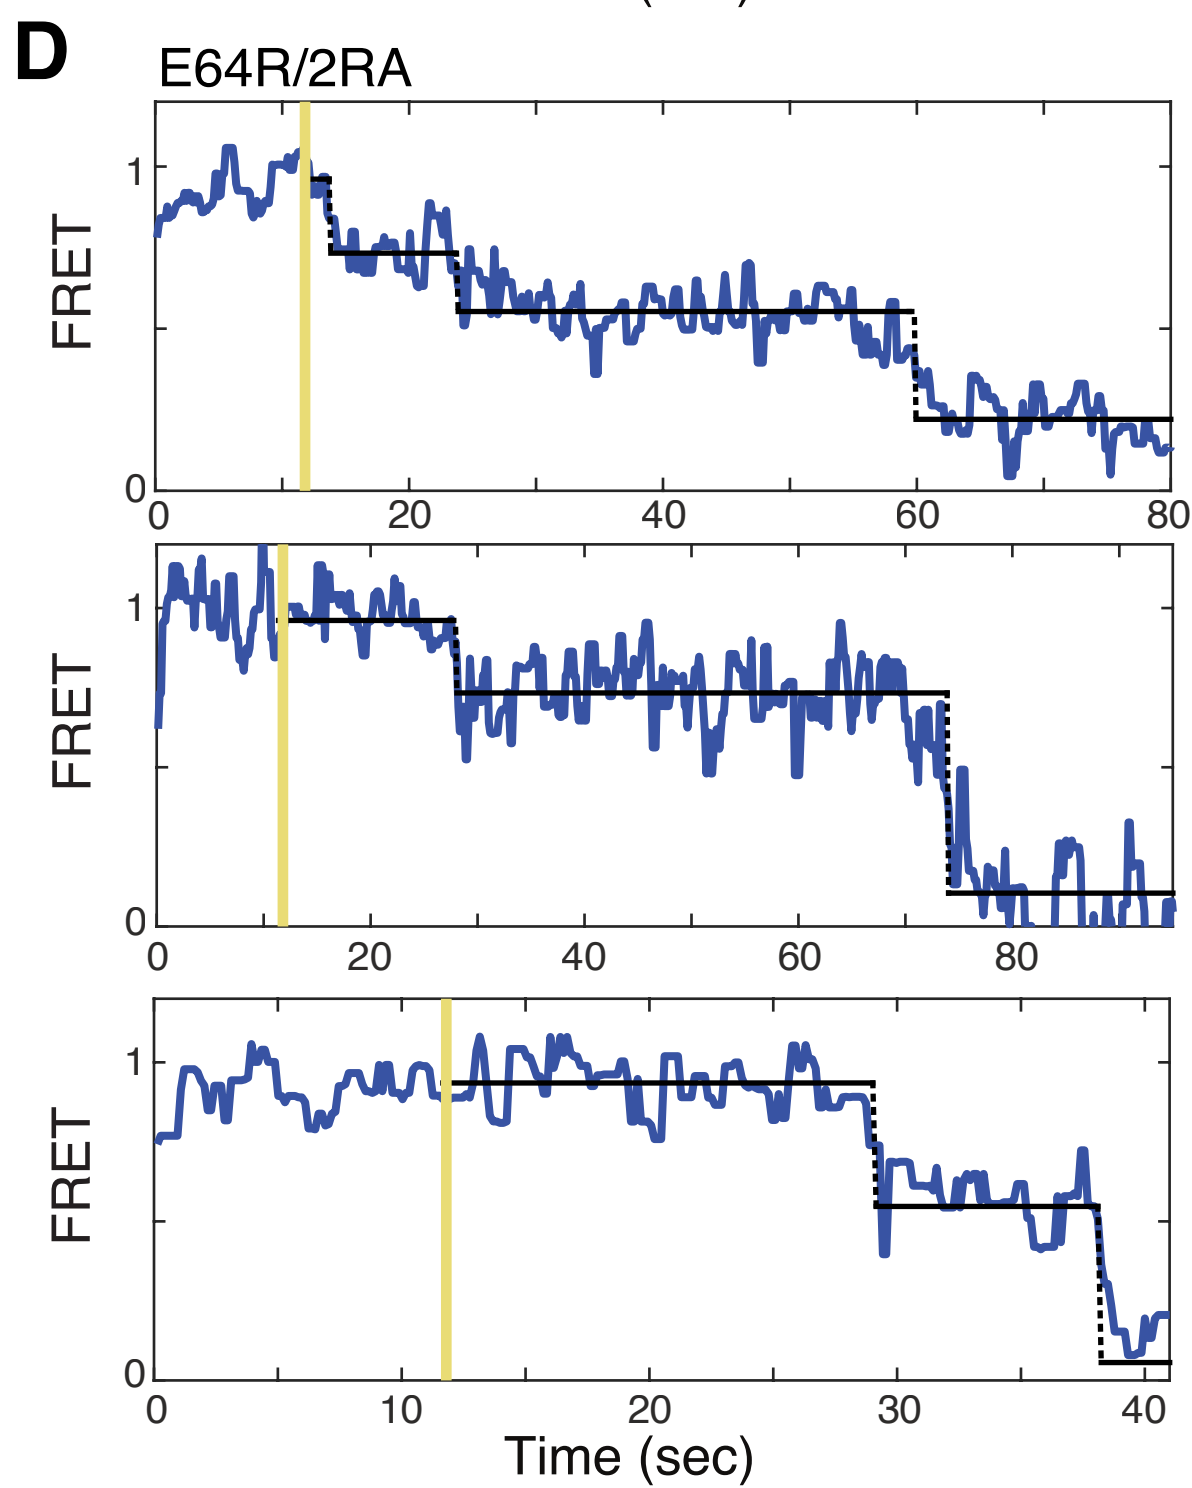

Supplement: supp [file elife_poa_e35322_Figure_3_figure_supplement_2.pdf › elife_poa_e35322_Figure_3_figure_supplement_2.pdf]

**A**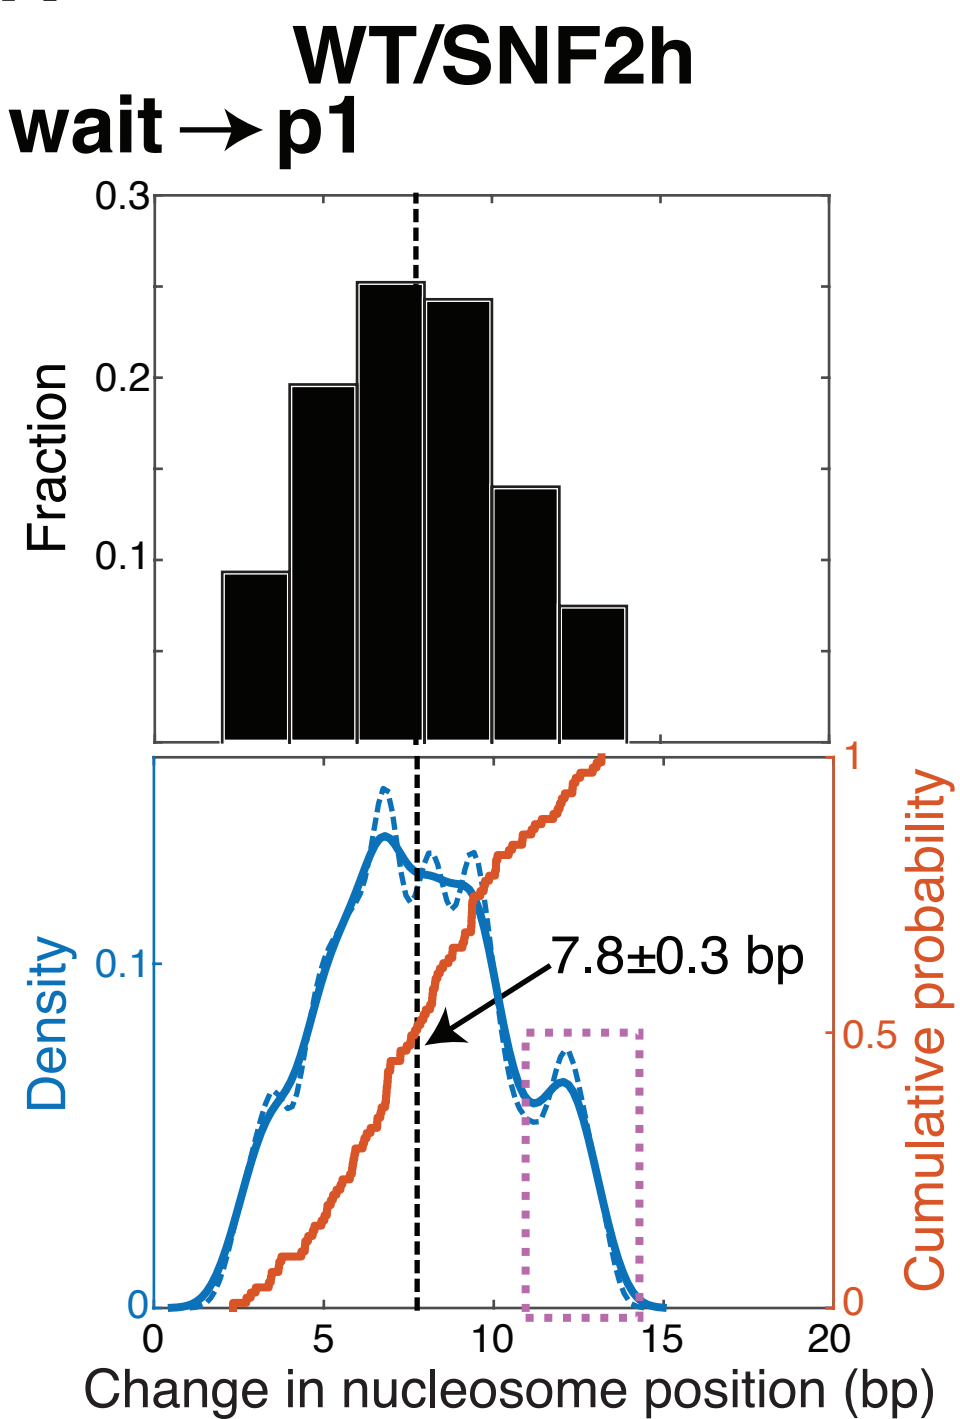**p1 → p2**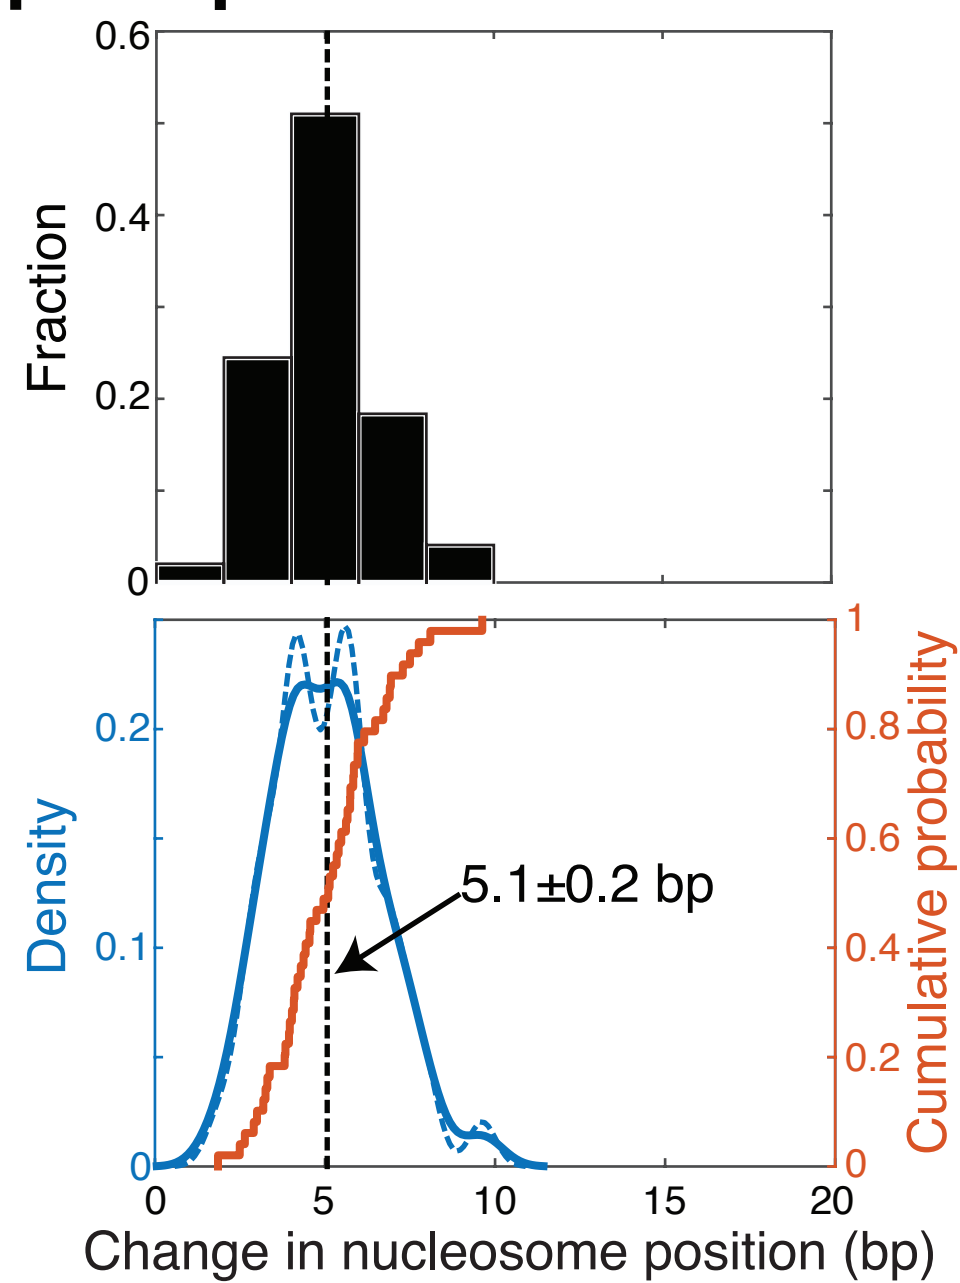**B**

**E64R/SNF2h**  
**wait → p1**

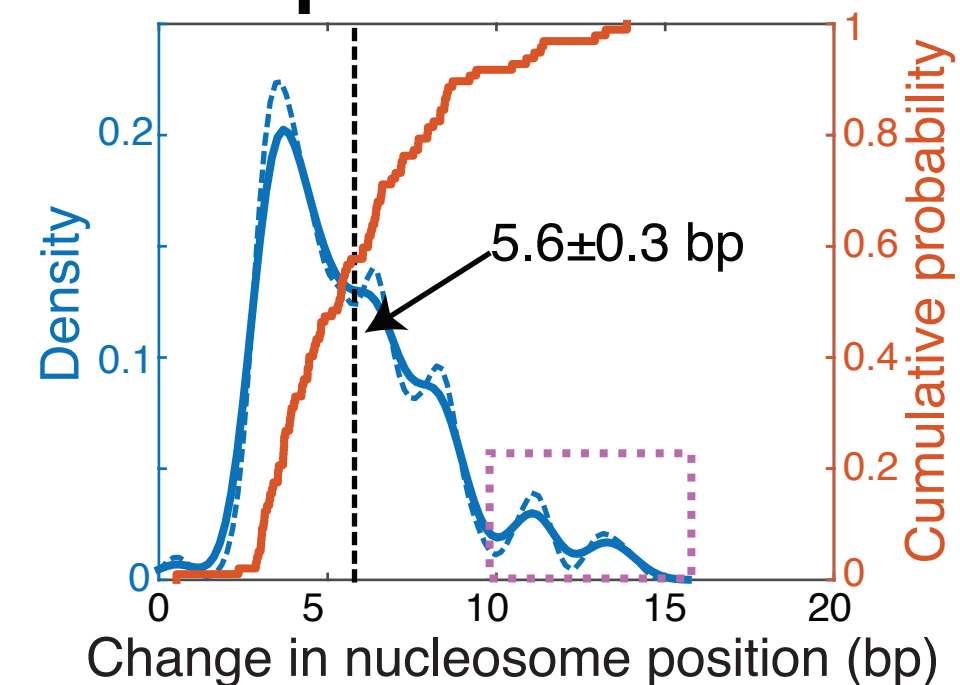

**WT/2RA**

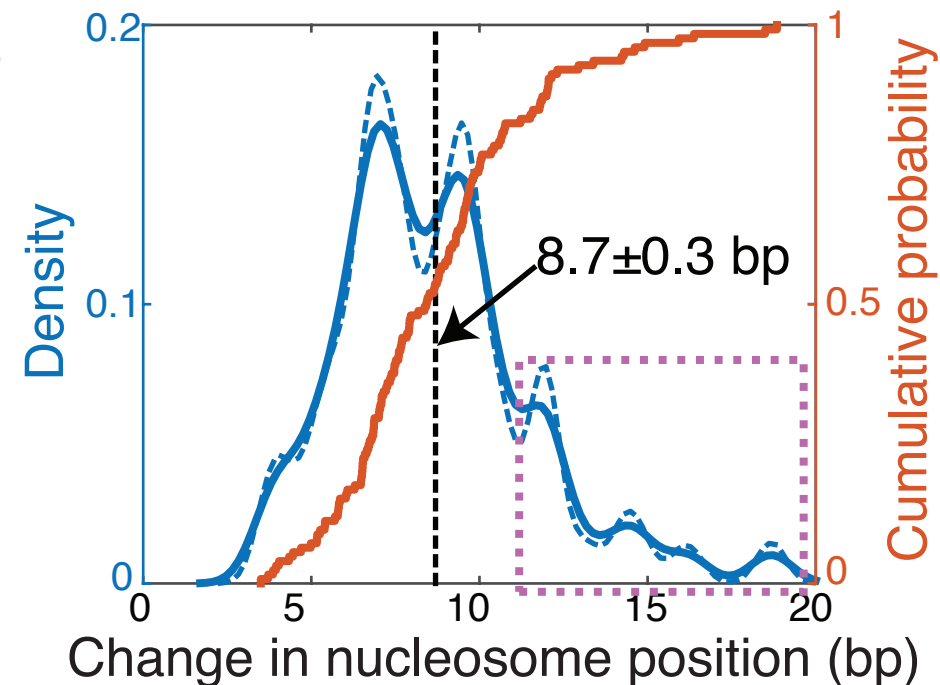

**E64R/2RA**

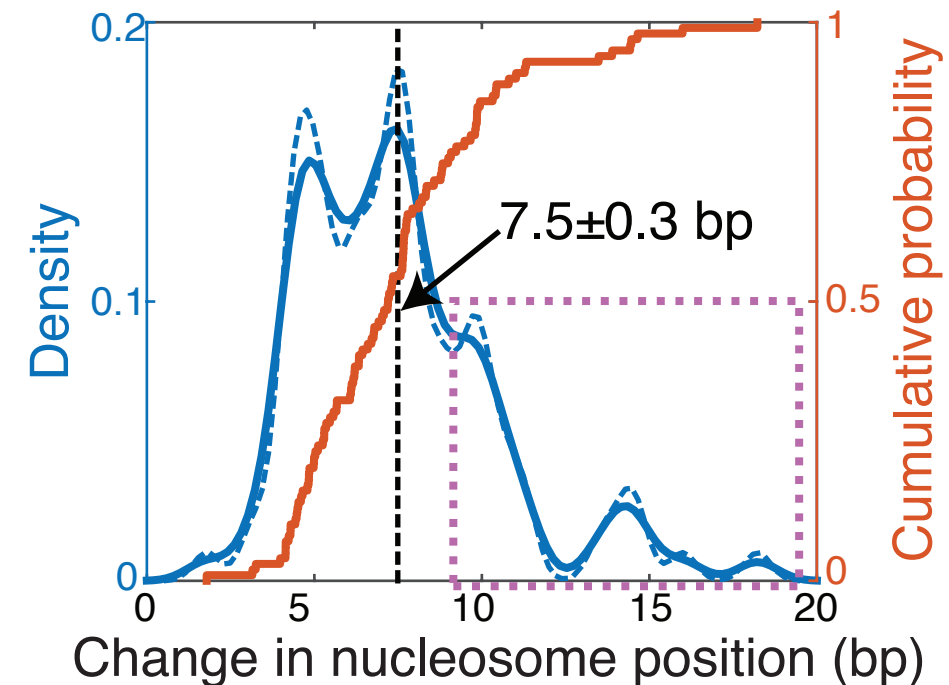

**p1 → p2**

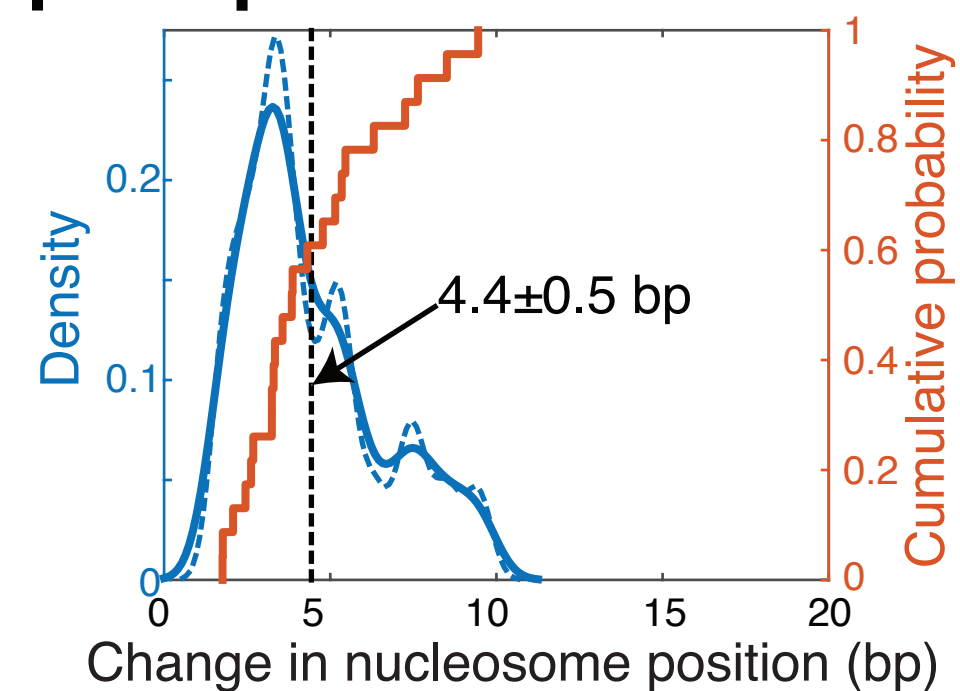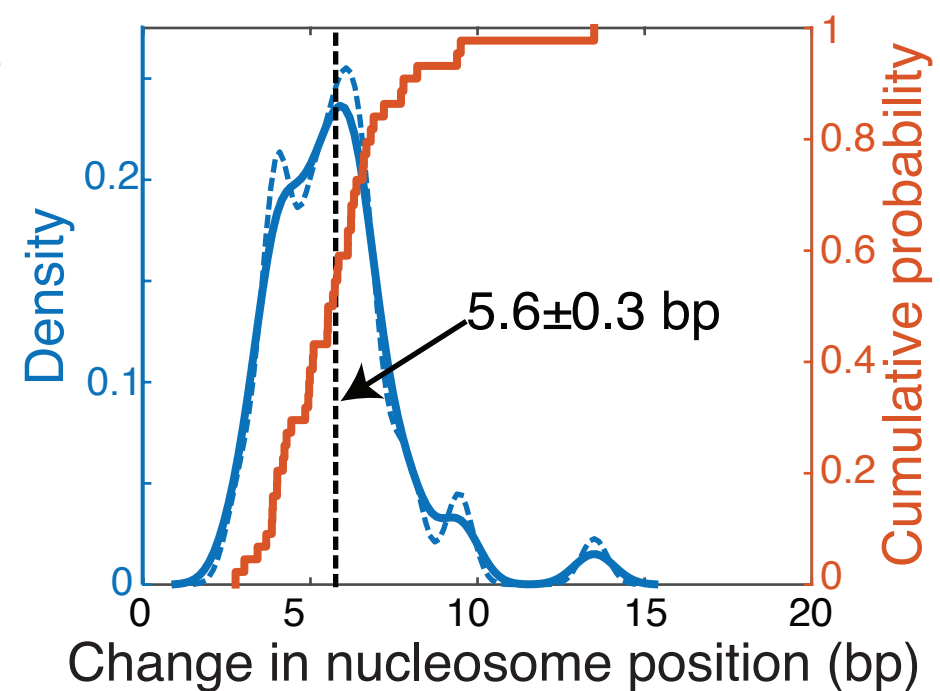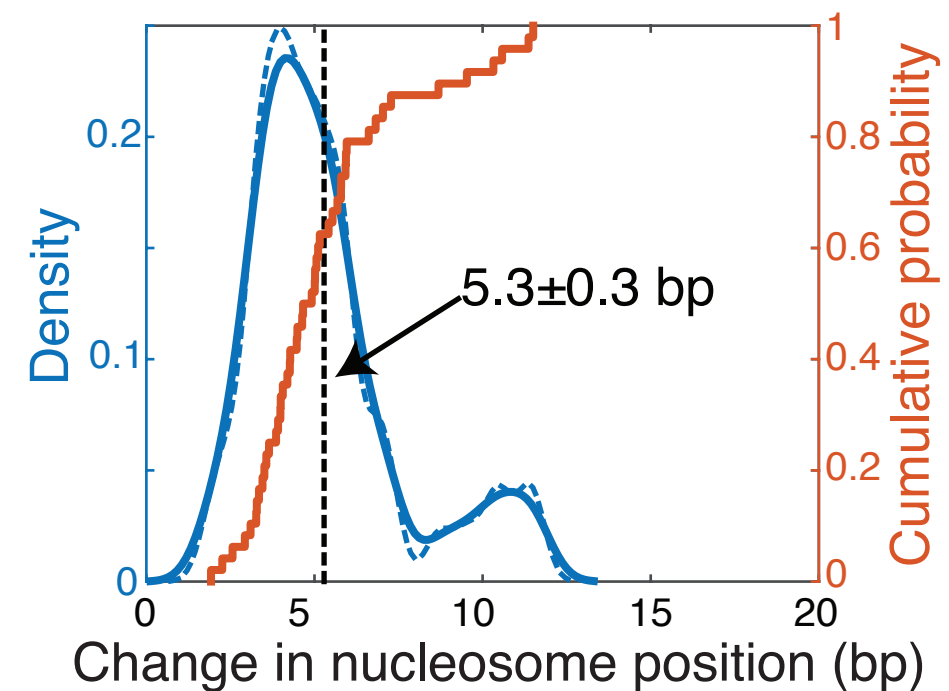

Supplement: supp [file elife_poa_e35322_Figure_3_figure_supplement_3.pdf › elife_poa_e35322_Figure_3_figure_supplement_3.pdf]
